# Supplementary material for: Important Odorants of Four Brassicaceae Species, and Discrepancies between Glucosinolate Profiles and Observed Hydrolysis Products
Source: MDPI journal article supplement (doi:10.3390/foods10051055), 2021-05-11

# Supplementary data S1. Compound fragmentation spectra with corresponding library matches (where available) and GC-MS chromatograms.

For number coding and references please see Table 2.

## 1. Carbon disulfide

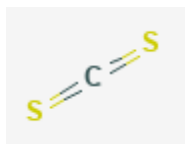

Library Searched : C:\Database\NIST11.L

Quality : 90

ID : Carbon disulfide

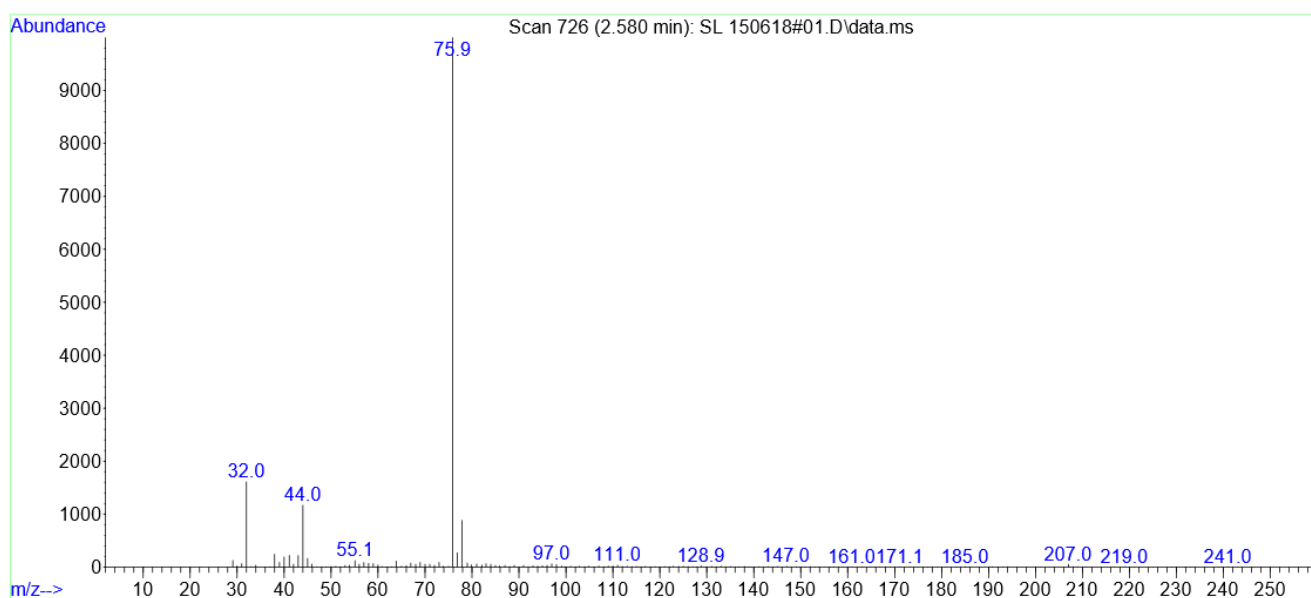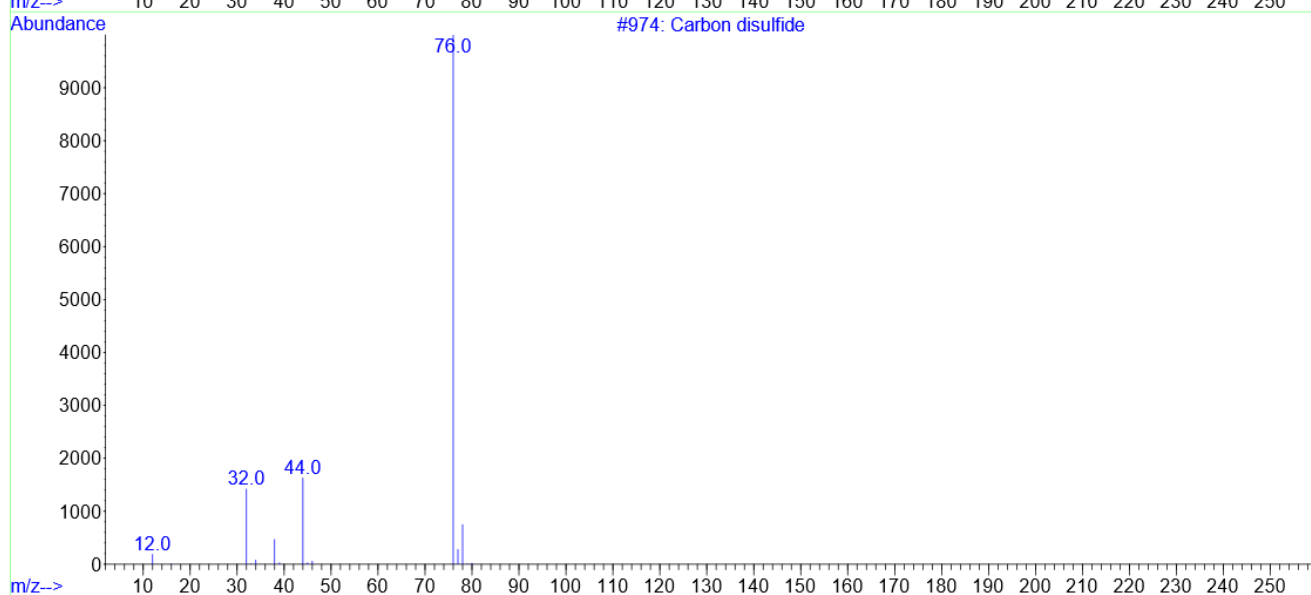

## 2. Methyl thiocyanate

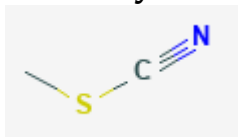

Library Searched : C:\Database\NIST11.L

Quality : 91

ID : Thiocyanic acid, methyl ester

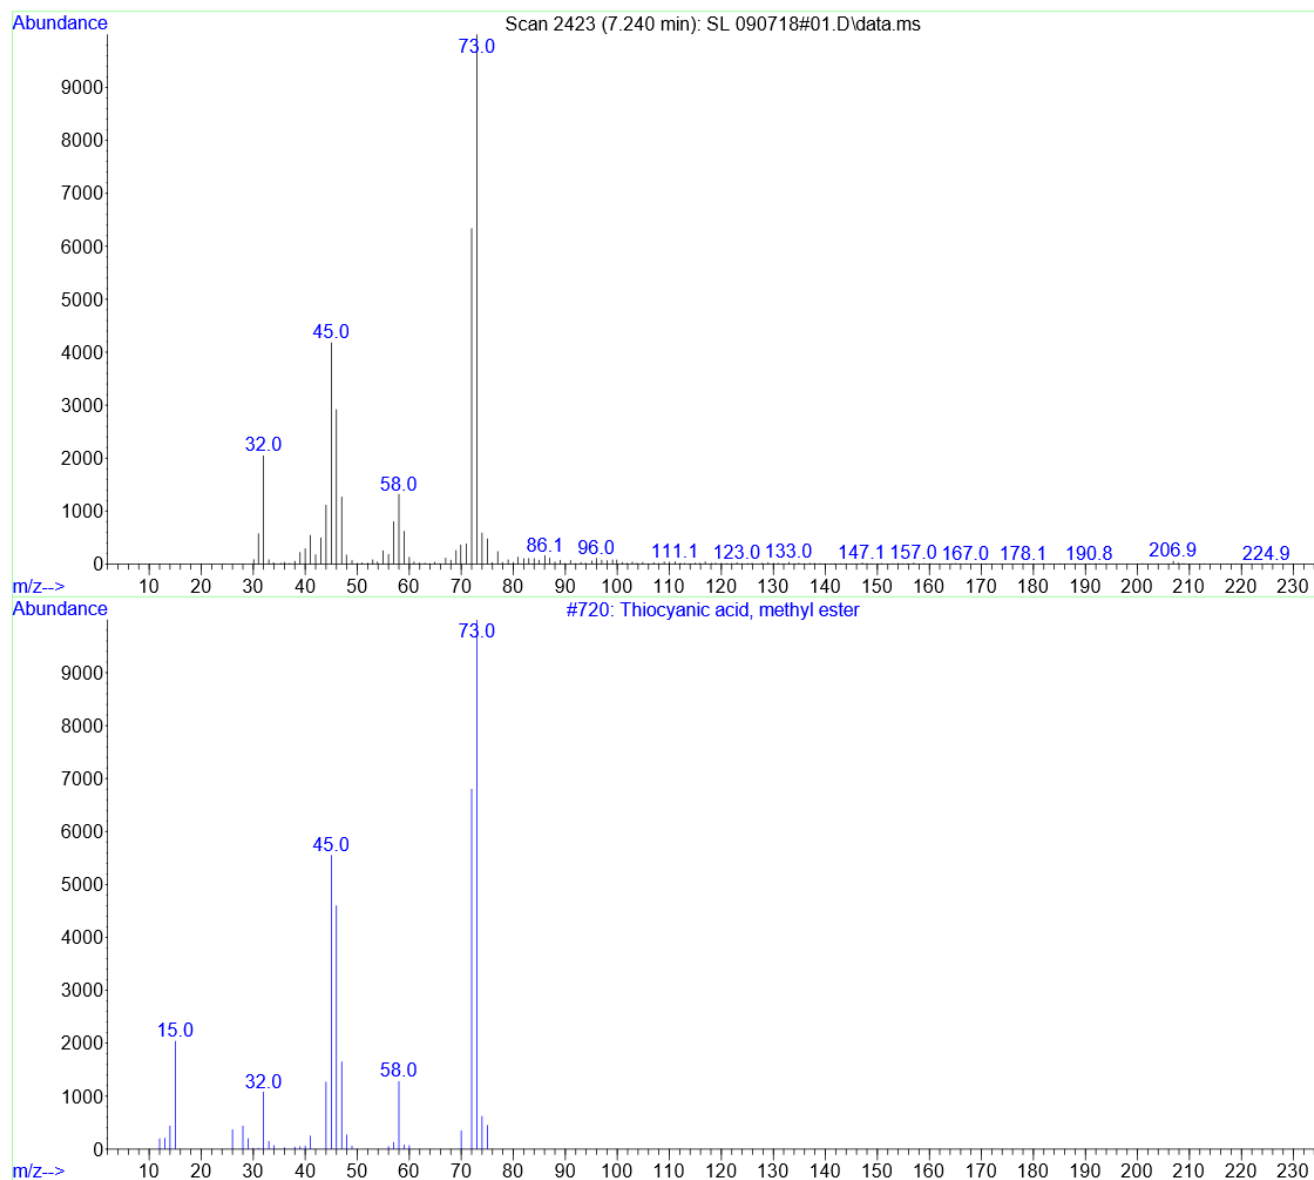

### 3. Isopropyl isothiocyanate

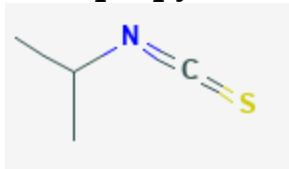

Library Searched : C:\Database\NIST11.L

Quality : 91

ID : Isopropyl isothiocyanate

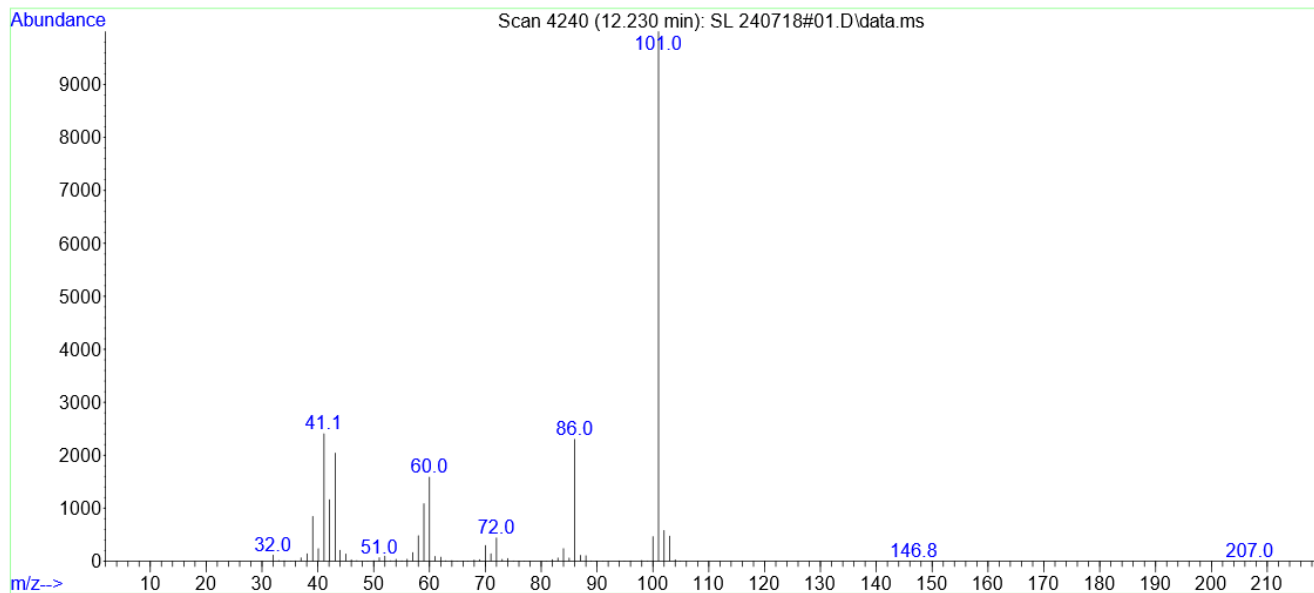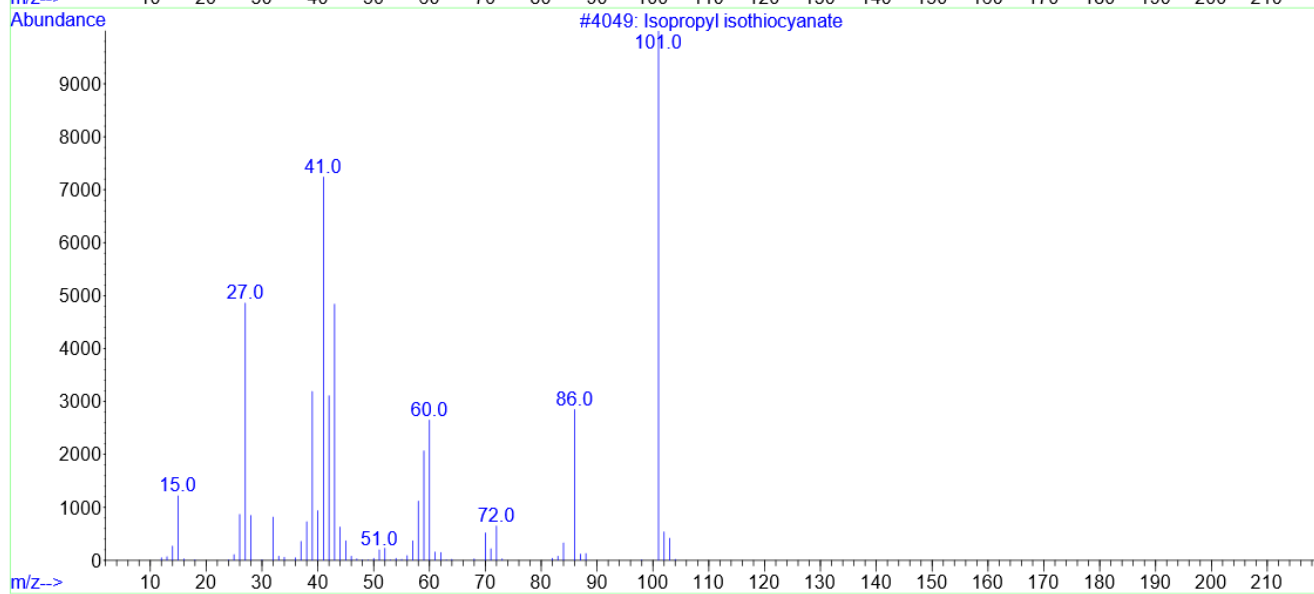

#### 4. Allyl thiocyanate

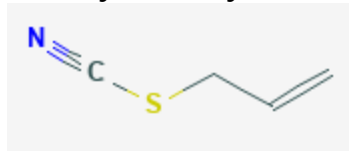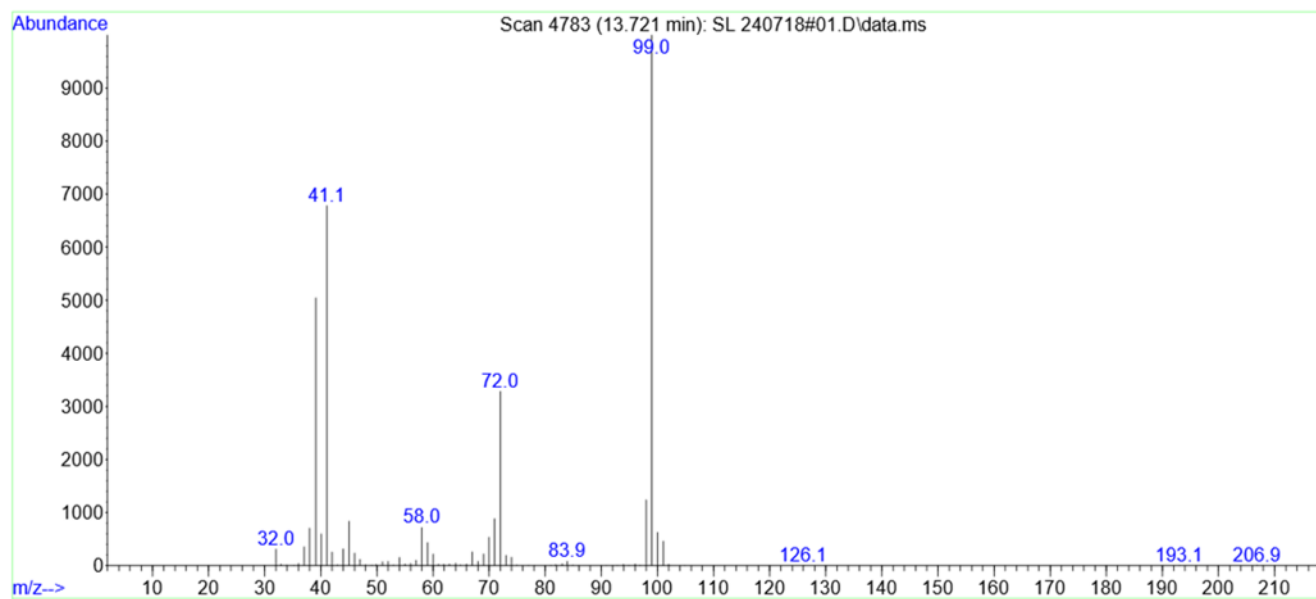



## 5. Allyl isothiocyanate (peak 1)

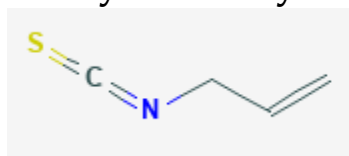

Library Searched : C:\Database\NIST11.L

Quality : 91

ID : Allyl Isothiocyanate

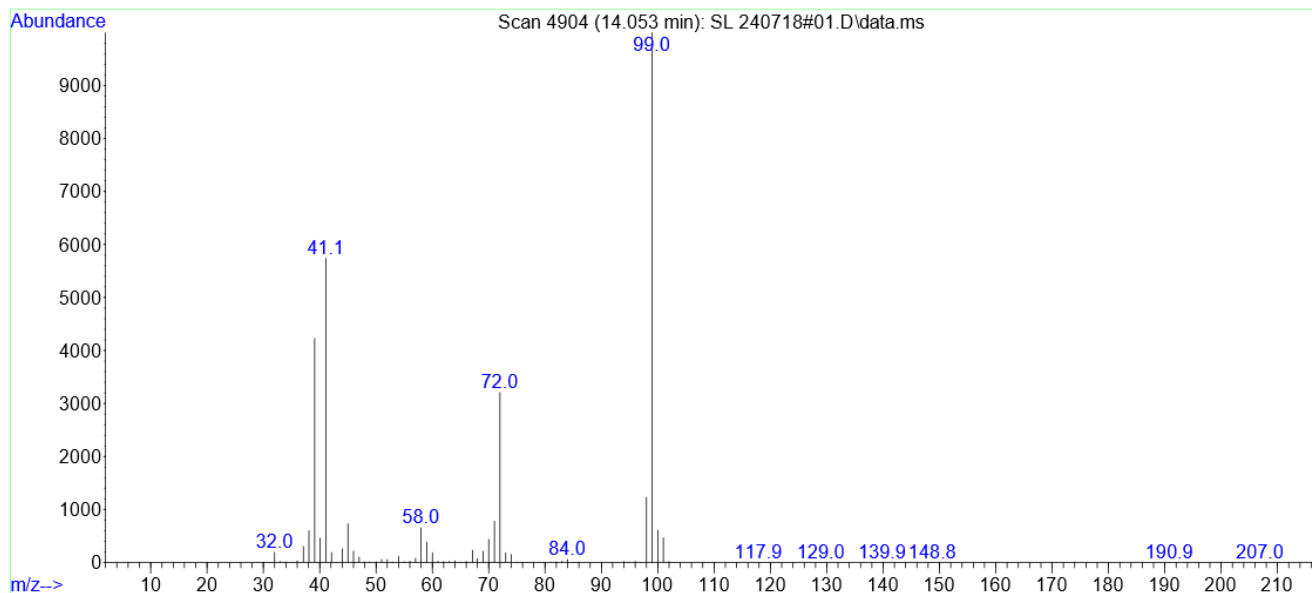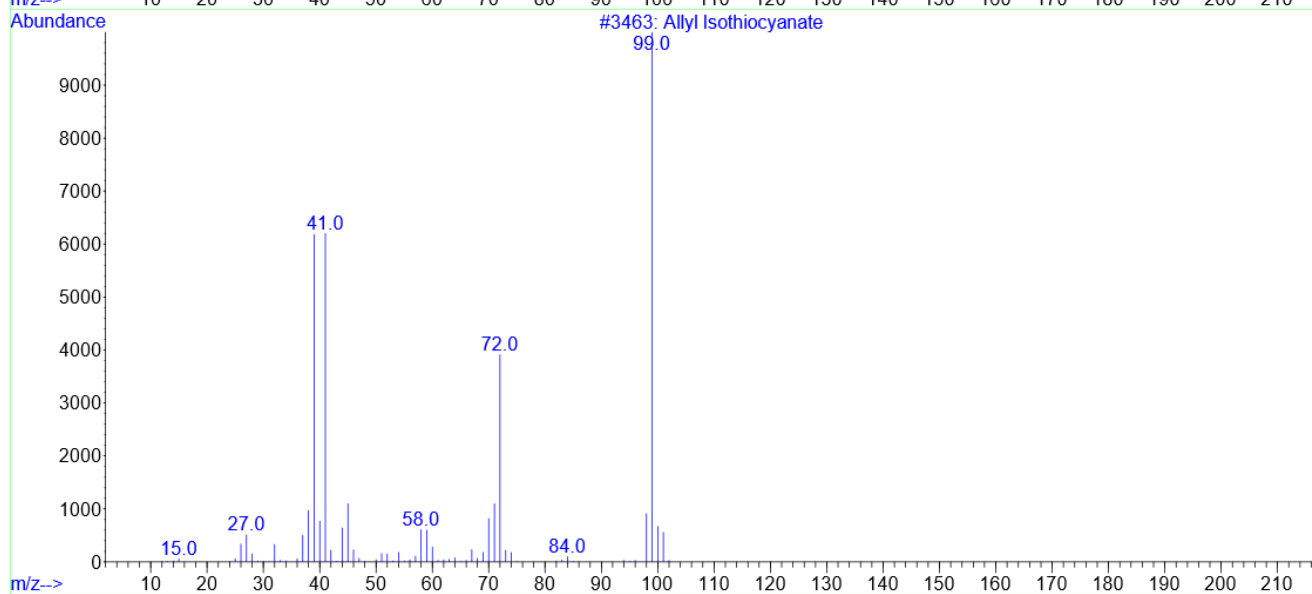

## 6. Allyl isothiocyanate (peak 2)



Library Searched : C:\Database\NIST11.L

Quality : 94

ID : Allyl Isothiocyanate

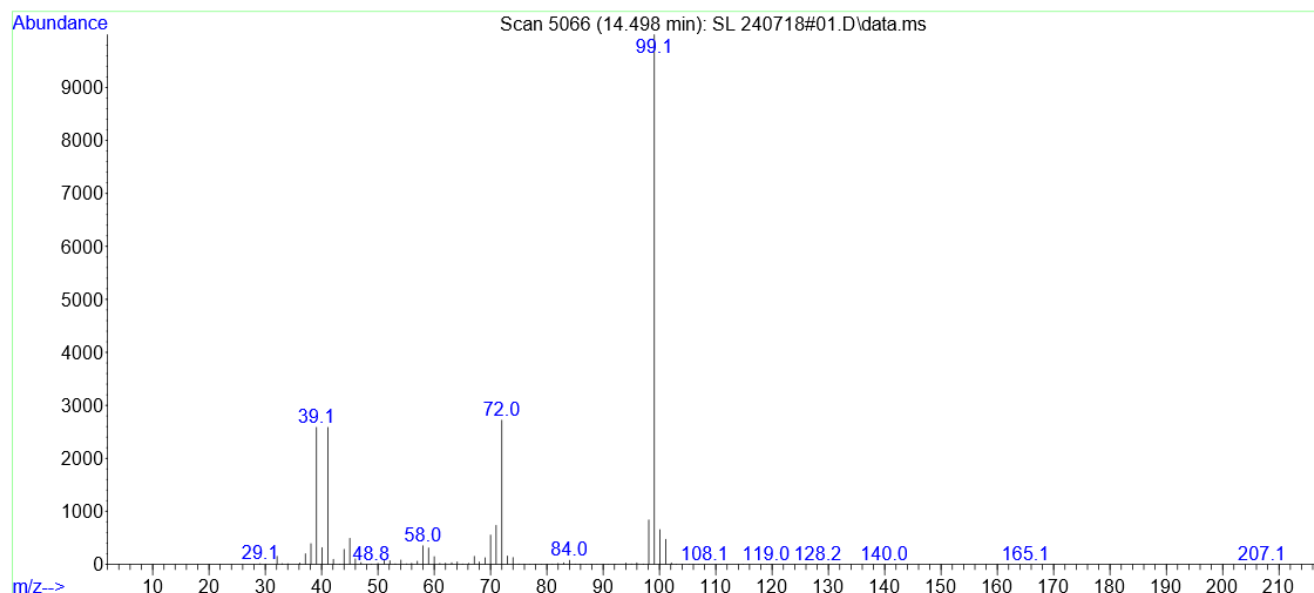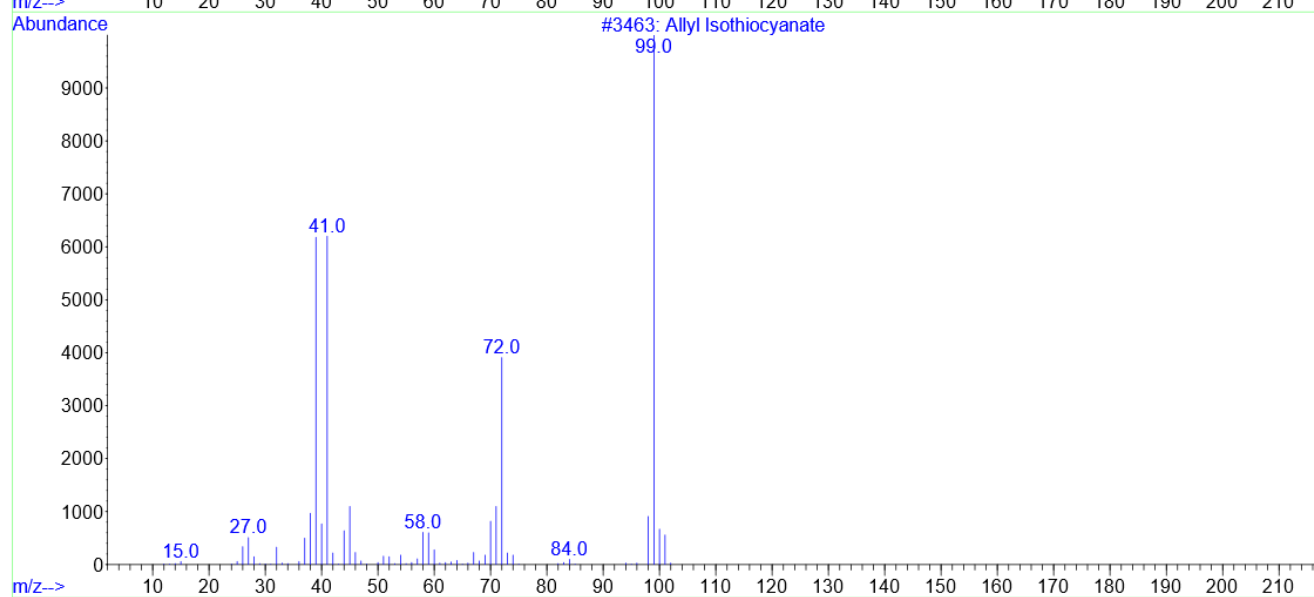

## 7. Cyclopropane isothiocyanate

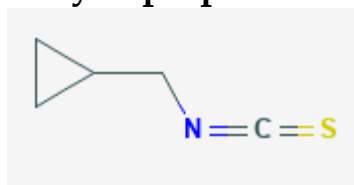

Library Searched : C:\Database\NIST11.L  
Quality : 80  
ID : Cyclopropane, isothiocyanato-

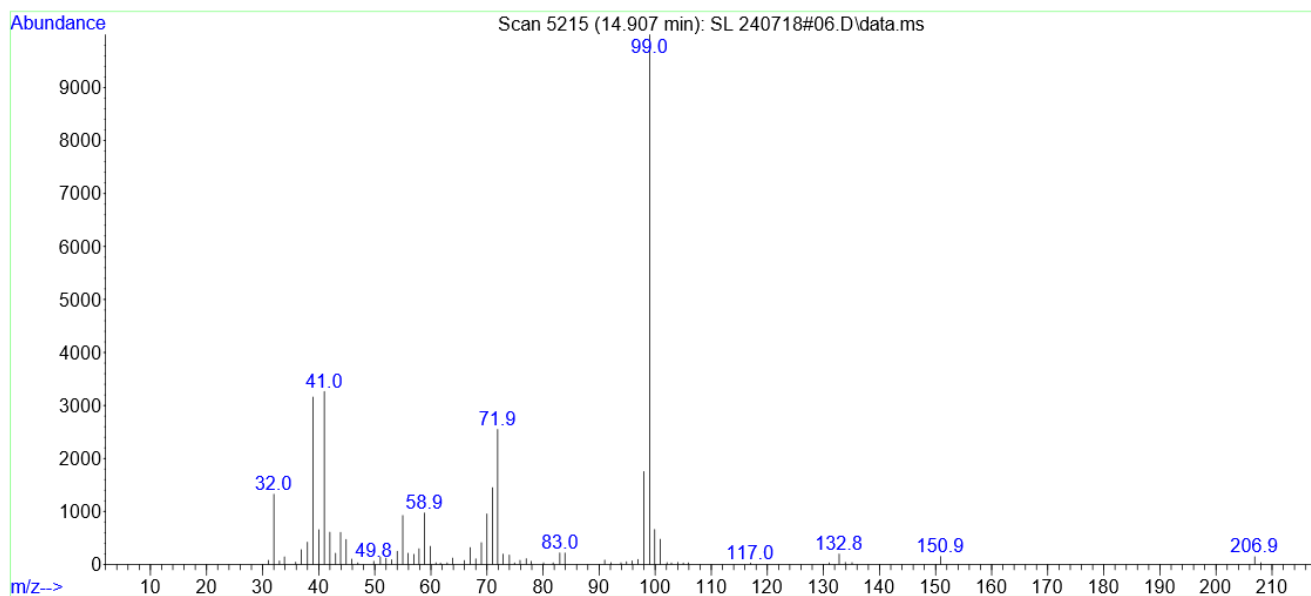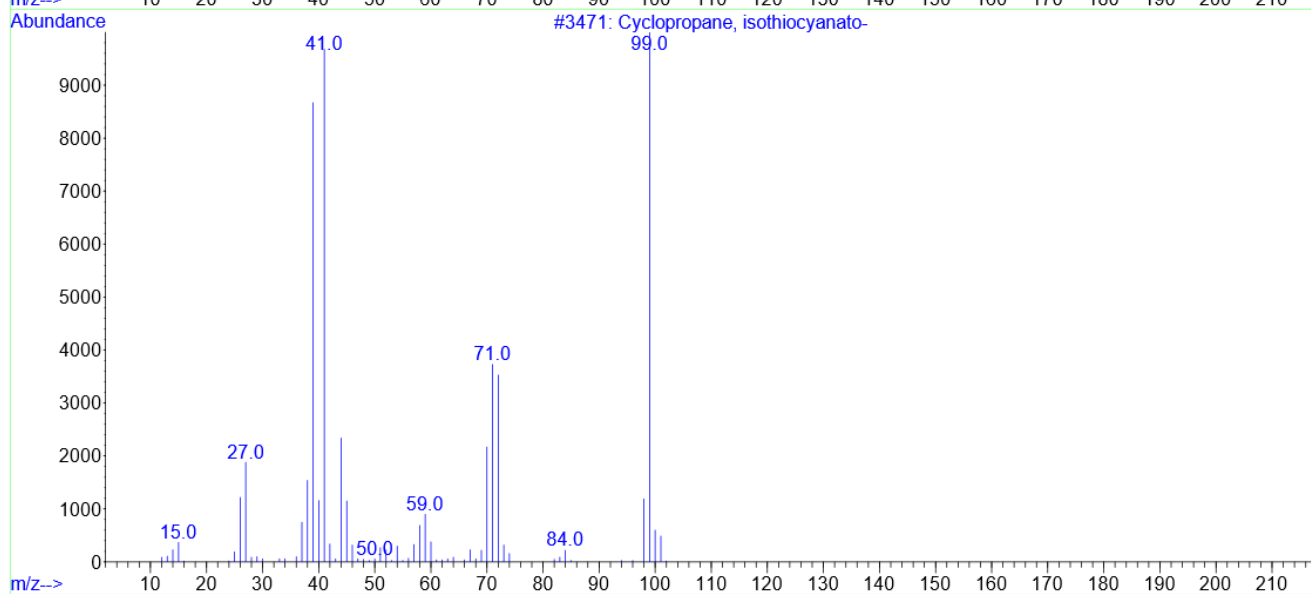

## 8. Cyclopentyl-1-thiaethane

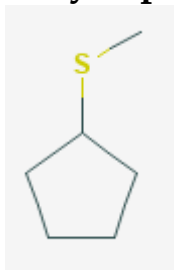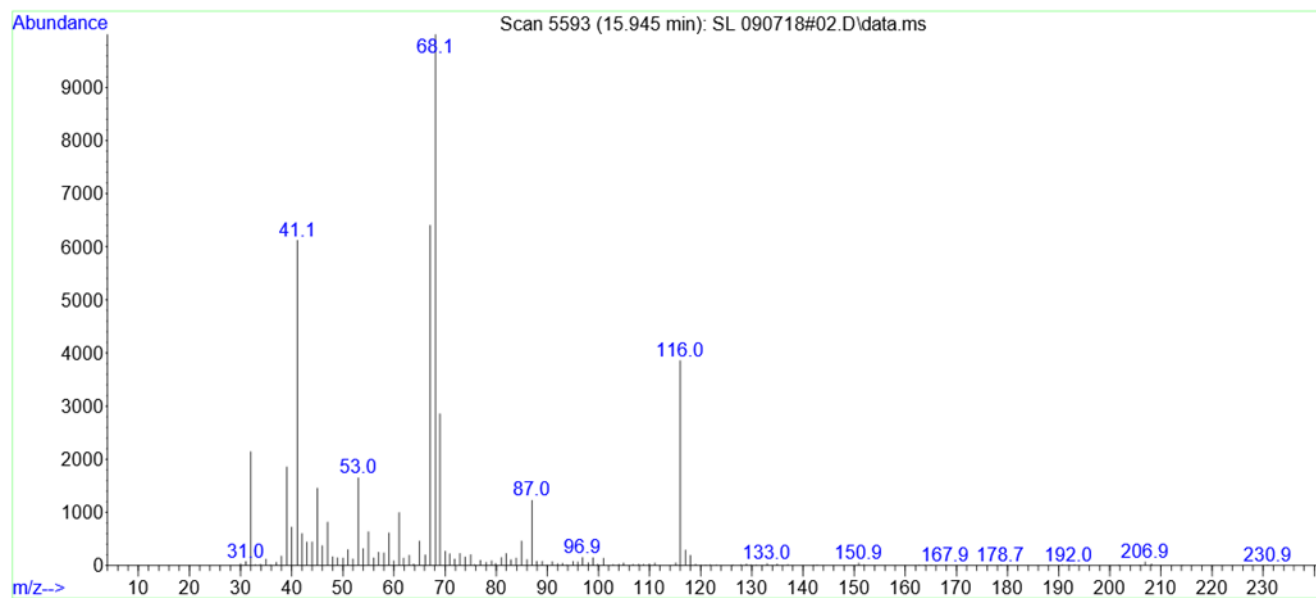

## 9. Sec-butyl isothiocyanate

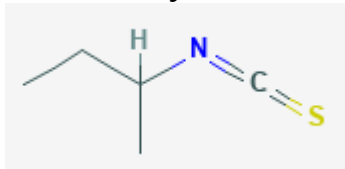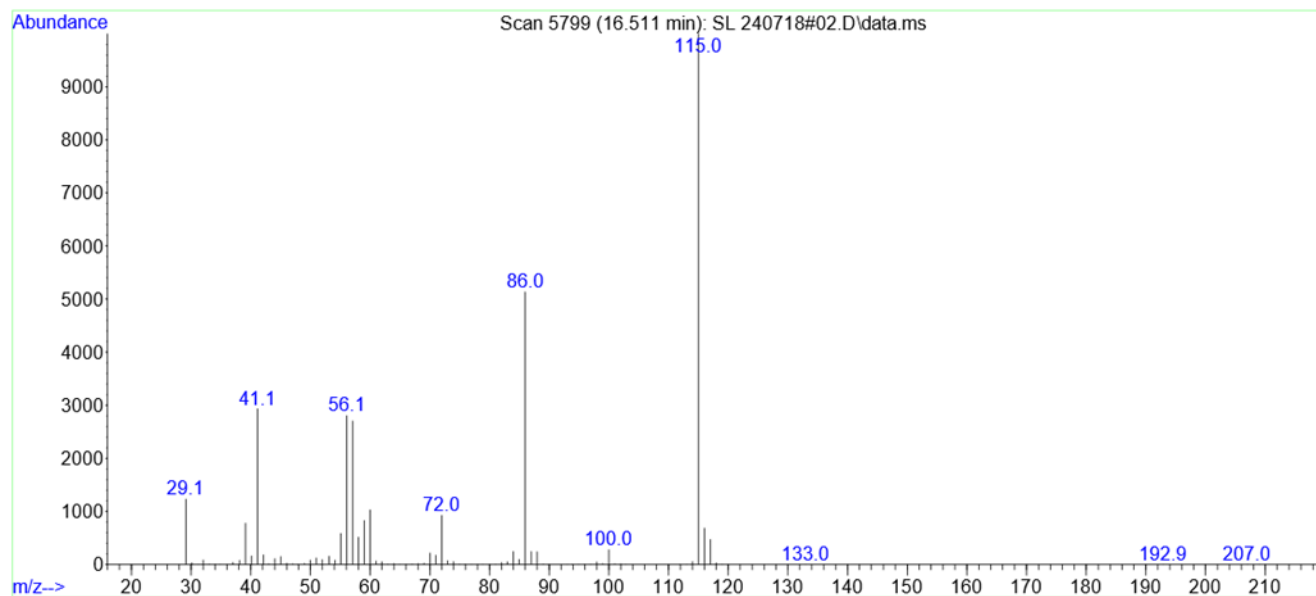

## 10. Isobutyl isothiocyanate

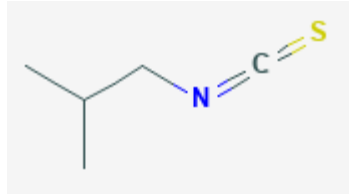

Library Searched : C:\Database\NIST11.L

Quality : 91

ID : Isobutyl isothiocyanate

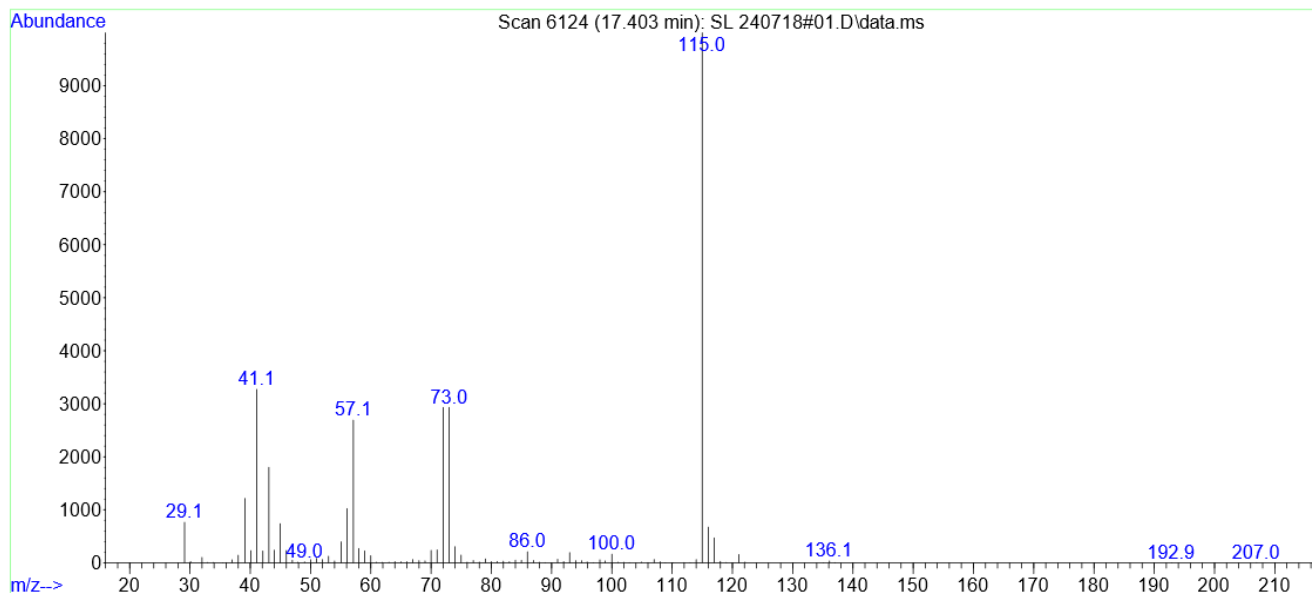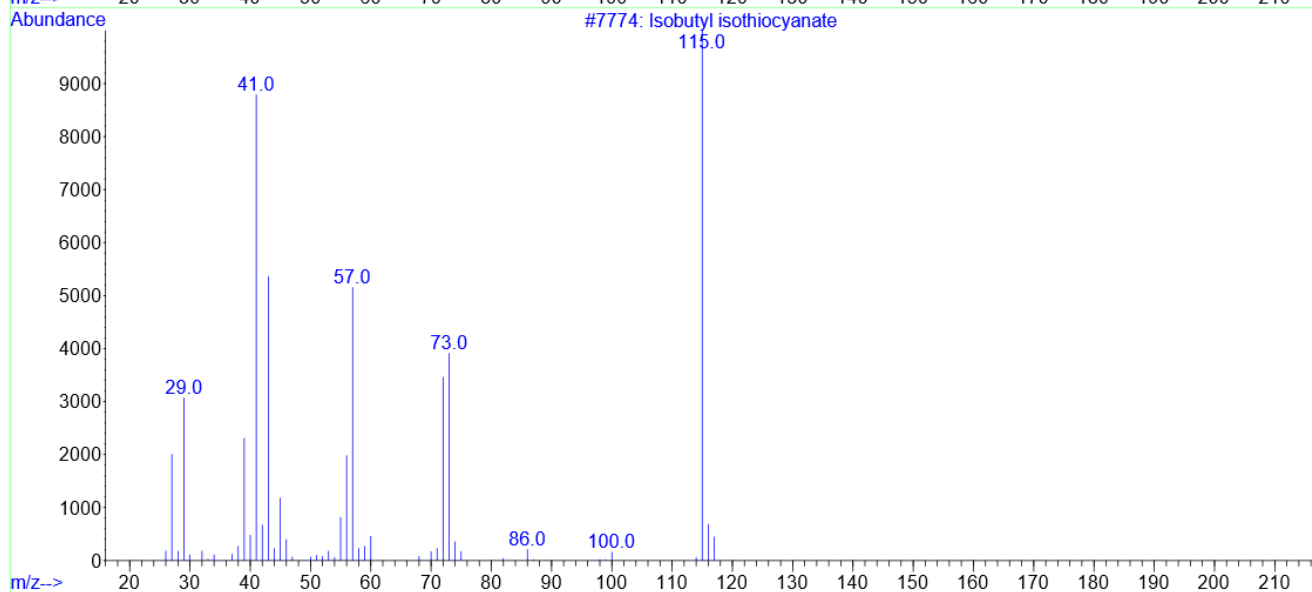

## 11. 3-butenyl isothiocyanate

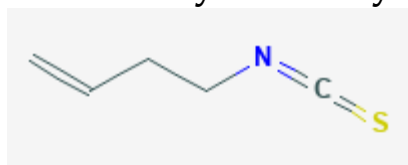

Library Searched : C:\Database\NIST11.L

Quality : 87

ID : 1-Butene, 4-isothiocyanato-

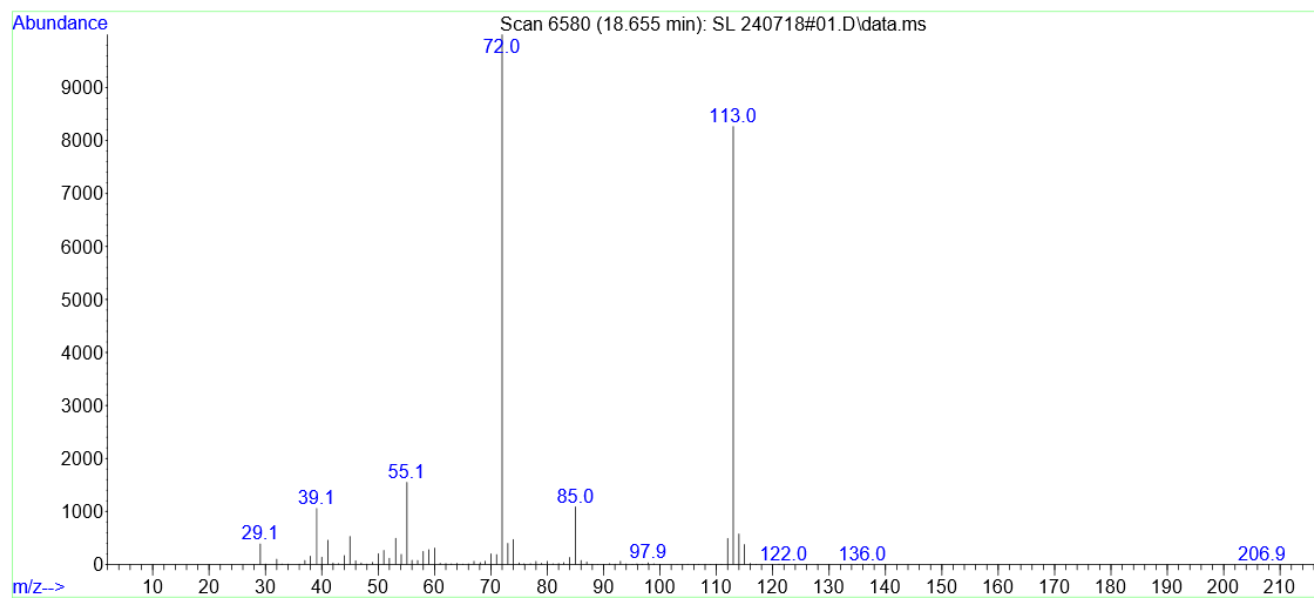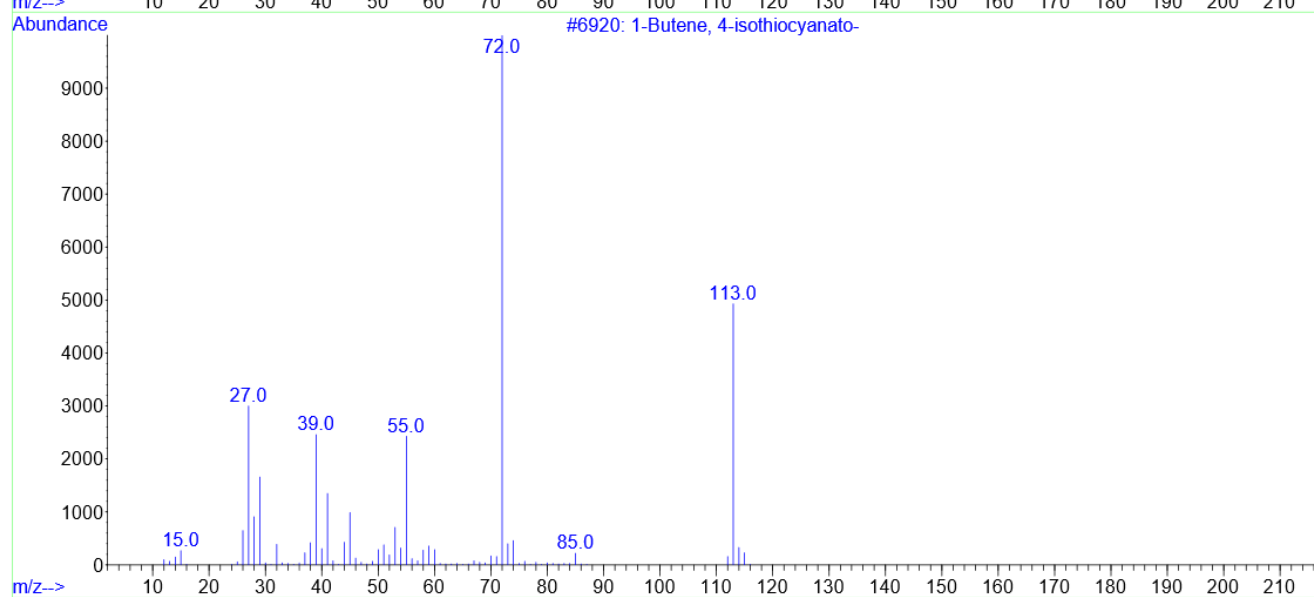

## 12. Butyl isothiocyanate

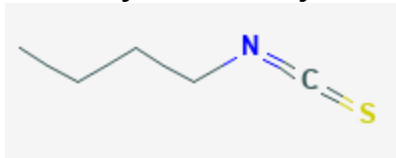

Library Searched : C:\Database\NIST11.L

Quality : 94

ID : Butane, 1-isothiocyanato-

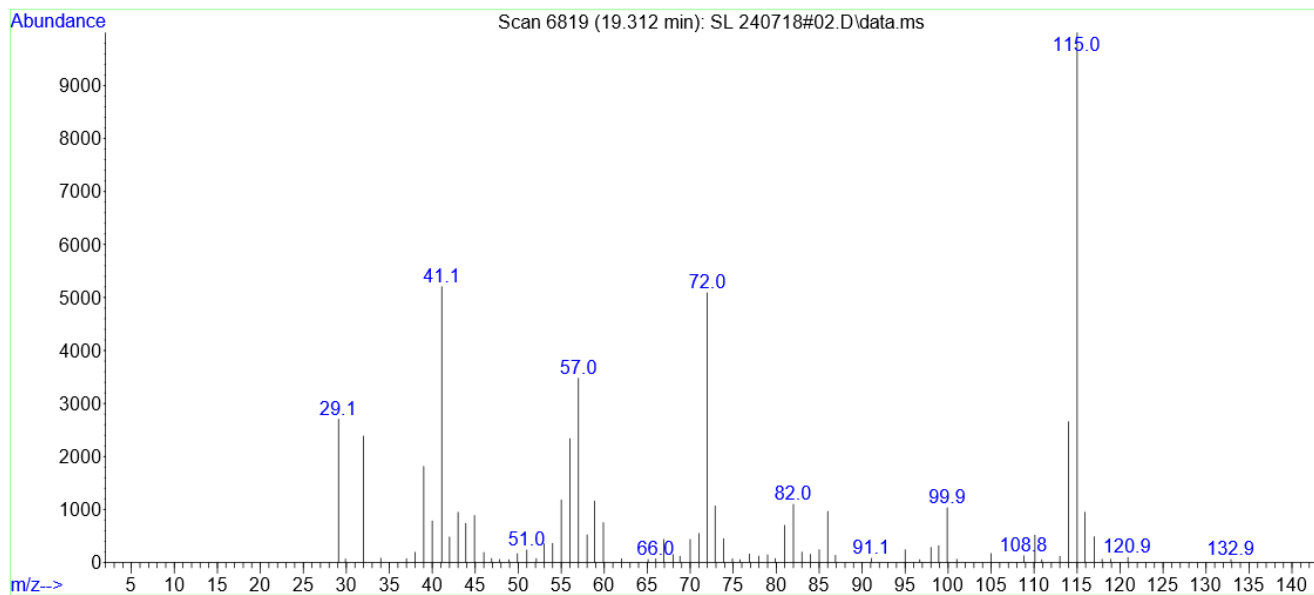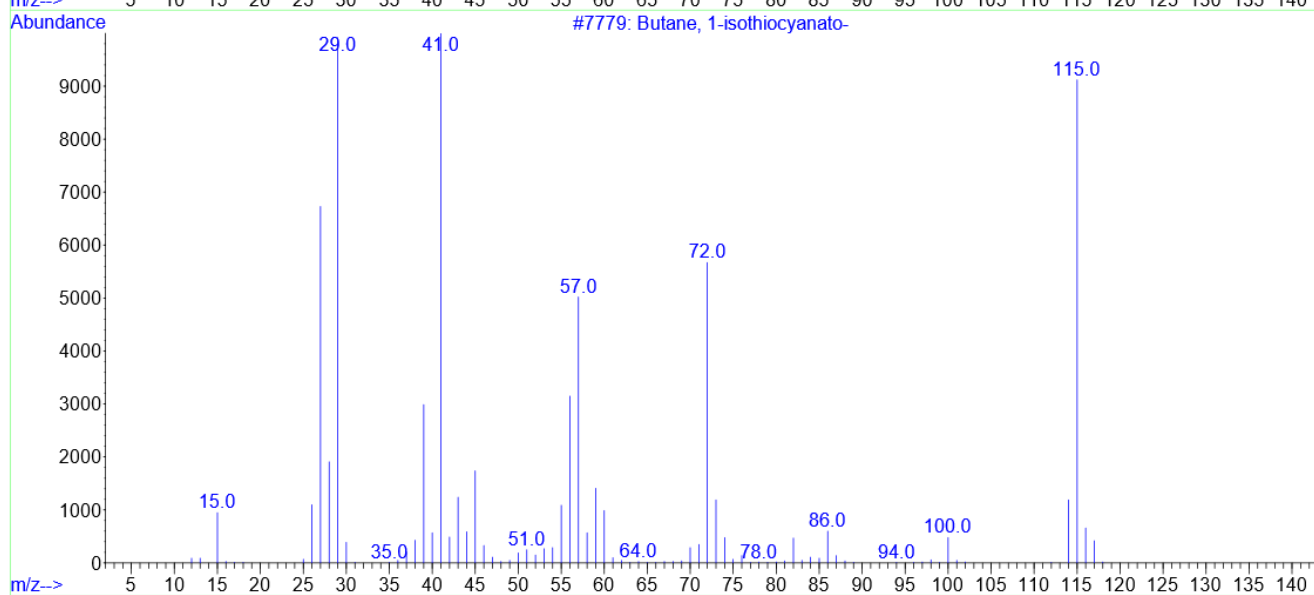

### 13. Isoamyl isothiocyanate

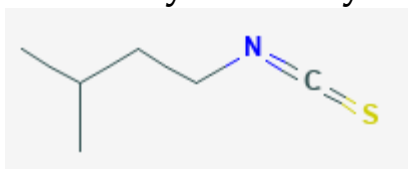

Library Searched : C:\Database\NIST11.L

Quality : 87

ID : Butane, 1-isothiocyanato-3-methyl-

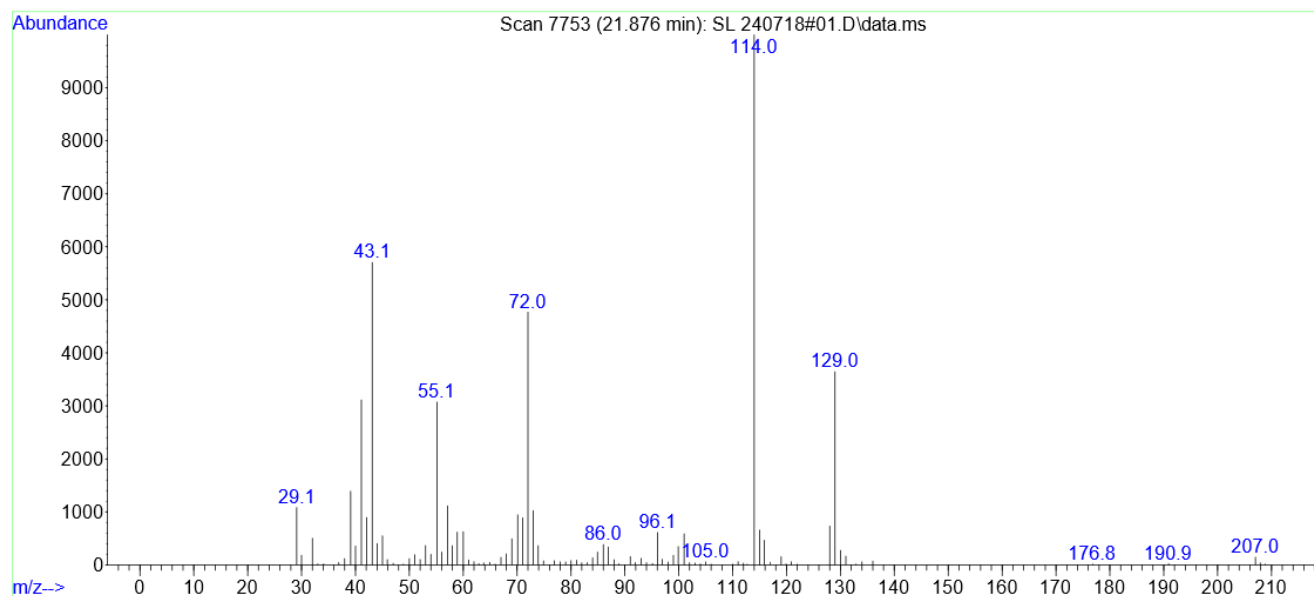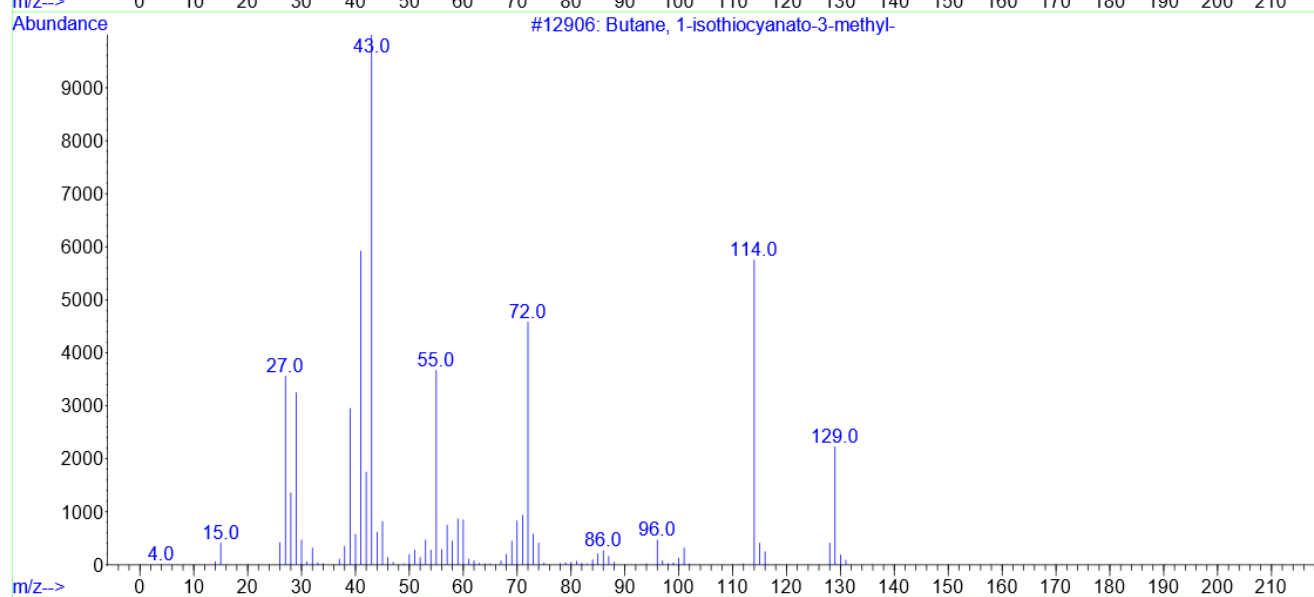



## 14. 4-pentenyl isothiocyanate

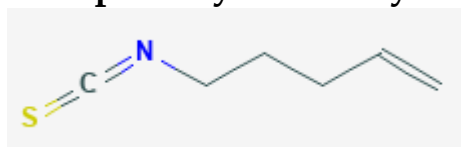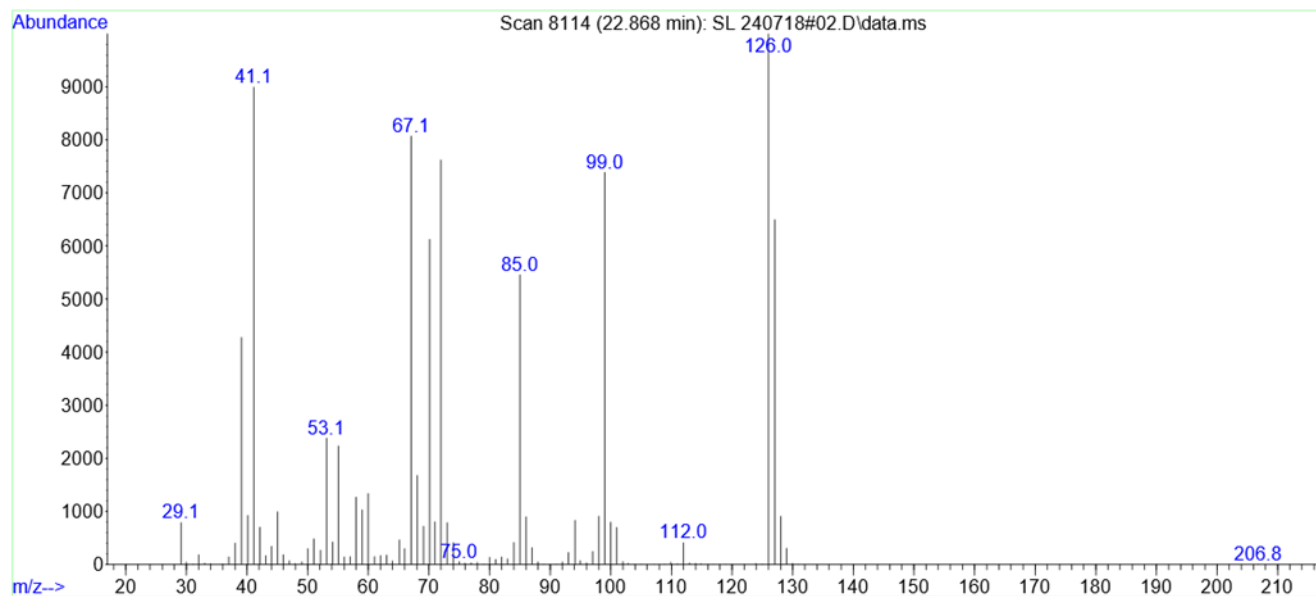

## 15. Pentyl isothiocyanate

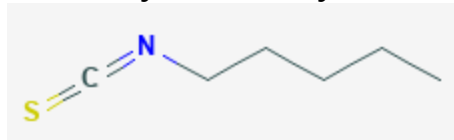

Library Searched : C:\Database\NIST11.L

Quality : 94

ID : n-Pentyl isothiocyanate

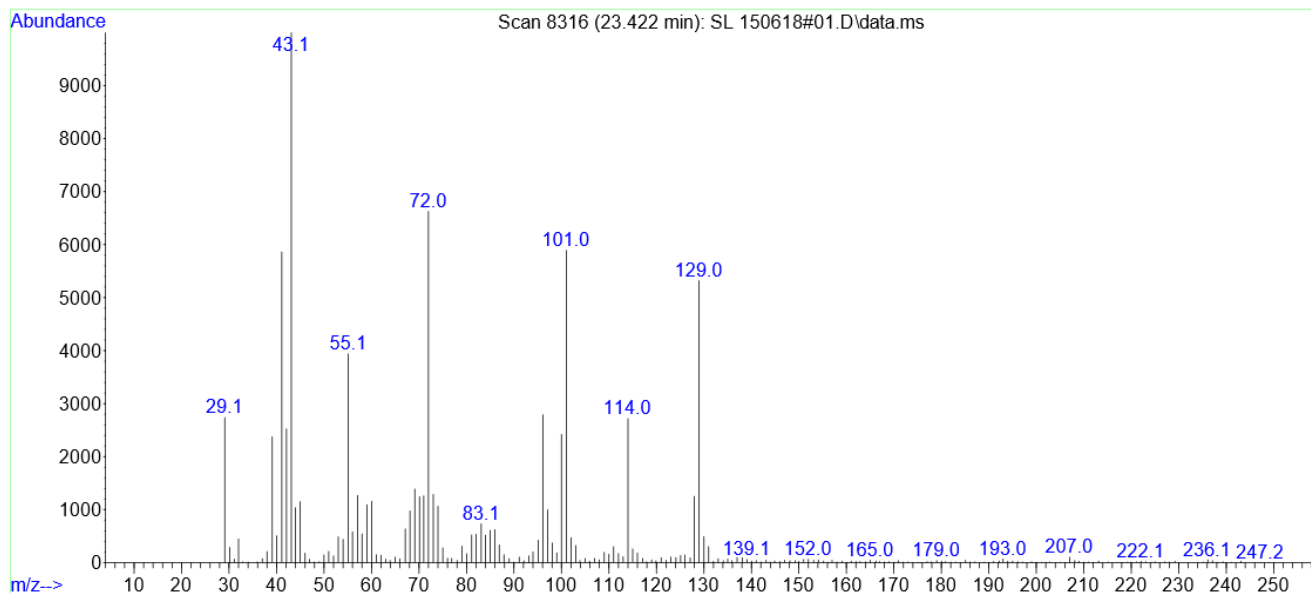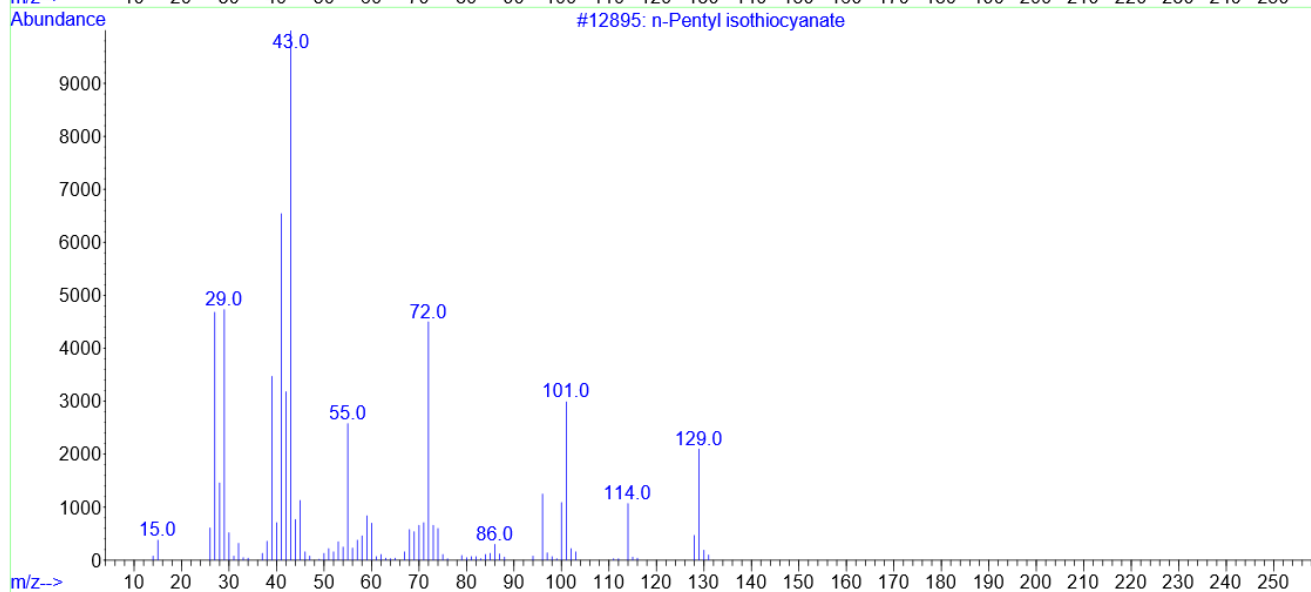

## 16. 1-isothiocyanato-4-methylpentane

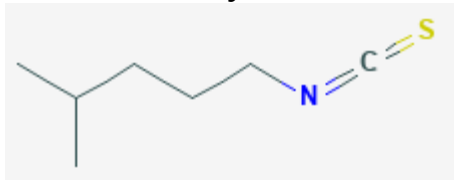

Library Searched : C:\Database\NIST11.L  
Quality : 91  
ID : 4-Methylpentyl isothiocyanate

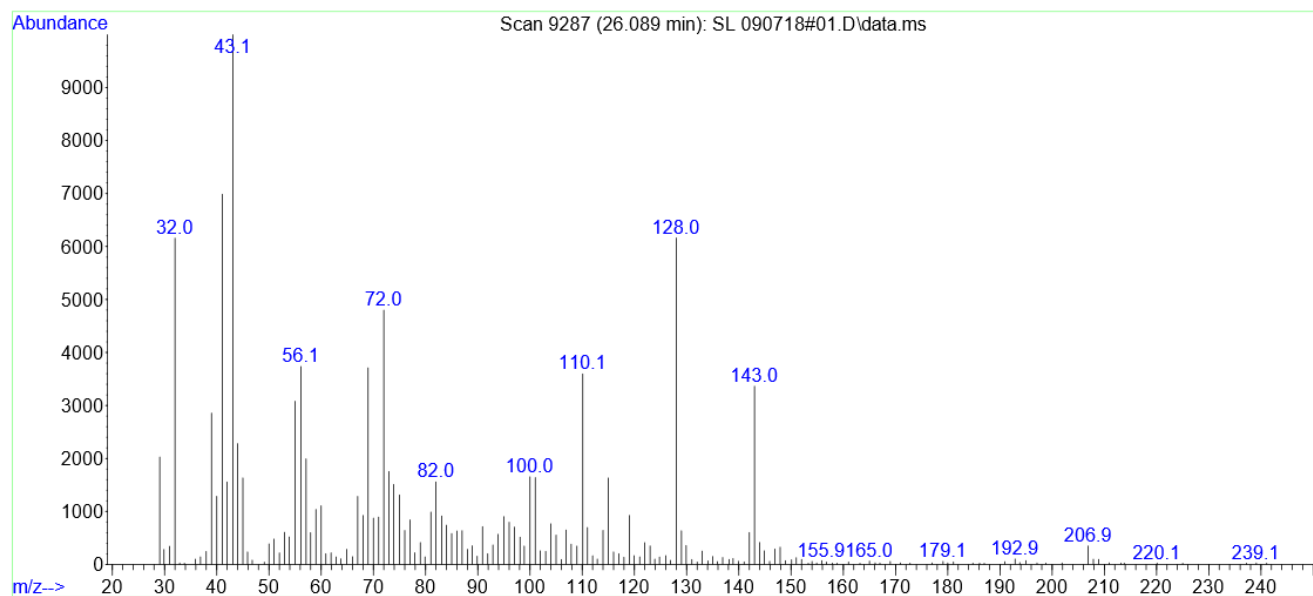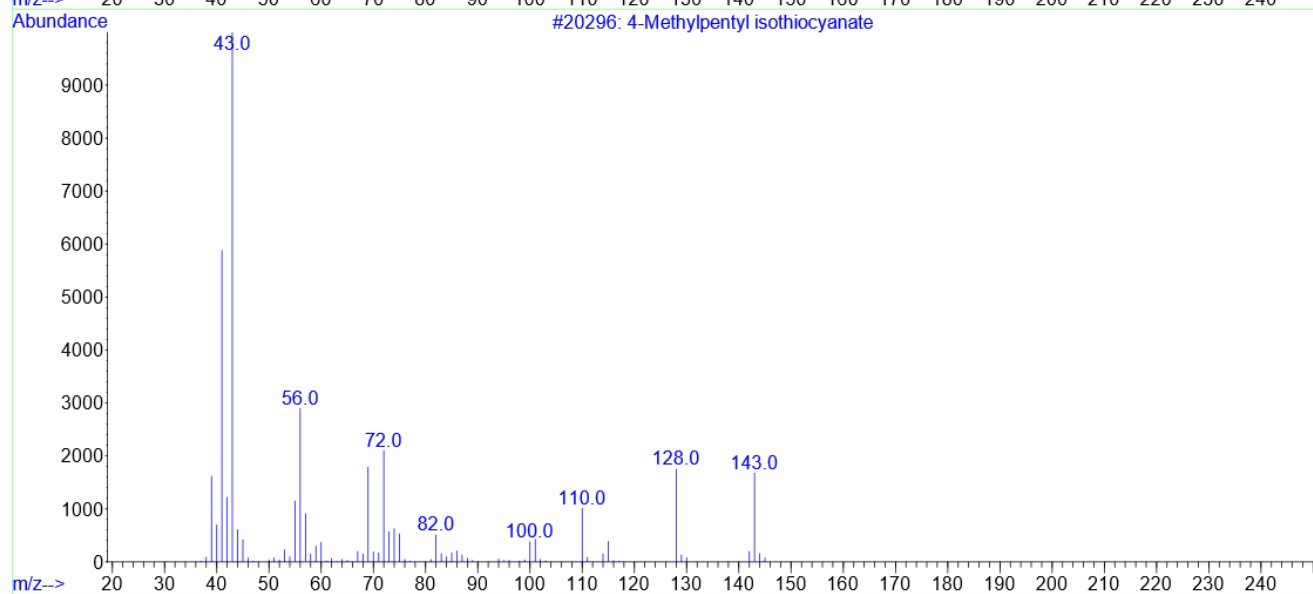

## 17. Cyclohexyl isothiocyanate

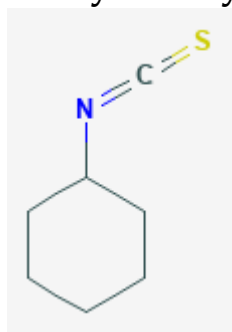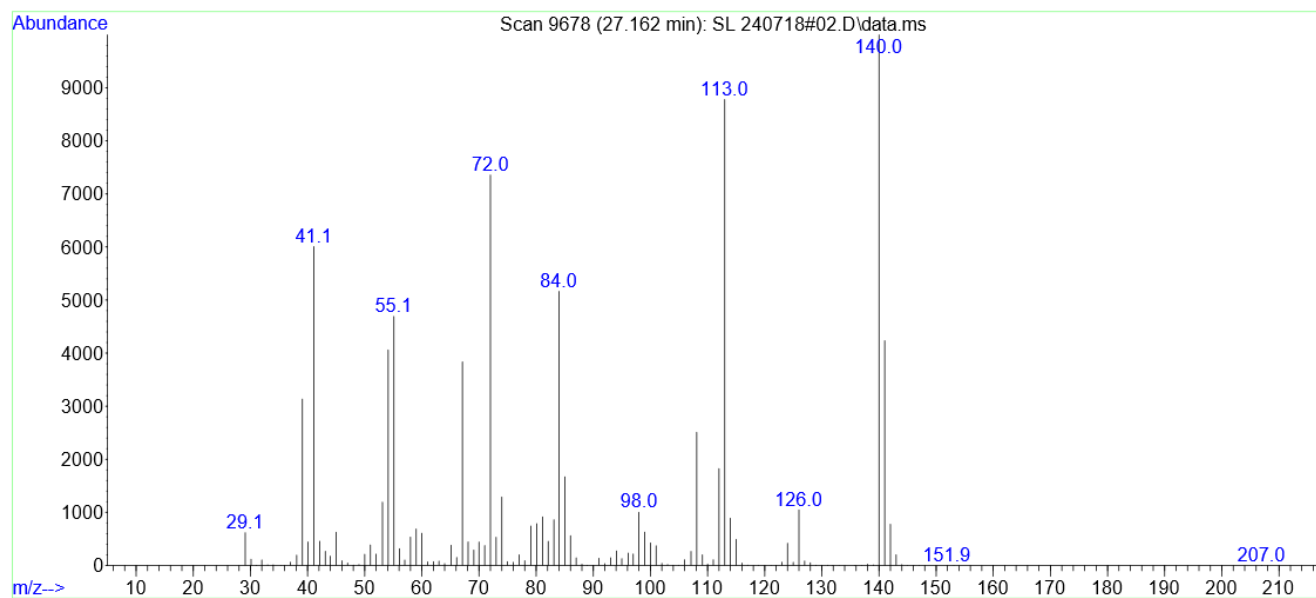

## 19. Iberverin

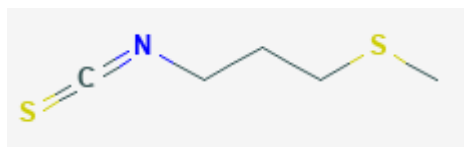

Library Searched : C:\Database\NIST11.L

Quality : 83

ID : Propane, 1-isothiocyanato-3-(methylthio)-

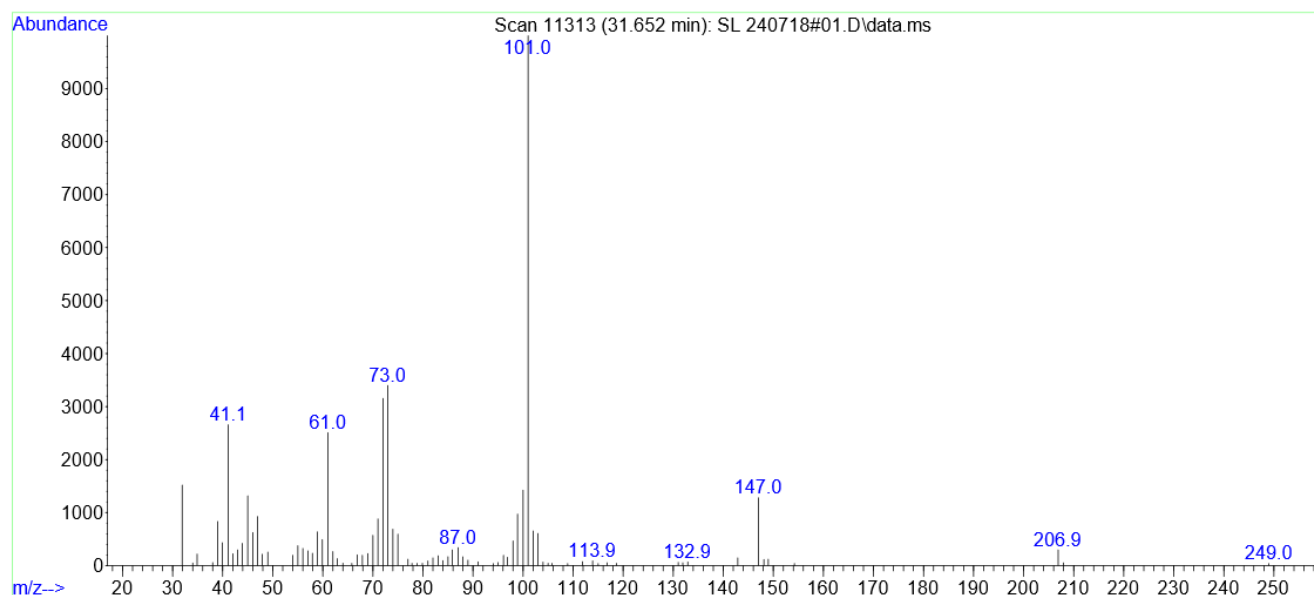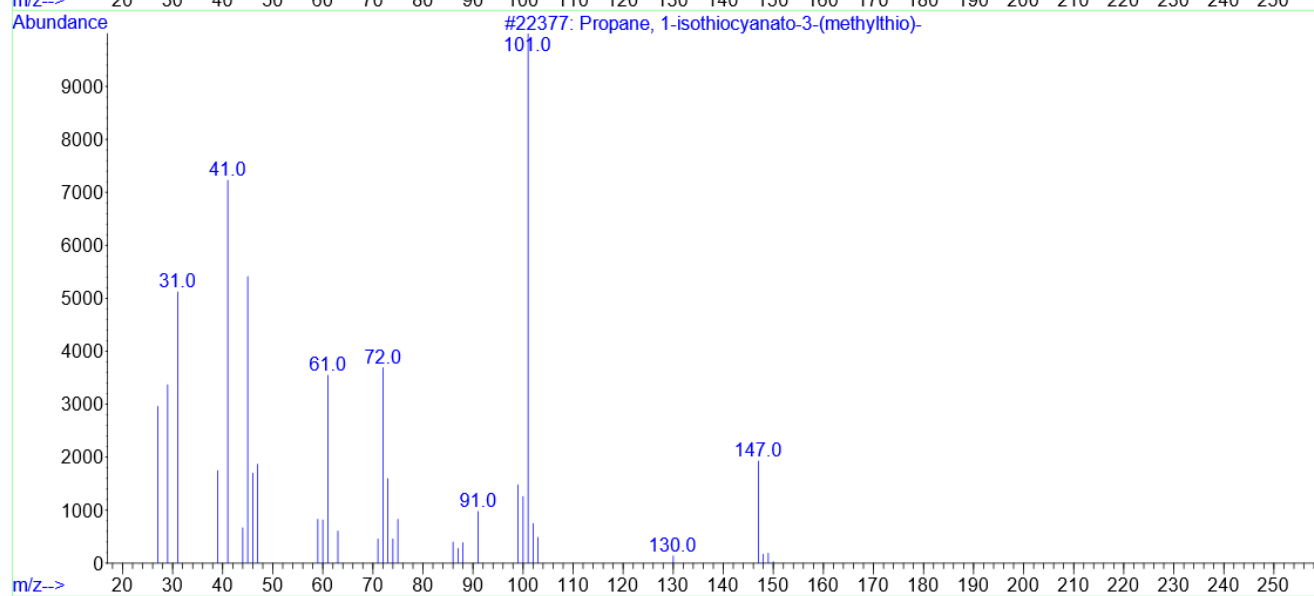

## 20. Sativin

N.B. It is unknown if this is the ITC or tautomer rearrangement of this compound.

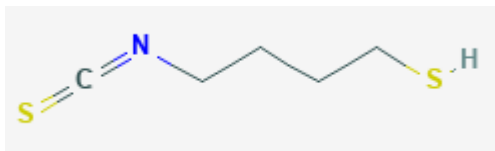

or

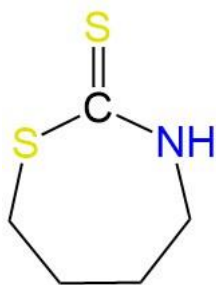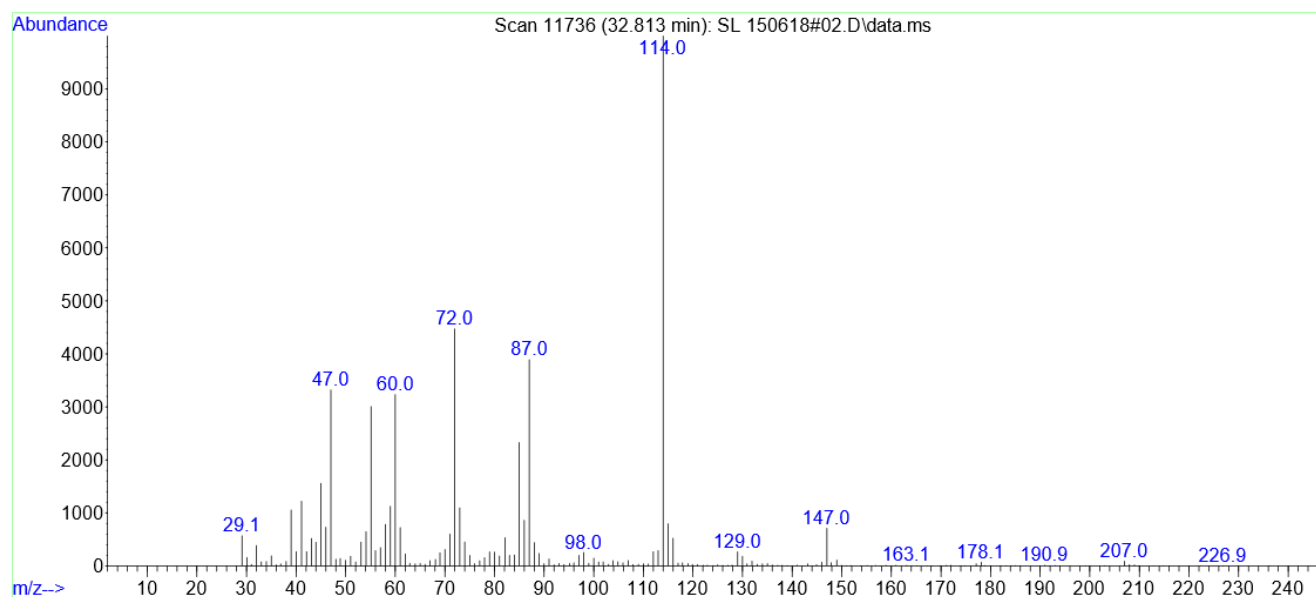

## 21. Octyl isothiocyanate

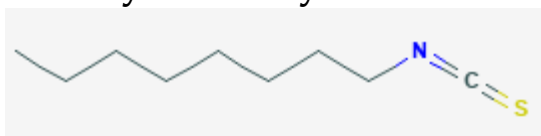

Library Searched : C:\Database\NIST11.L  
Quality : 53  
ID : Octane, 1-isothiocyanato-

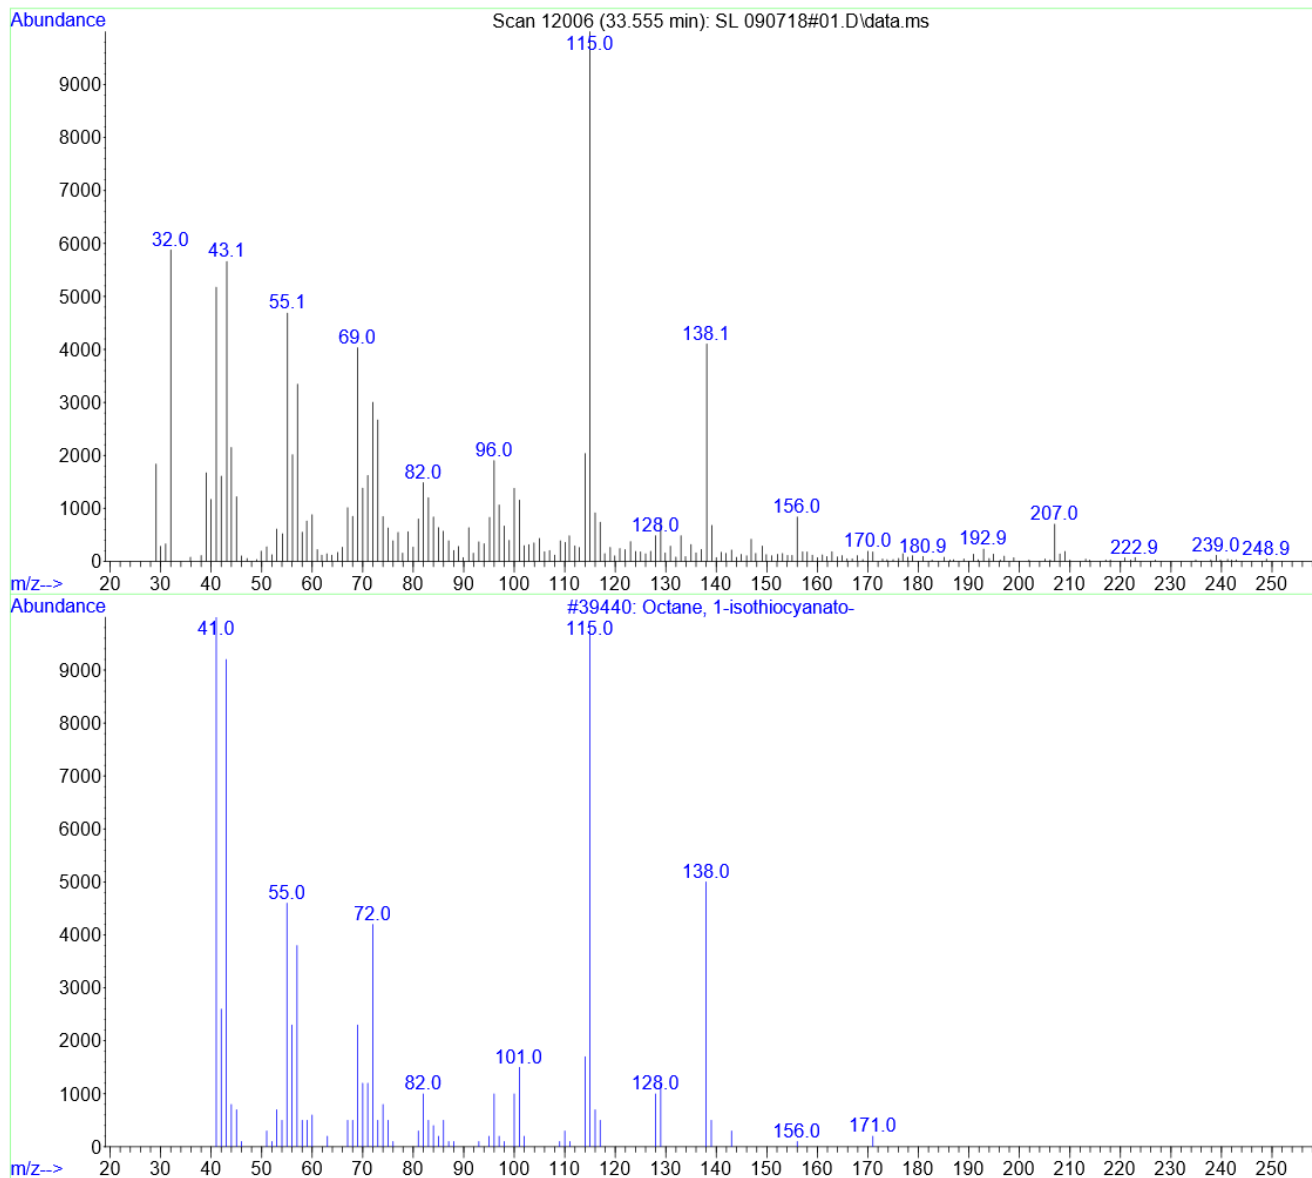

## 22. Benzyl isothiocyanate

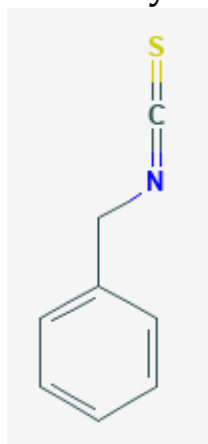

Library Searched : C:\Database\NIST11.L

Quality : 91

ID : Benzene, (isothiocyanatomethyl)-

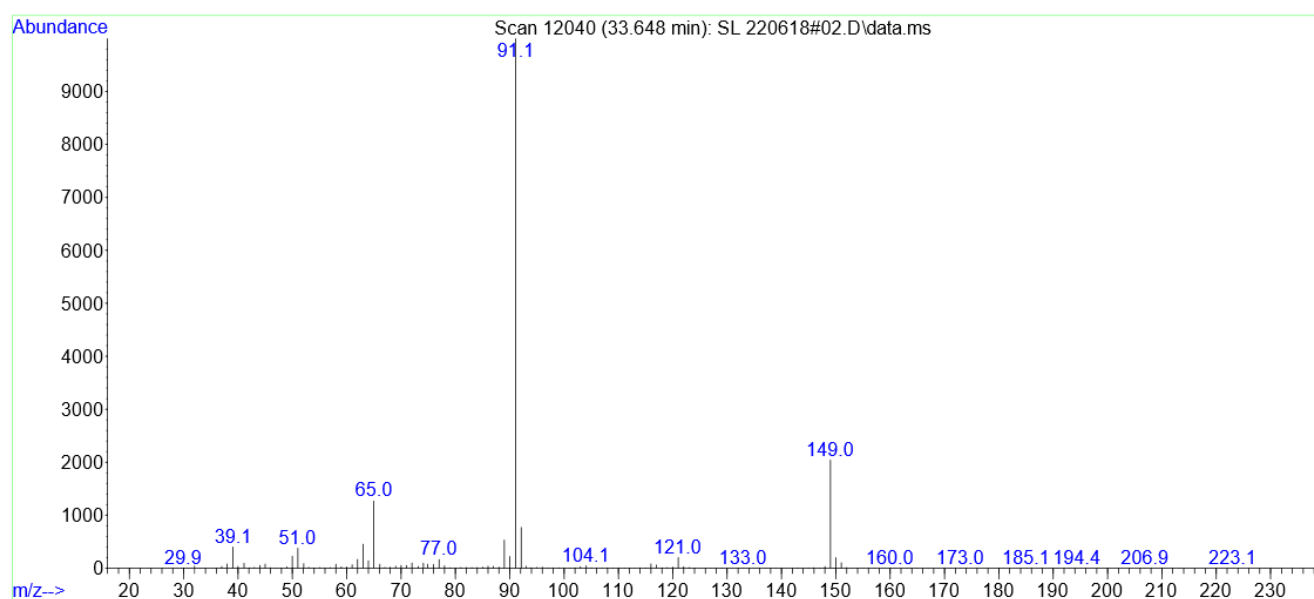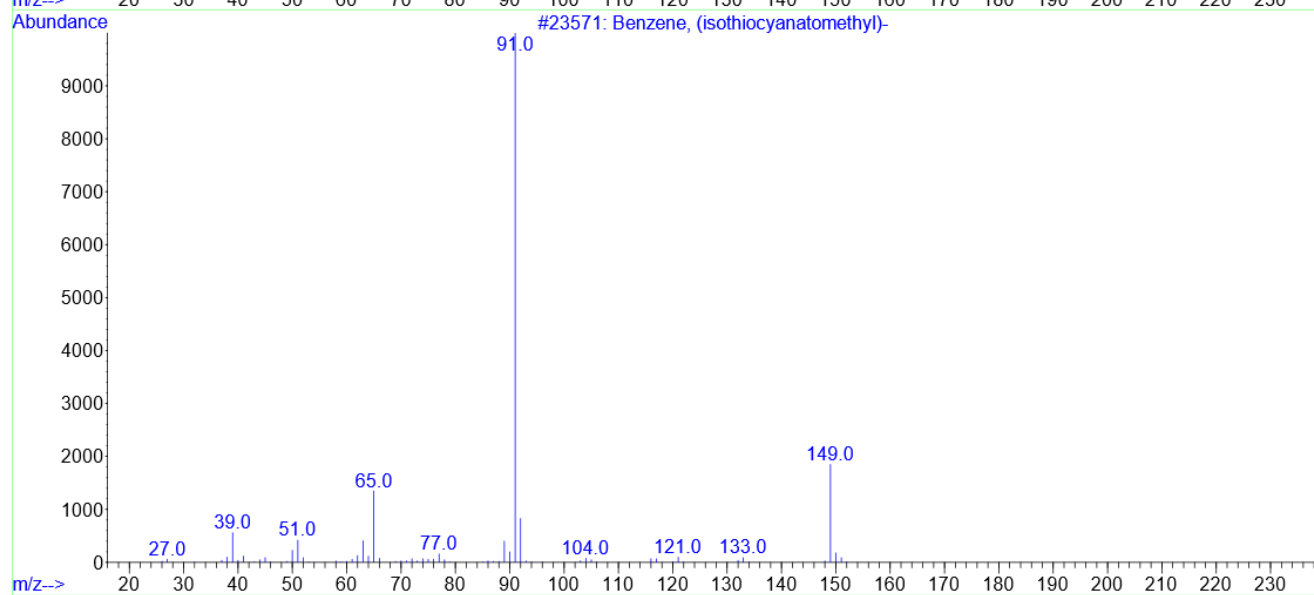



## 23. Erucin

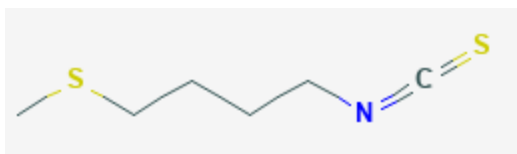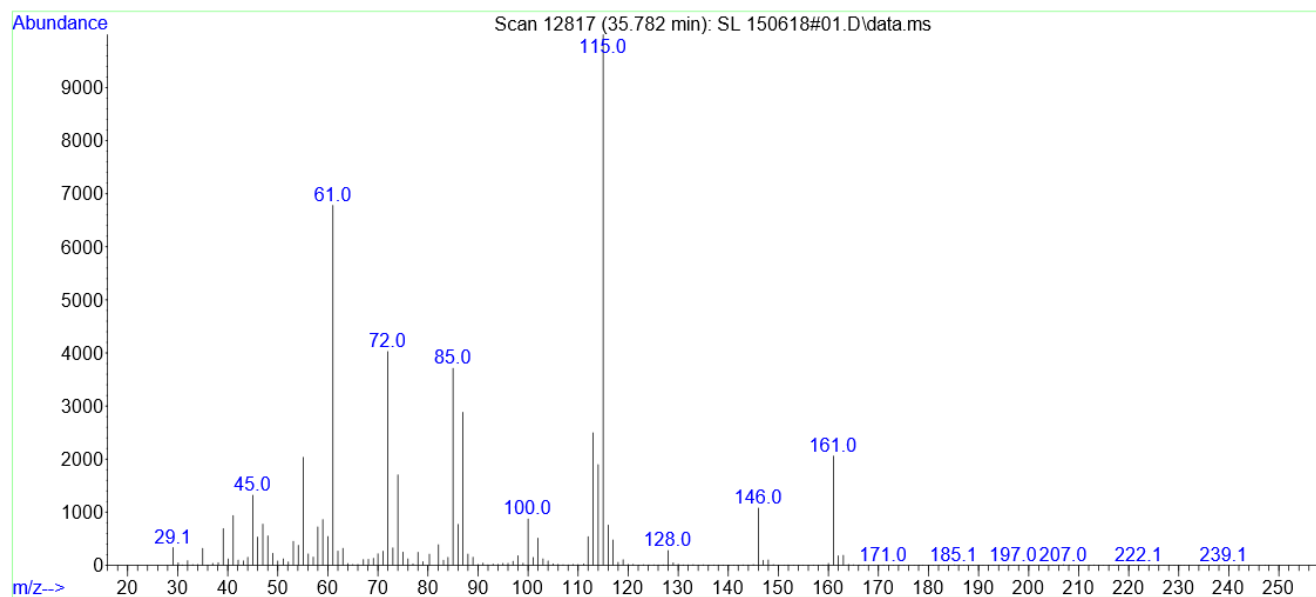

## 24. Phenethyl isothiocyanate

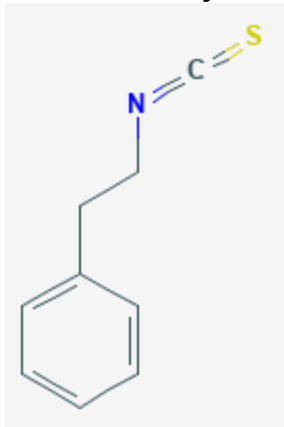

Library Searched : C:\Database\NIST11.L

Quality : 95

ID : Benzene, (2-isothiocyanatoethyl)-

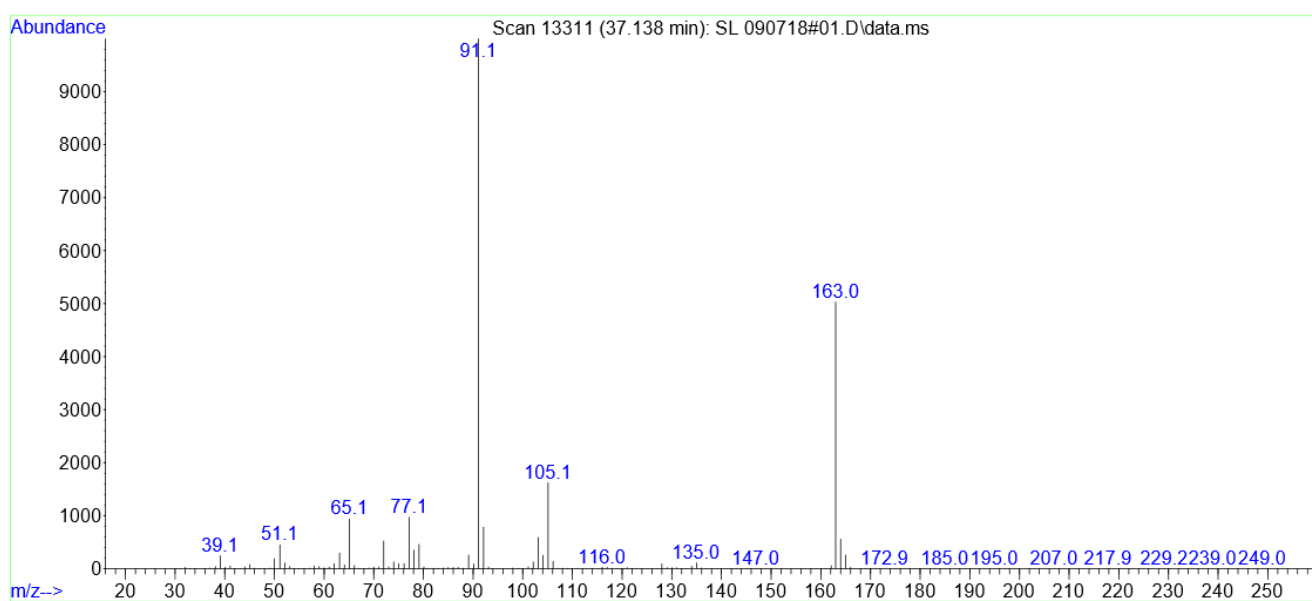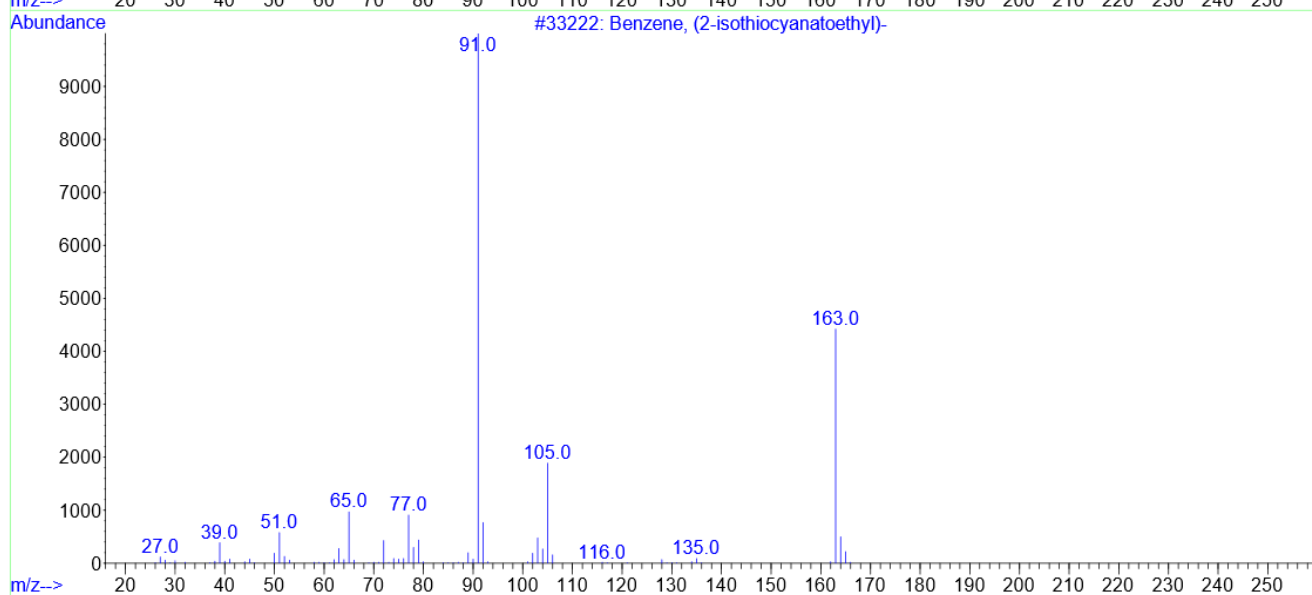

## 25. 1-penten-3-ol

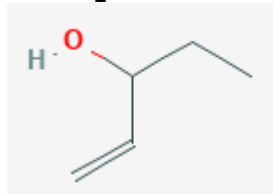

Library Searched : C:\Database\NIST11.L

Quality : 90

ID : 1-Penten-3-ol

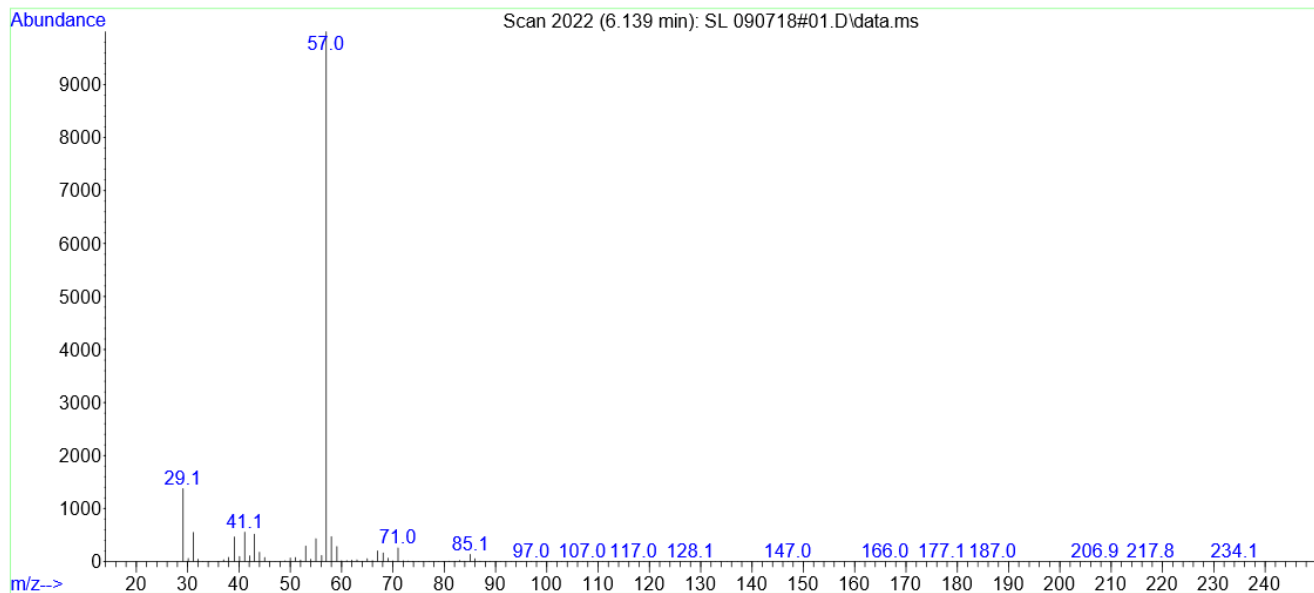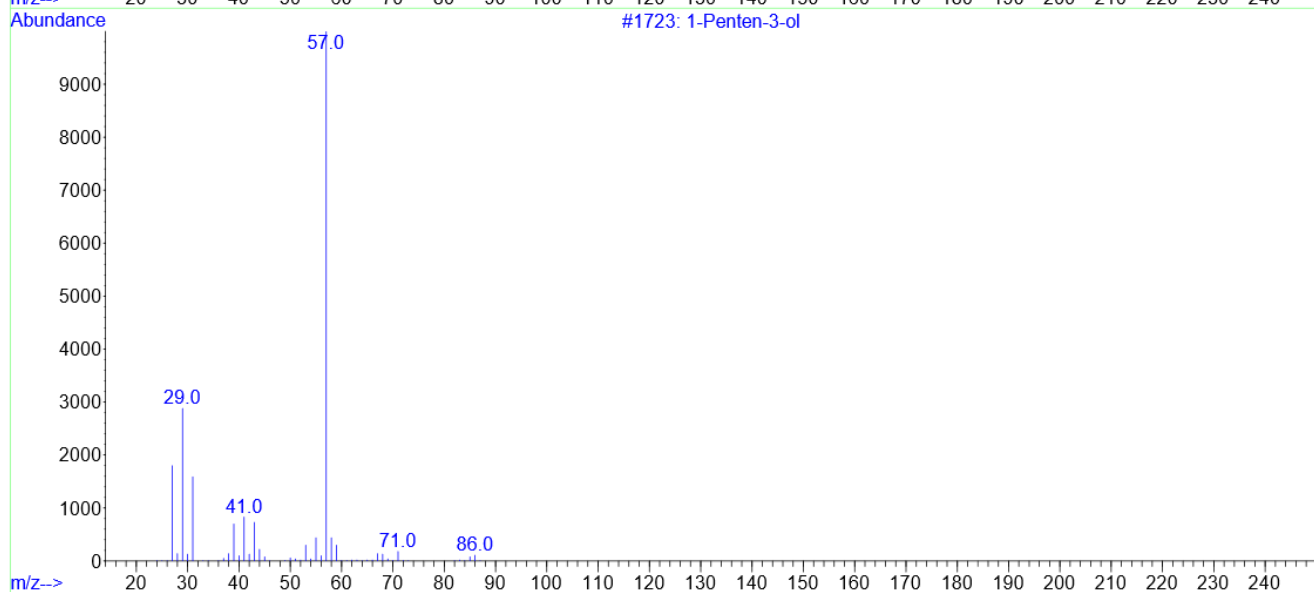

## 26. Pentan-1-ol

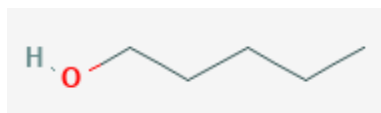

Library Searched : C:\Database\NIST11.L  
Quality : 47  
ID : 1-Pentanol

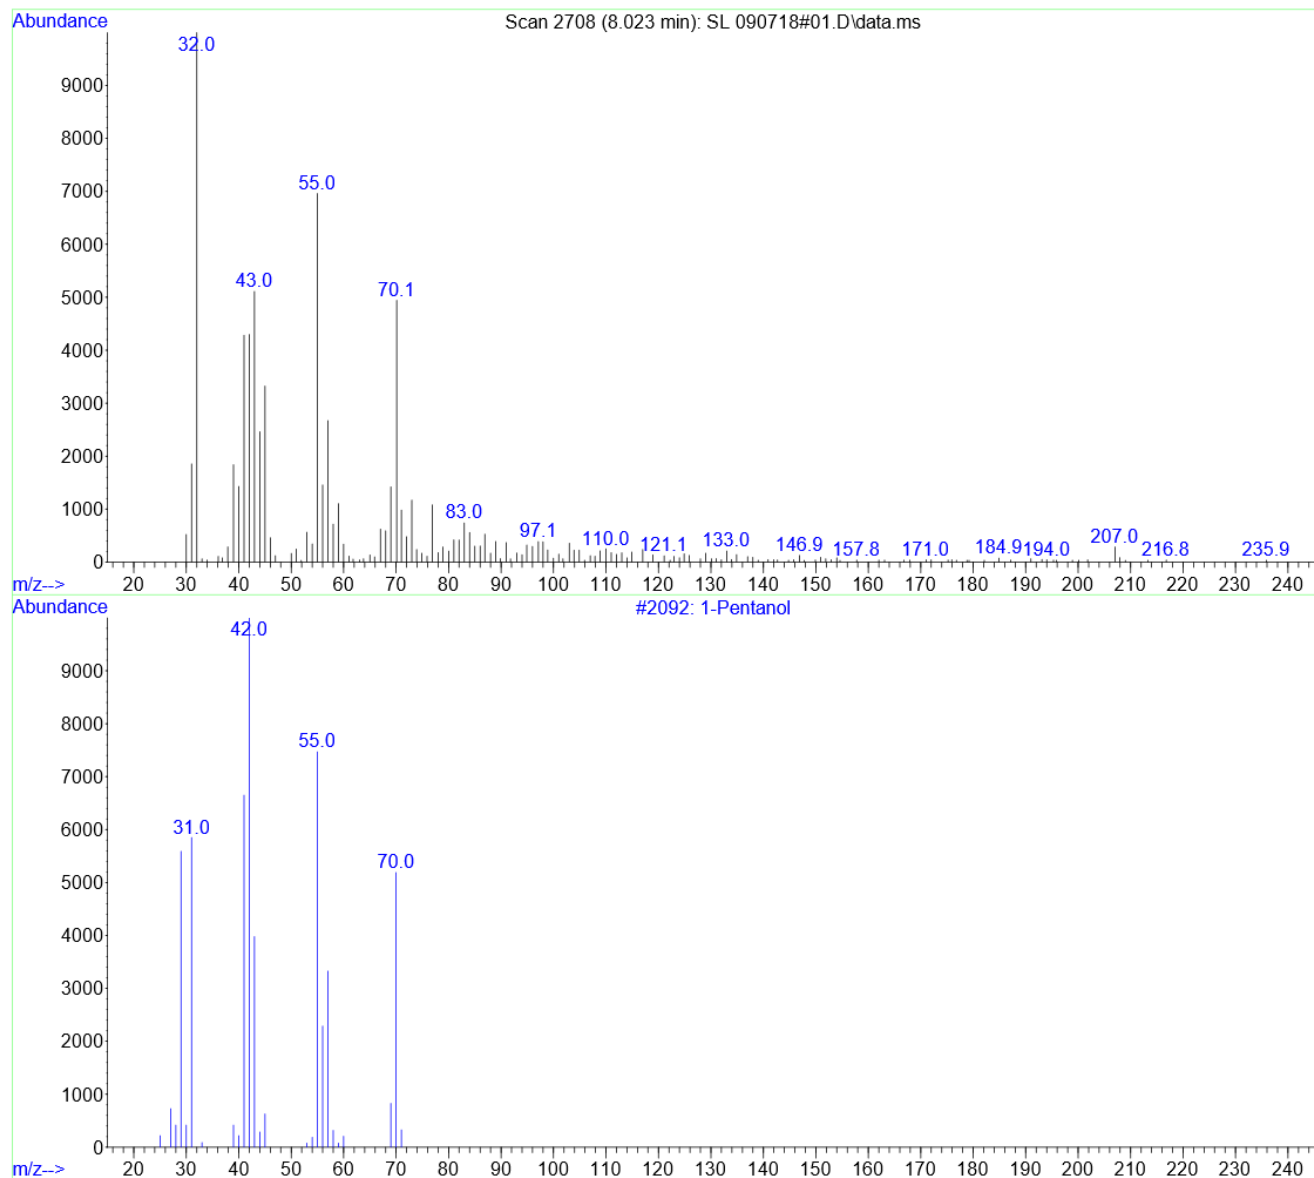

## 27. (E)-2-penten-1-ol

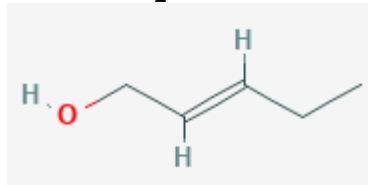

Library Searched : C:\Database\NIST11.L

Quality : 72

ID : 2-Penten-1-ol, (E)-

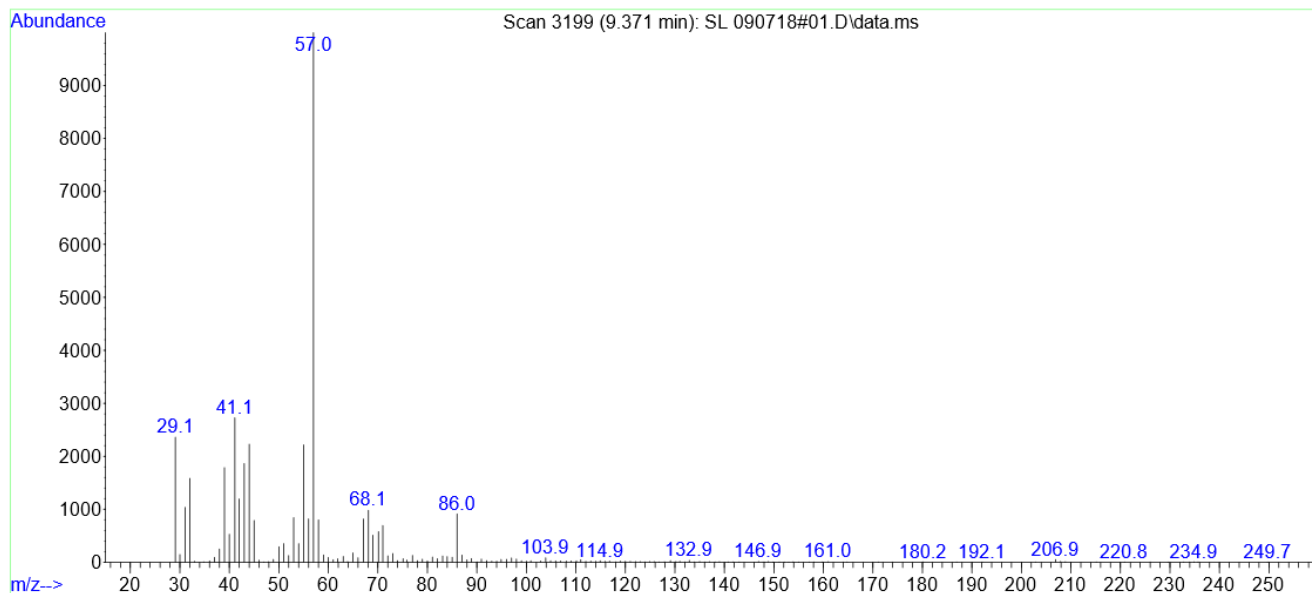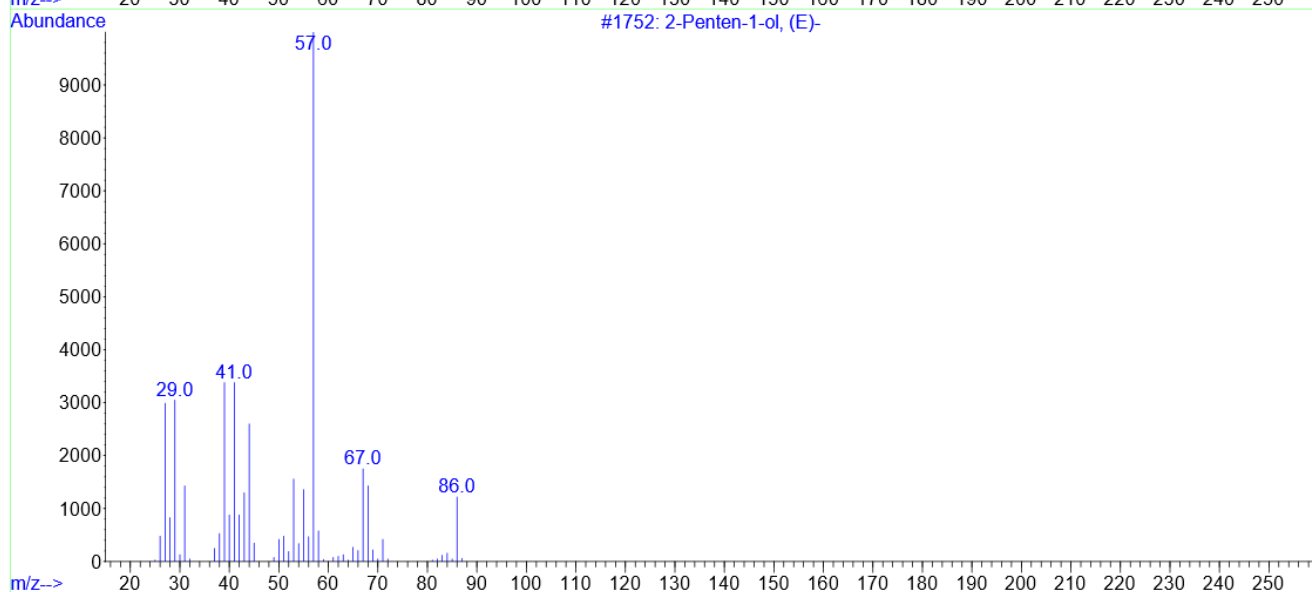

## 28. (Z)-2-penten-1-ol

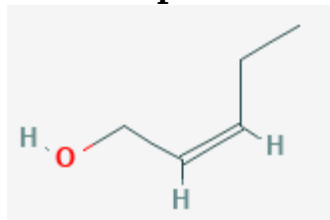

Library Searched : C:\Database\NIST11.L

Quality : 93

ID : 2-Penten-1-ol, (Z)-

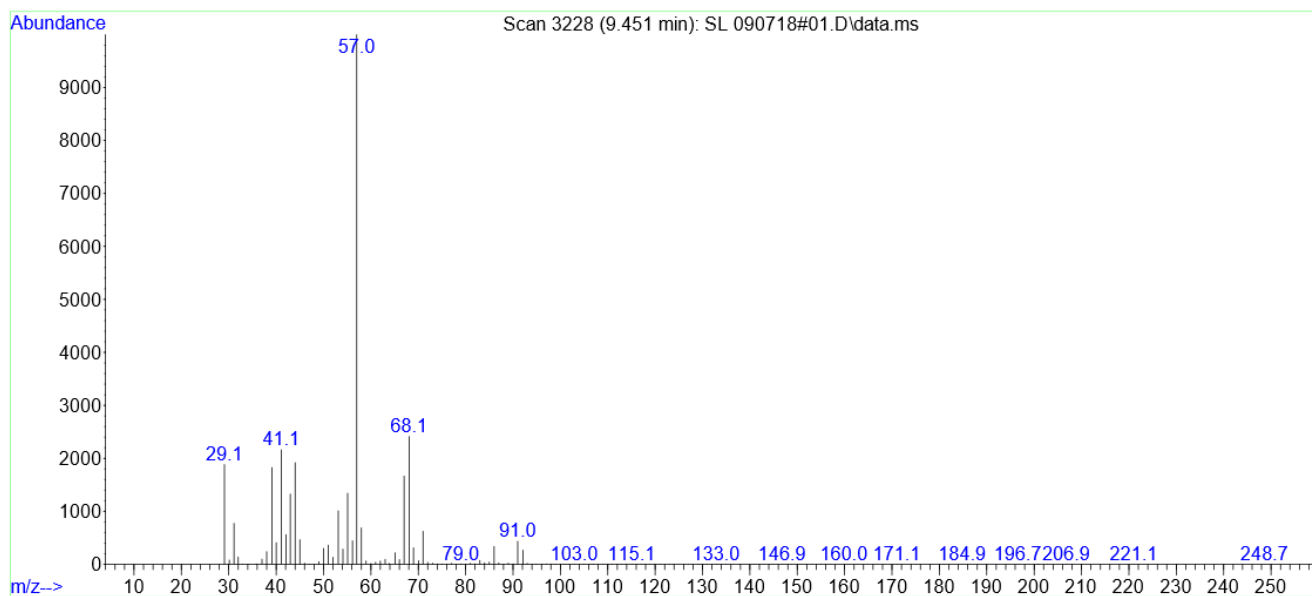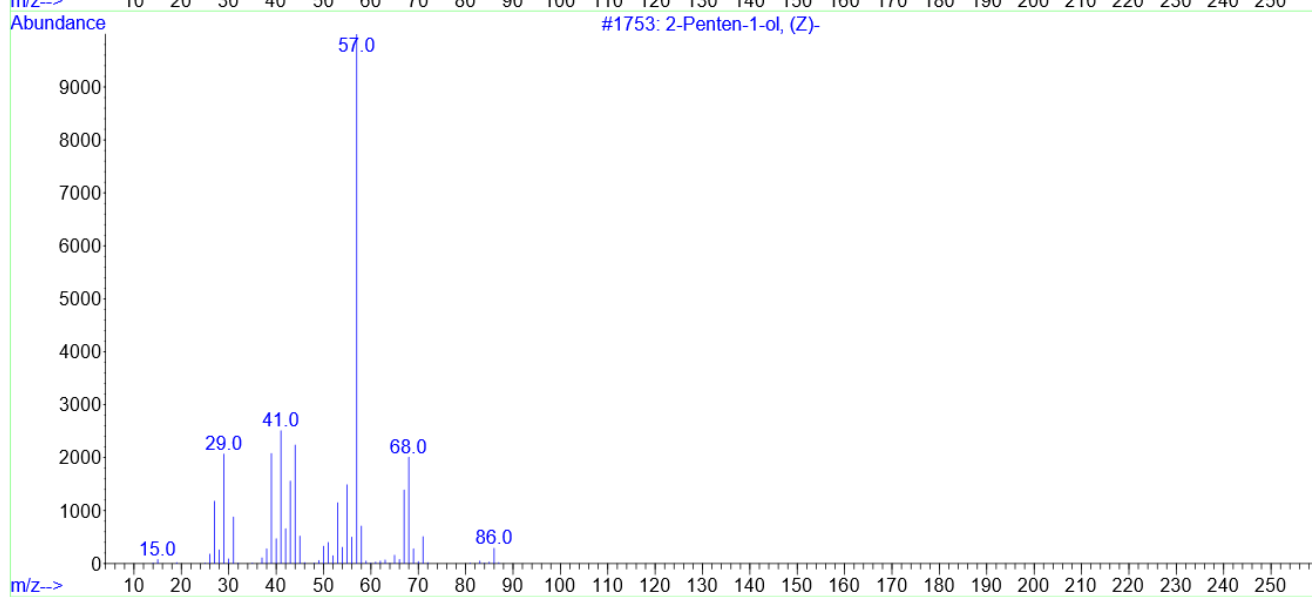

## 29. 1-propoxy-2-propanol

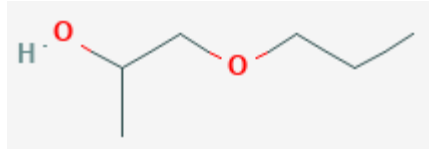

Library Searched : C:\Database\NIST11.L  
Quality : 87  
ID : 2-Propanol, 1-propoxy-

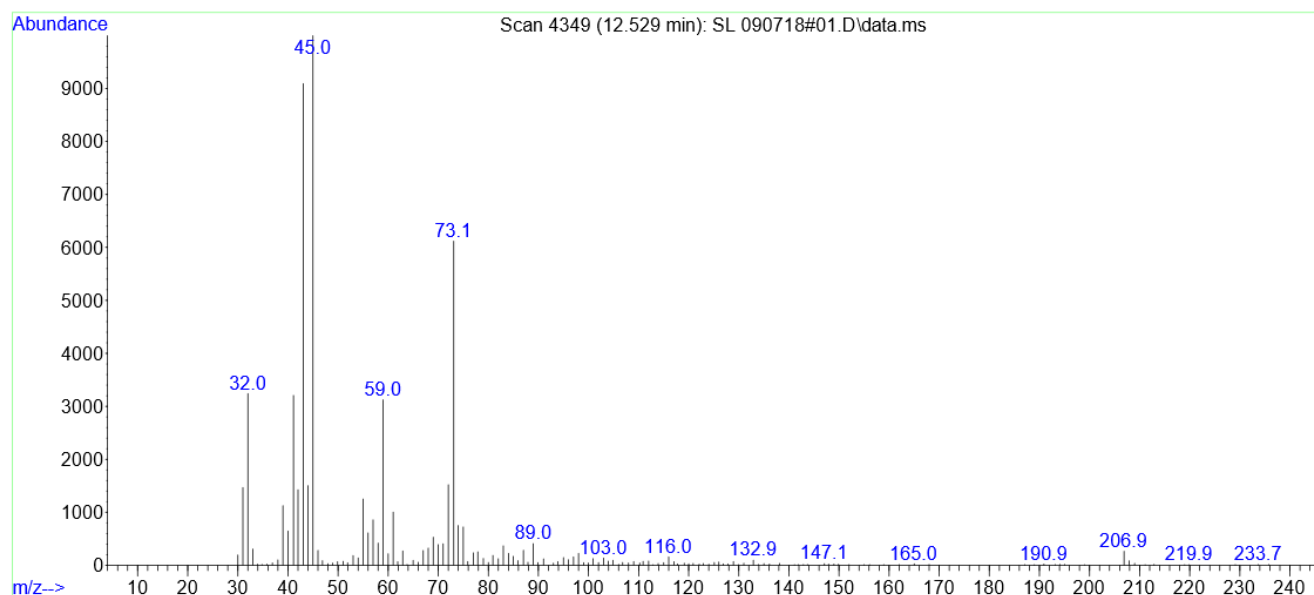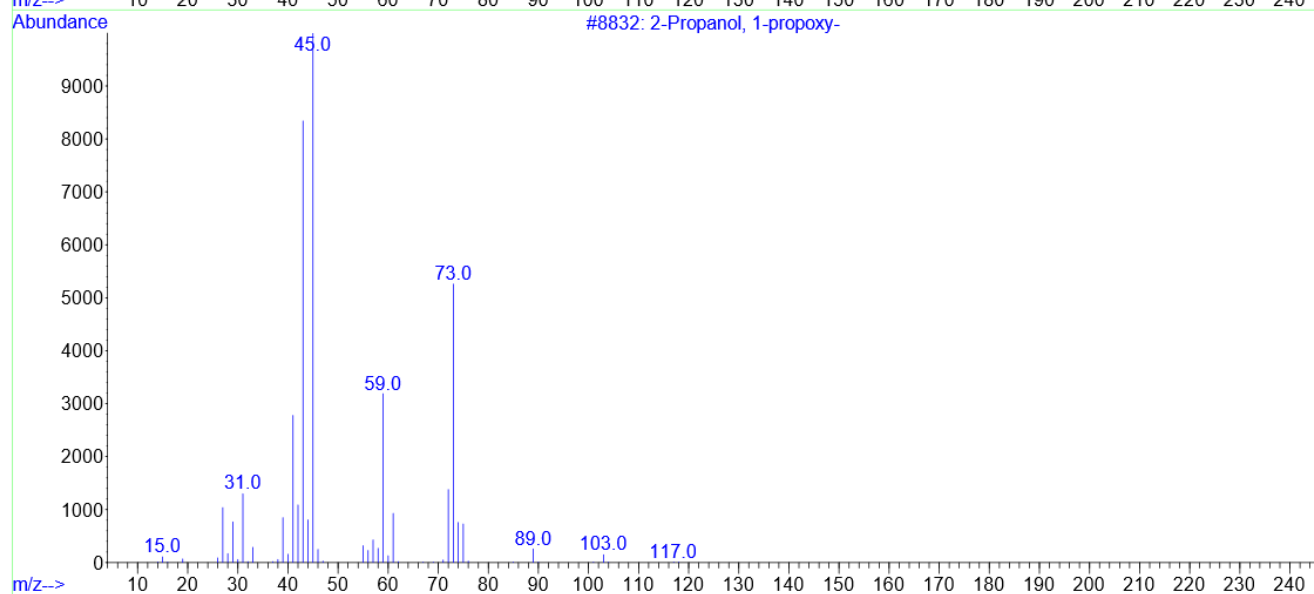

### 30. (E)-3-hexen-1-ol

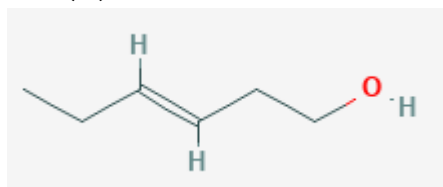

Library Searched : C:\Database\NIST11.L

Quality : 95

ID : 3-Hexen-1-ol, (E)-

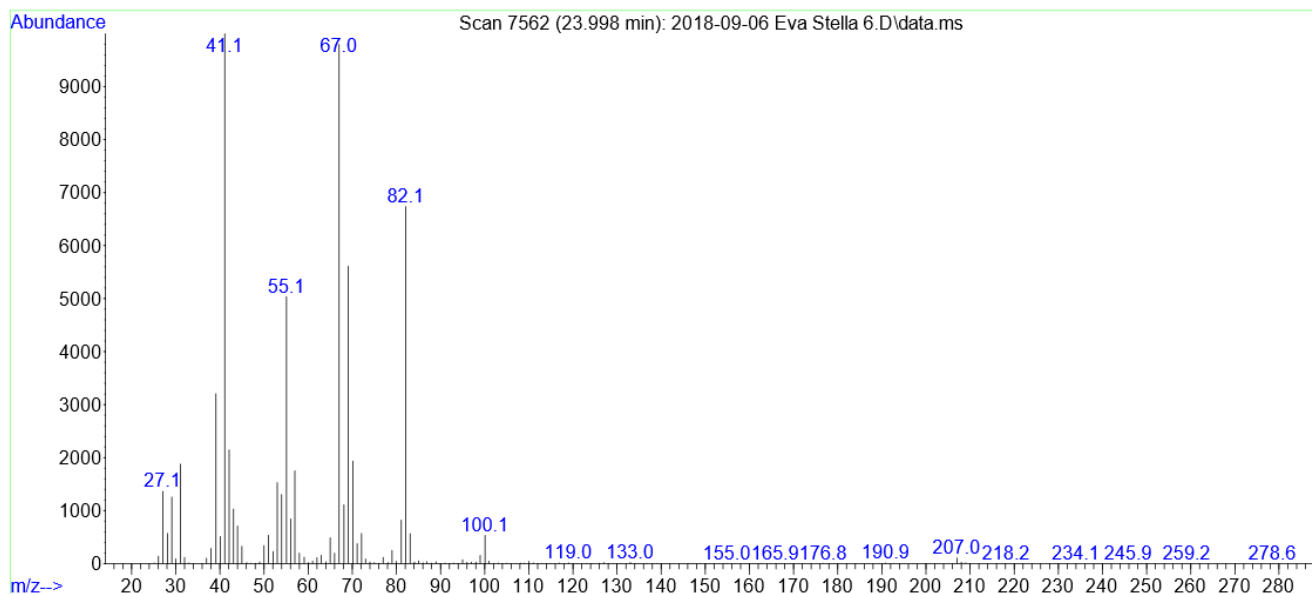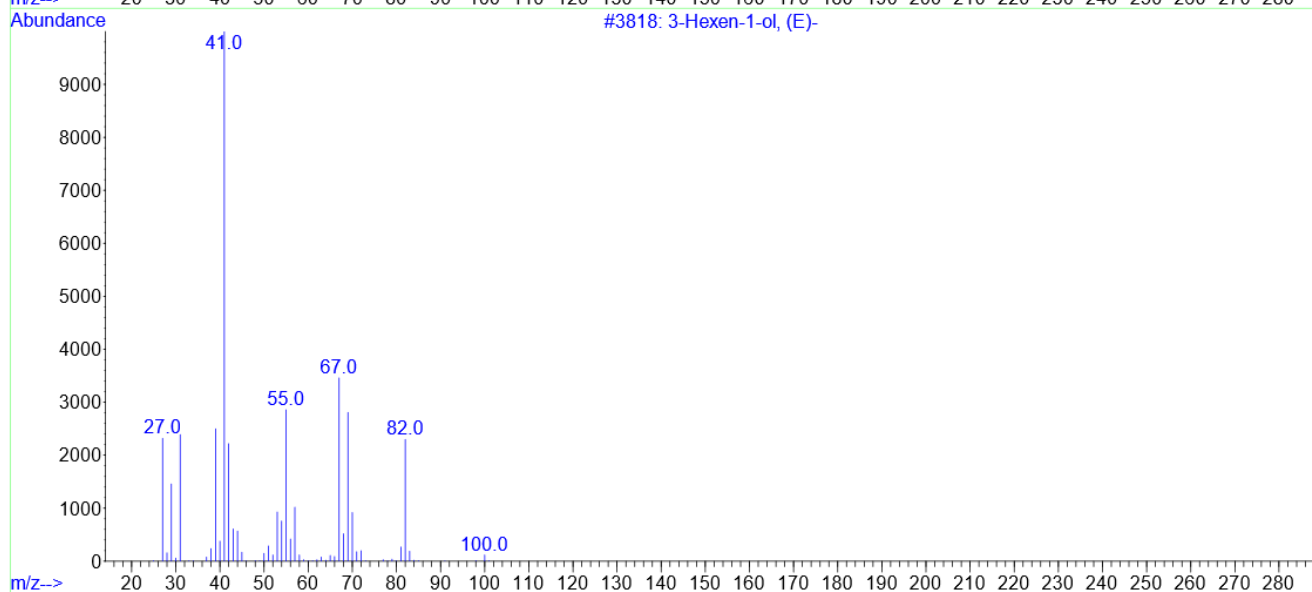



### 31. (Z)-3-hexen-1-ol

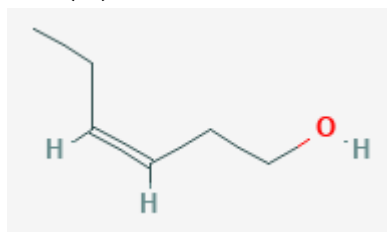

Library Searched : C:\Database\NIST11.L

Quality : 91

ID : 3-Hexen-1-ol, (Z)-

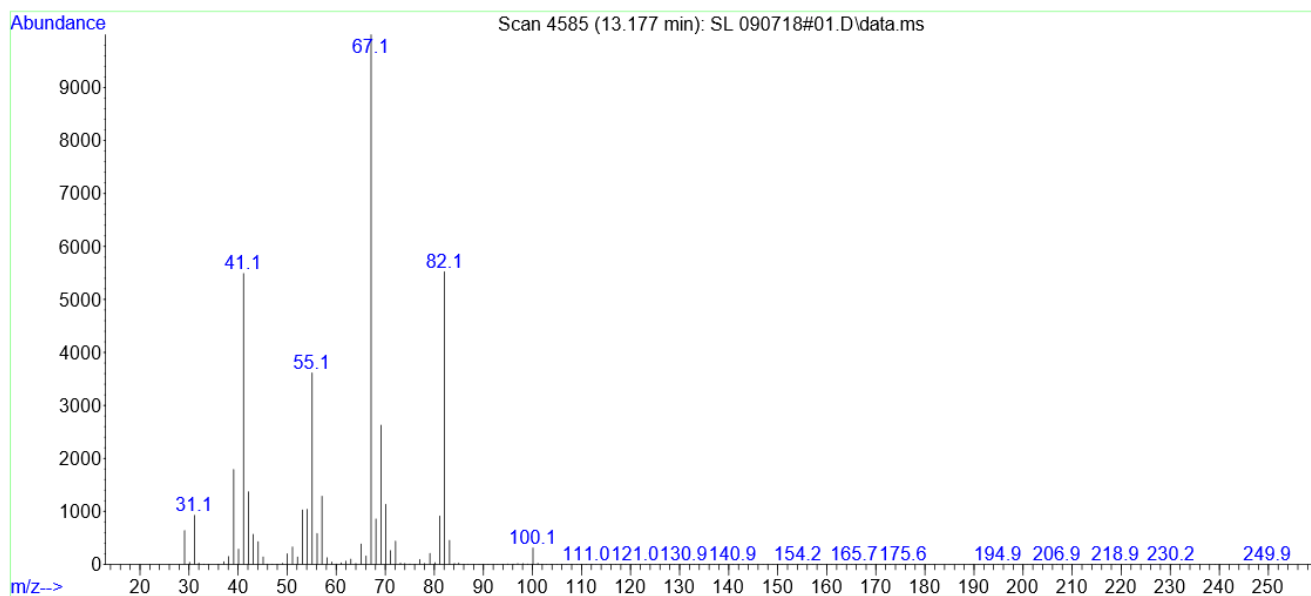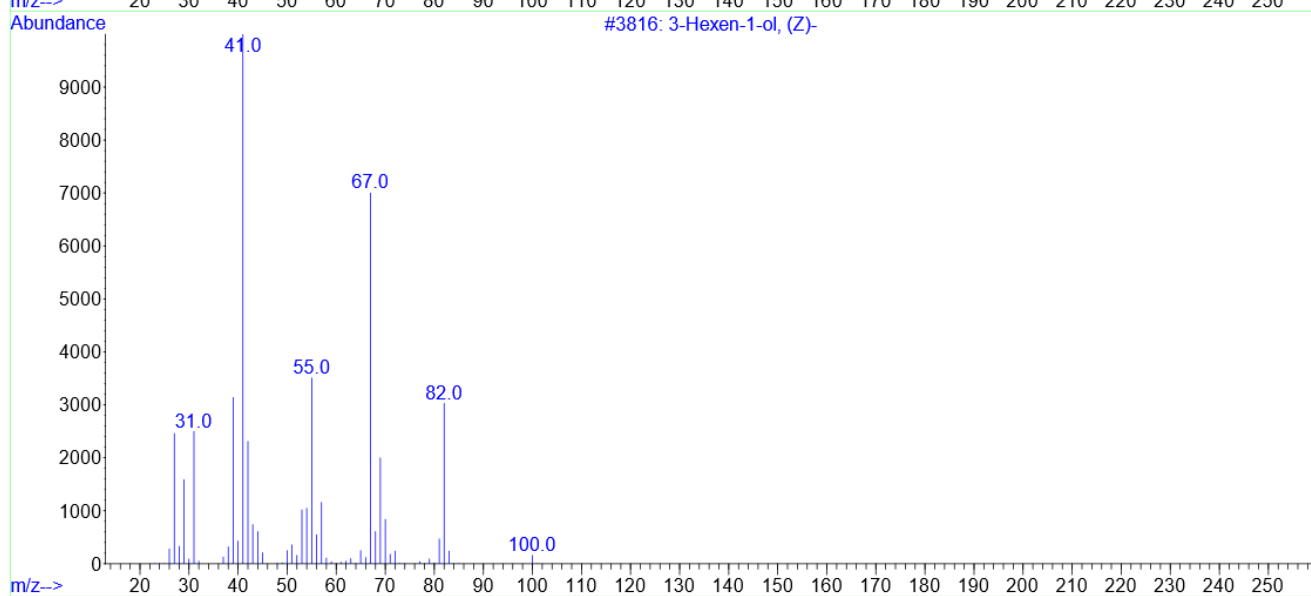

## 32. 2-hexen-1-ol

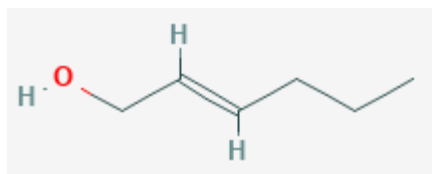

Library Searched : C:\Database\NIST11.L

Quality : 91

ID : 2-Hexen-1-ol, (E)-

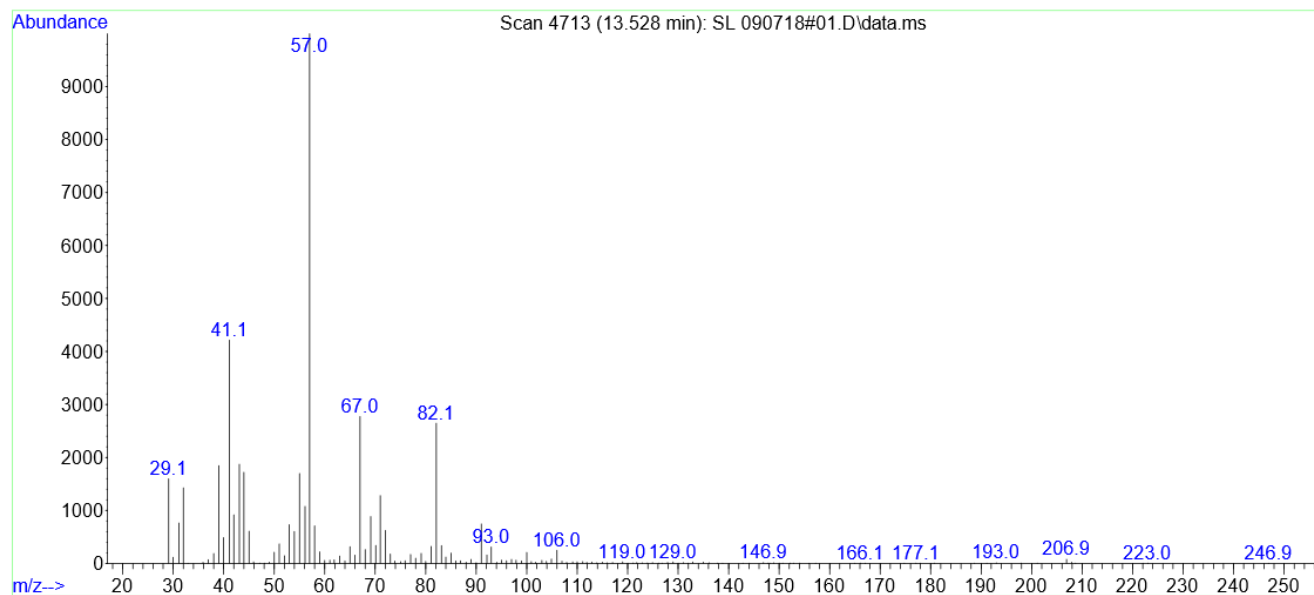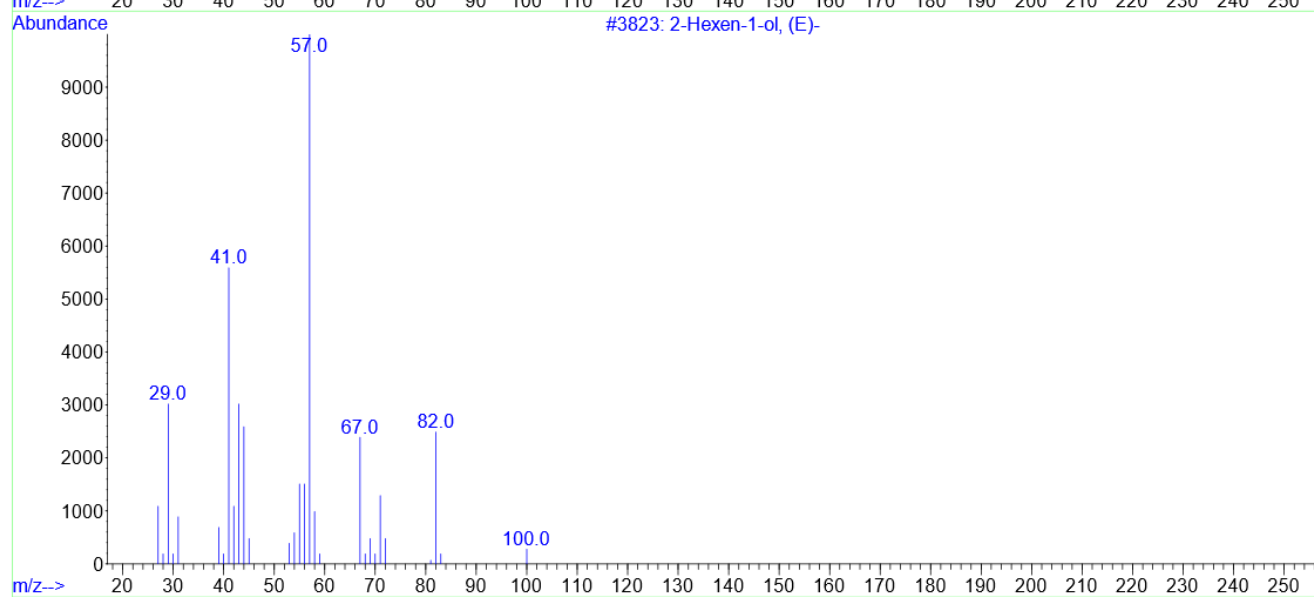

### 33. Hexan-1-ol

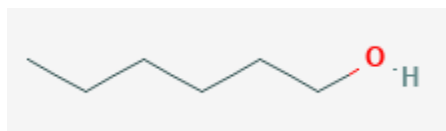

Library Searched : C:\Database\NIST11.L  
Quality : 90  
ID : 1-Hexanol

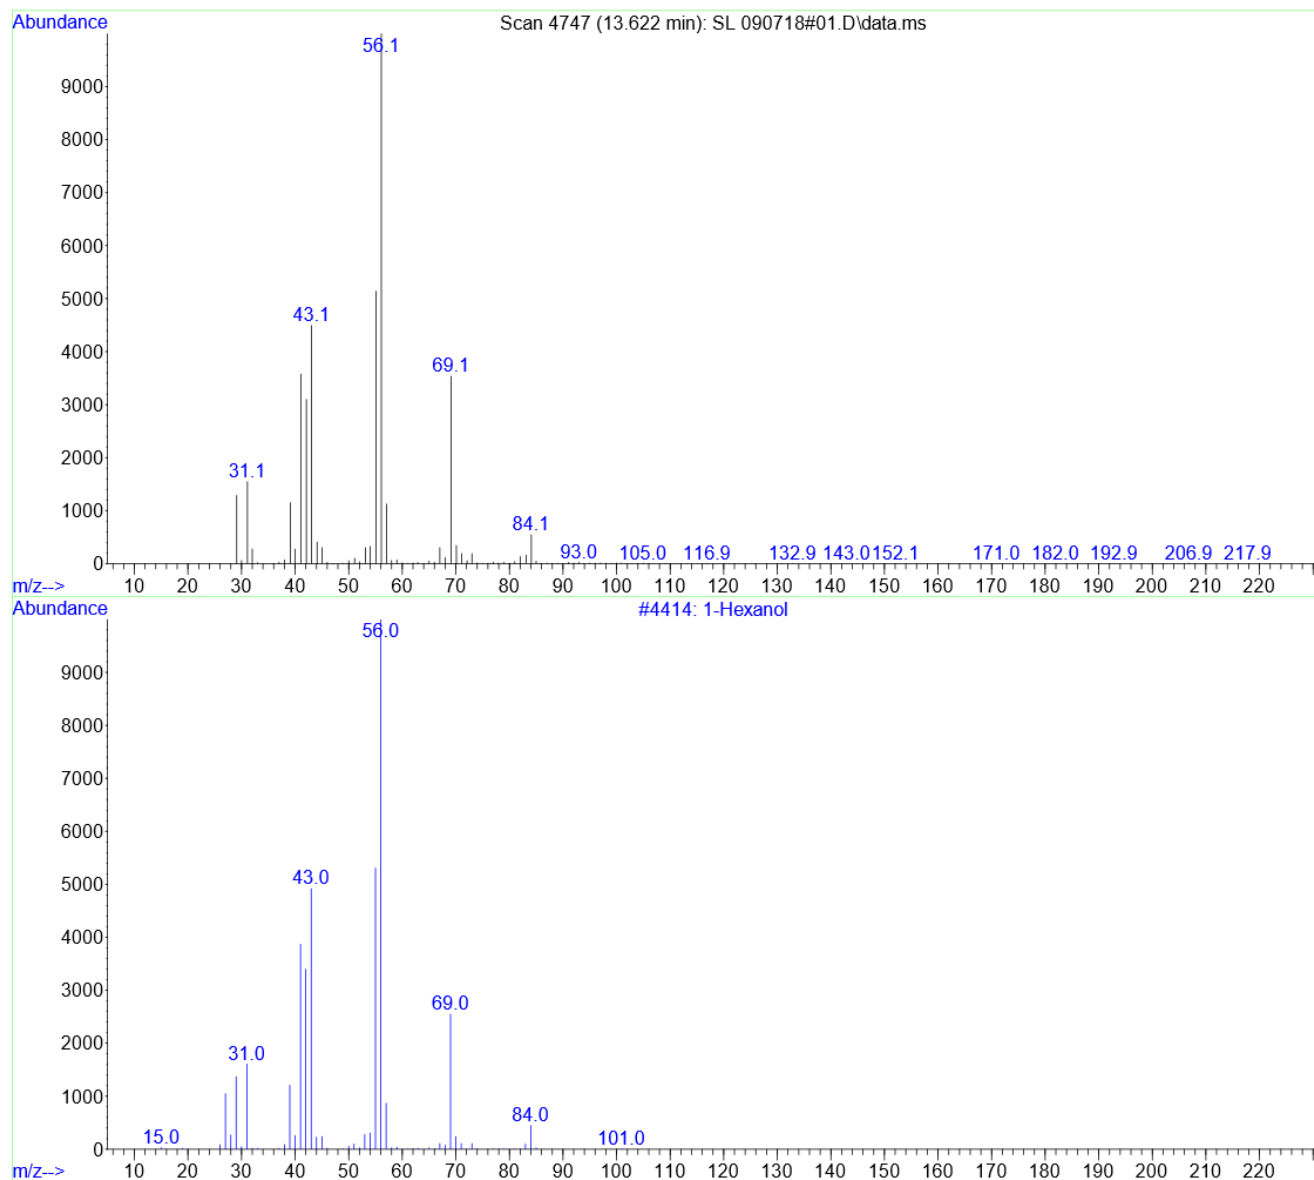

### 34. 1-octen-3-ol

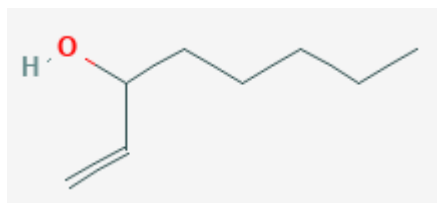

Library Searched : C:\Database\NIST11.L

Quality : 47

ID : 1-Octen-3-ol

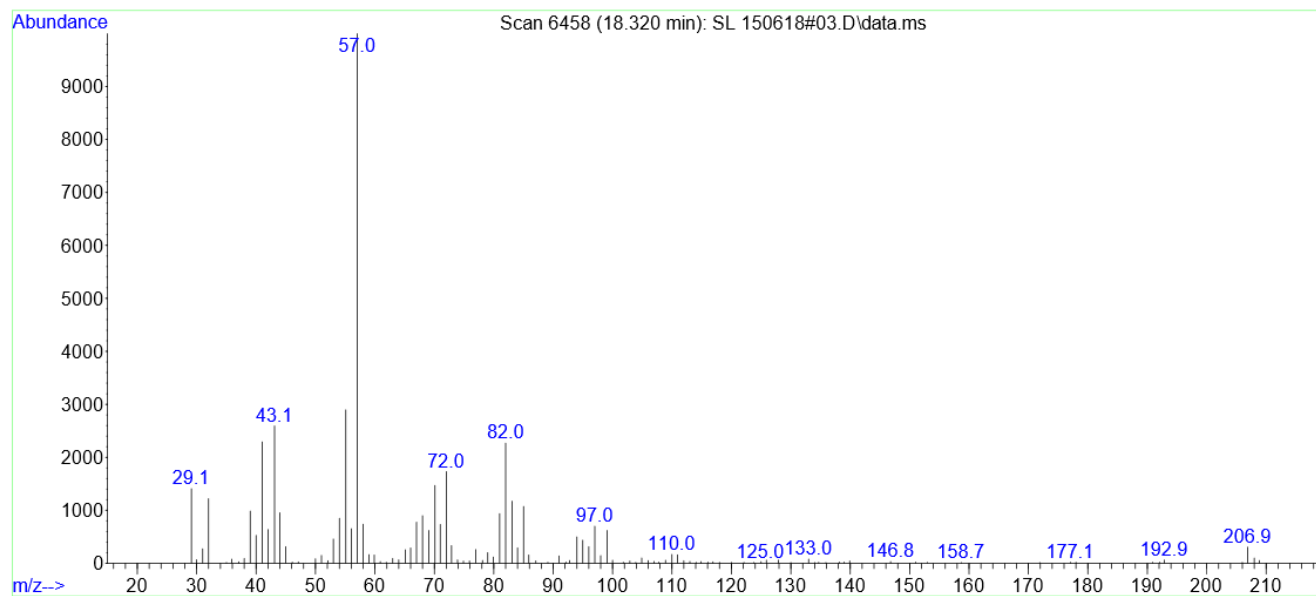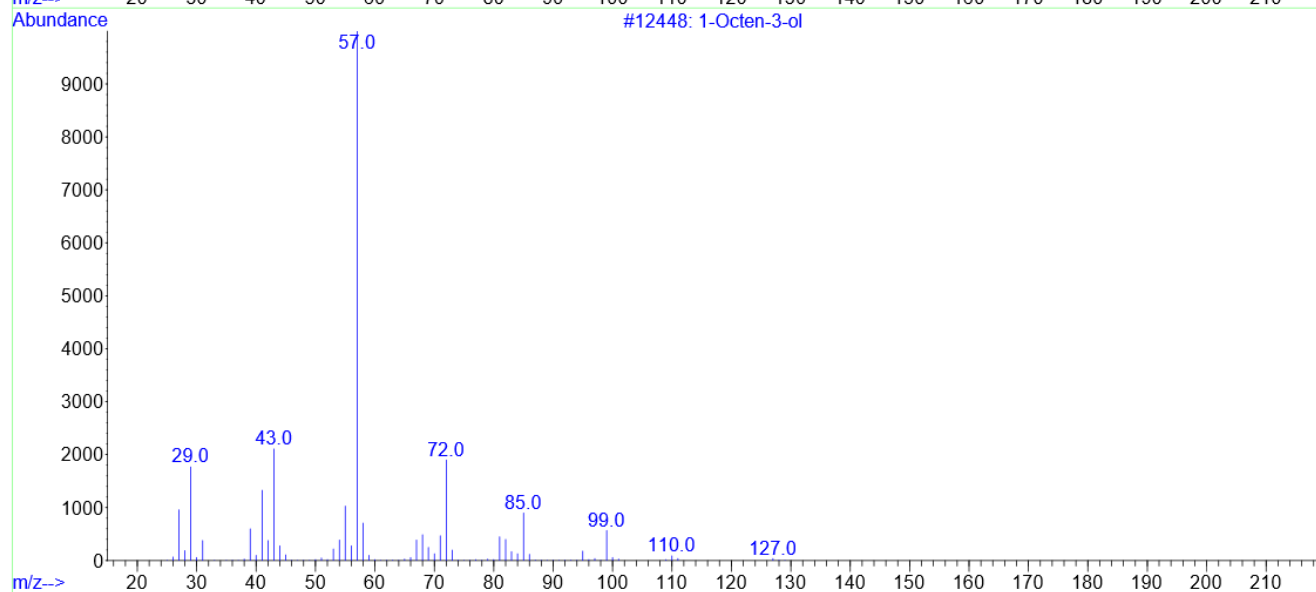

## 35. 2-ethylhexanol

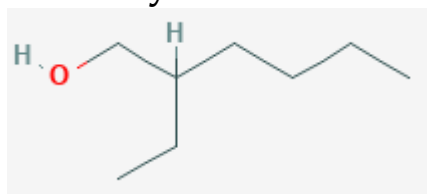

Library Searched : C:\Database\NIST11.L

Quality : 86

ID : 1-Hexanol, 2-ethyl-

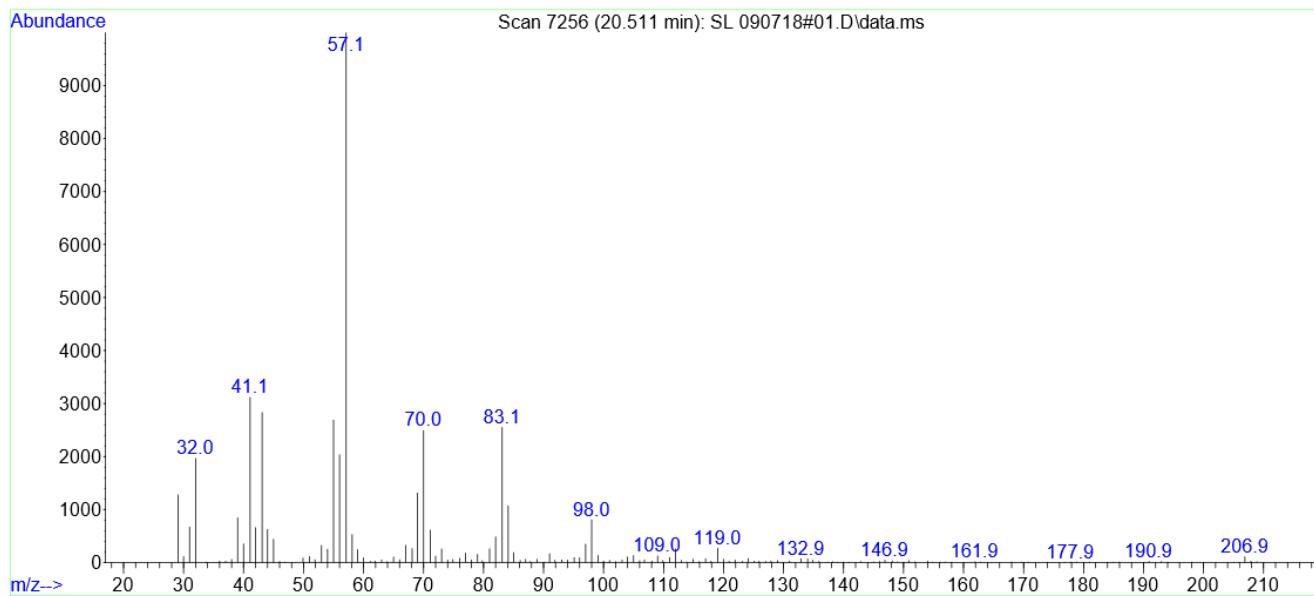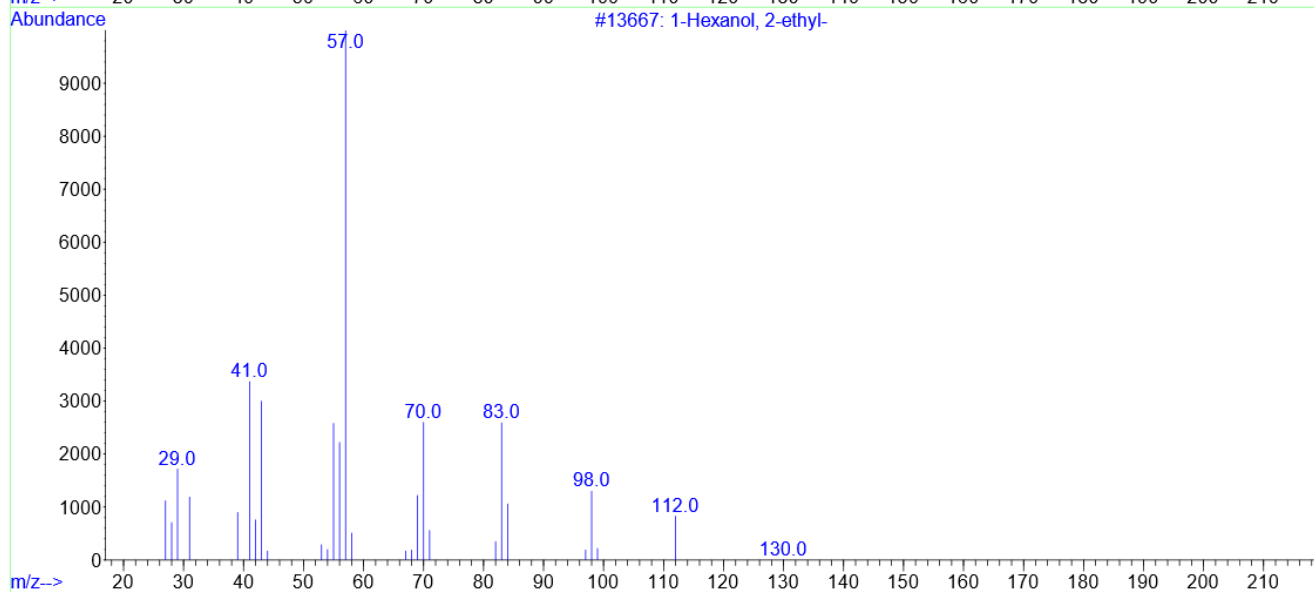

### 36. Benzyl alcohol

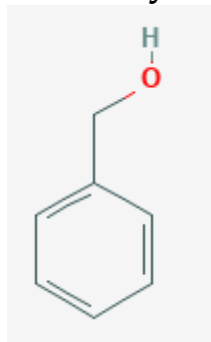

Library Searched : C:\Database\Adams.L  
Quality : 97  
ID : 8.77 Benzyl alcohol

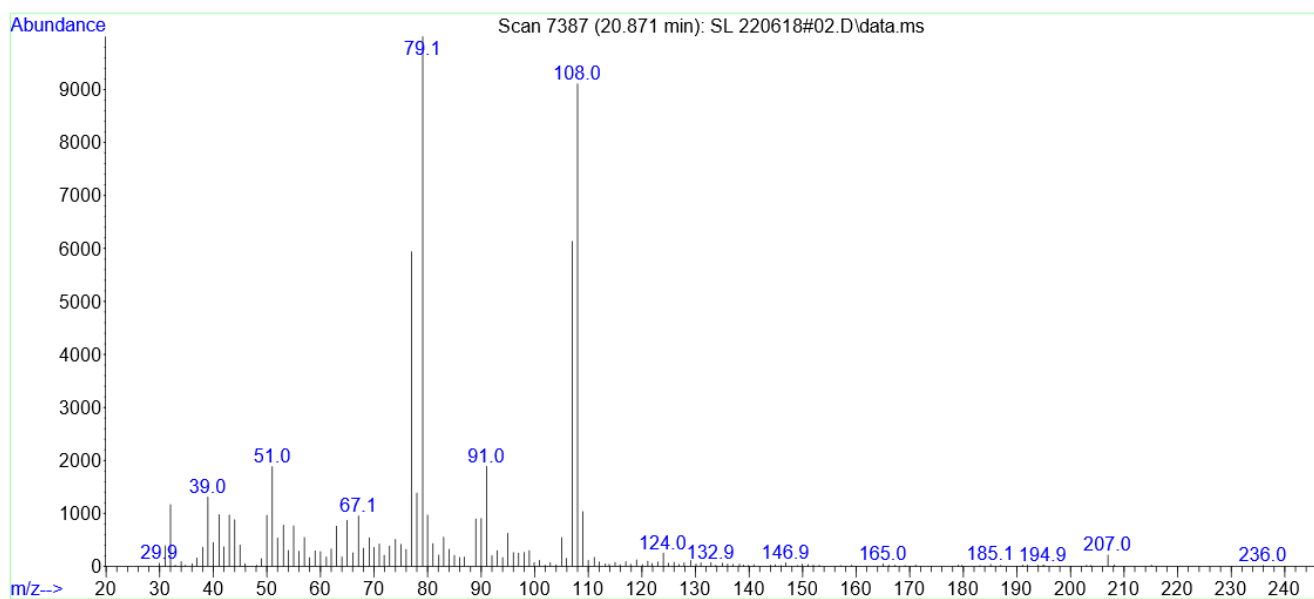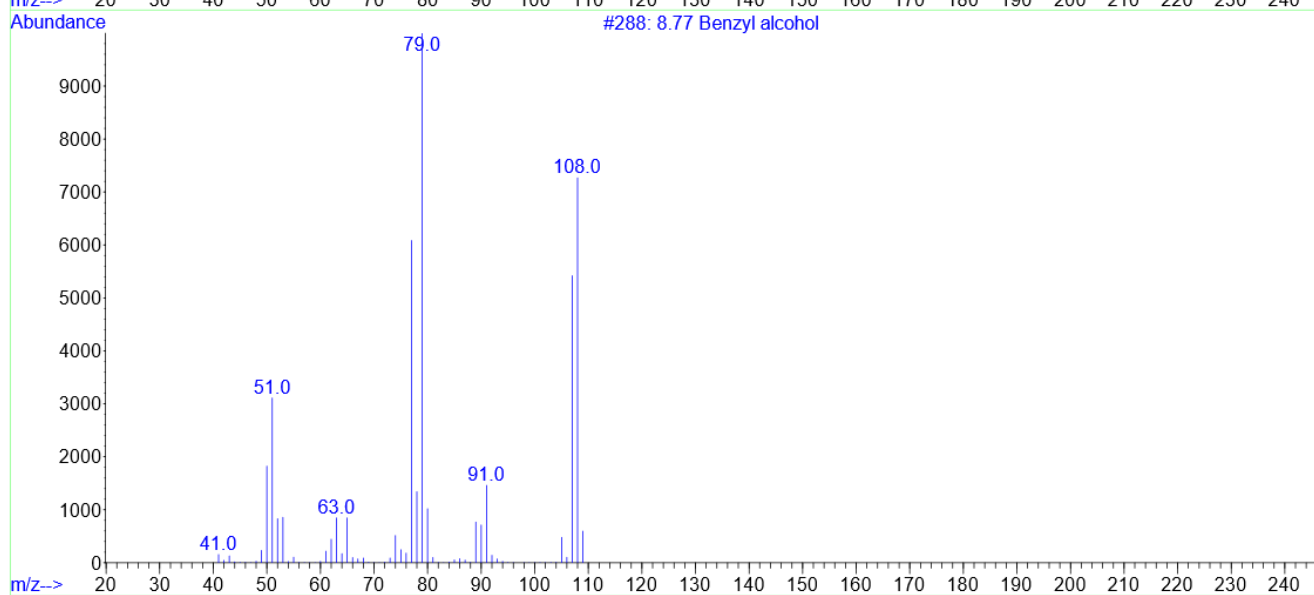

## 37. 2-phenylethanol

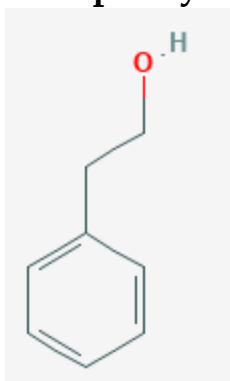

Library Searched : C:\Database\NIST11.L  
Quality : 94  
ID : Phenylethyl Alcohol

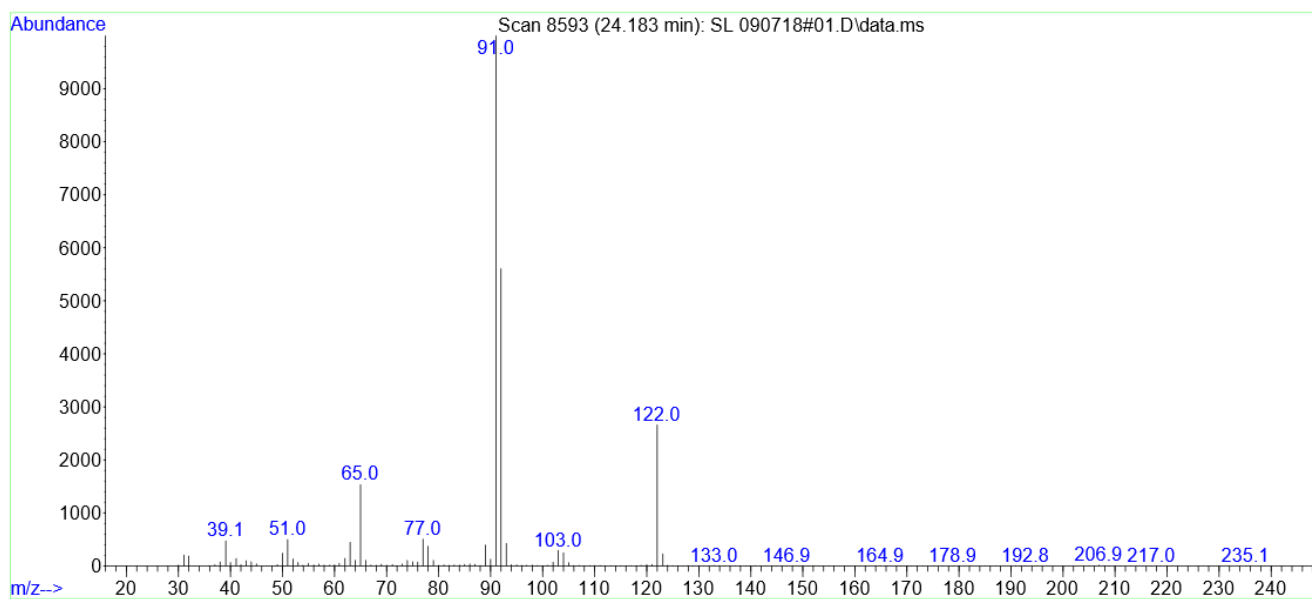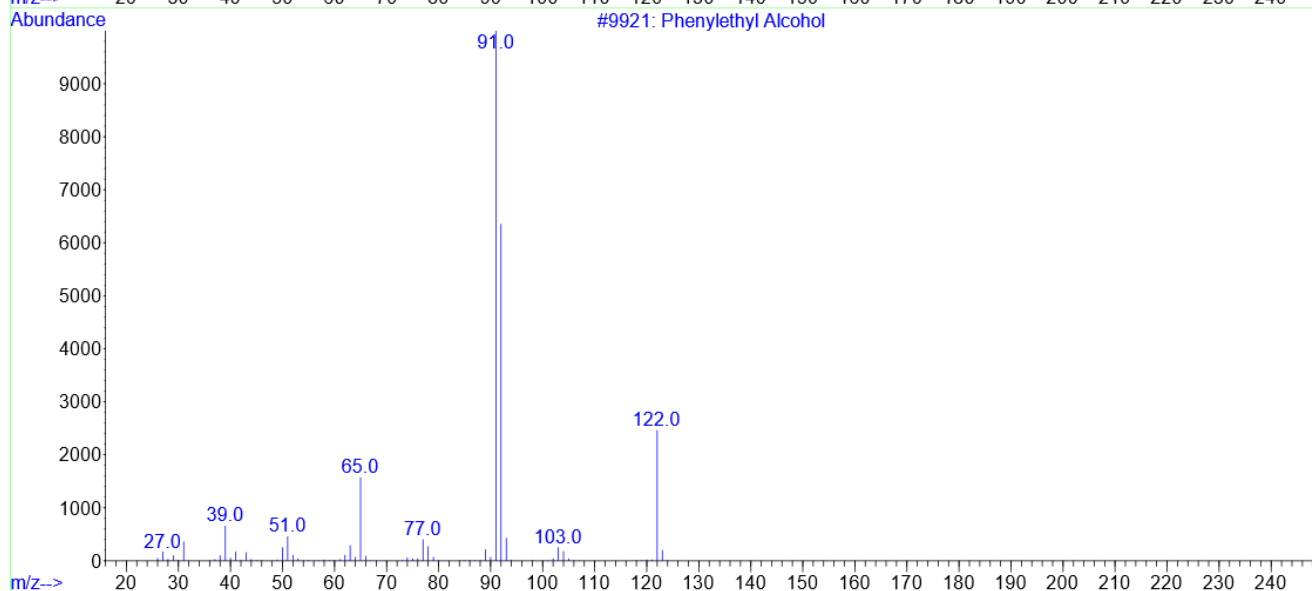

### 38. 1-nonanol

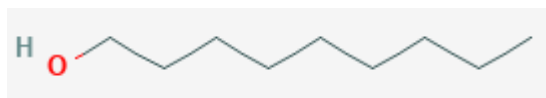

Library Searched : C:\Database\Adams.L

Quality : 78

ID : 14.29 Nonanol<n->

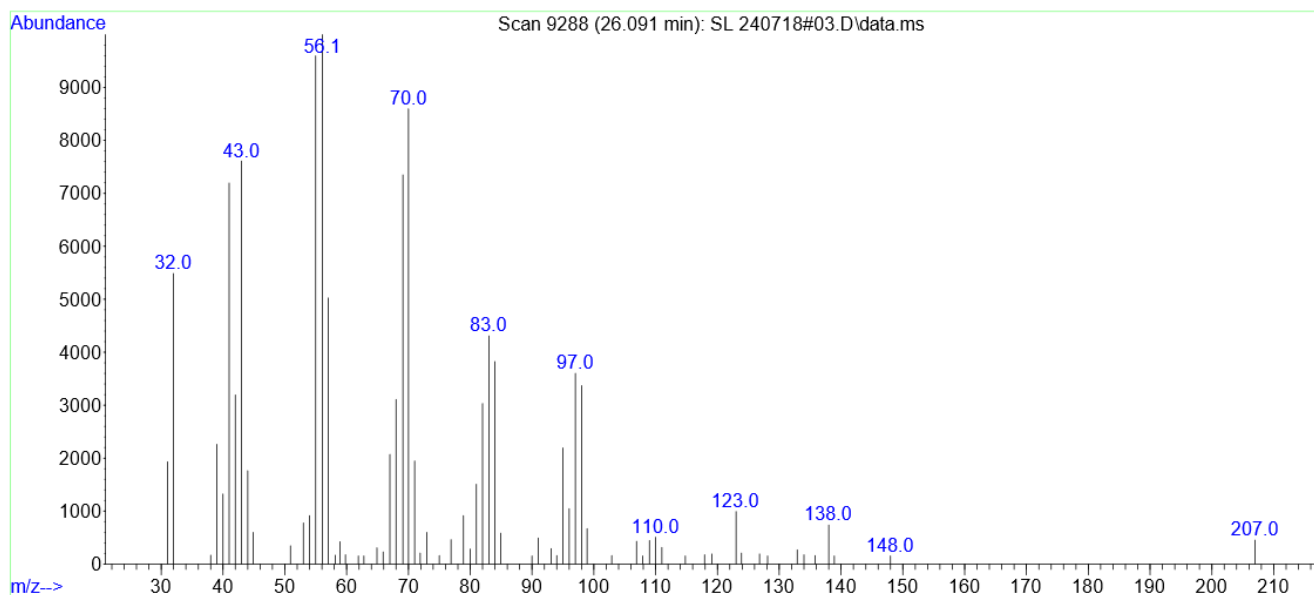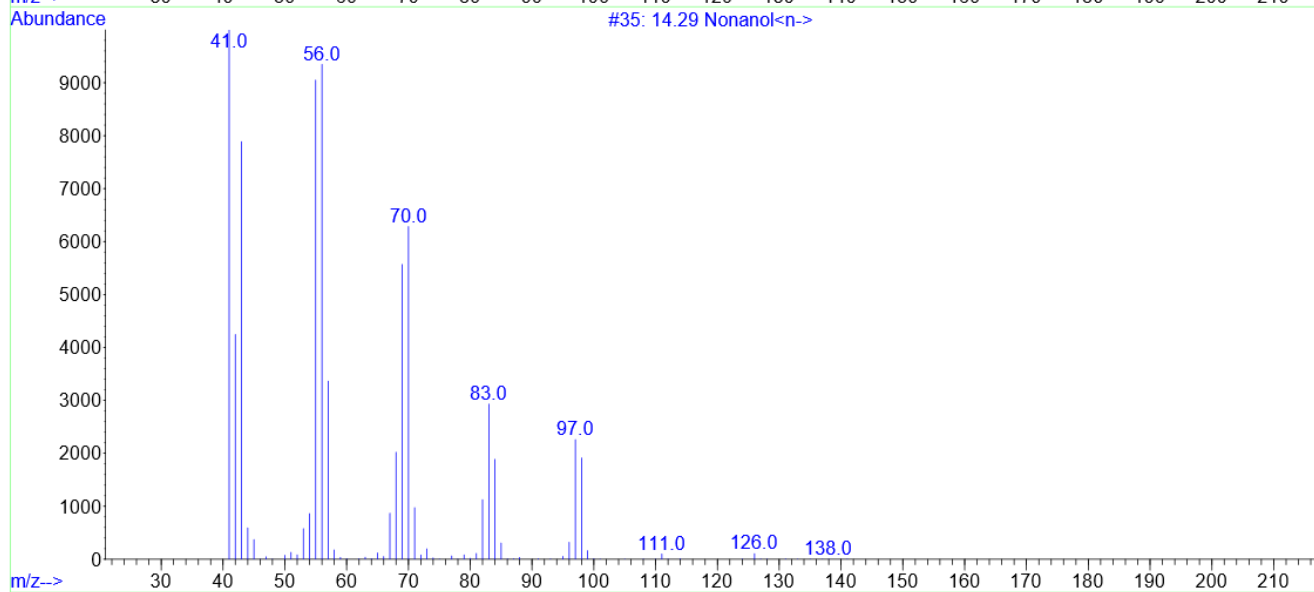



### 39. Terpinen-4-ol

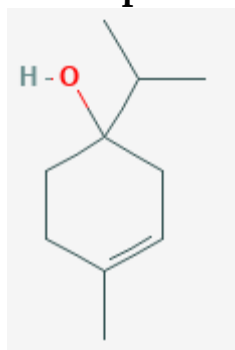

Library Searched : C:\Database\Adams.L

Quality : 93

ID : 14.66 Terpinen-4-ol

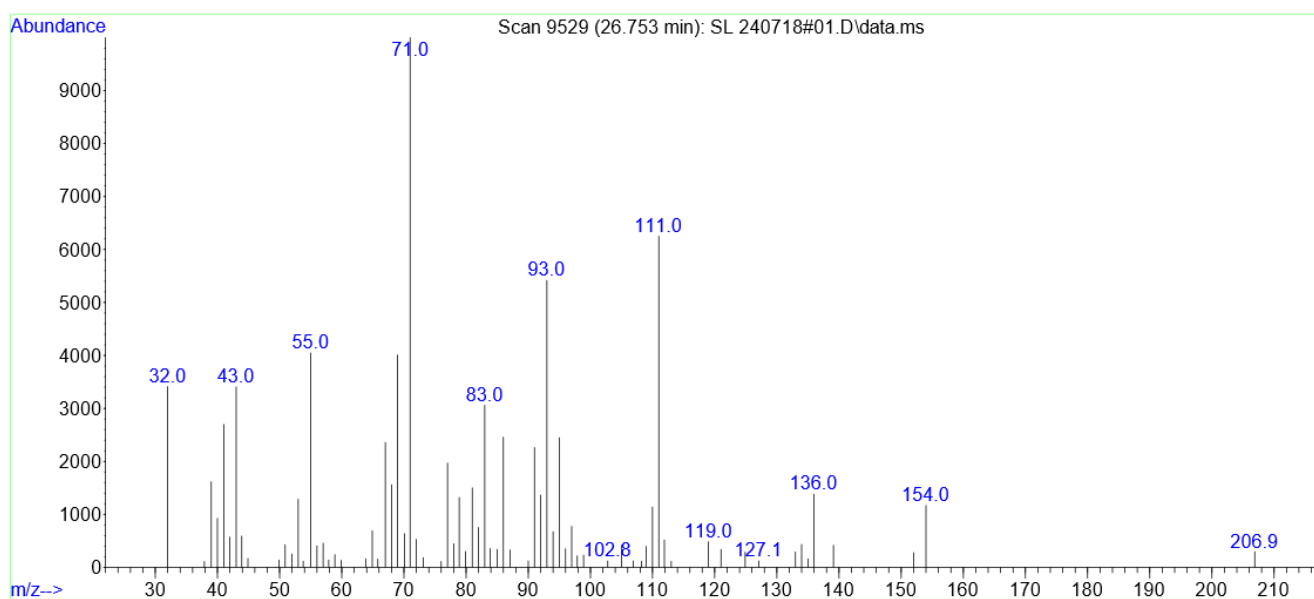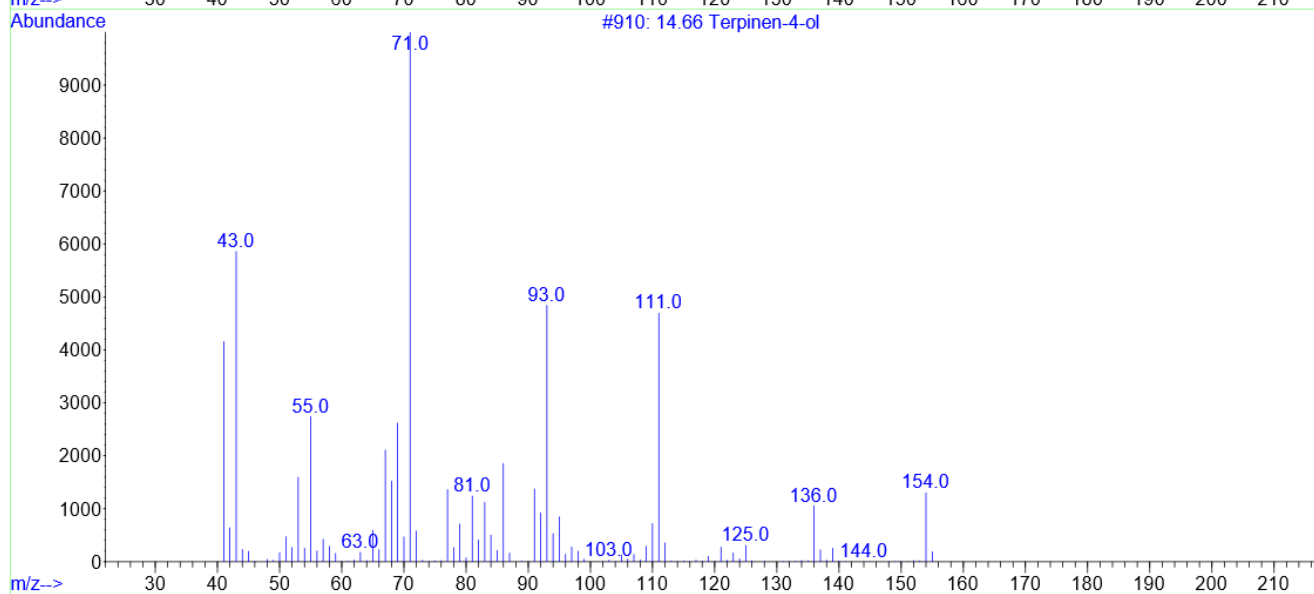

## 40. 2-pentanal

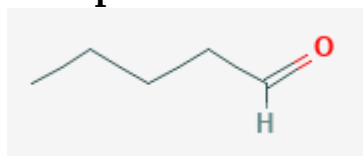

Library Searched : C:\Database\Adams.L  
Quality : 87  
ID : 2.27 Pentanal

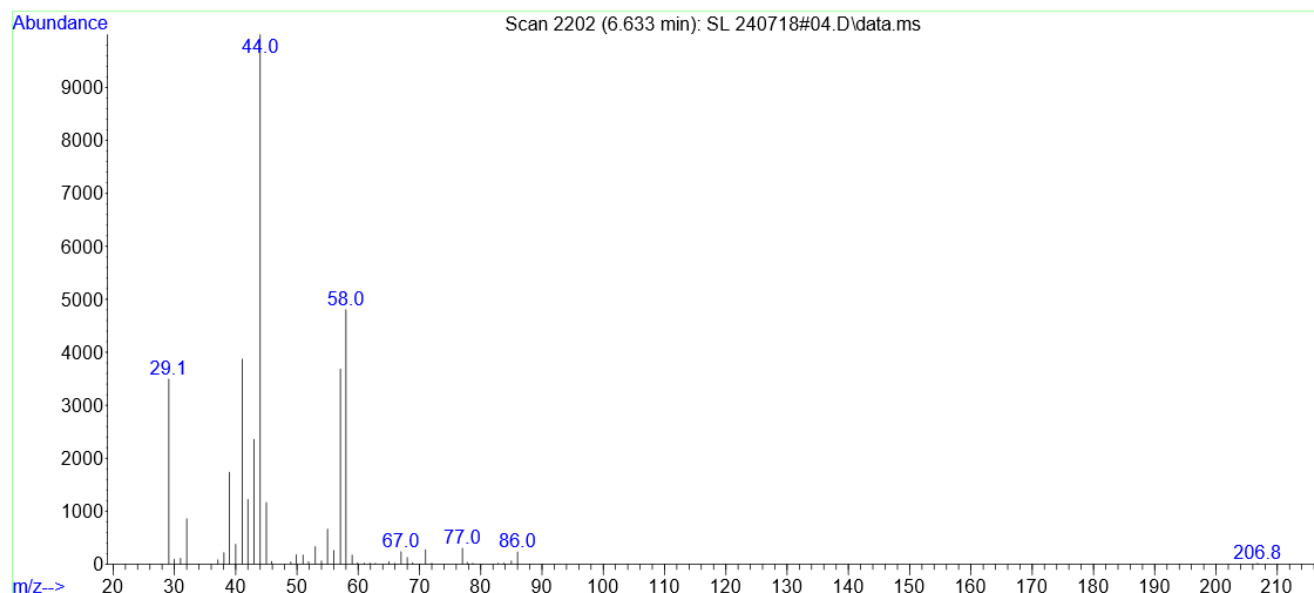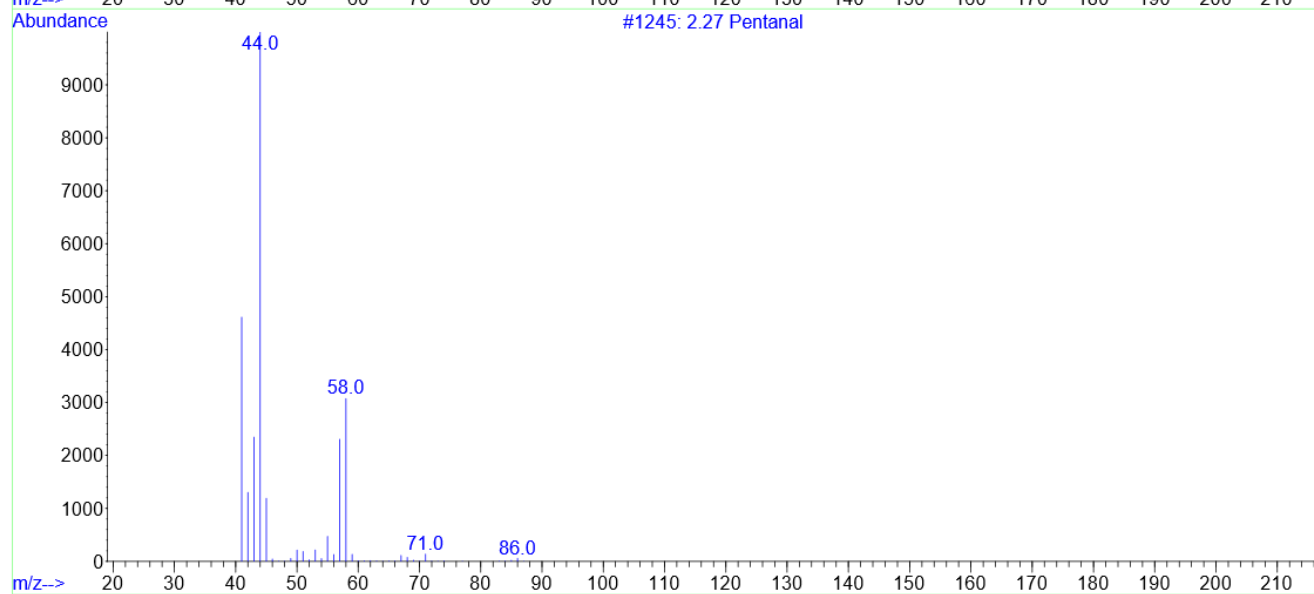

## 41. 2-pentenal

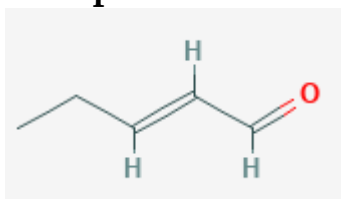

Library Searched : C:\Database\NIST11.L

Quality : 81

ID : 2-Pentenal, (E)-

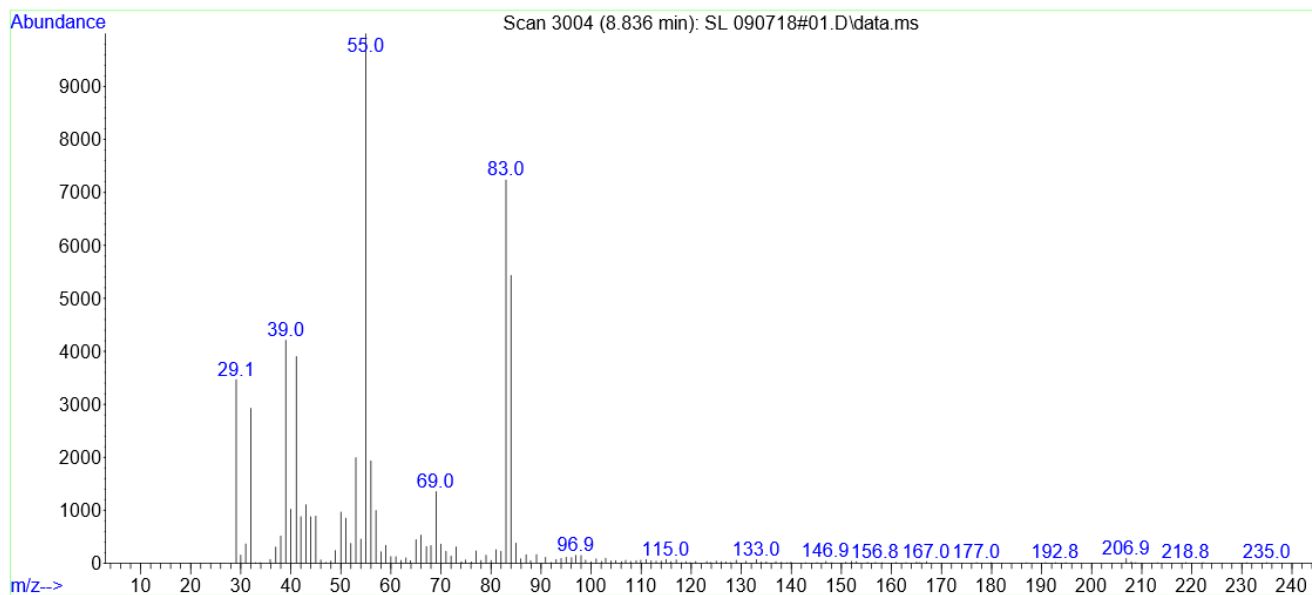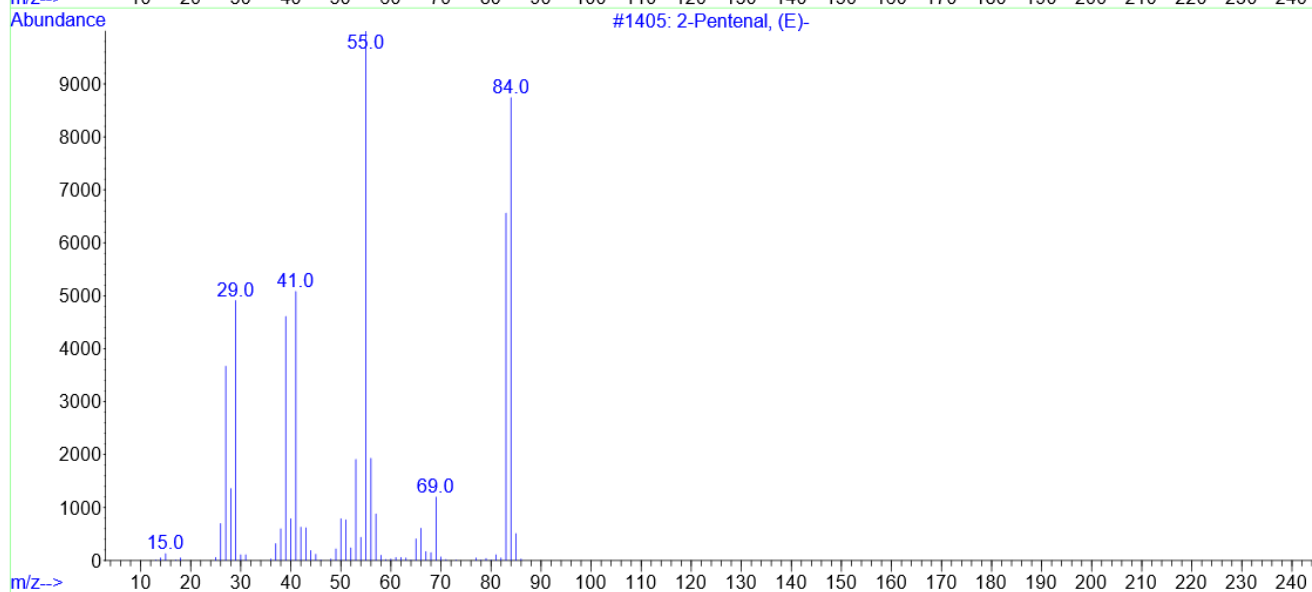

## 42. 3-hexenal

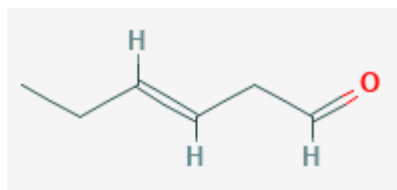

Library Searched : C:\Database\NIST11.L

Quality : 90

ID : 3-Hexenal

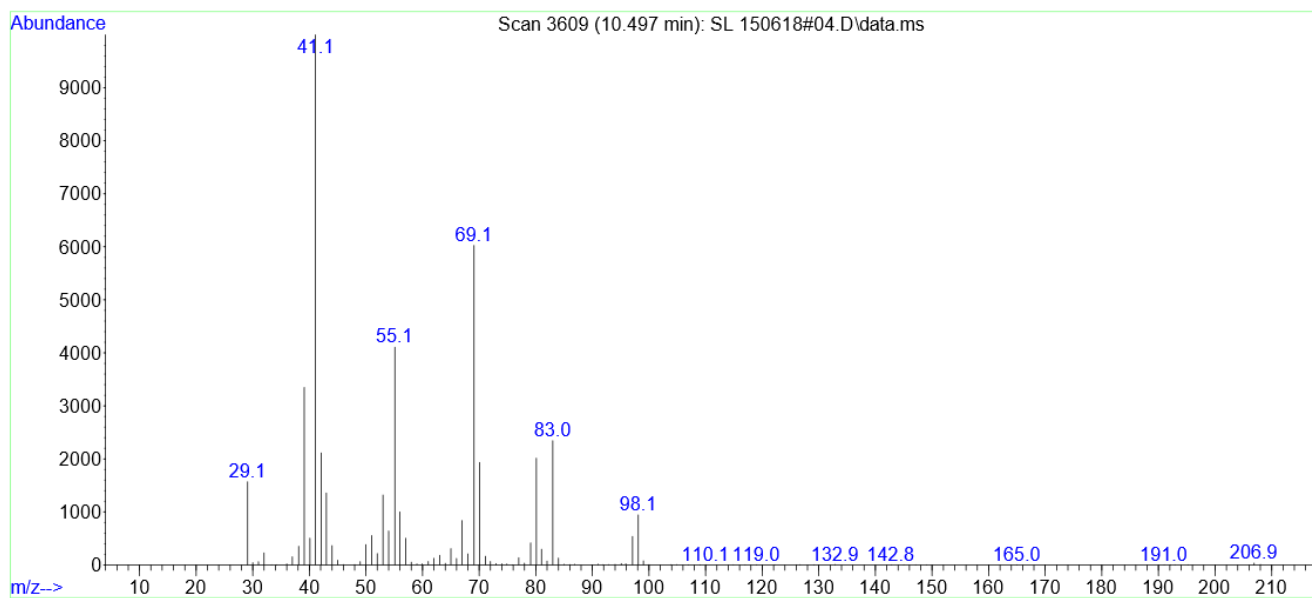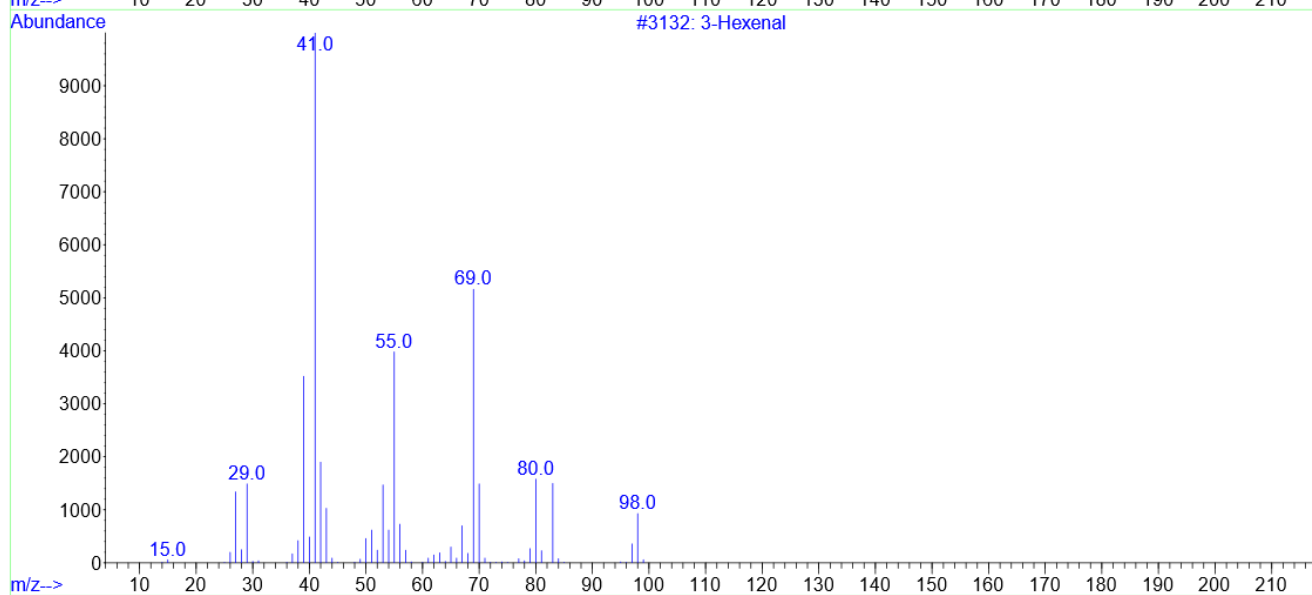

## 43. Hexanal

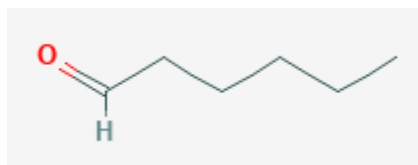

Library Searched : C:\Database\NIST11.L

Quality : 90

ID : Hexanal

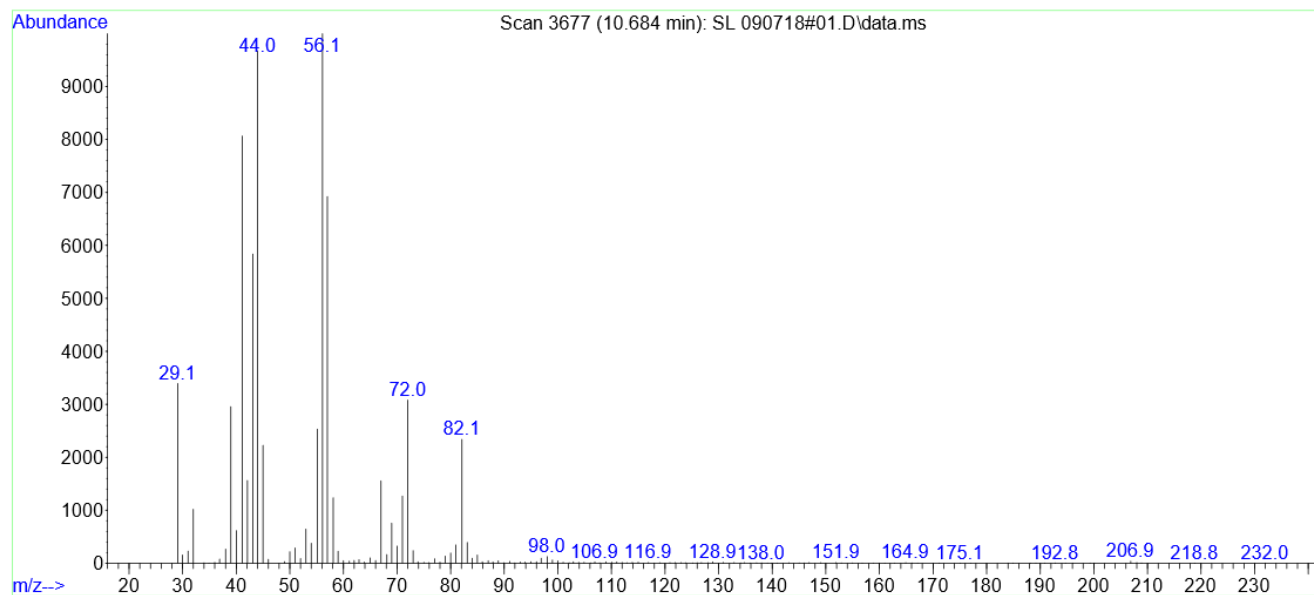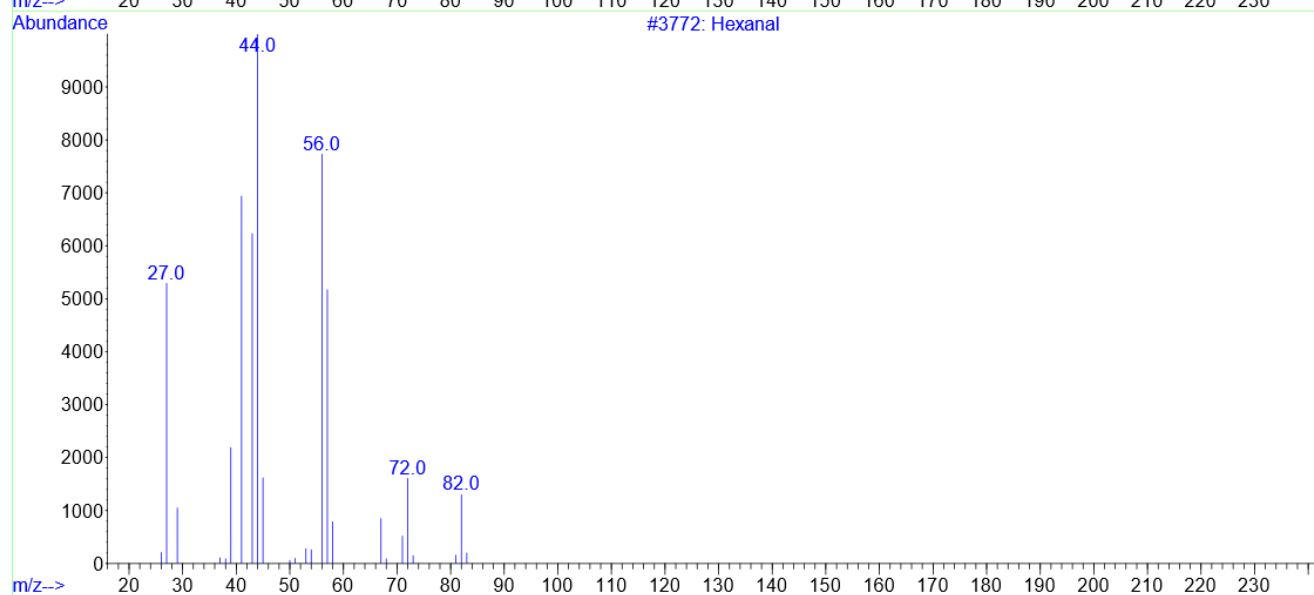

## 44. (E)-2-hexenal

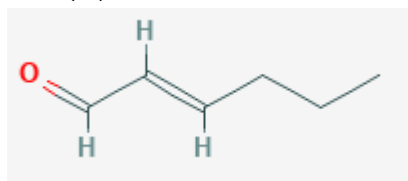

Library Searched : C:\Database\NIST11.L  
Quality : 98  
ID : 2-Hexenal, (E)-

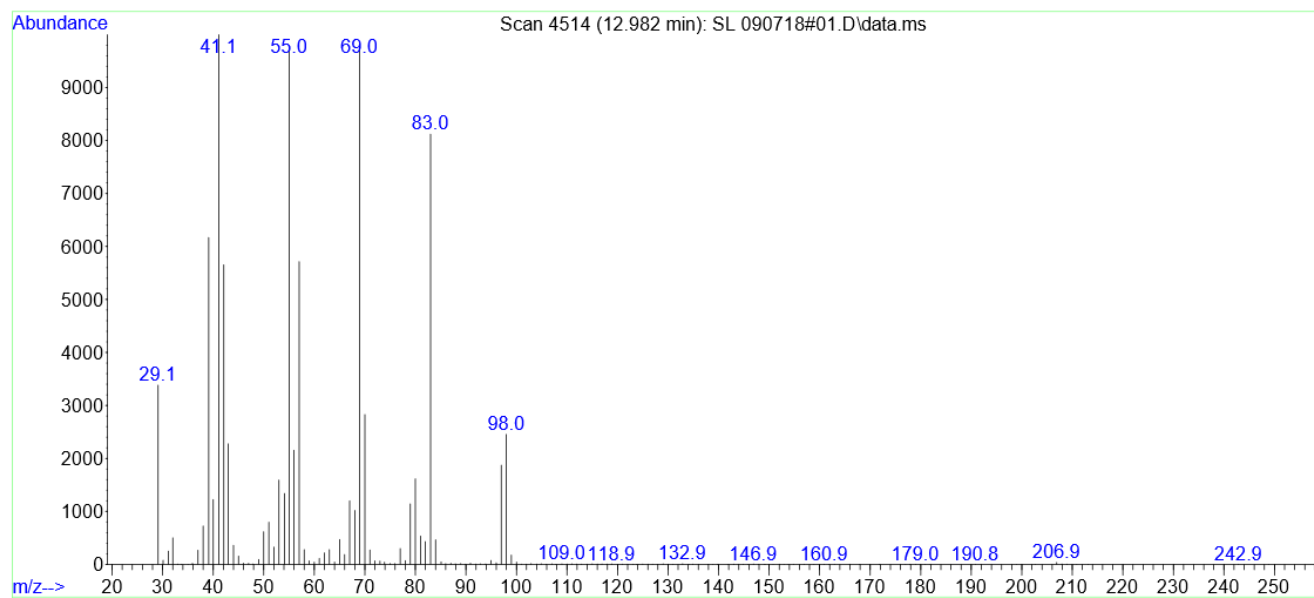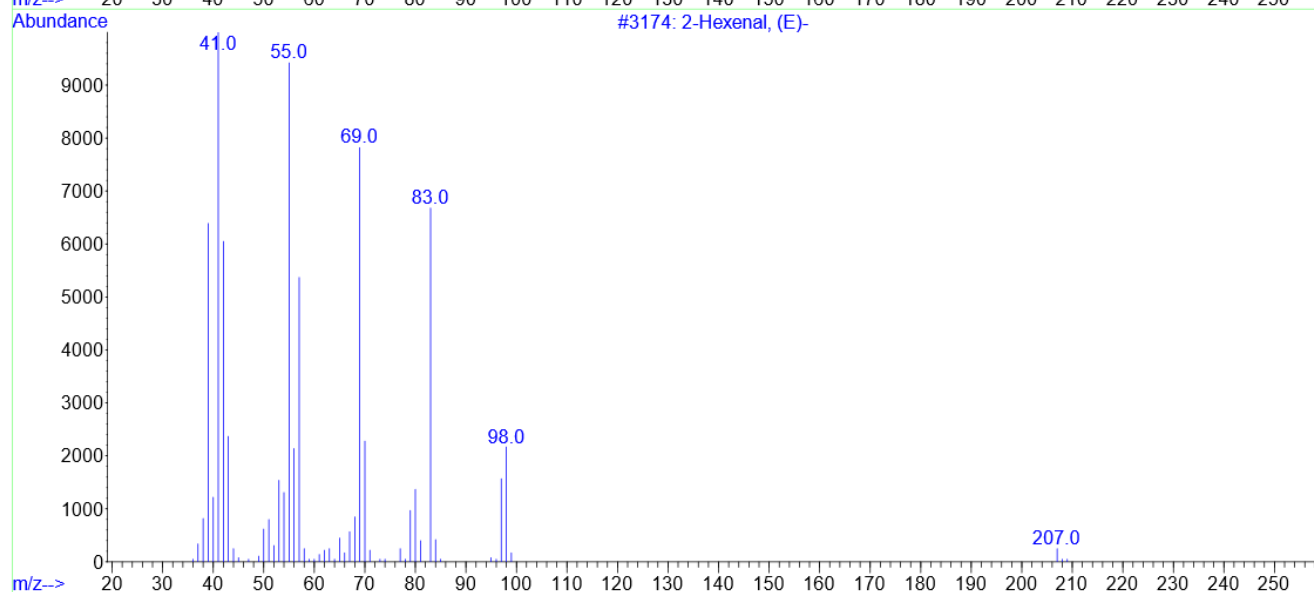

## 45. 4-heptenal

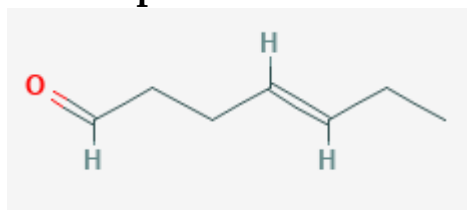

Library Searched : C:\Database\NIST11.L

Quality : 50

ID : 4-Heptenal, (Z)-

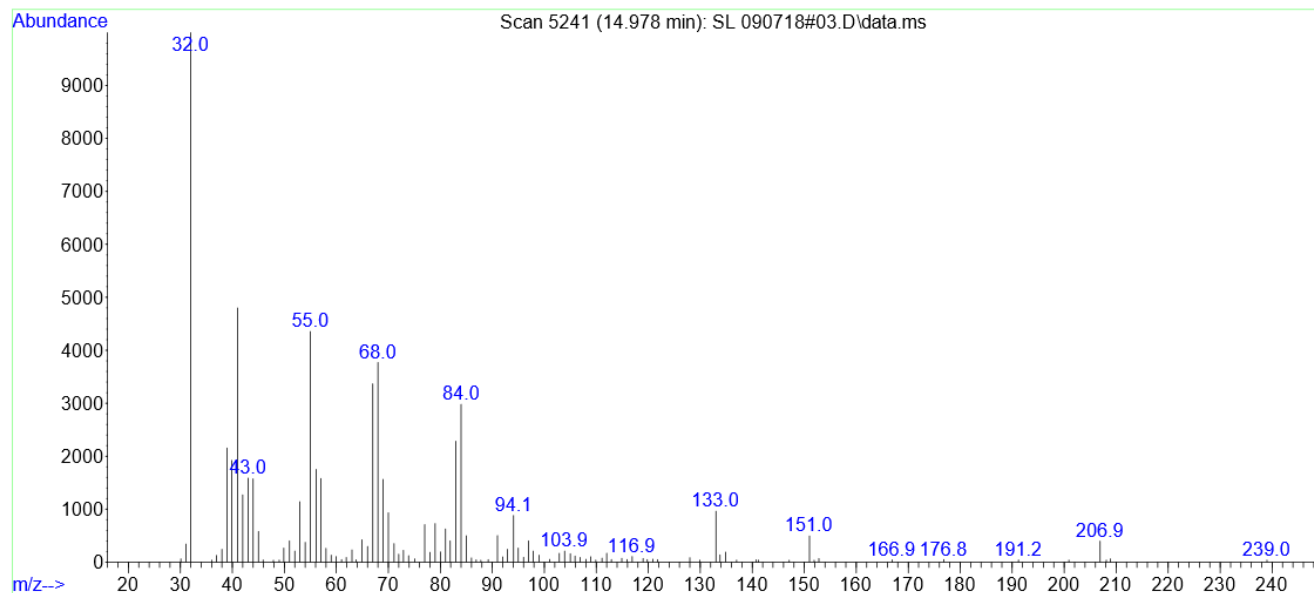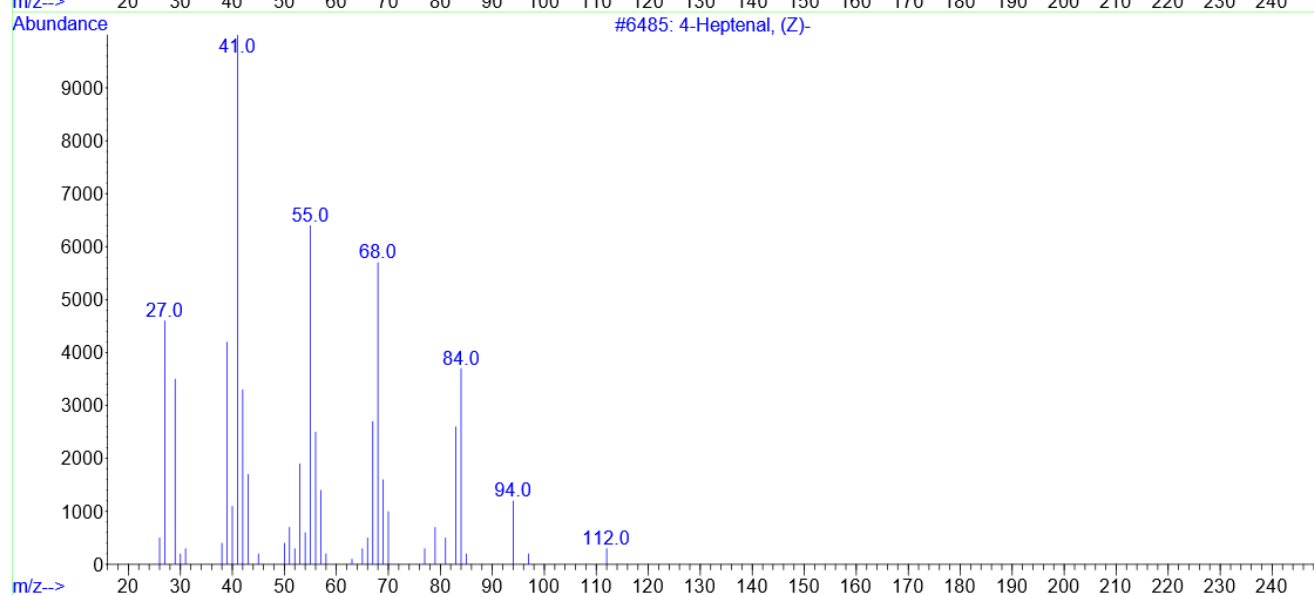

## 46. Heptanal

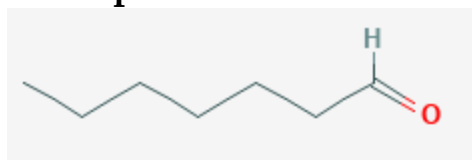

Library Searched : C:\Database\NIST11.L  
Quality : 92  
ID : Heptanal

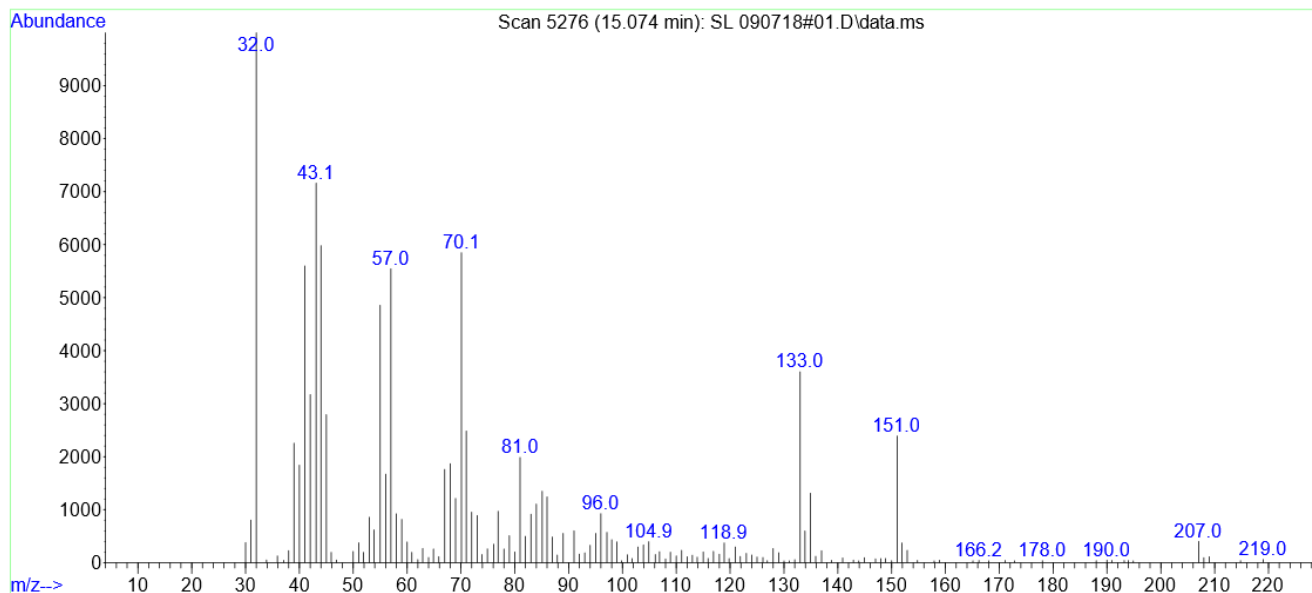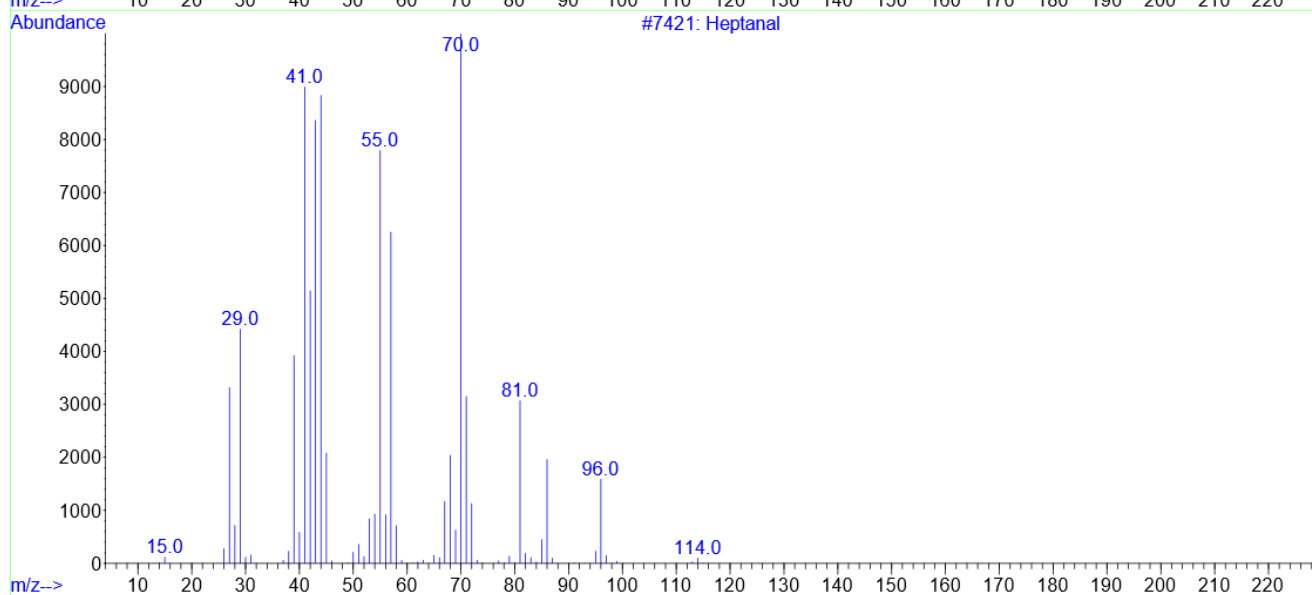



## 47. 2,4-hexadienal

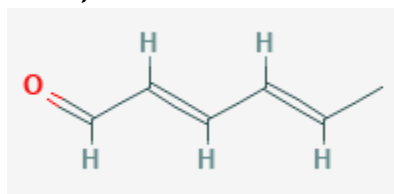

Library Searched : C:\Database\NIST11.L

Quality : 70

ID : 2,4-Hexadienal, (E,E)-

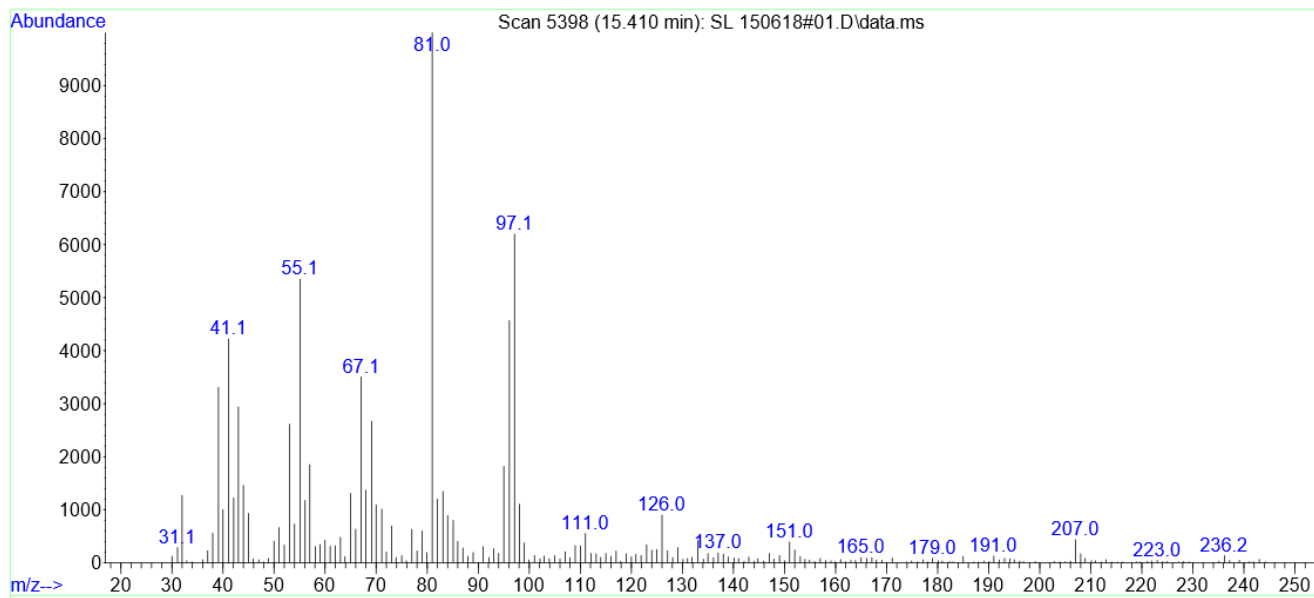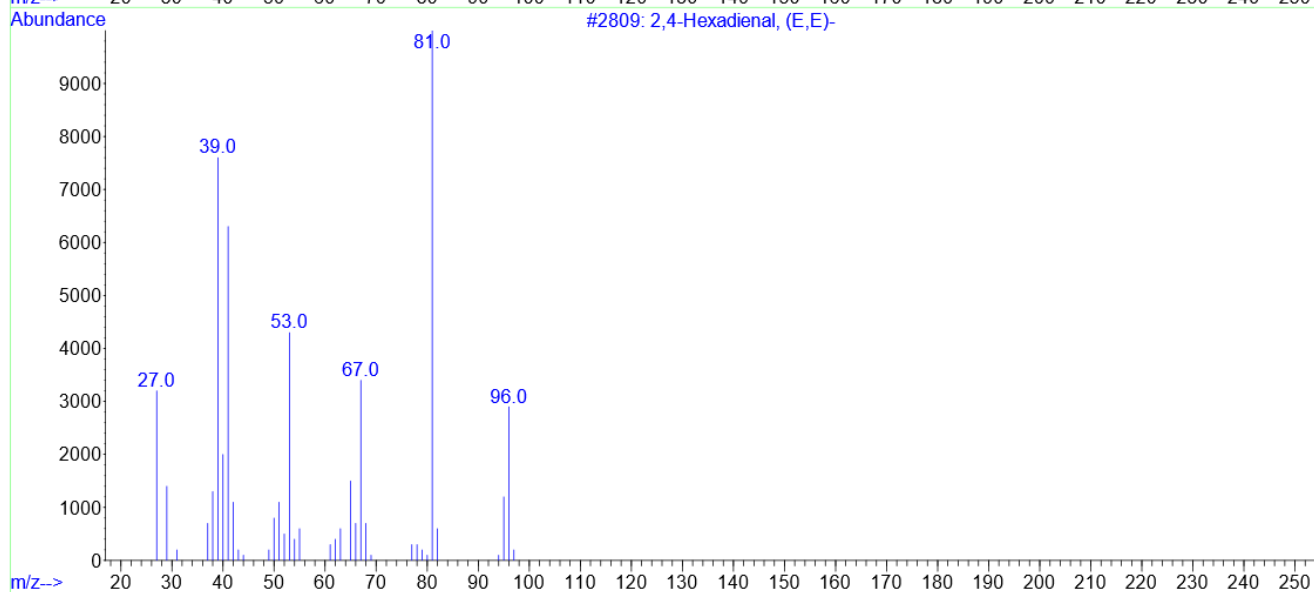

## 48. Benzaldehyde

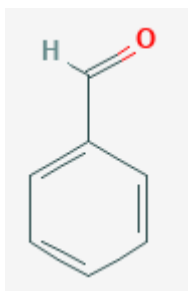

Library Searched : C:\Database\NIST11.L

Quality : 95

ID : Benzaldehyde

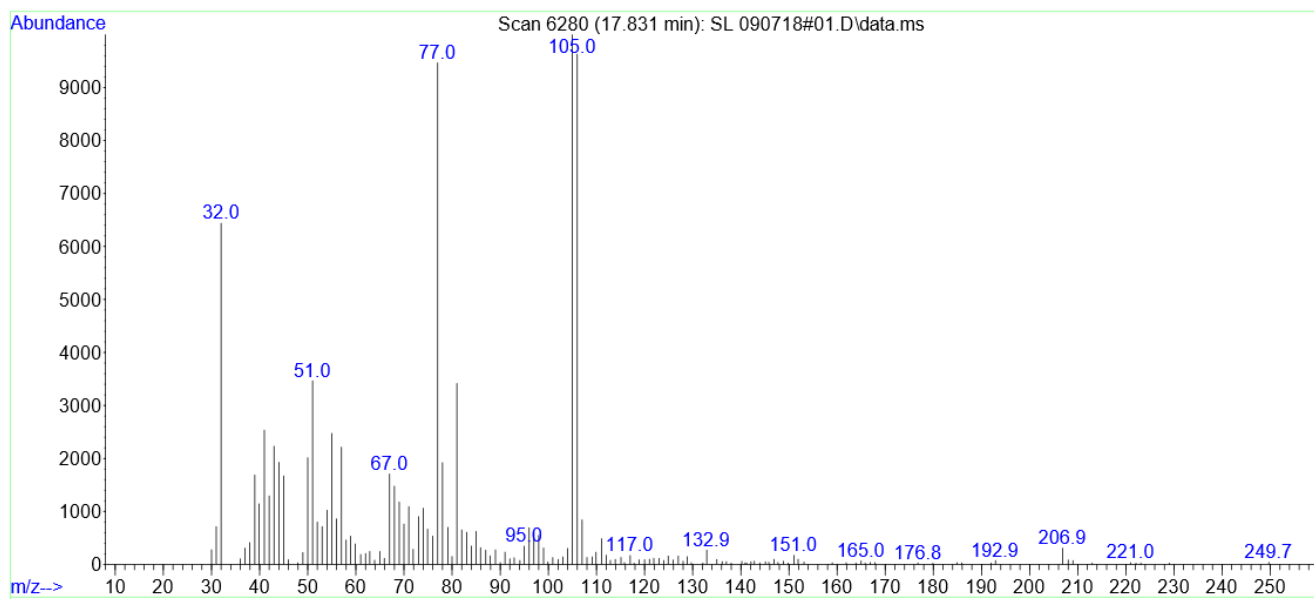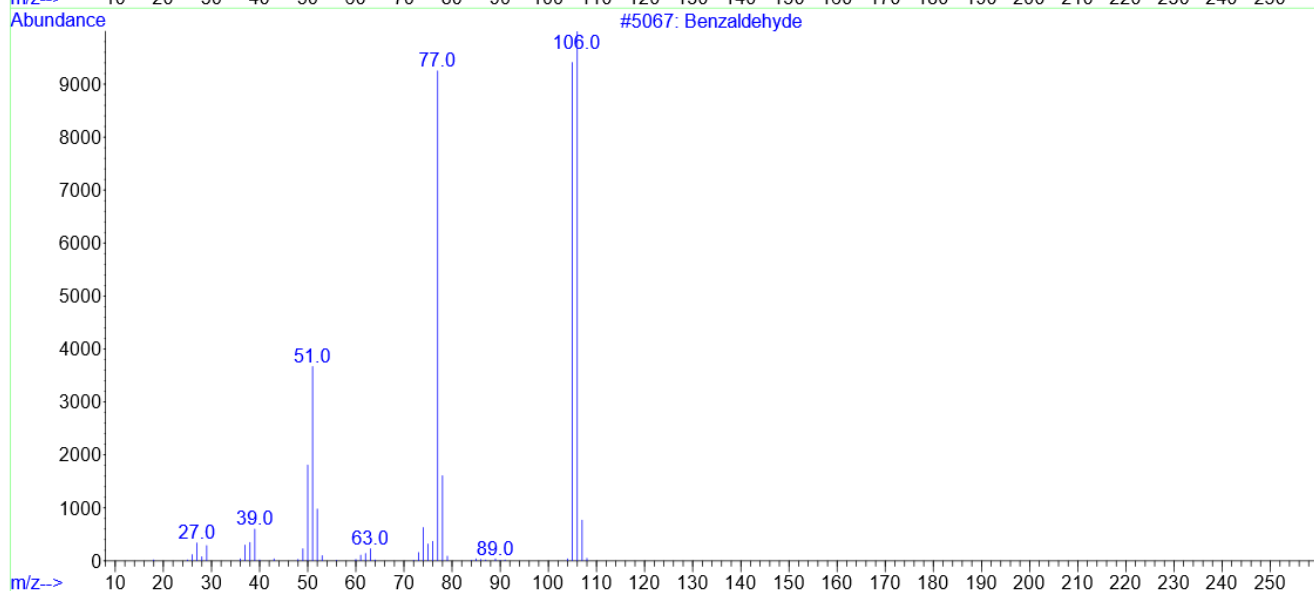

## 49. 2,4-heptadienal isomer 1

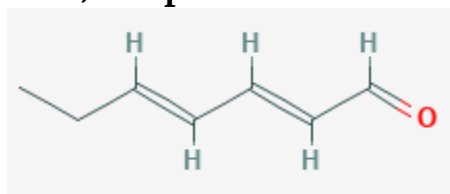

Library Searched : C:\Database\NIST11.L

Quality : 93

ID : 2,4-Heptadienal, (E,E)-

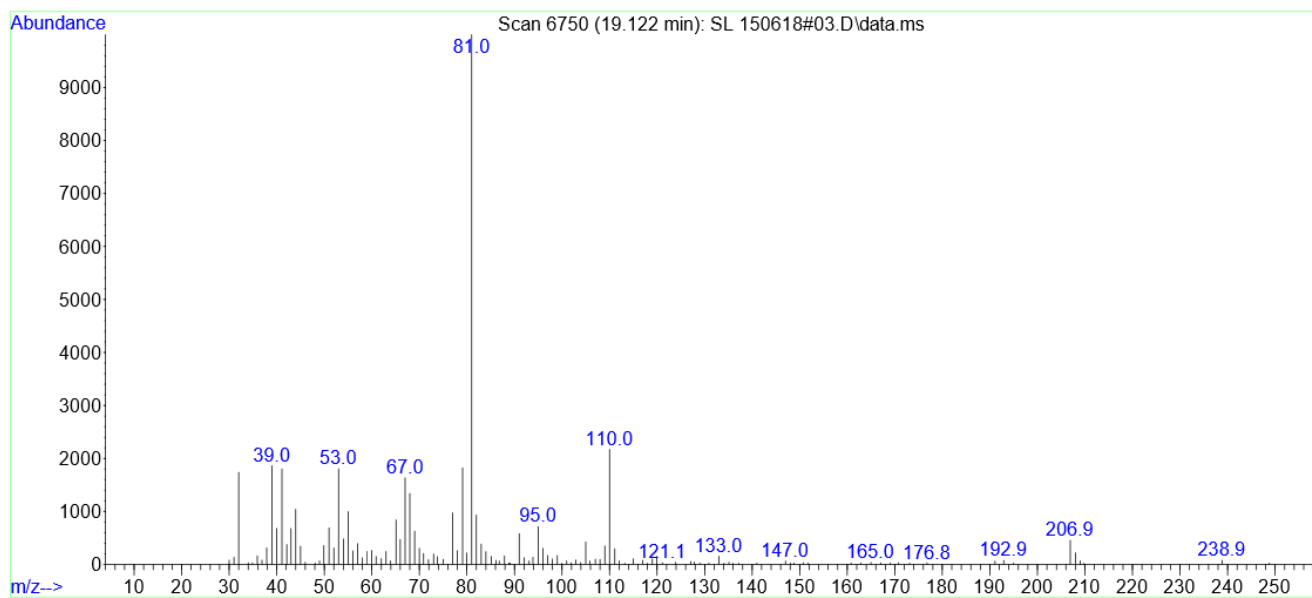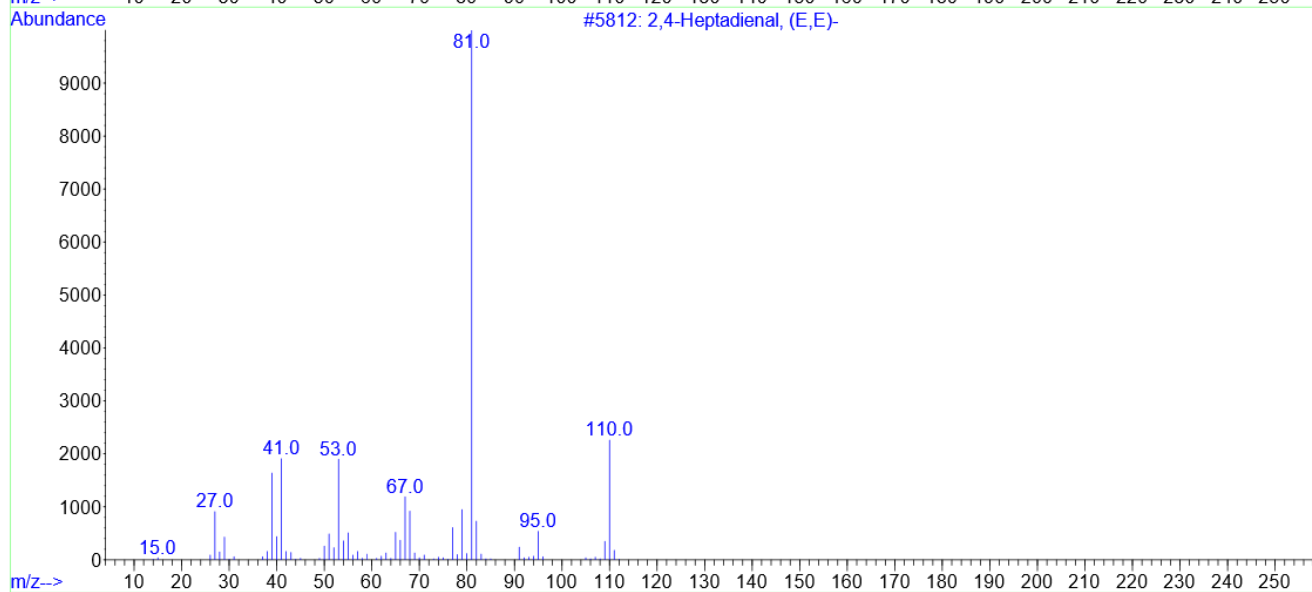

## 50. Octanal

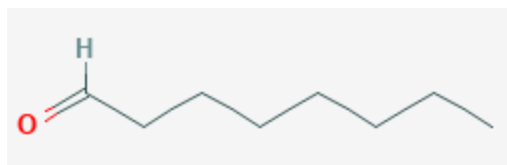

Library Searched : C:\Database\Adams.L

Quality : 90

ID : 7.72 Octanal<n->

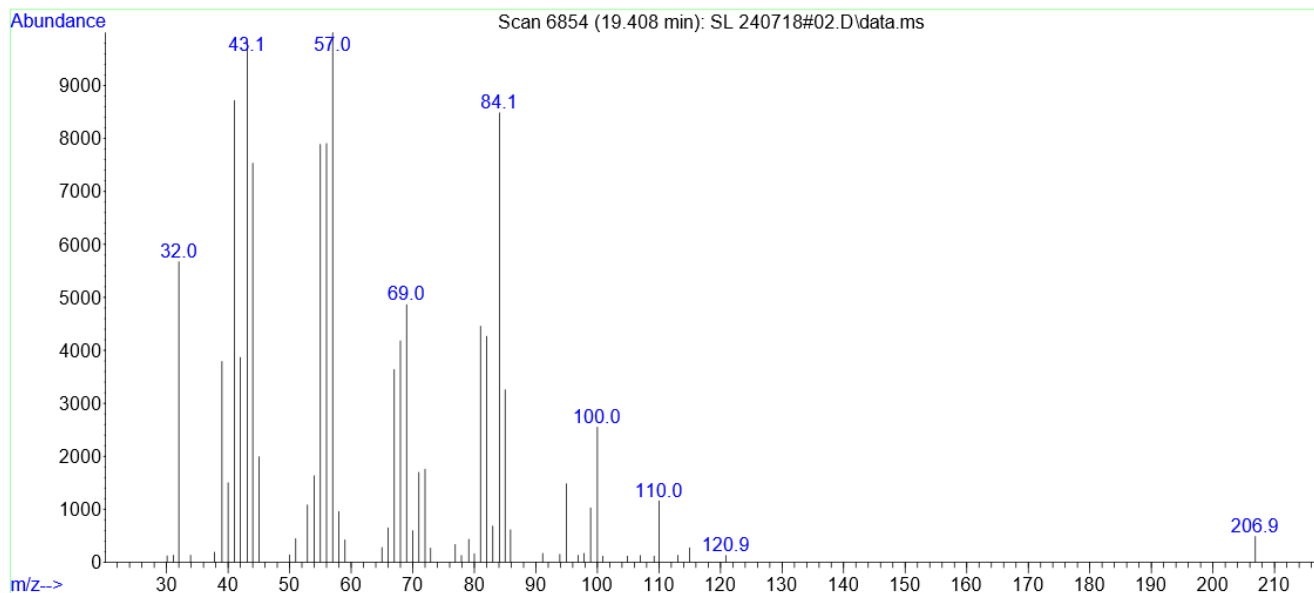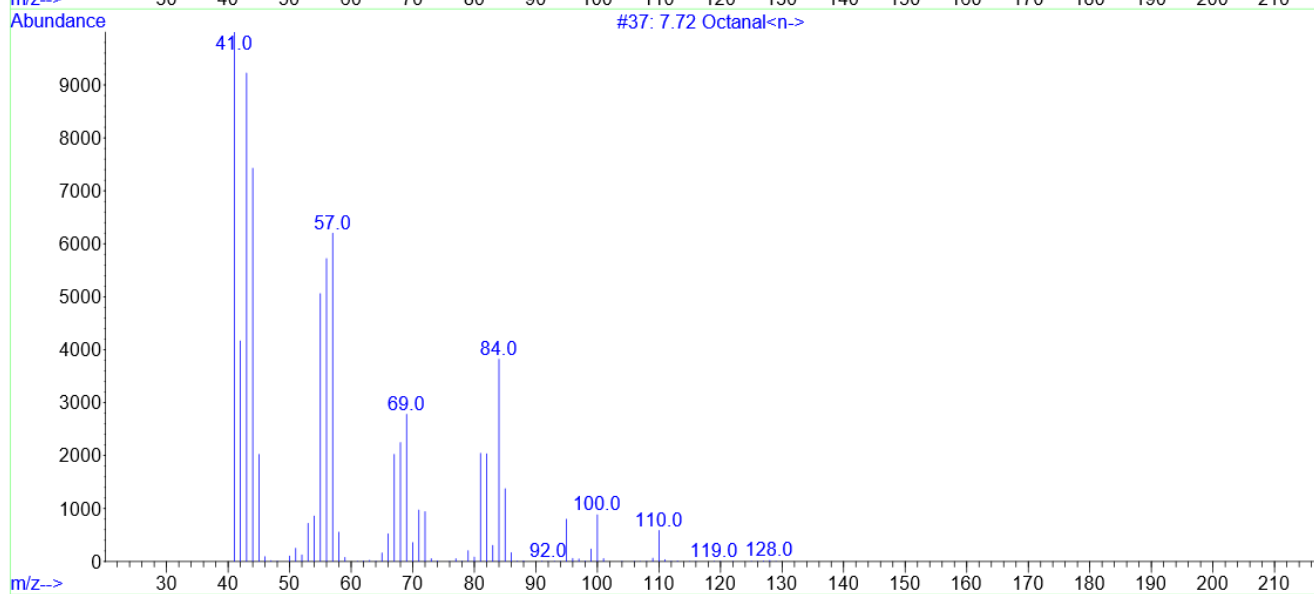

## 51. 2,4-heptadienal isomer 2

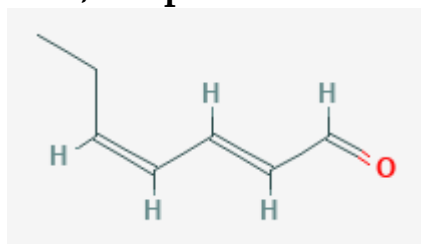

Library Searched : C:\Database\NIST11.L

Quality : 95

ID : 2,4-Heptadienal, (E,E)-

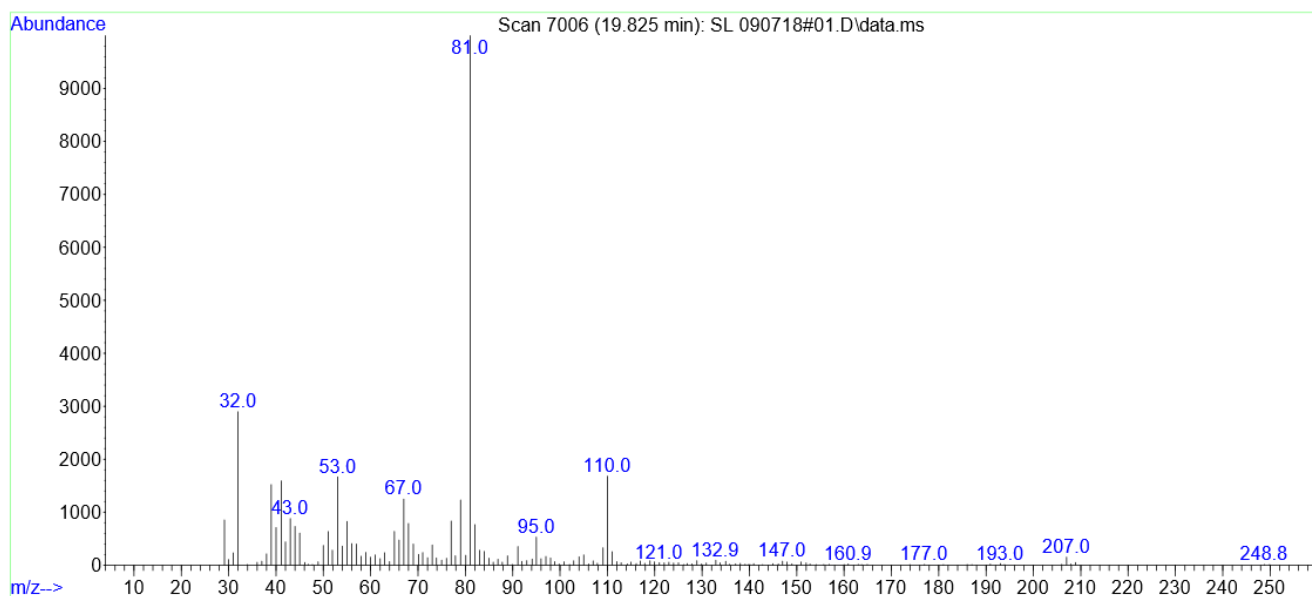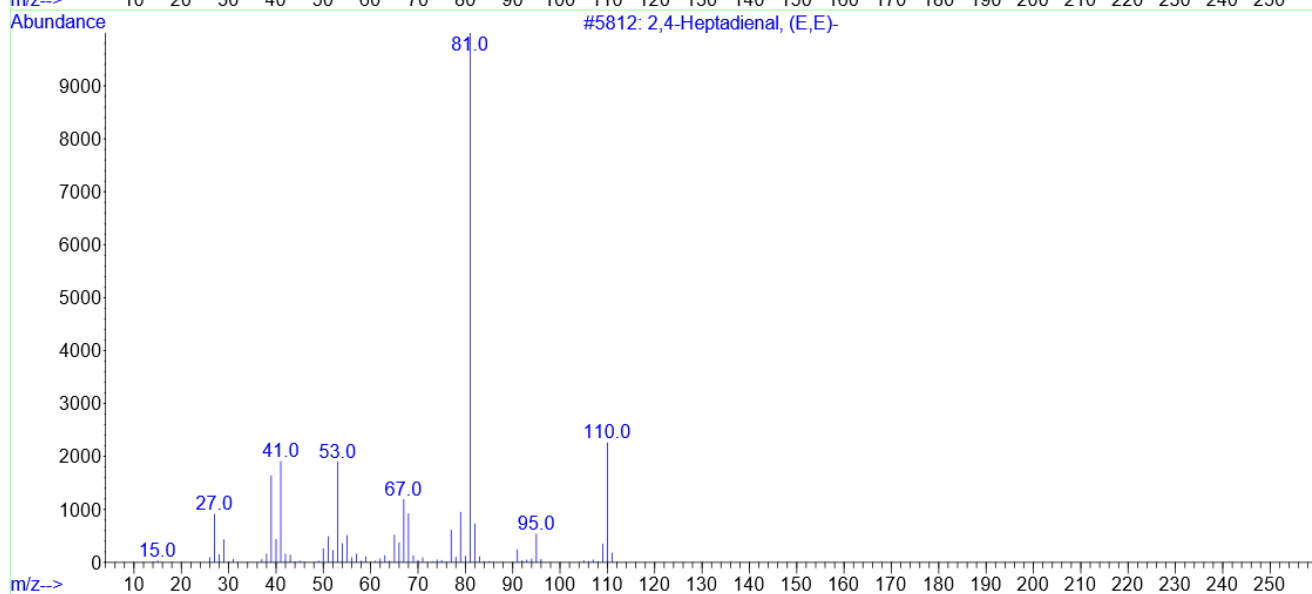

## 52. Phenylacetaldehyde

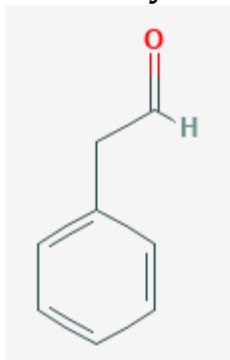

Library Searched : C:\Database\NIST11.L  
Quality : 94  
ID : Benzeneacetaldehyde

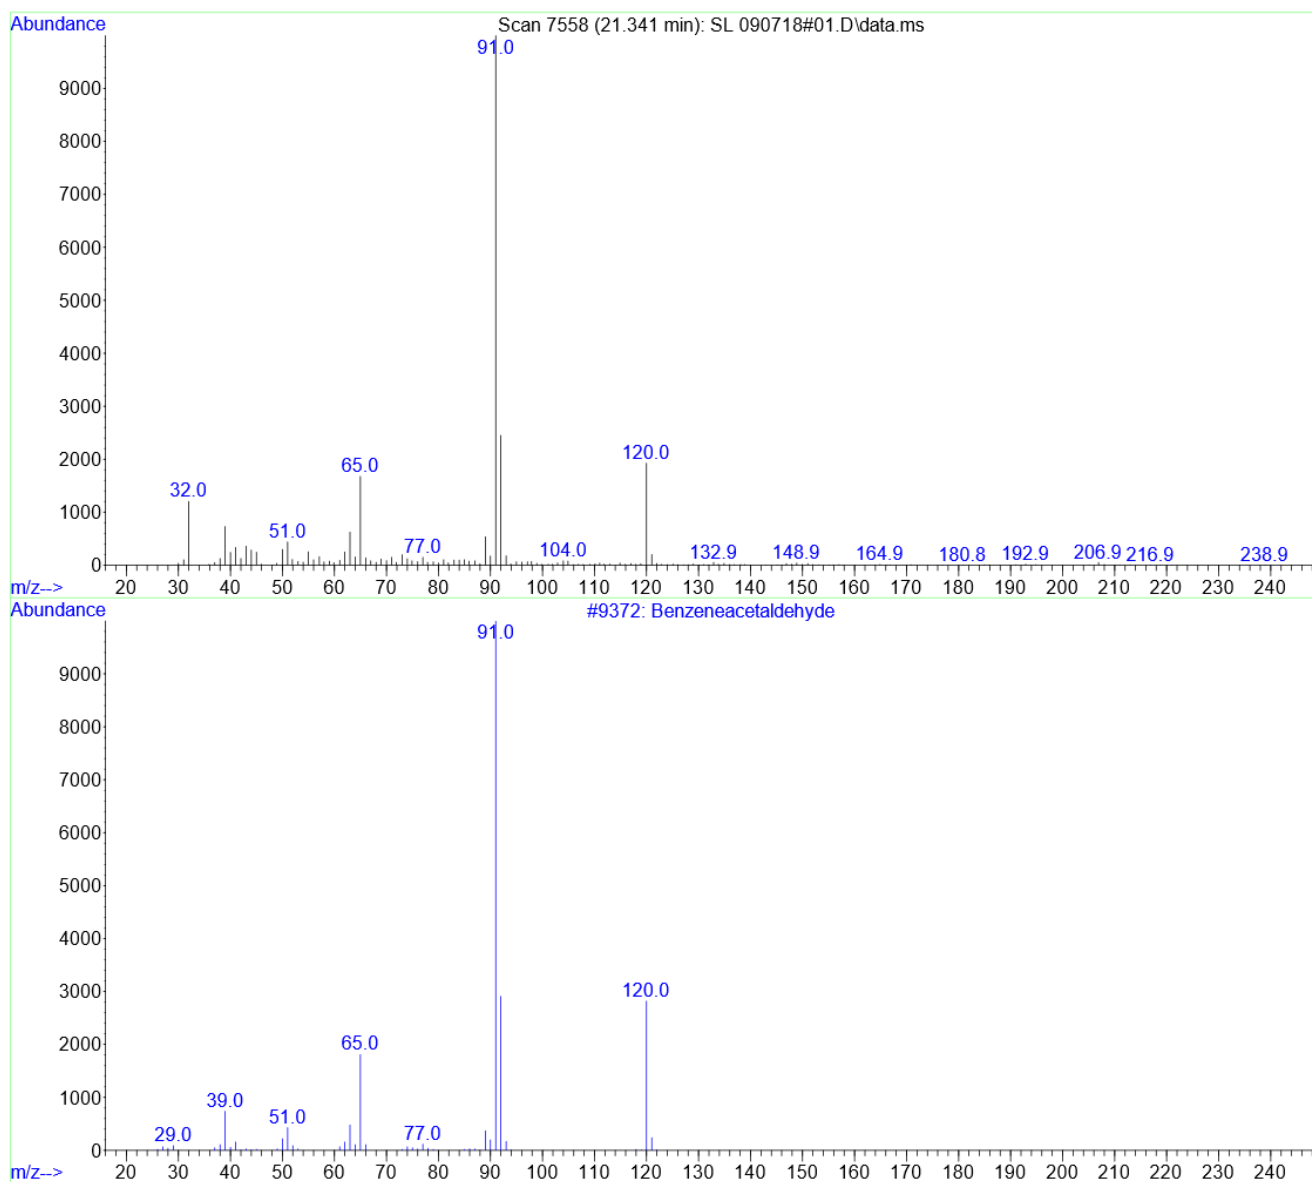

## 53. 2-octenal

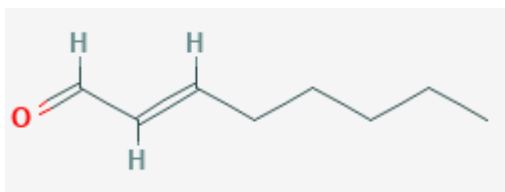

Library Searched : C:\Database\NIST11.L

Quality : 91

ID : 2-Octenal, (E)-

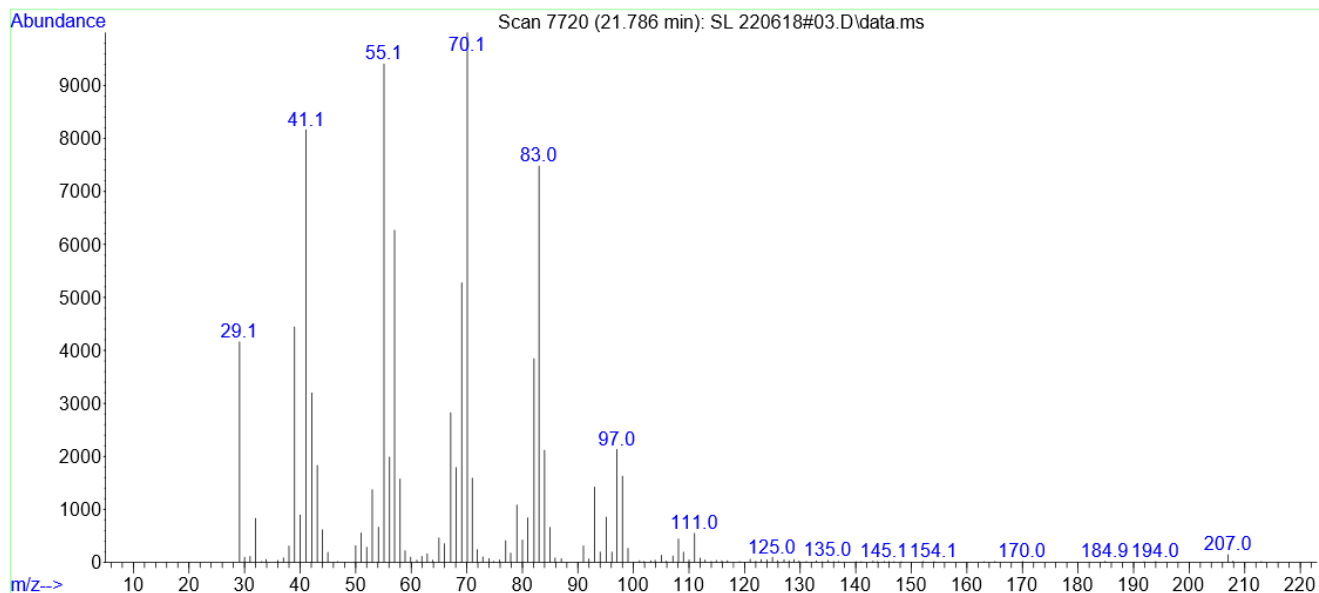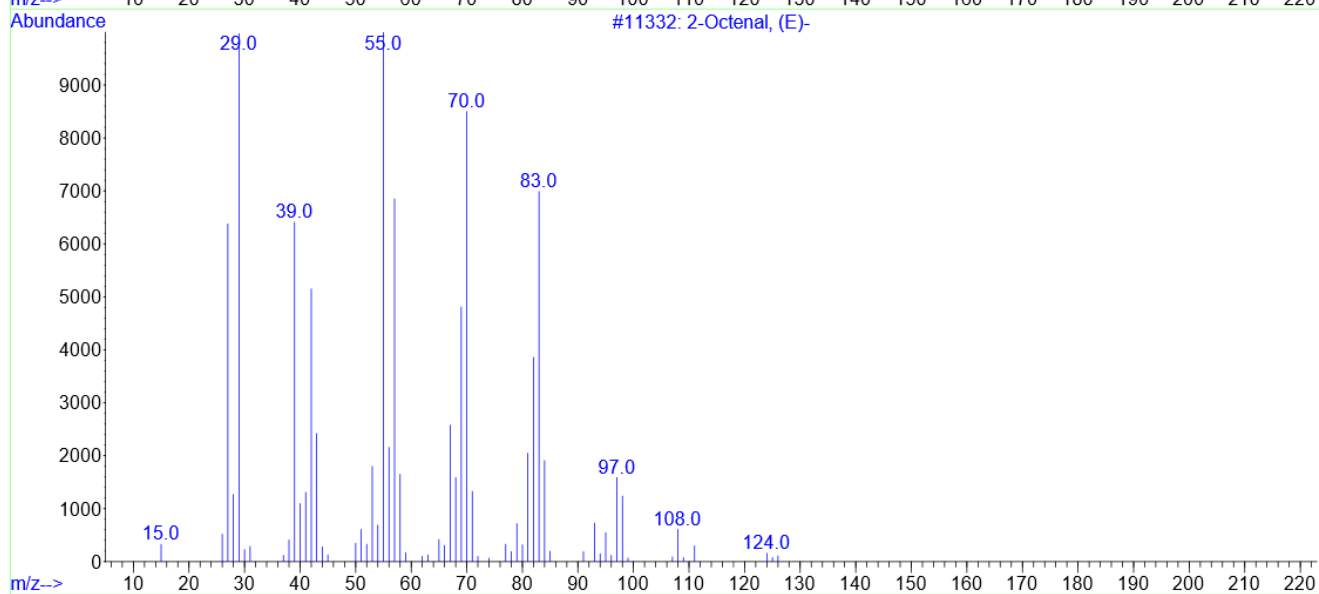

## 54. Nonanal

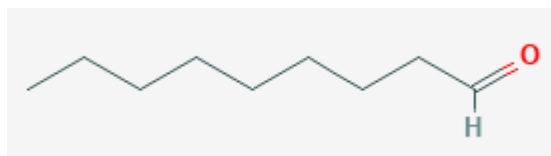

Library Searched : C:\Database\NIST11.L  
Quality : 91  
ID : Nonanal

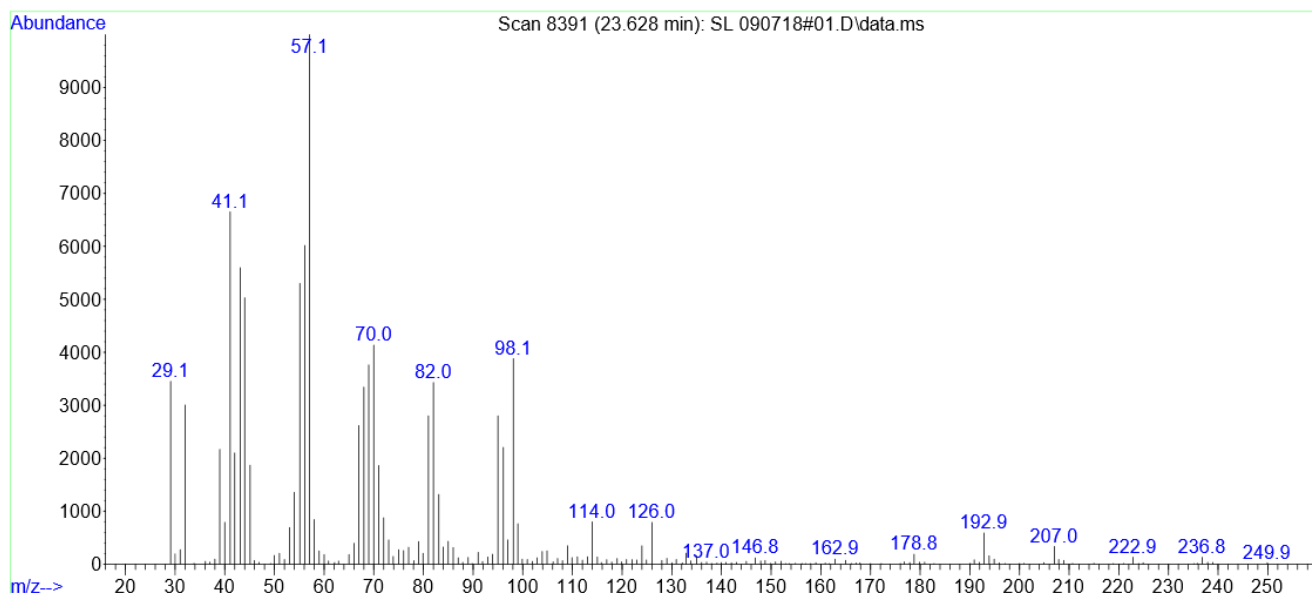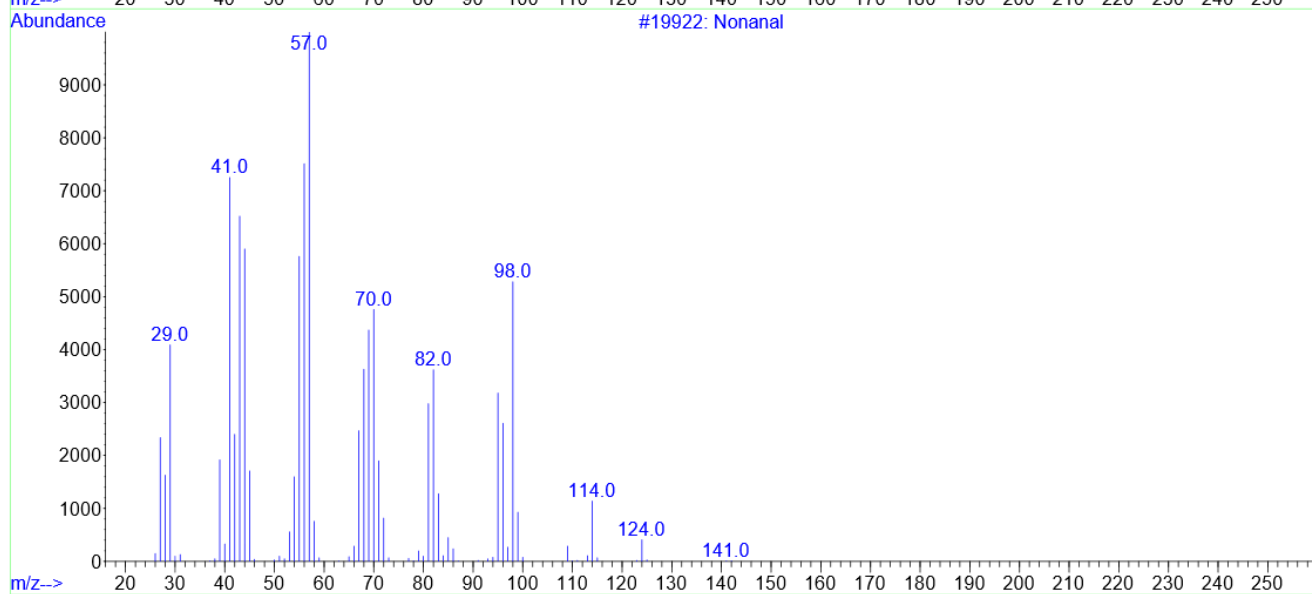



## 55. Decanal

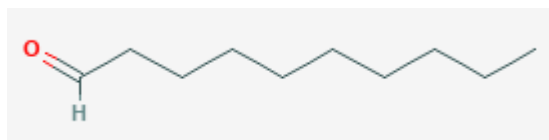

Library Searched : C:\Database\NIST11.L  
Quality : 93  
ID : Decanal

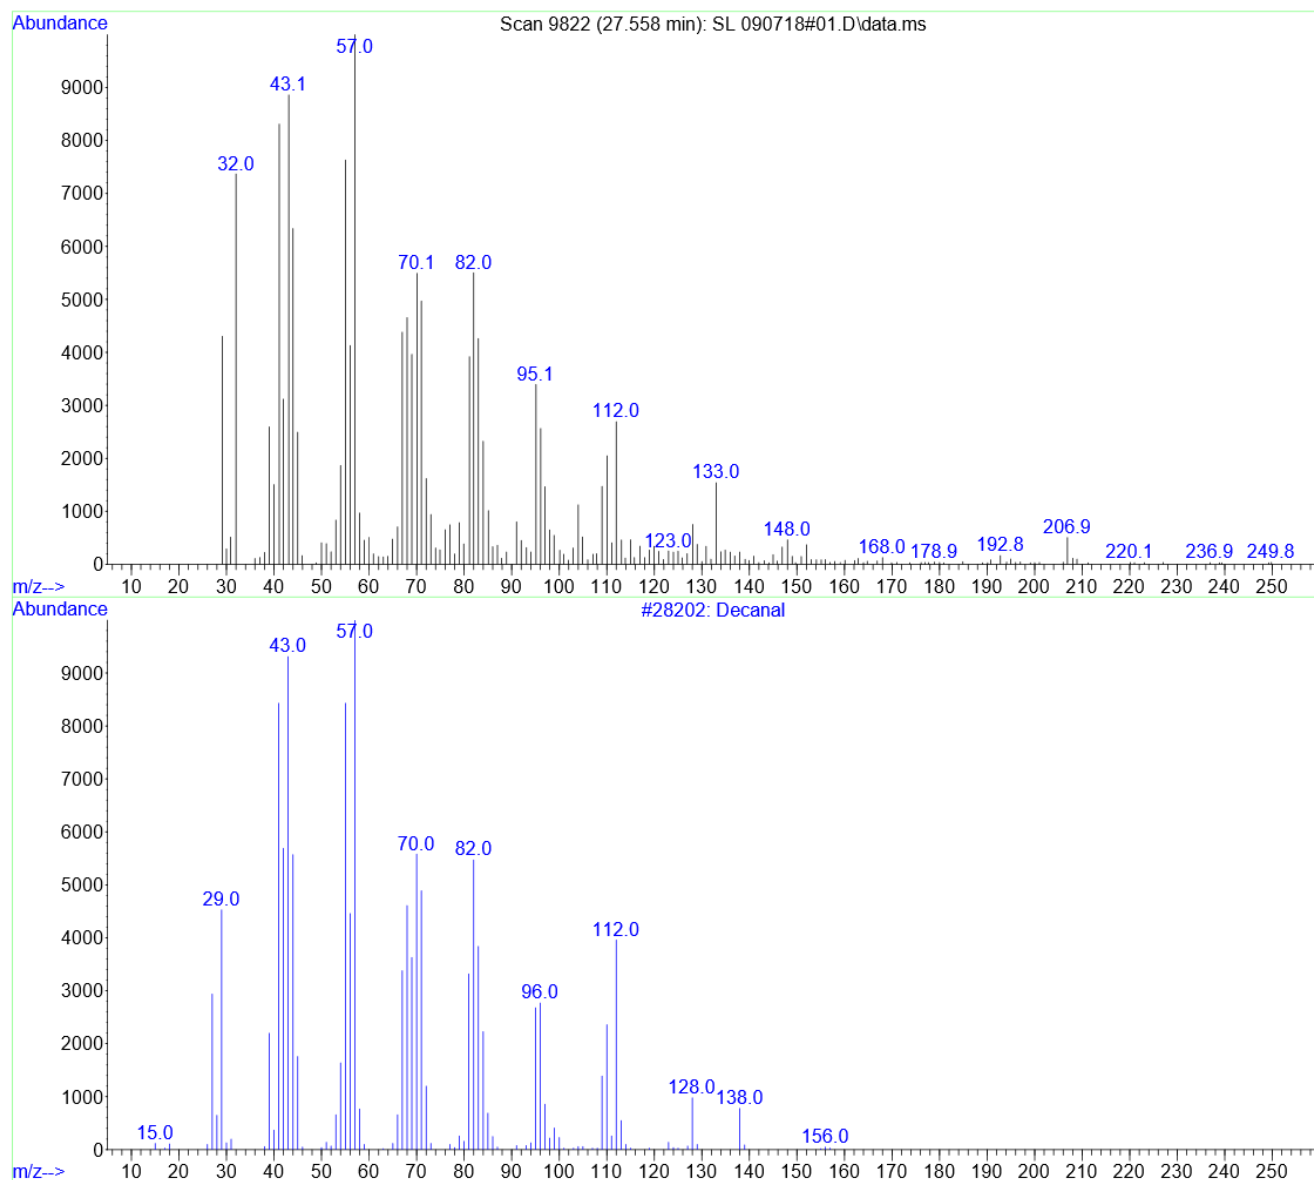

## 56. Vanillin

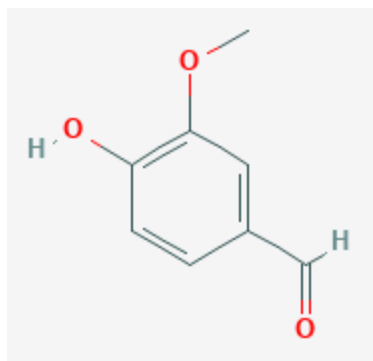

Library Searched : C:\Database\NIST11.L  
Quality : 83  
ID : Vanillin

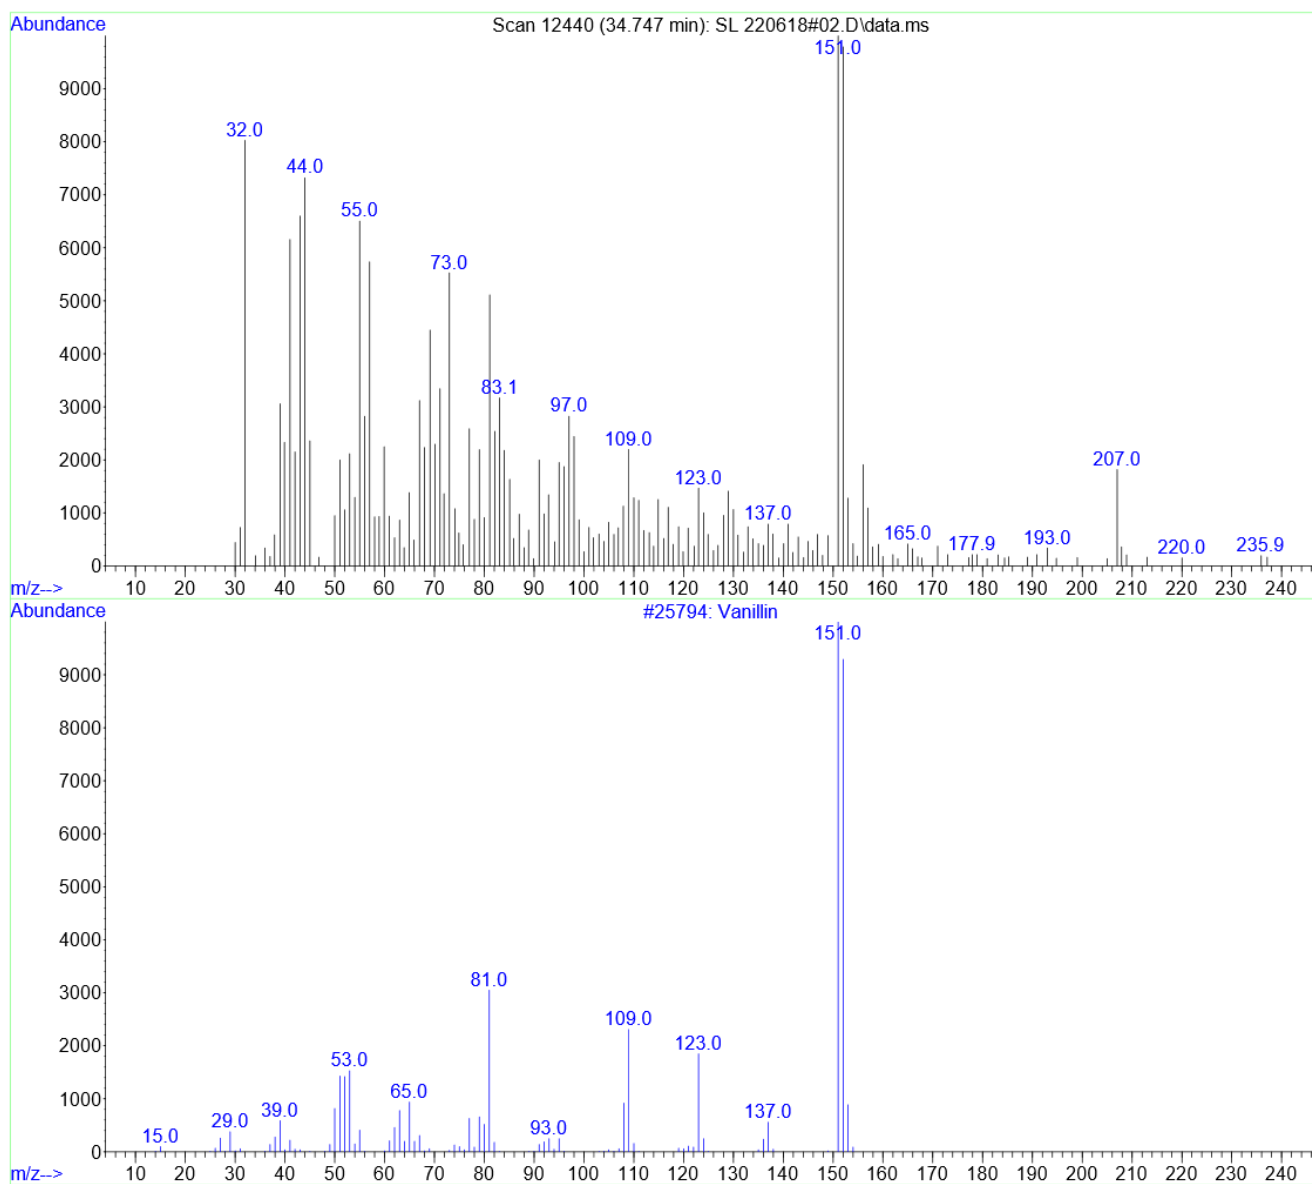

## 57. (Z)-pent-2-en-1-yl acetate

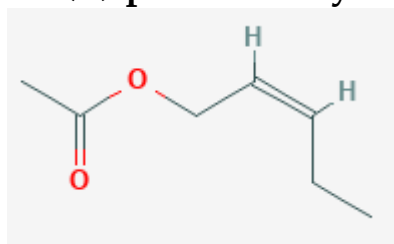

Library Searched : C:\Database\NIST11.L

Quality : 64

ID : 2-Penten-1-ol, acetate, (Z)-

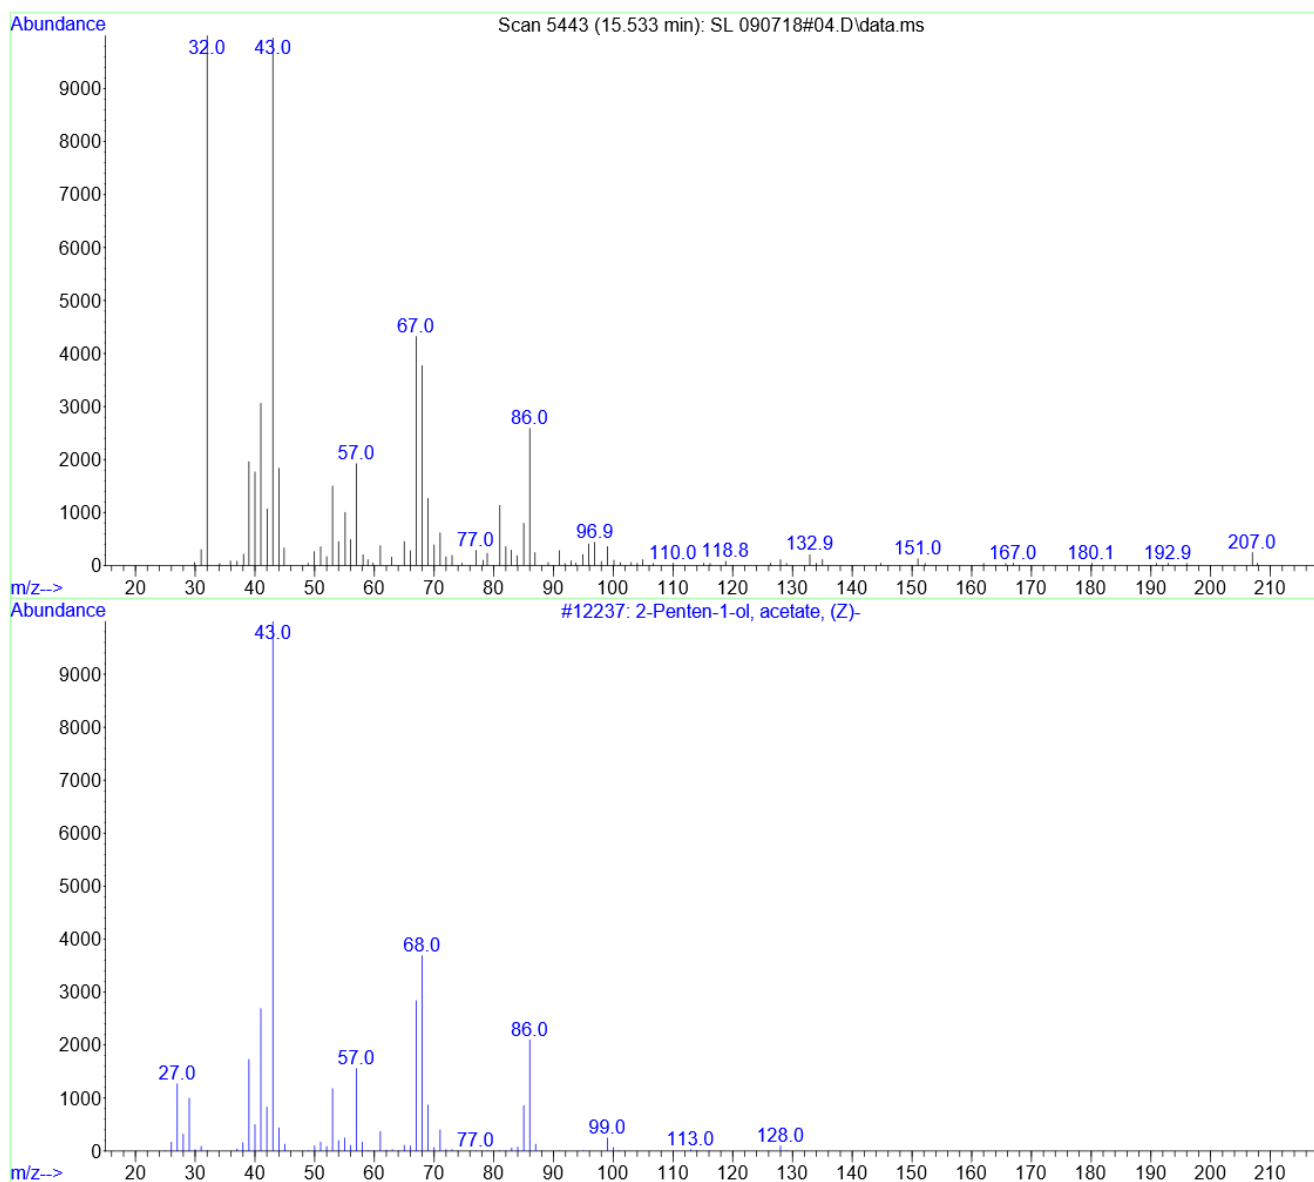

## 58. 3-hexenyl acetate

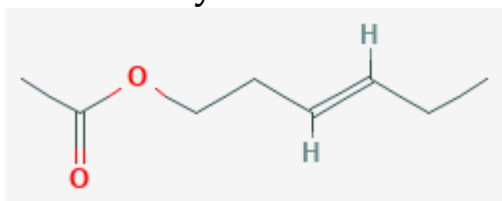

Library Searched : C:\Database\NIST11.L

Quality : 90

ID : 3-Hexen-1-ol, acetate, (Z)-

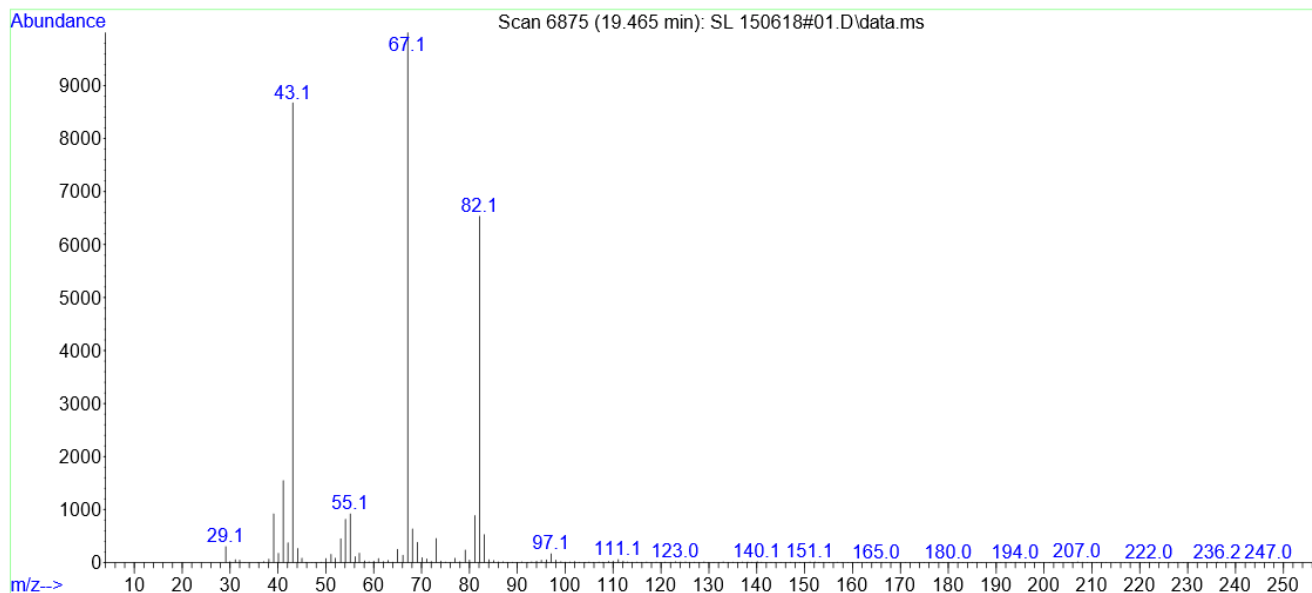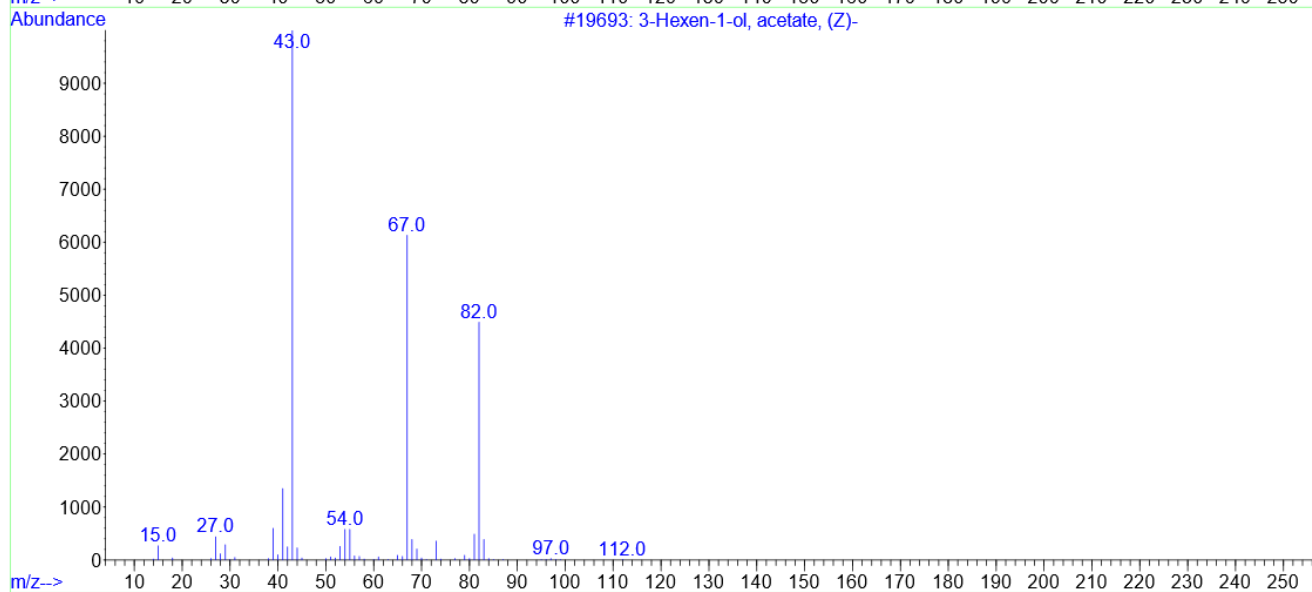

## 59. (Z)-3-hexenyl butanoate

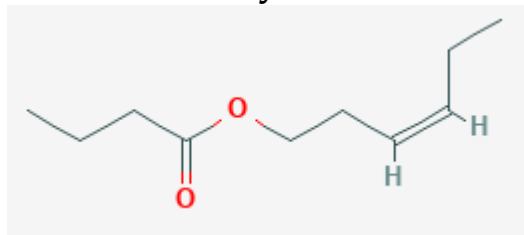

Library Searched : C:\Database\NIST11.L

Quality : 90

ID : Butanoic acid, 3-hexenyl ester, (Z)-

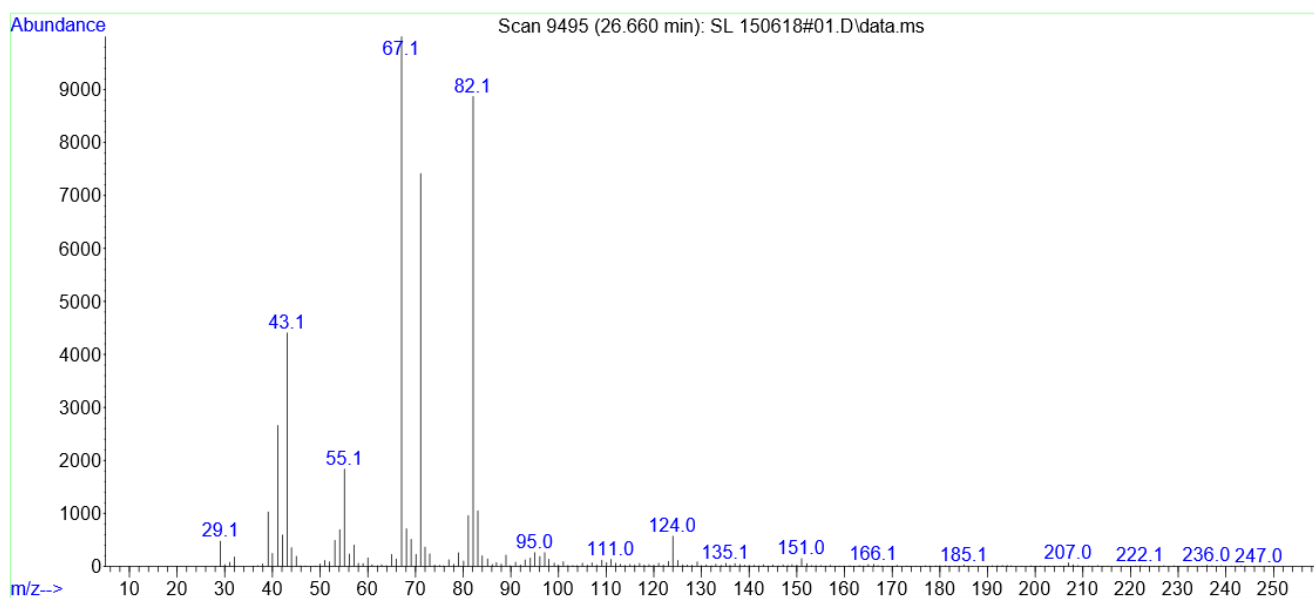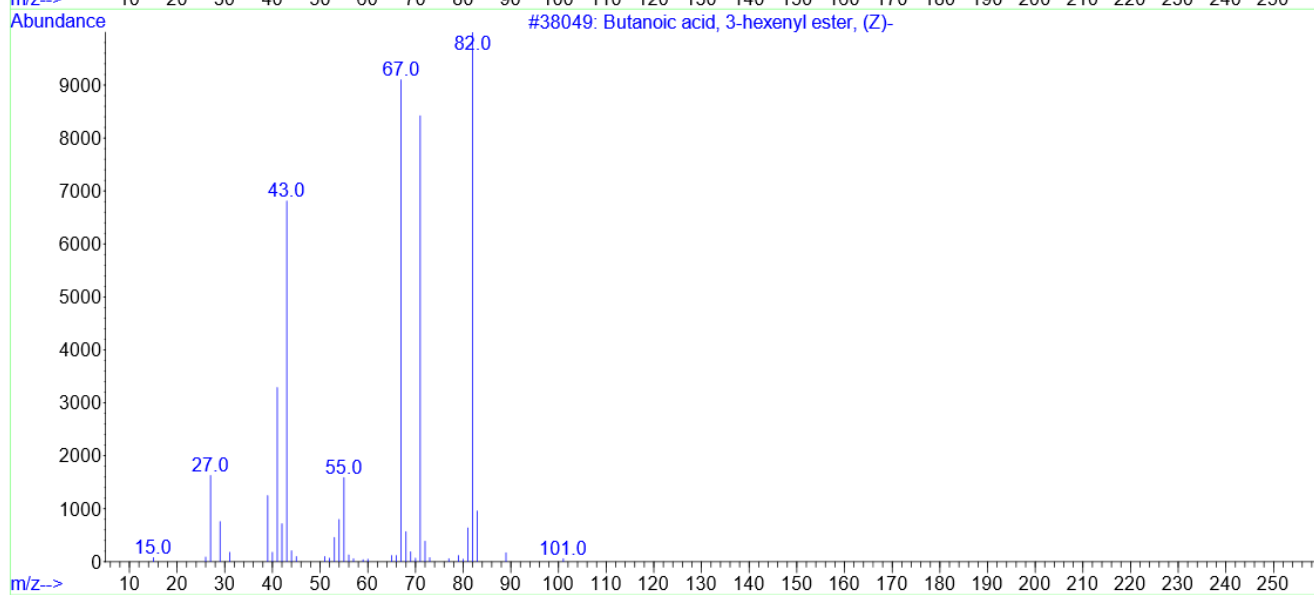

## 60. Methyl salicylate

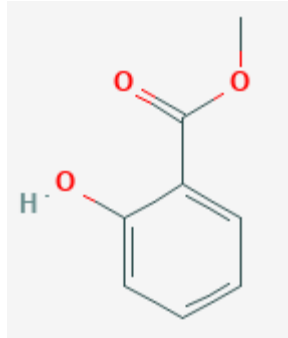

Library Searched : C:\Database\Adams.L

Quality : 89

ID : 15.35 Methyl salicylate

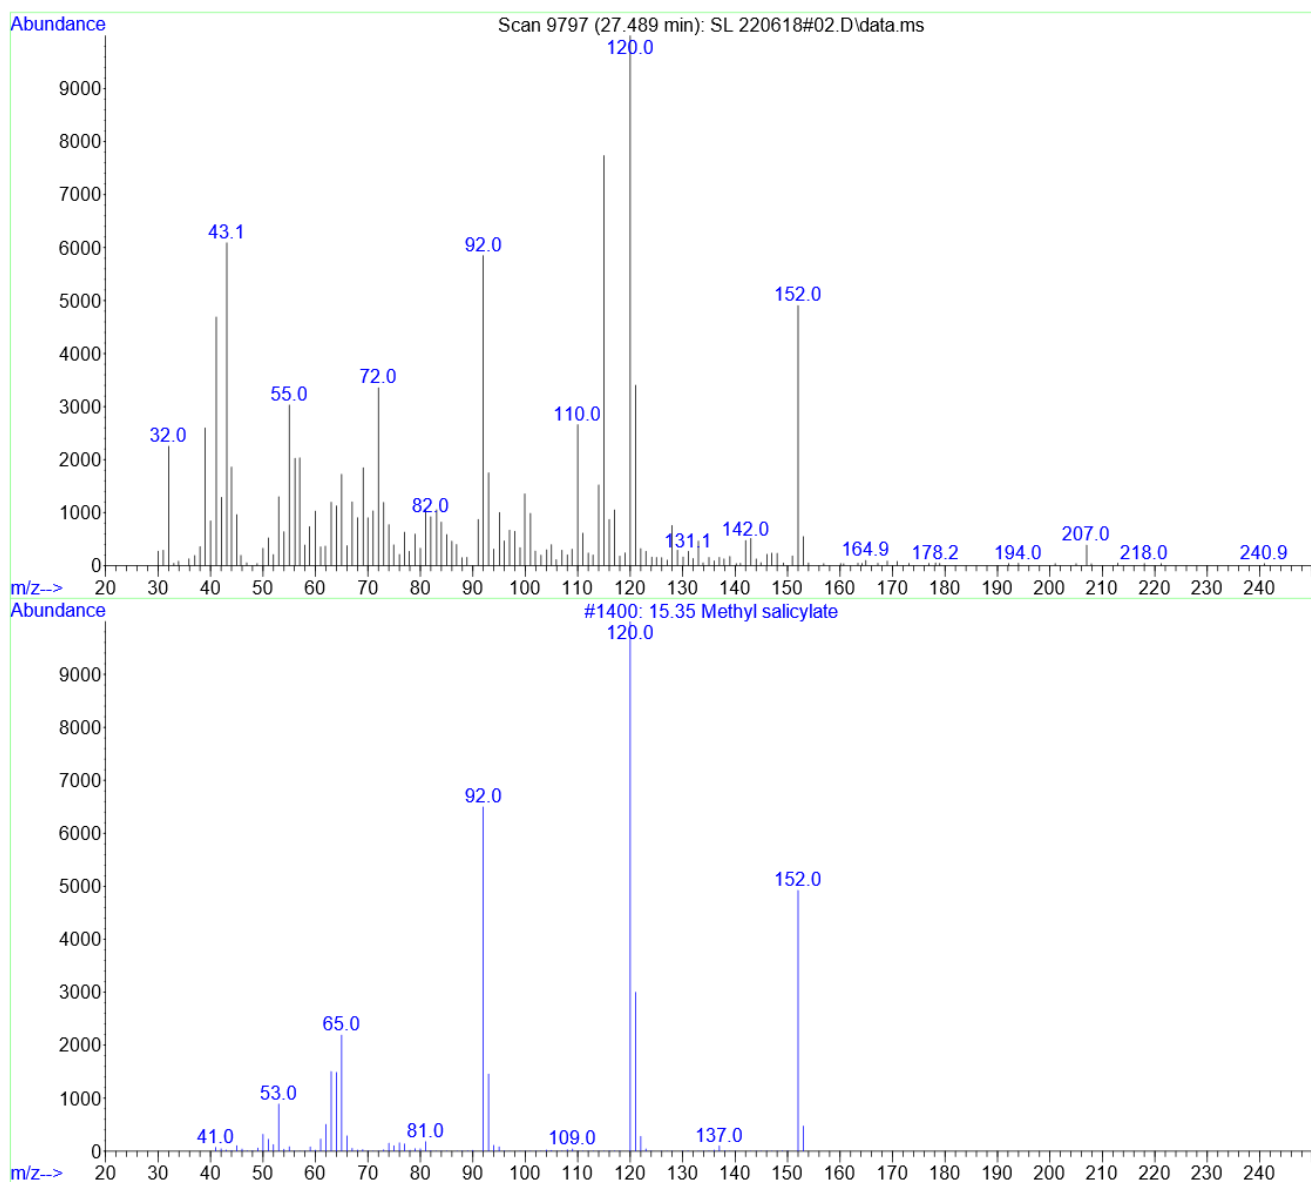

## 61. Ethyl decanoate

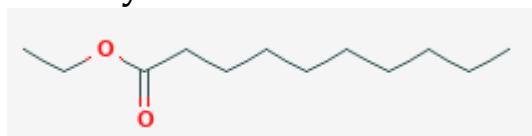

Library Searched : C:\Database\NIST11.L  
Quality : 90  
ID : Decanoic acid, ethyl ester

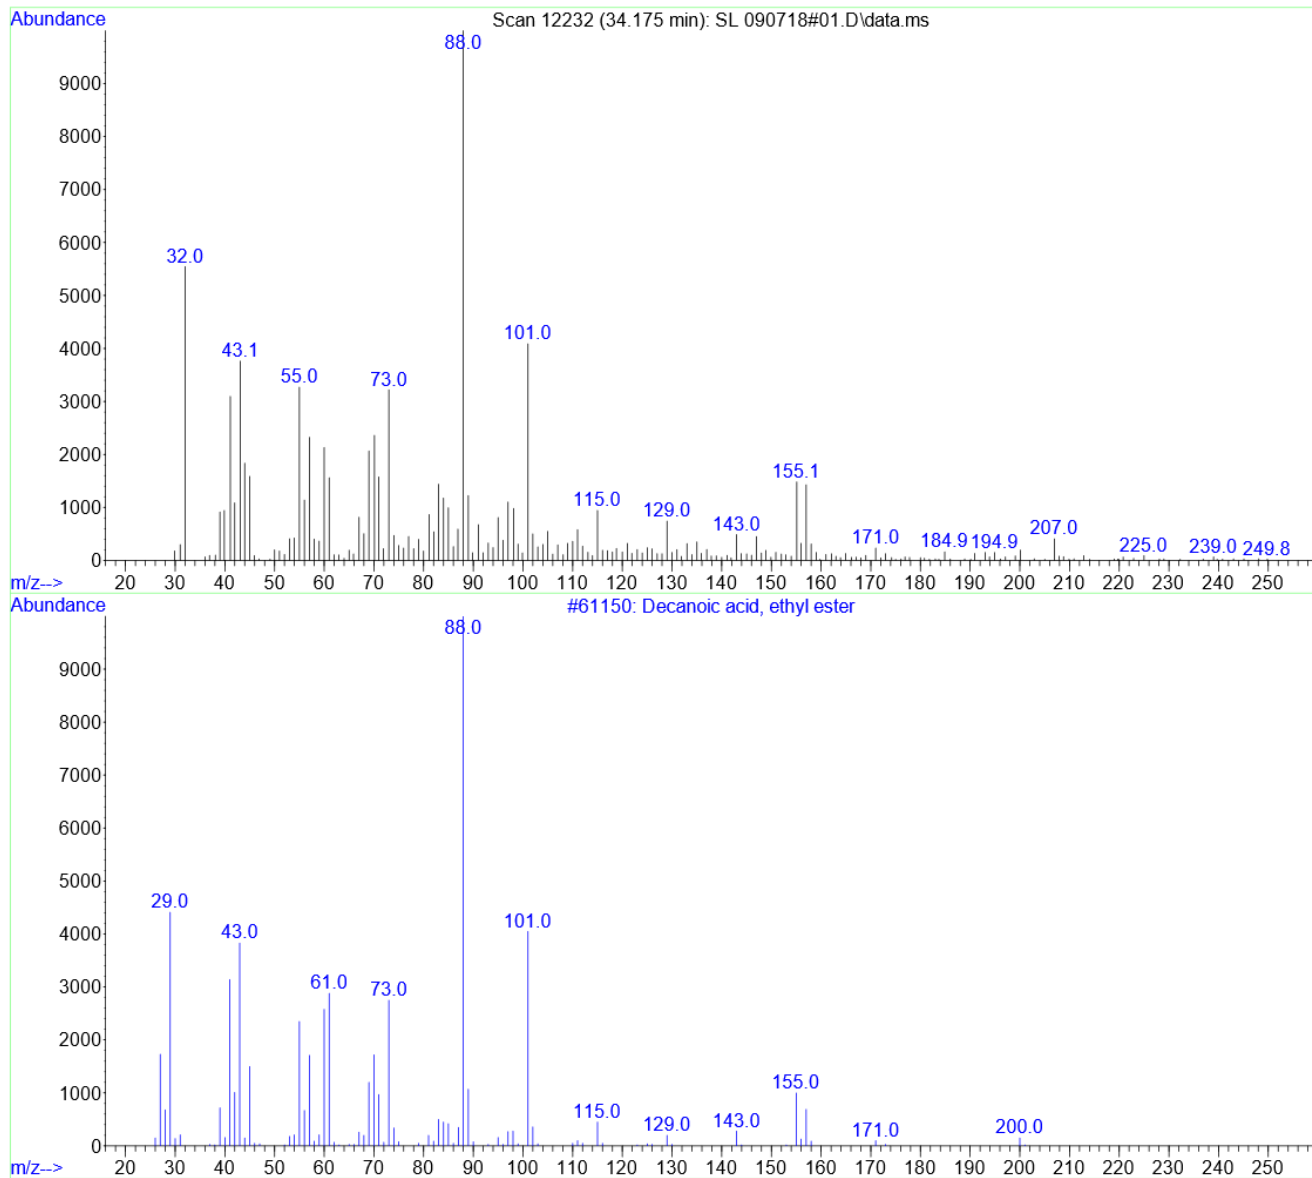

## 62. Methyl dodecanoate

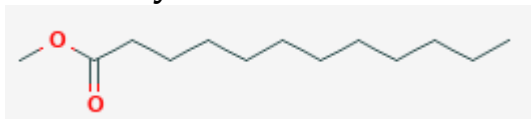

Library Searched : C:\Database\Adams.L

Quality : 93

ID : 29.82 Methyl dodecanoate

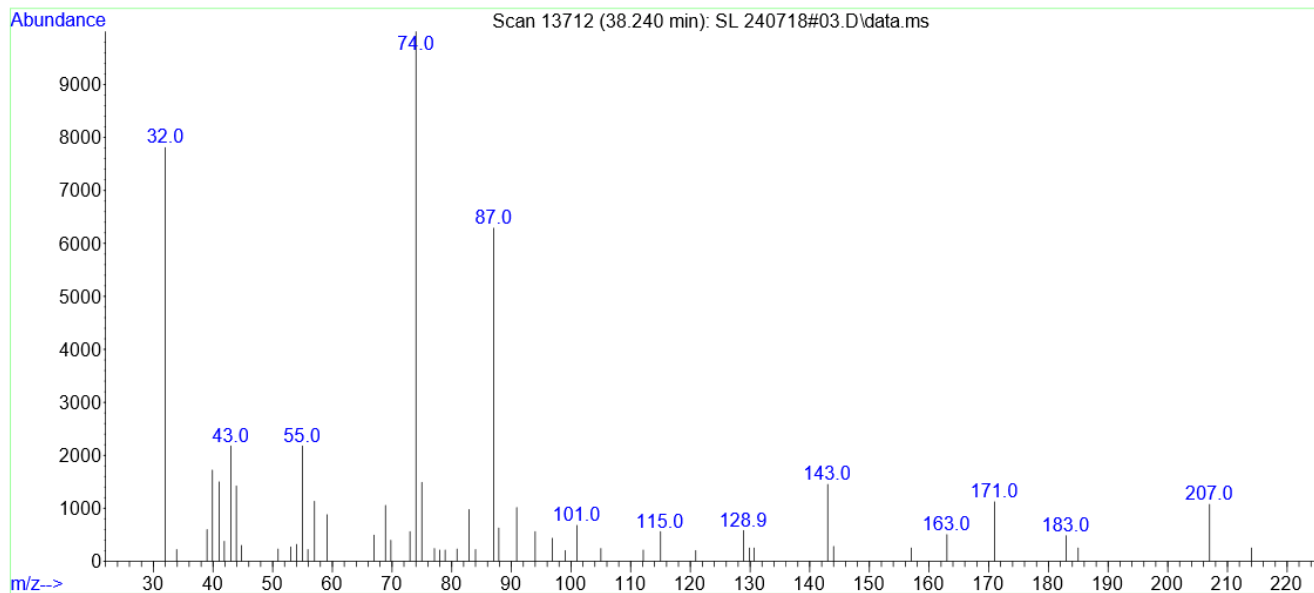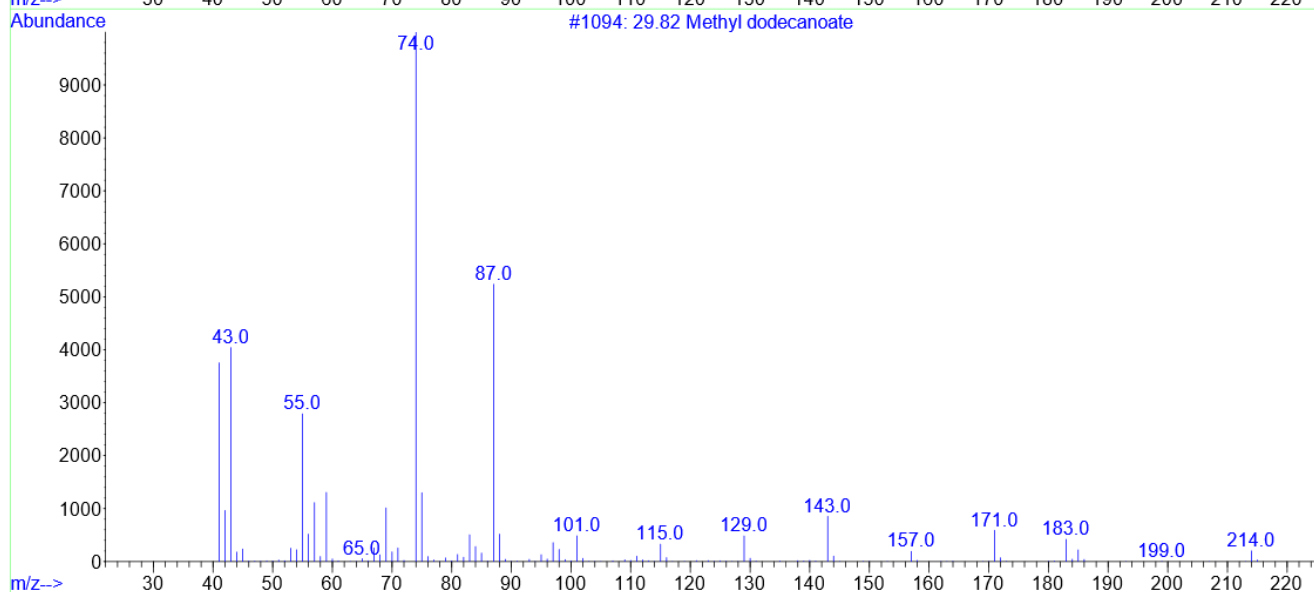



## 63. Diethyl phthalate

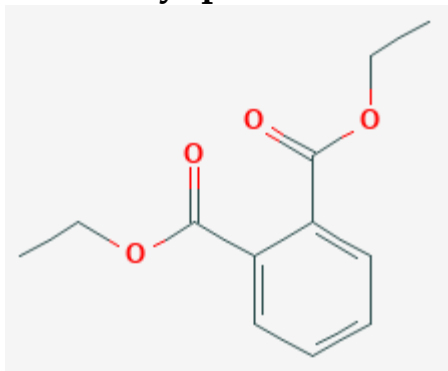

Library Searched : C:\Database\NIST11.L

Quality : 90

ID : Diethyl Phthalate

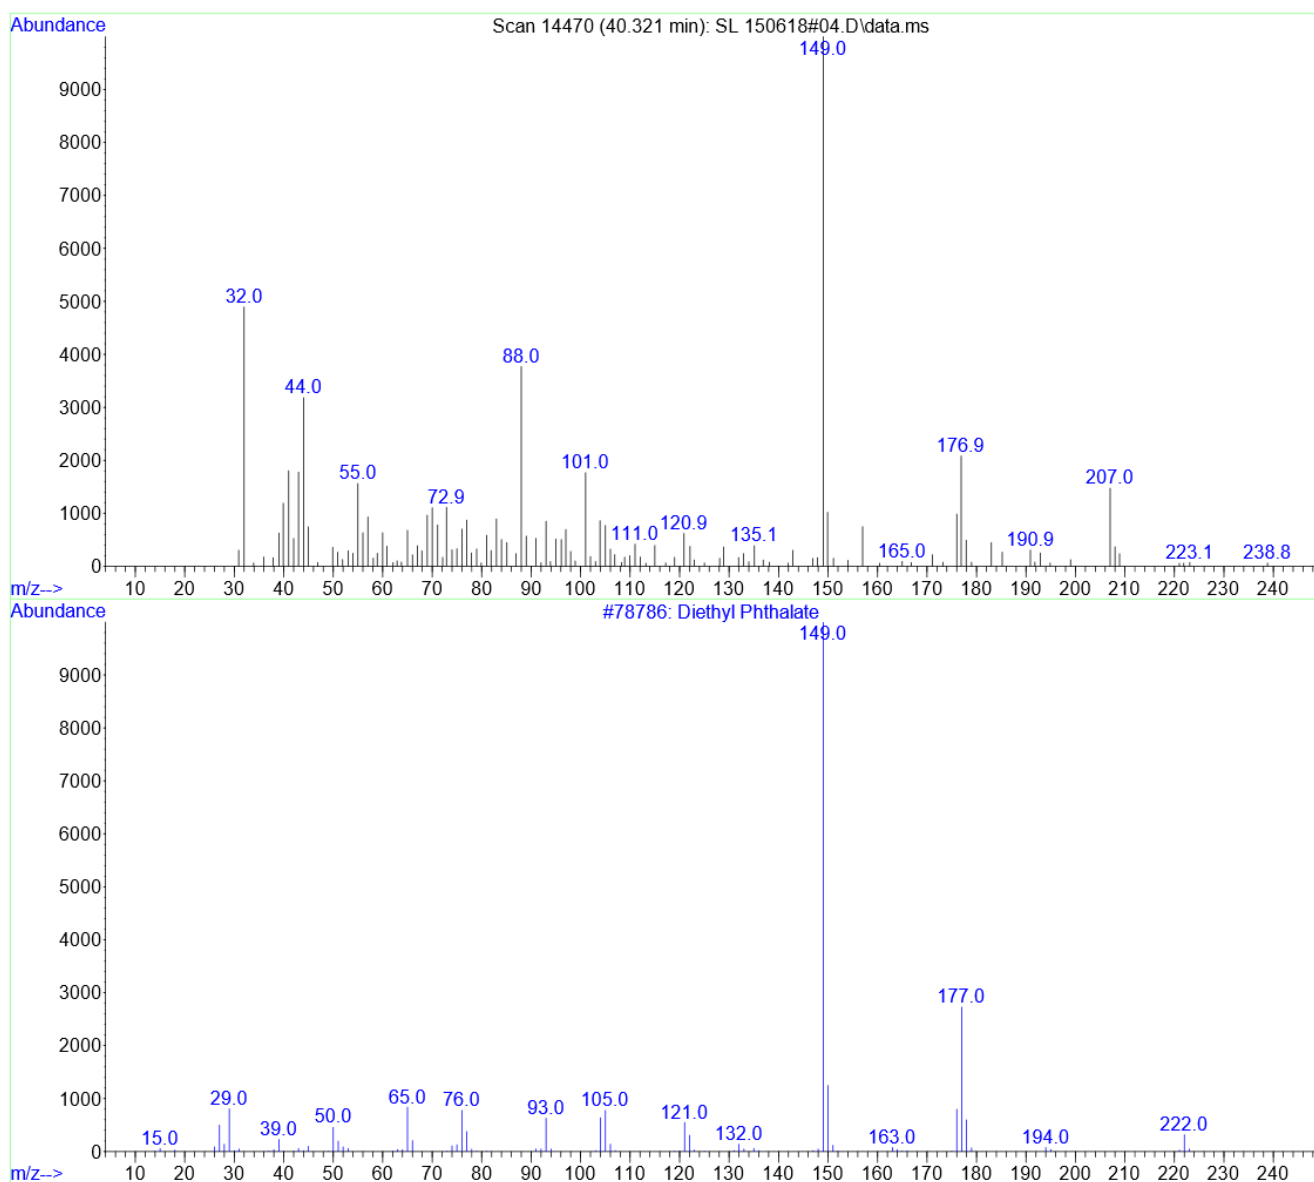

## 64. Ethyl laurate

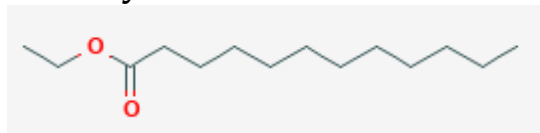

Library Searched : C:\Database\NIST11.L  
Quality : 68  
ID : Dodecanoic acid, ethyl ester

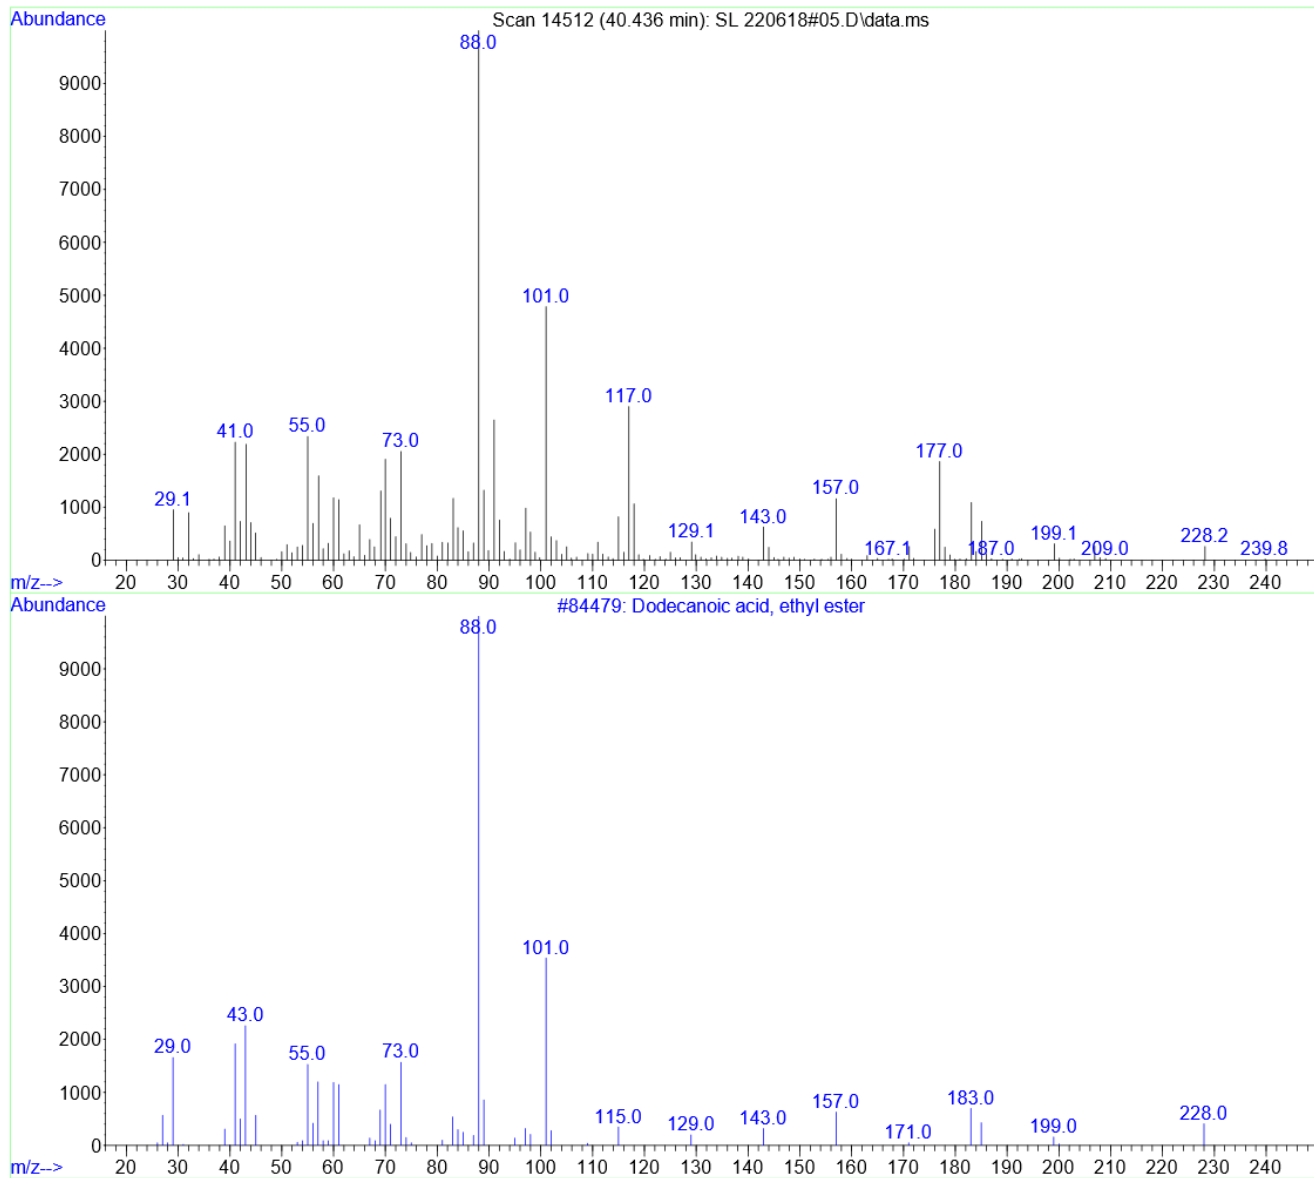

## 65. Ethyl vinyl ketone

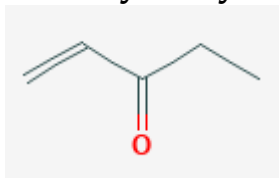

Library Searched : C:\Database\NIST11.L  
Quality : 52  
ID : 1-Penten-3-one

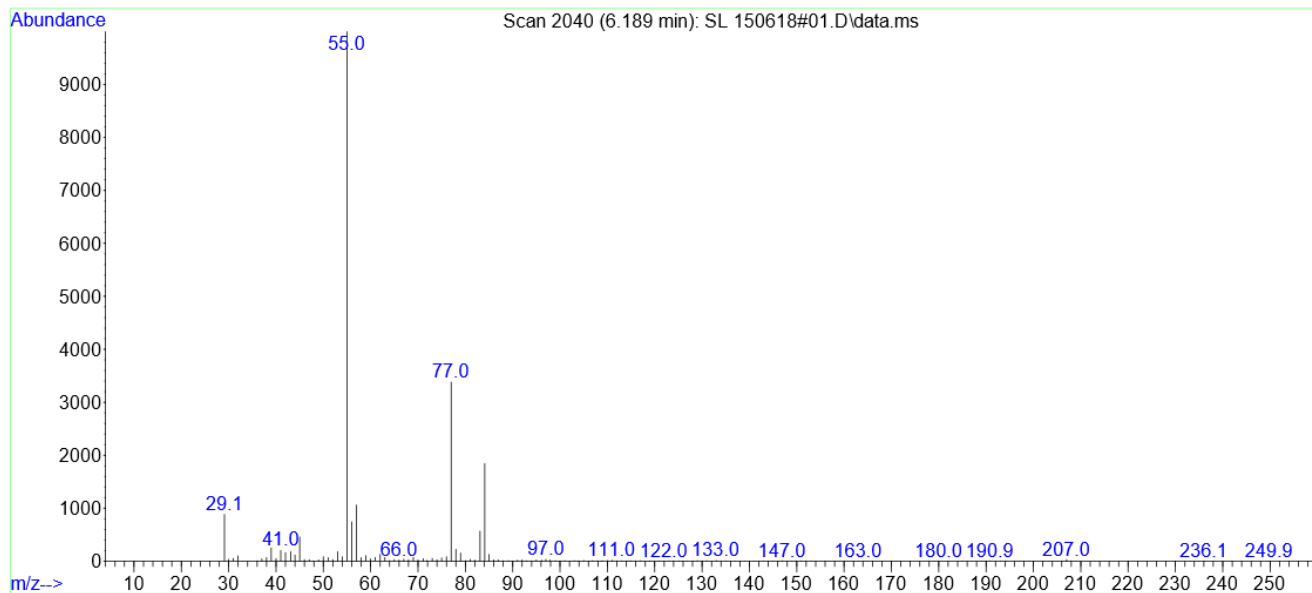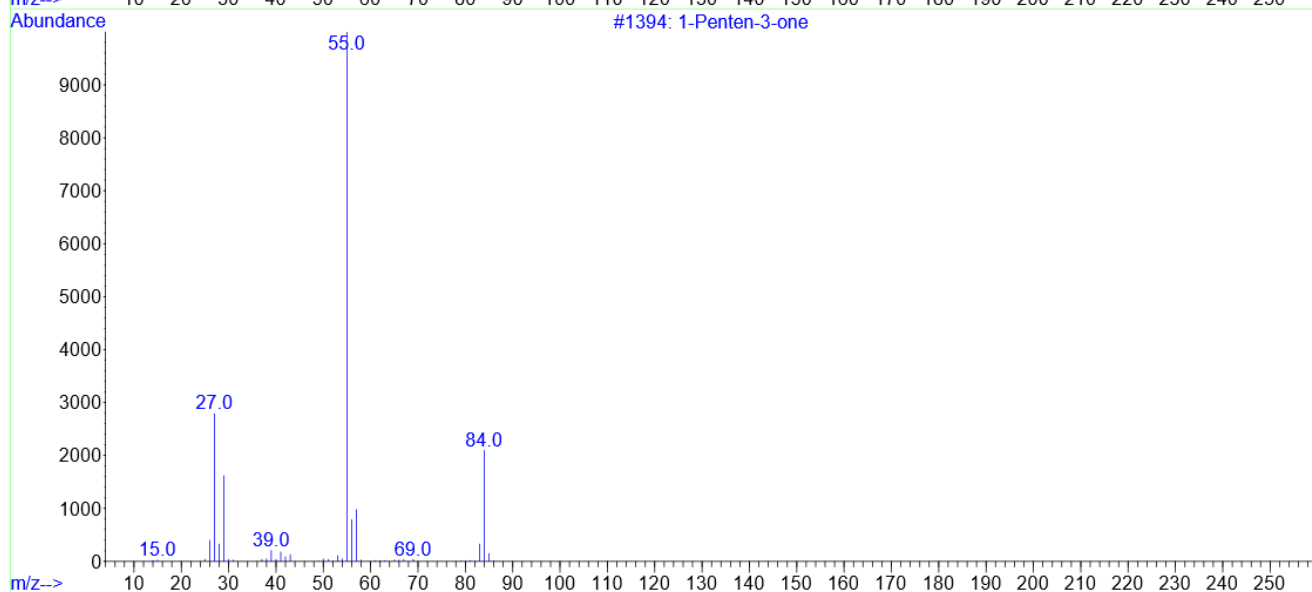

## 66. 3-pentanone

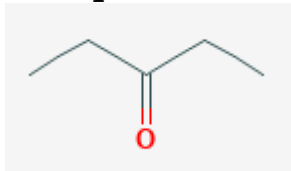

Library Searched : C:\Database\NIST11.L

Quality : 78

ID : 3-Pentanone

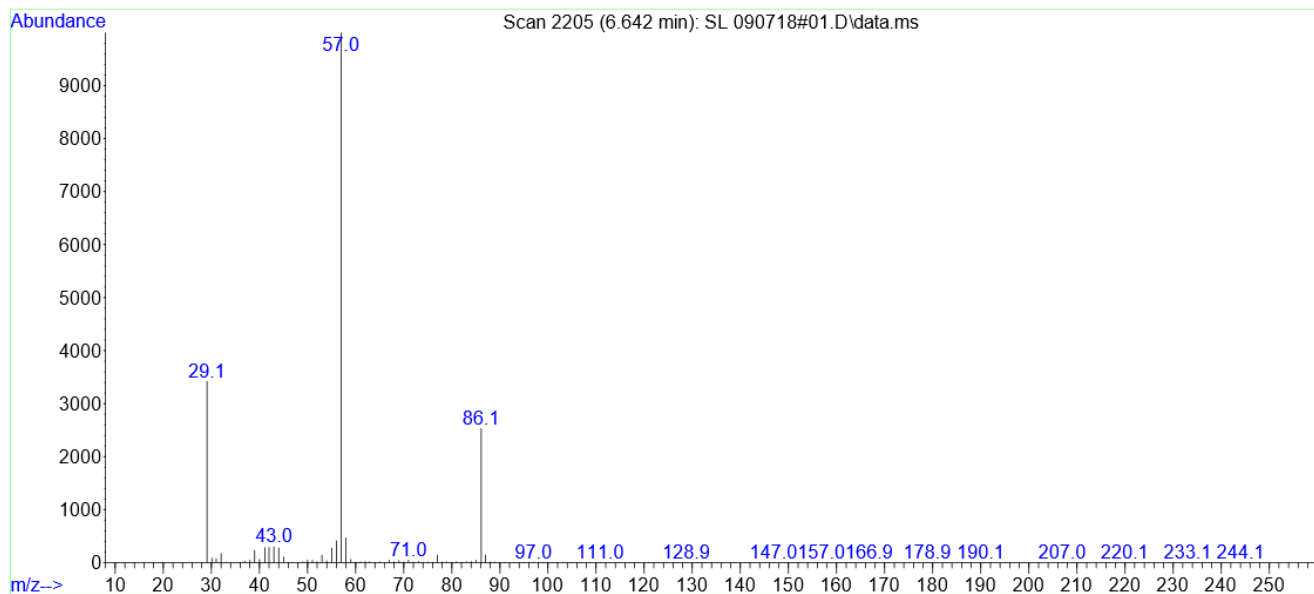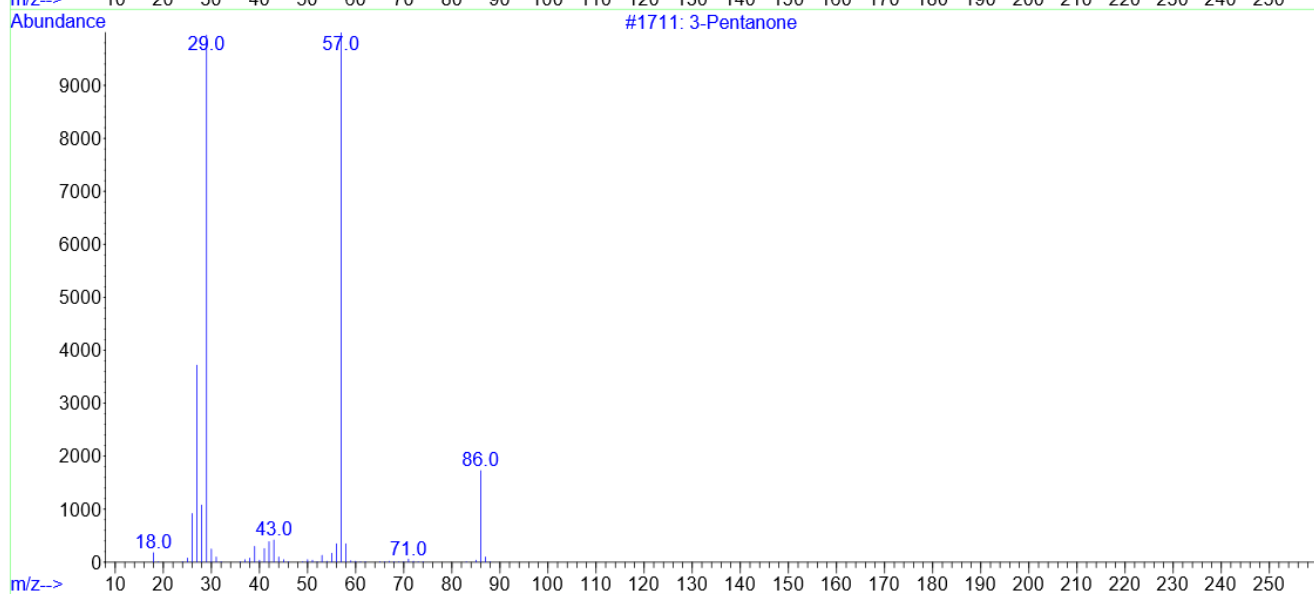

## 67. 2,3-octanedione

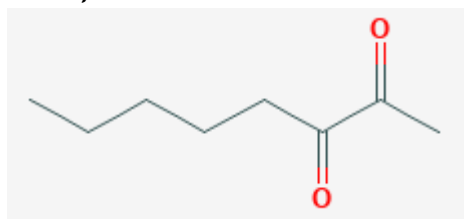

Library Searched : C:\Database\NIST11.L

Quality : 64

ID : 3-Octanone, 2-methyl-

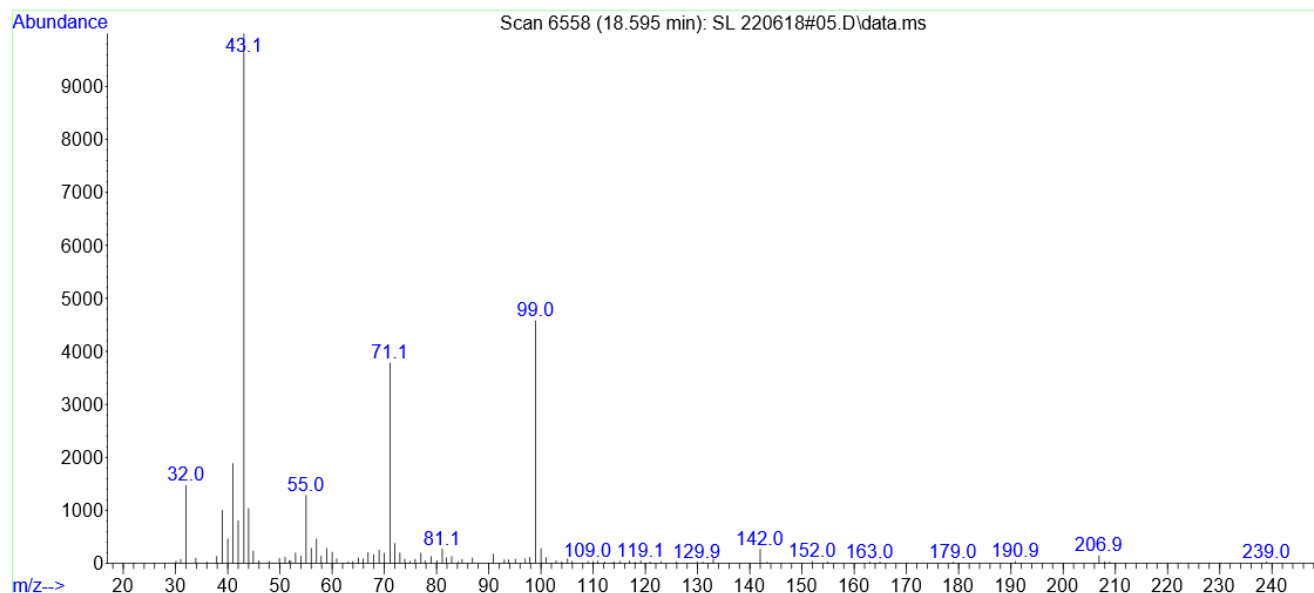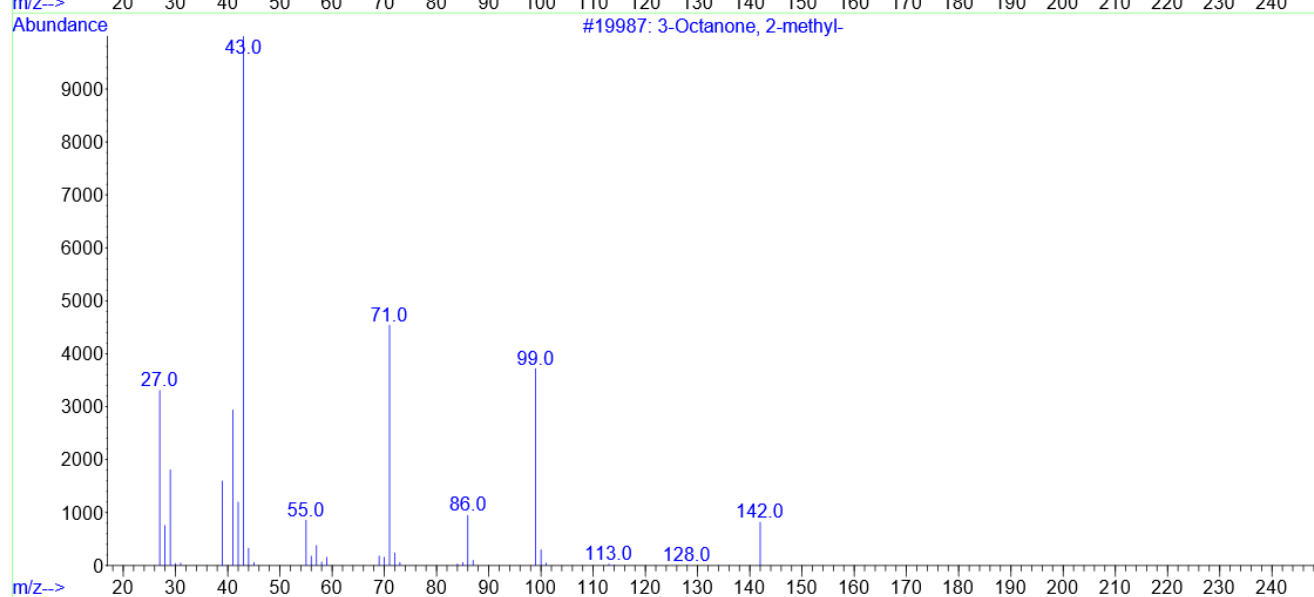

## 68. 6-methyl-5-hepten-2-one

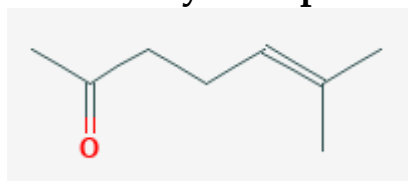

Library Searched : C:\Database\NIST11.L  
Quality : 93  
ID : 5-Hepten-2-one, 6-methyl-

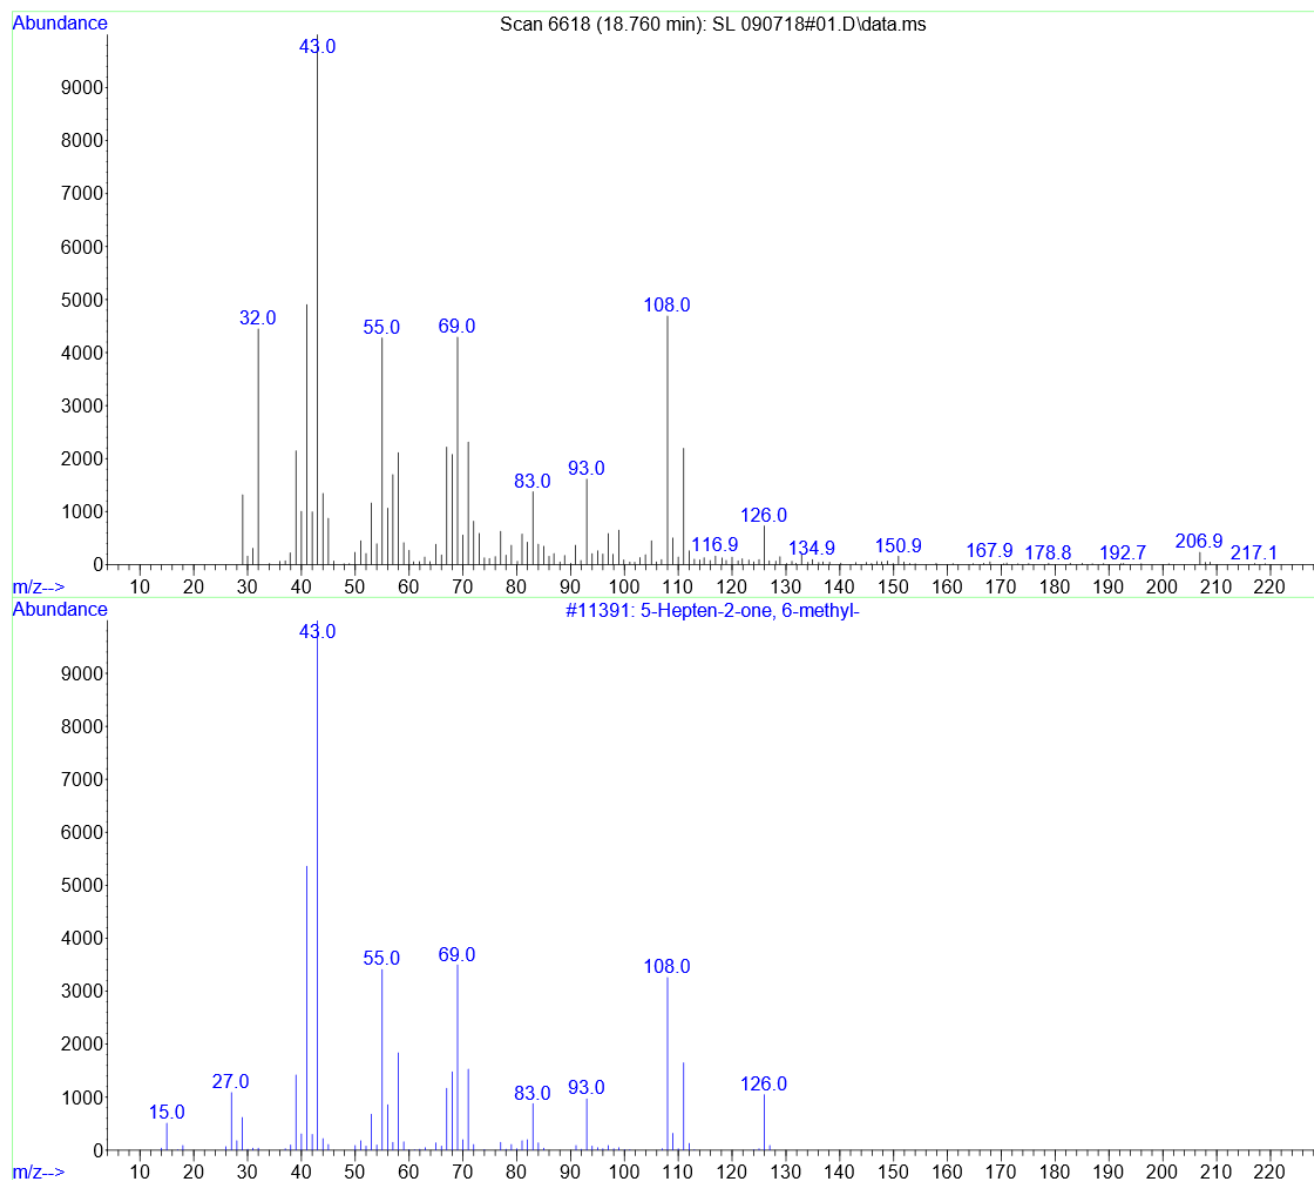

## 69. 2,2,6-trimethylcyclohexanone

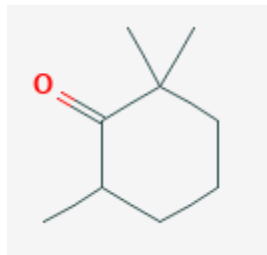

Library Searched : C:\Database\NIST11.L

Quality : 58

ID : Cyclohexanone, 2,2,6-trimethyl-

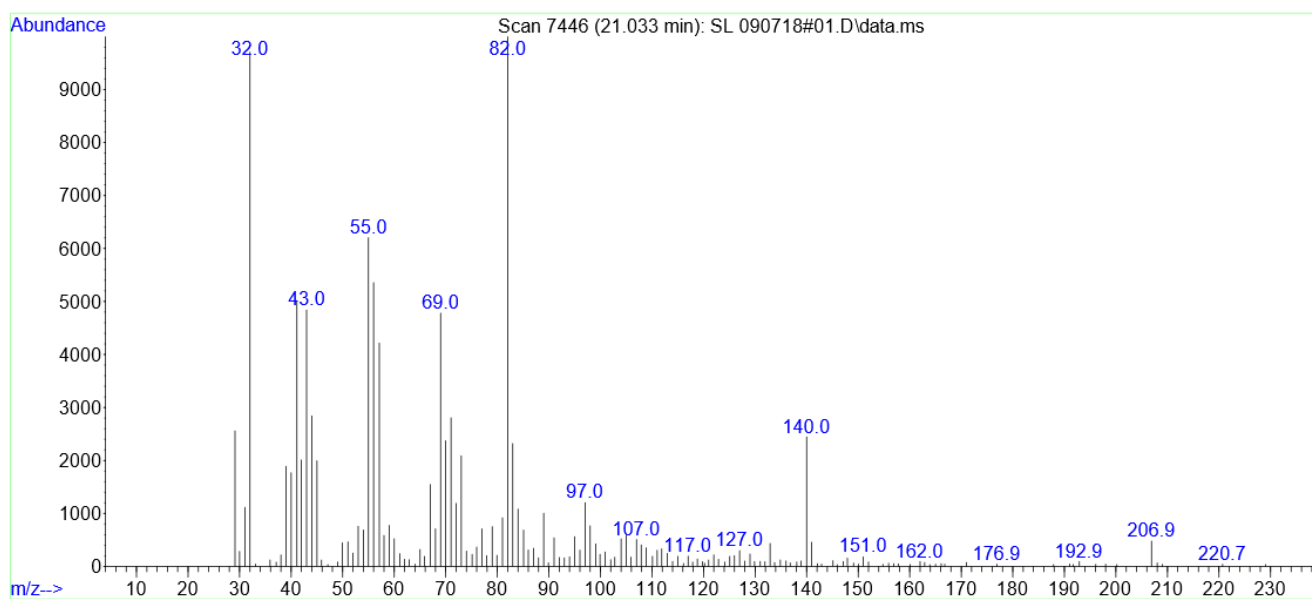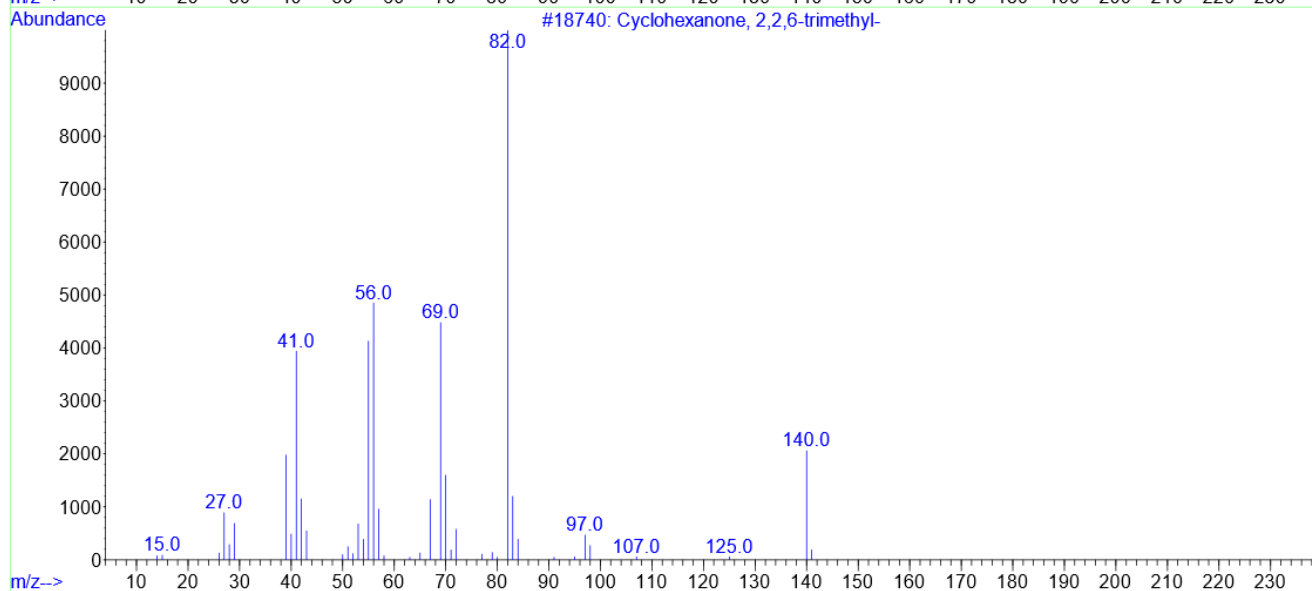

## 70. (E,E)-3,5-octadien-2-one

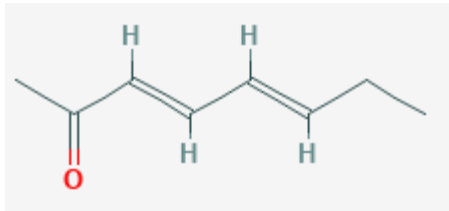

Library Searched : C:\Database\NIST11.L

Quality : 87

ID : 3,5-Octadien-2-one

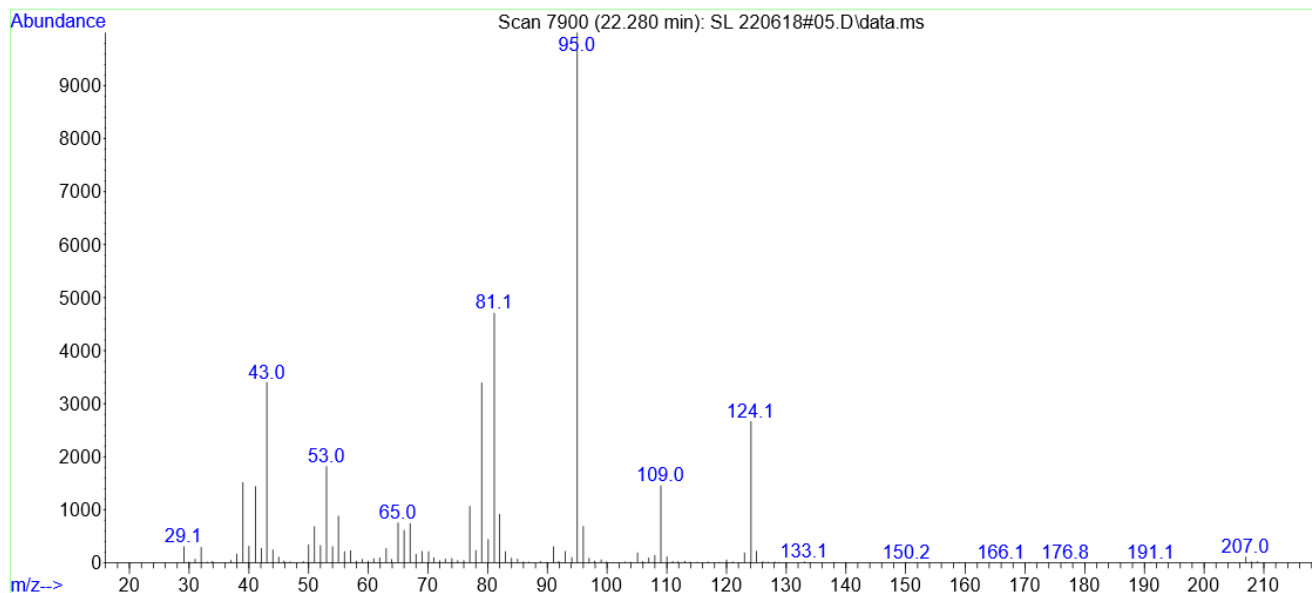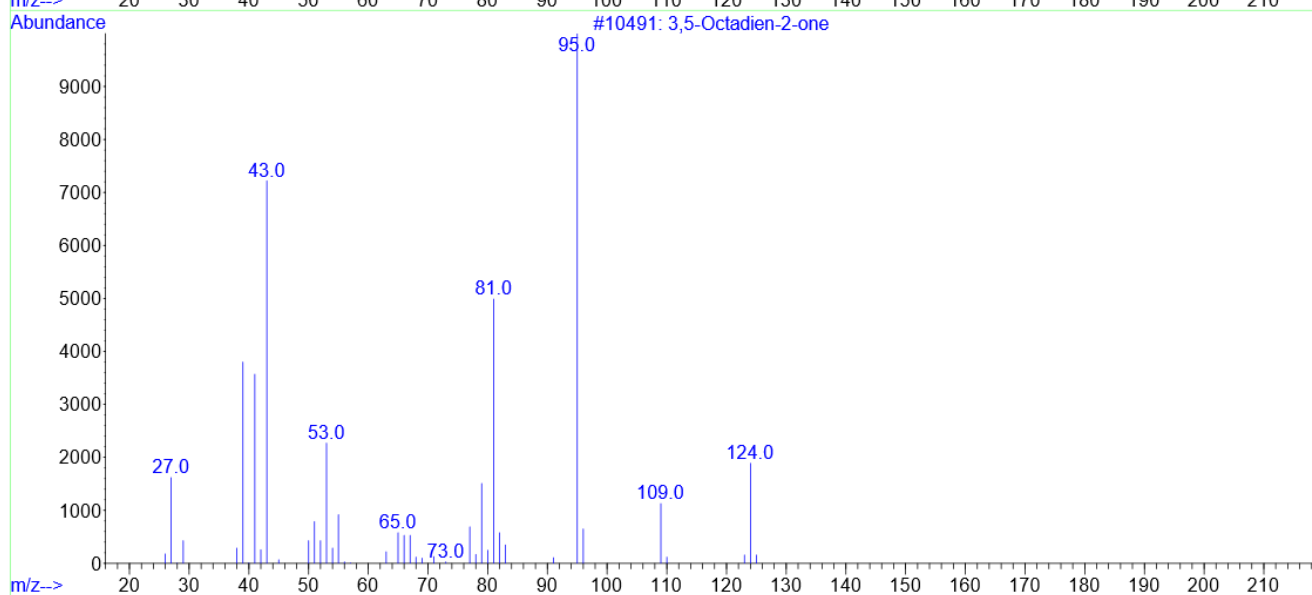



## 71. 3,5-octadien-2-one

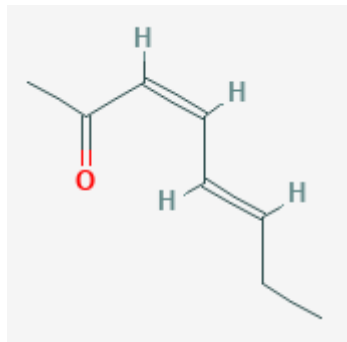

Library Searched : C:\Database\NIST11.L

Quality : 90

ID : 3,5-Octadien-2-one

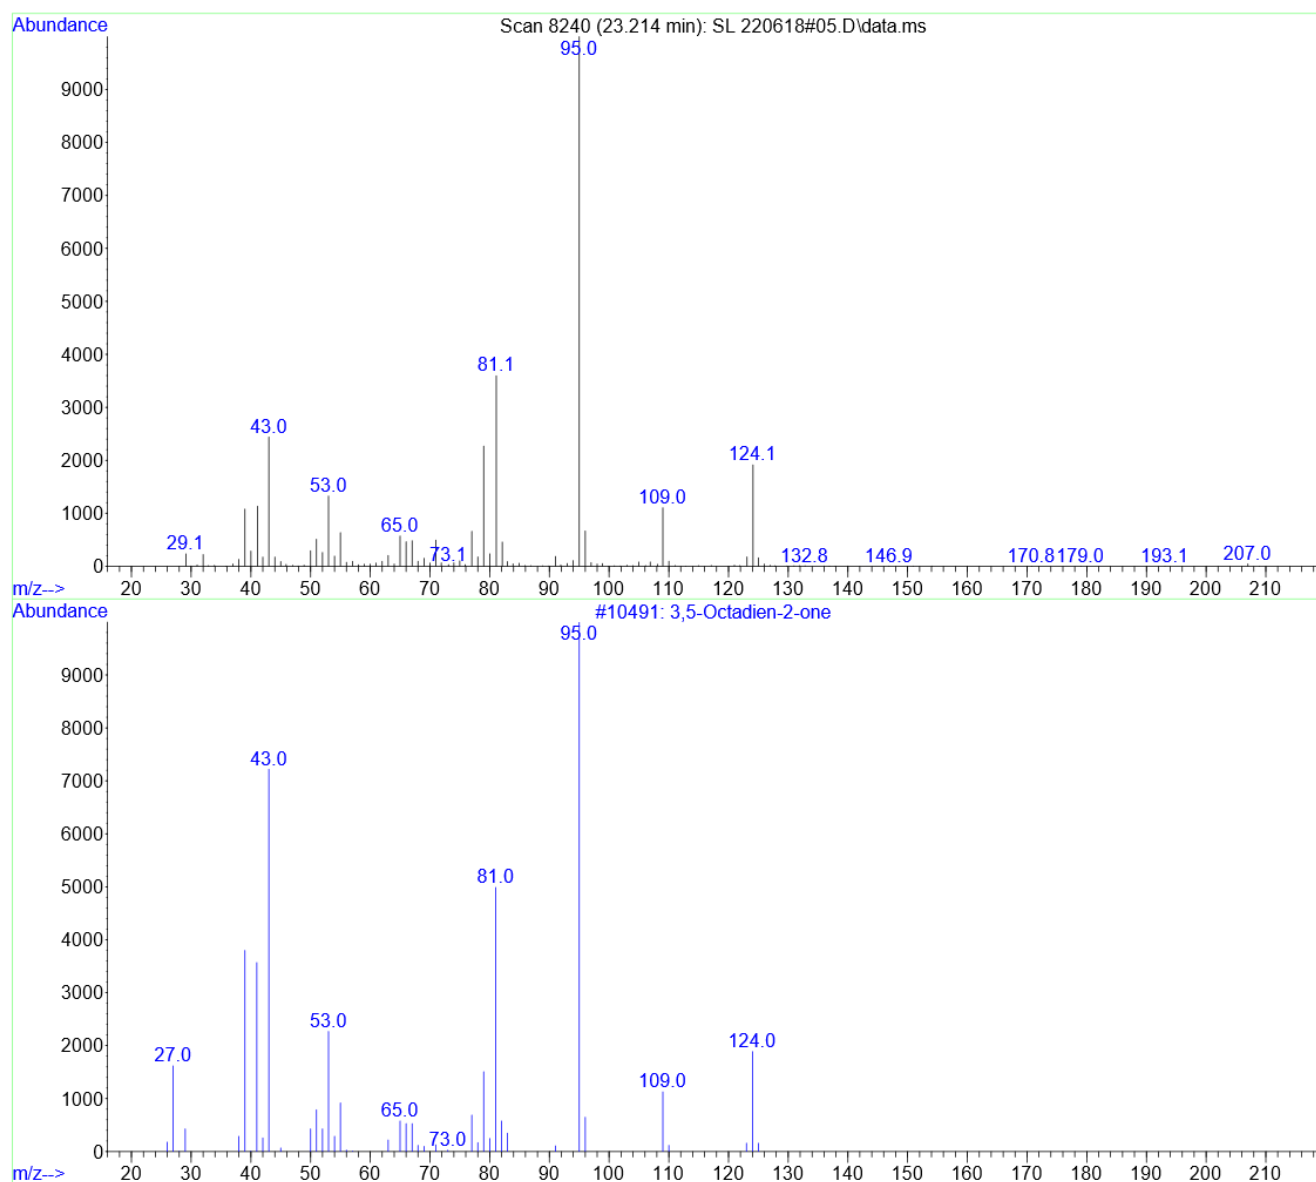

## 72. Dihydro-2H-thiopyran-3(4H)-one

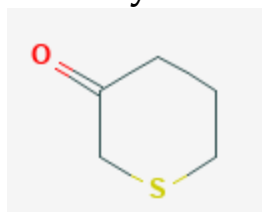

Library Searched : C:\Database\NIST11.L

Quality : 53

ID : 2H-Thiopyran-3(4H)-one, dihydro-

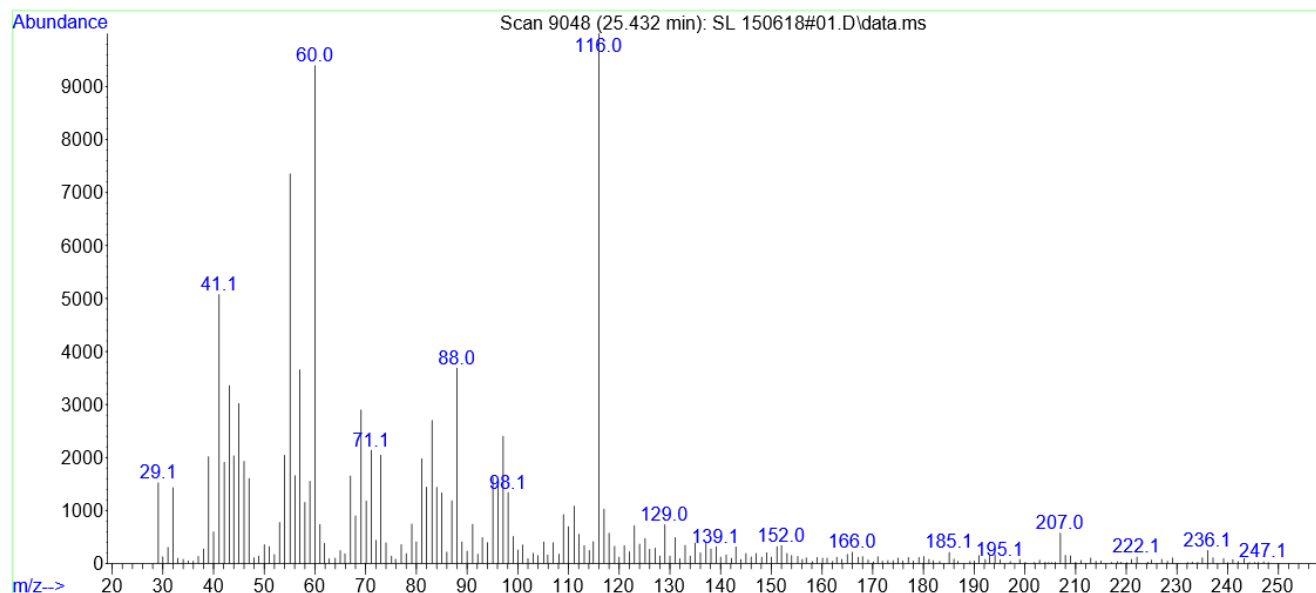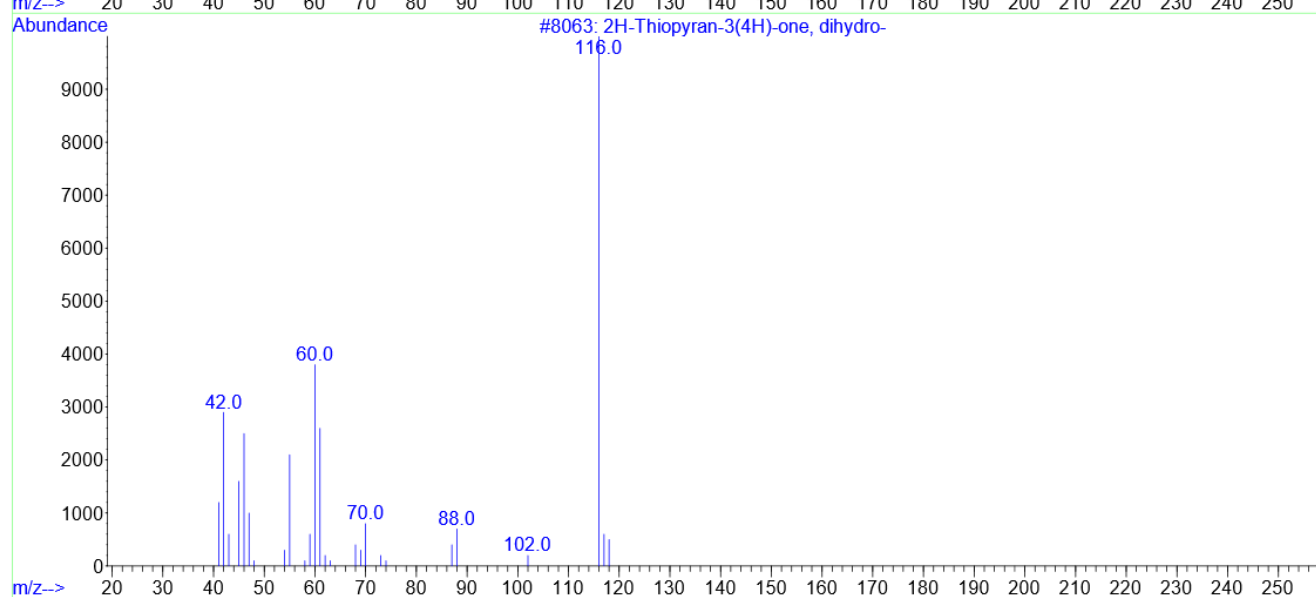

## 73. Geranylacetone

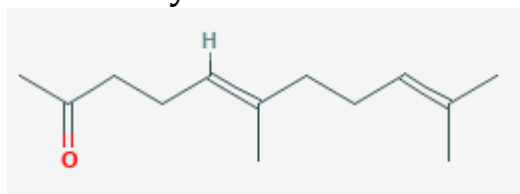

Library Searched : C:\Database\Adams.L

Quality : 78

ID : 26.85 Geranyl acetone

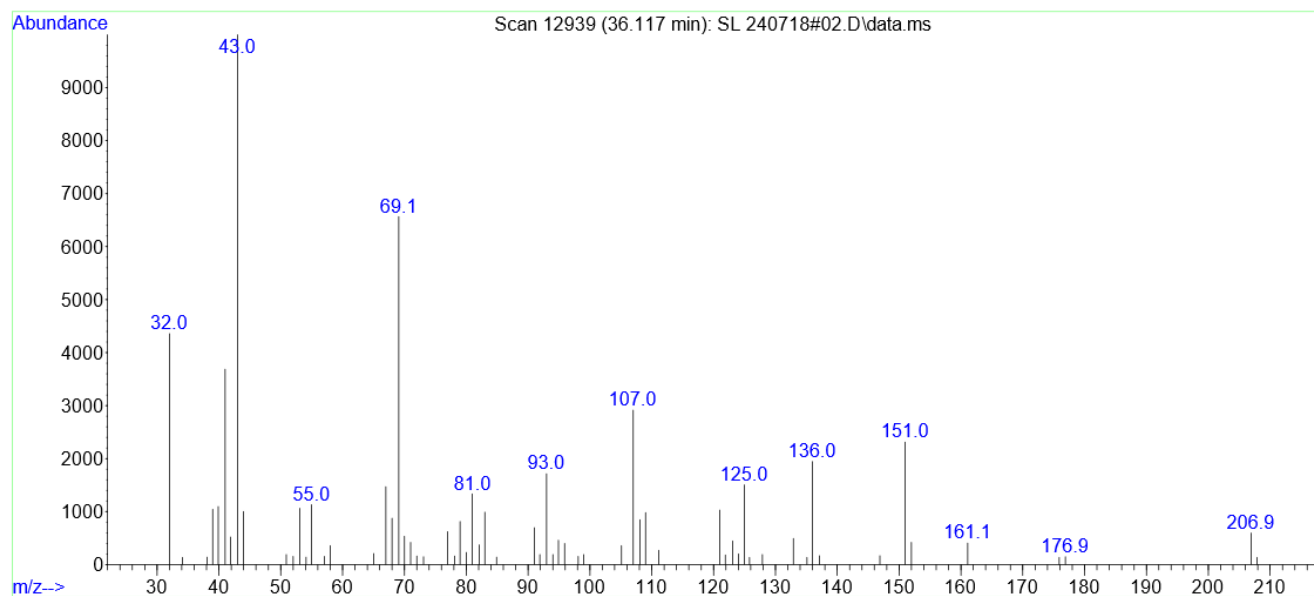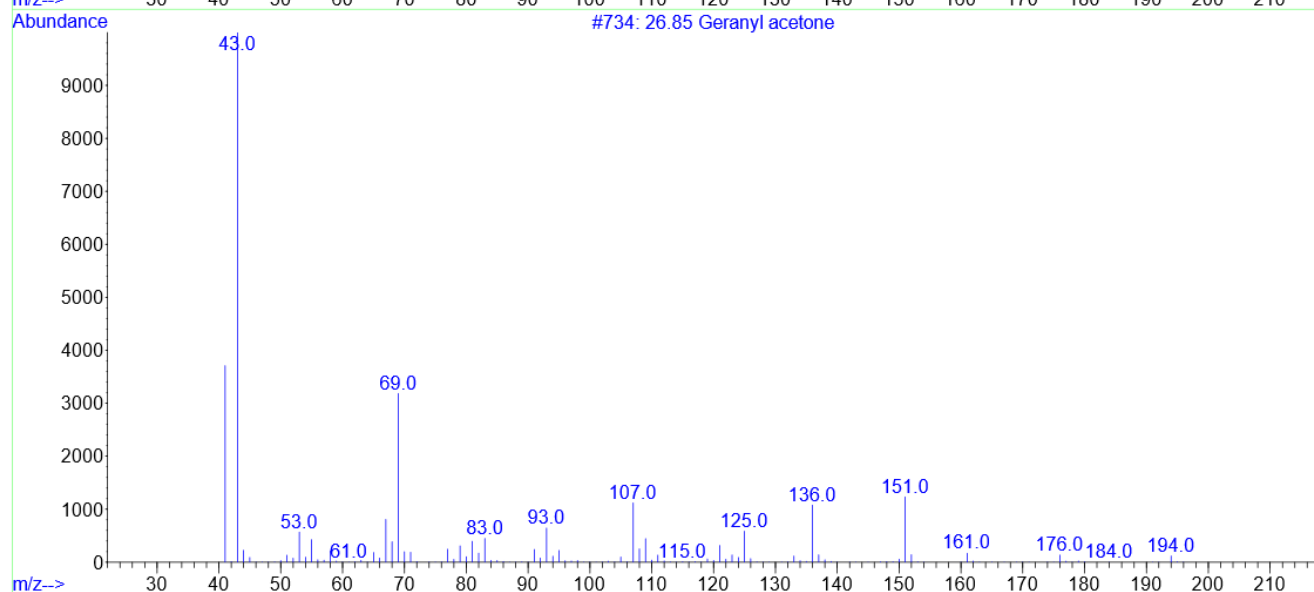

## 74. 3-butenenitrile

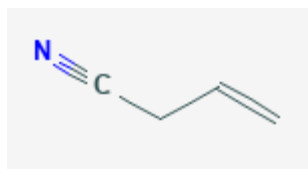

Library Searched : C:\Database\NIST11.L

Quality : 94

ID : 3-Butenenitrile

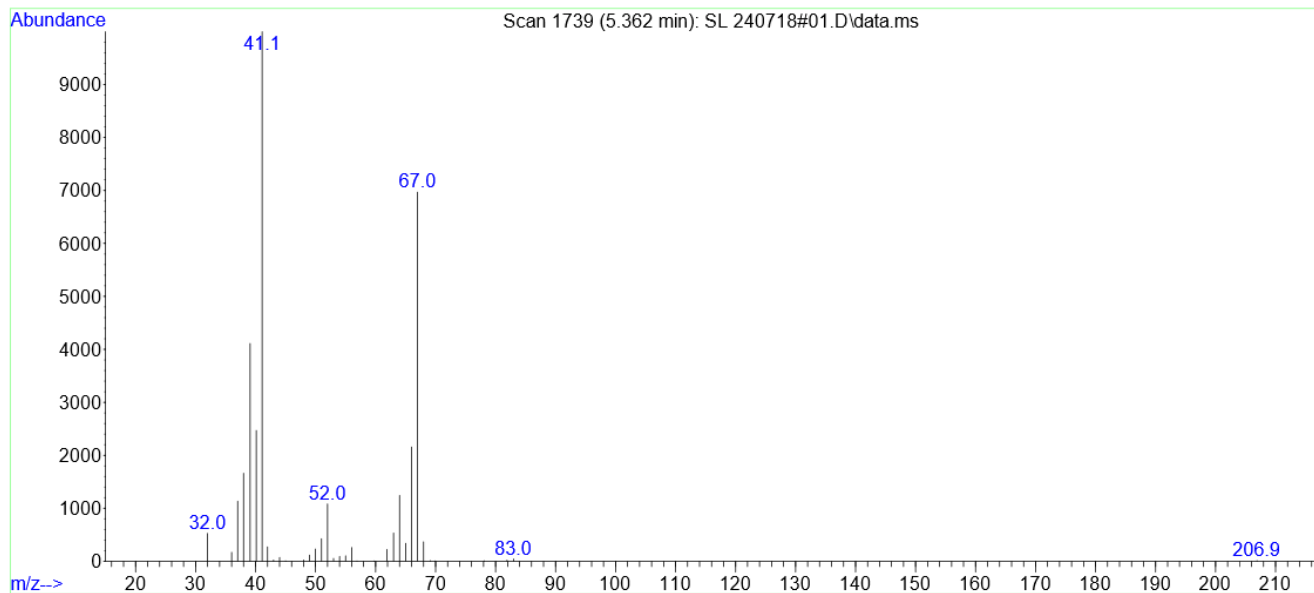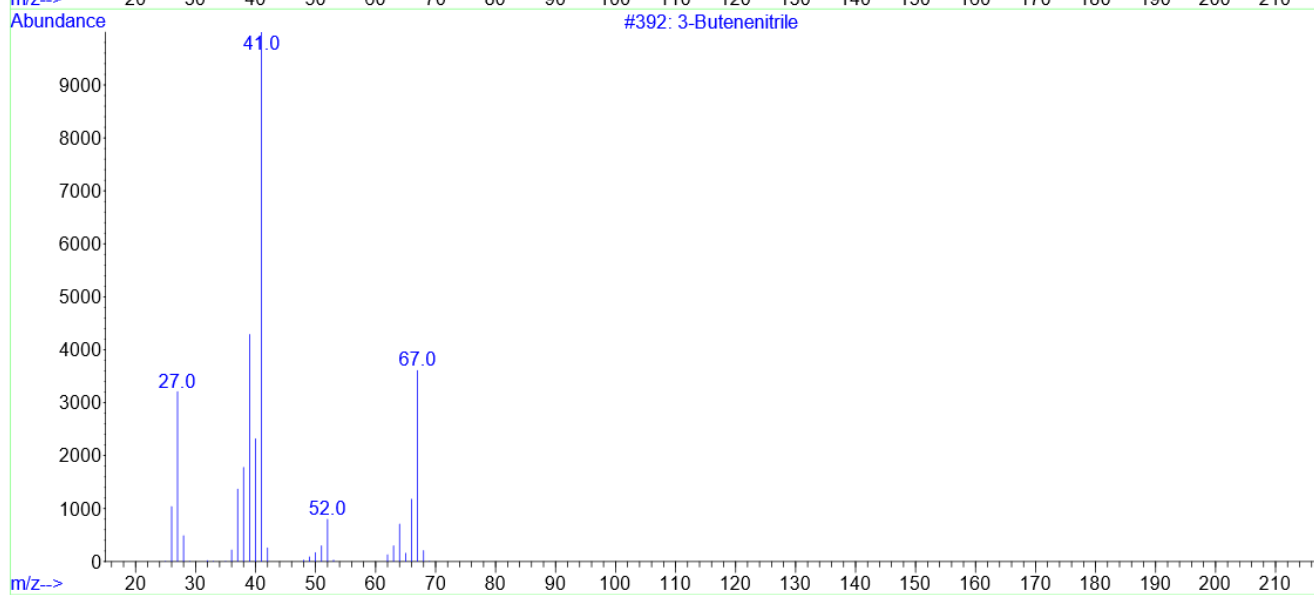

## 75. 5-methylhexanenitrile

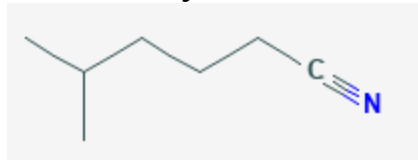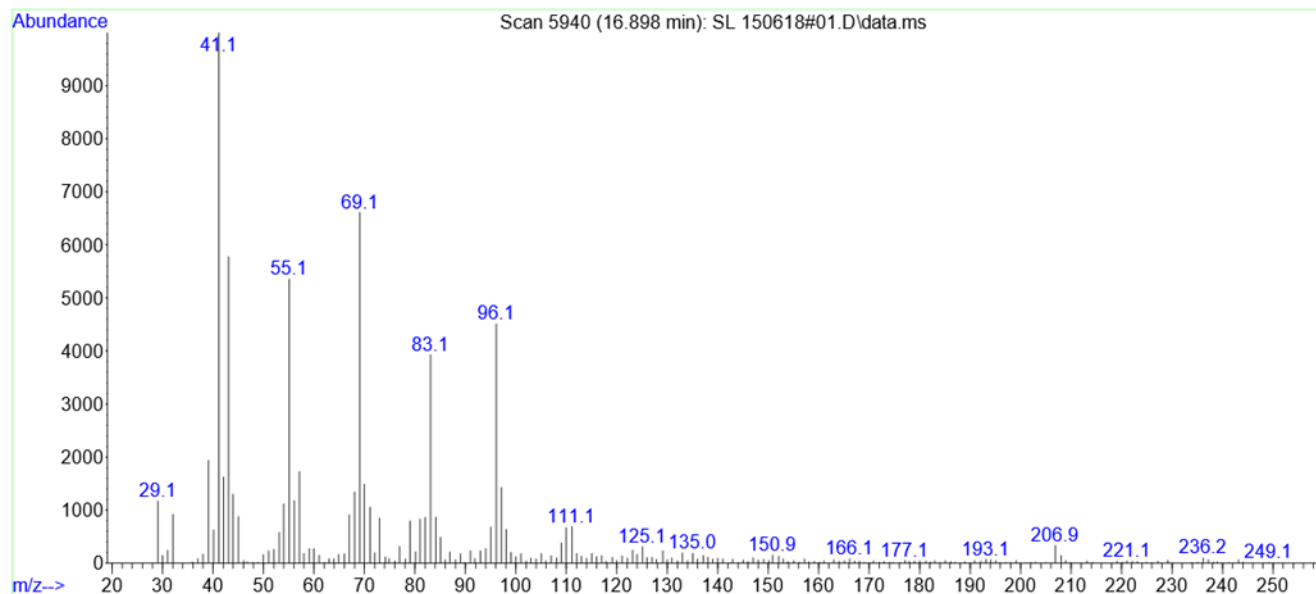

## 76. 6-heptenenitrile

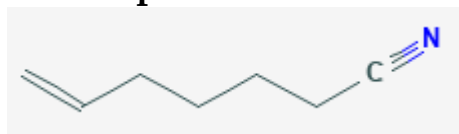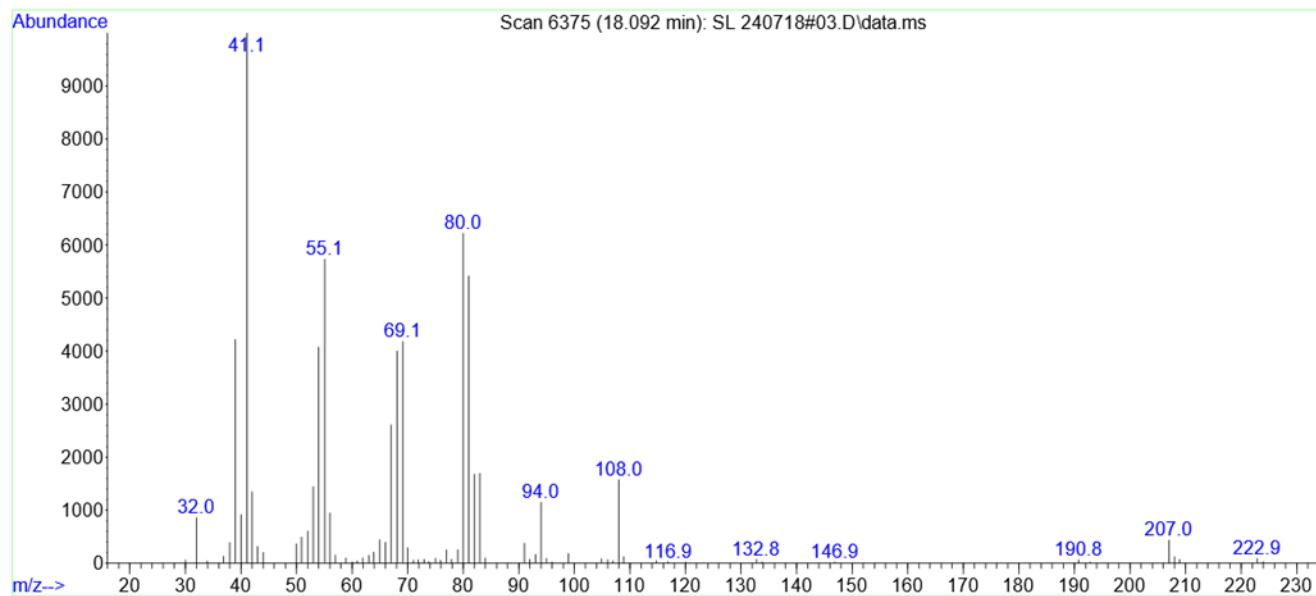

## 77. Thiiraneacetonitrile

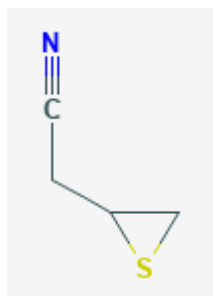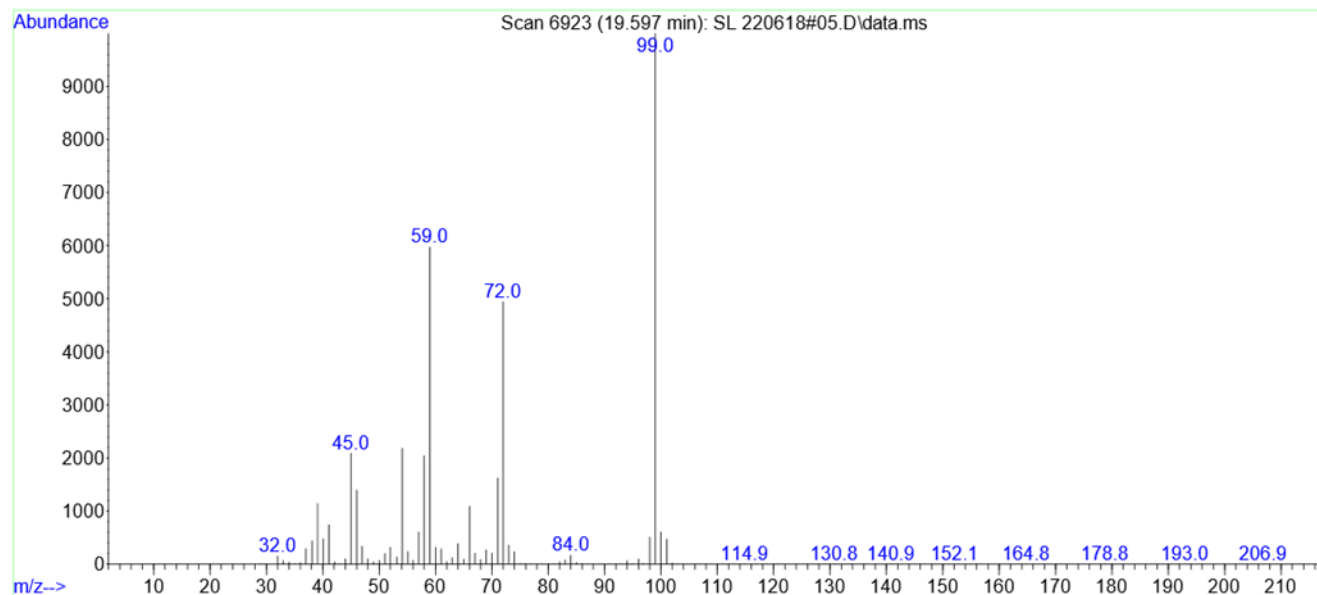

## 78. Phenylacetoneitrile

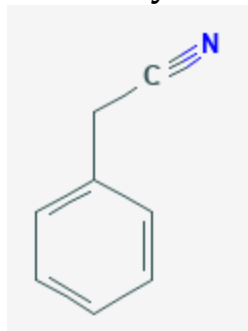

Library Searched : C:\Database\NIST11.L

Quality : 95

ID : Benzyl nitrile

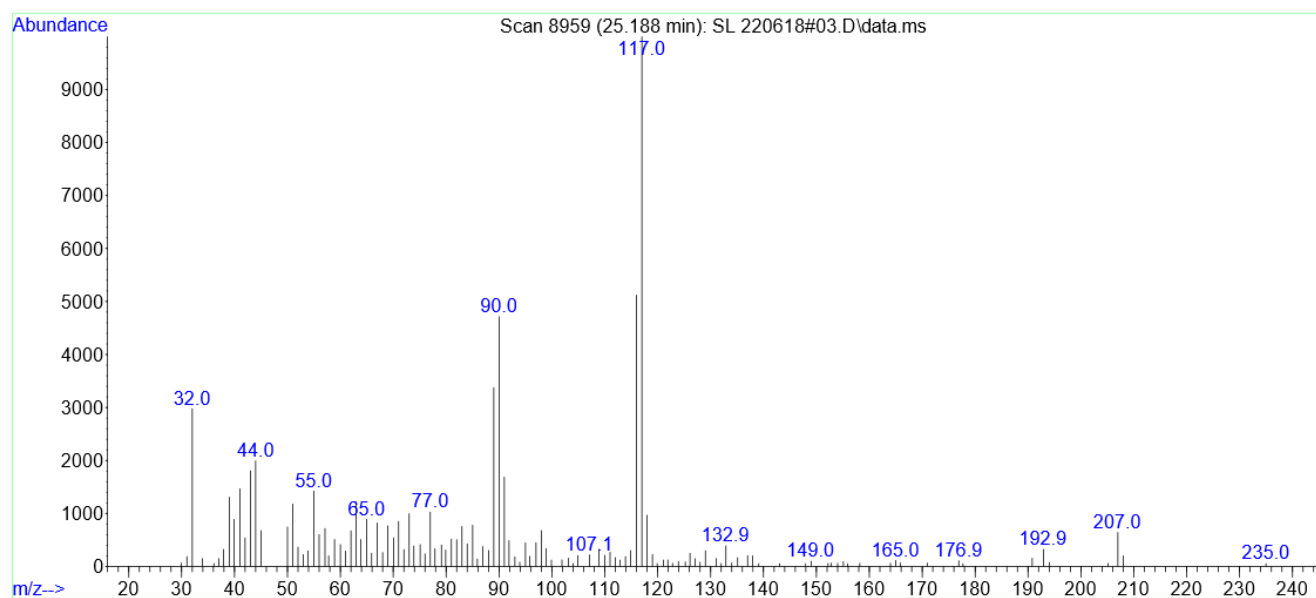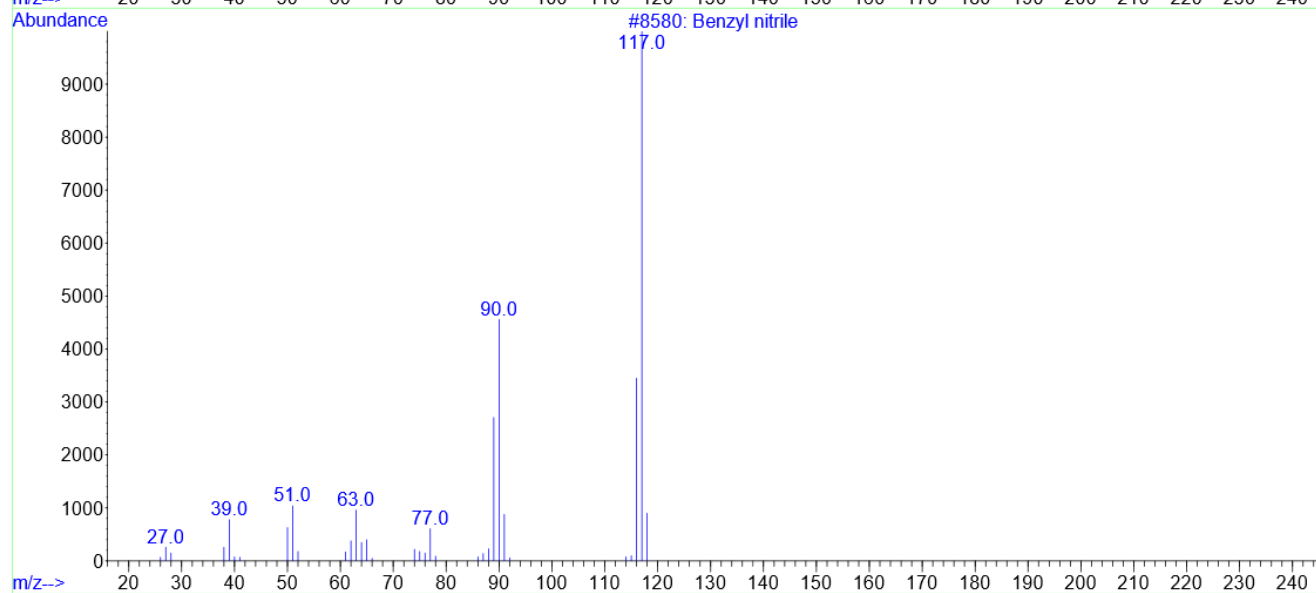

## 79. 5-(methylsulfanyl)pentanenitrile

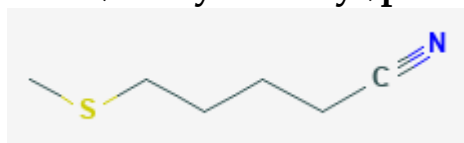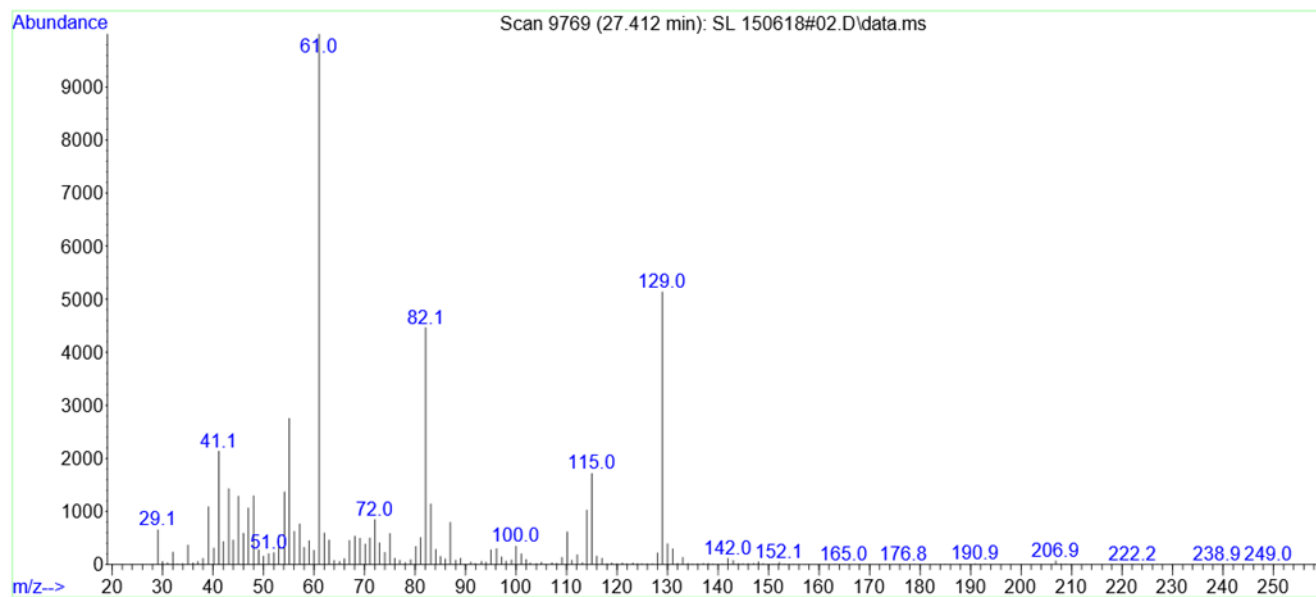

## 80. 4-(methylthio)butanenitrile

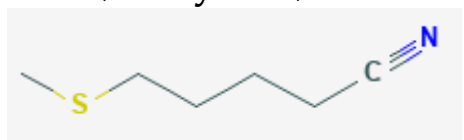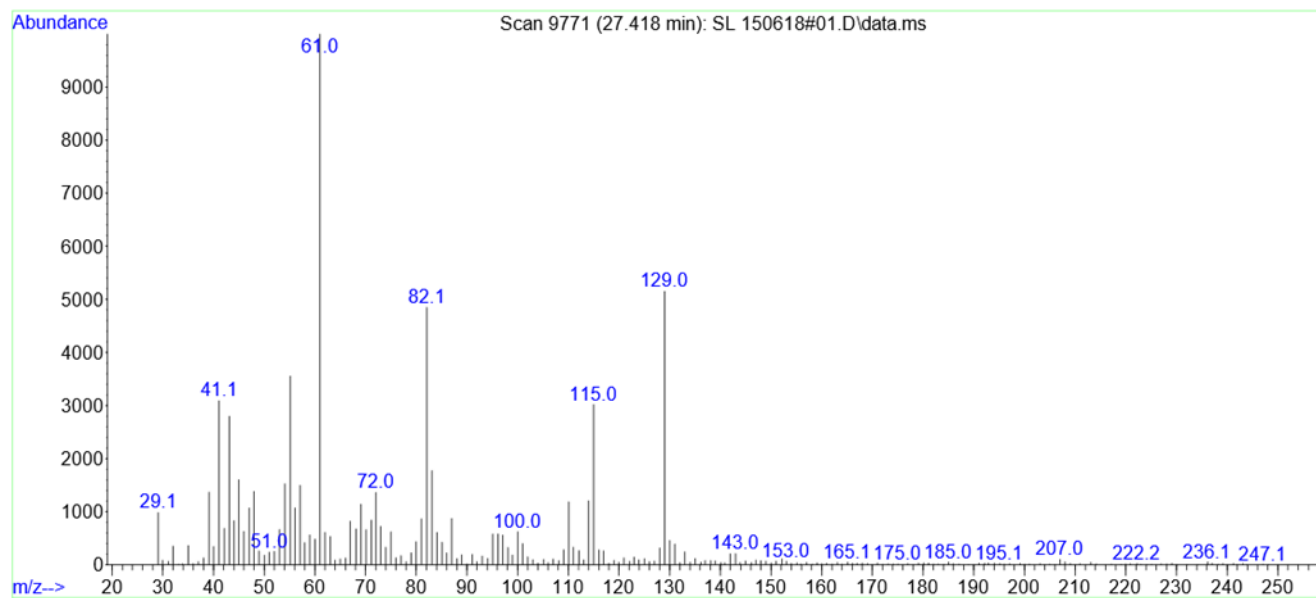



## 81. Benzenepropanenitrile

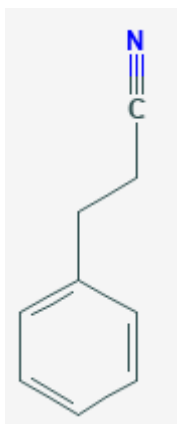

Library Searched : C:\Database\NIST11.L

Quality : 91

ID : Benzenepropanenitrile

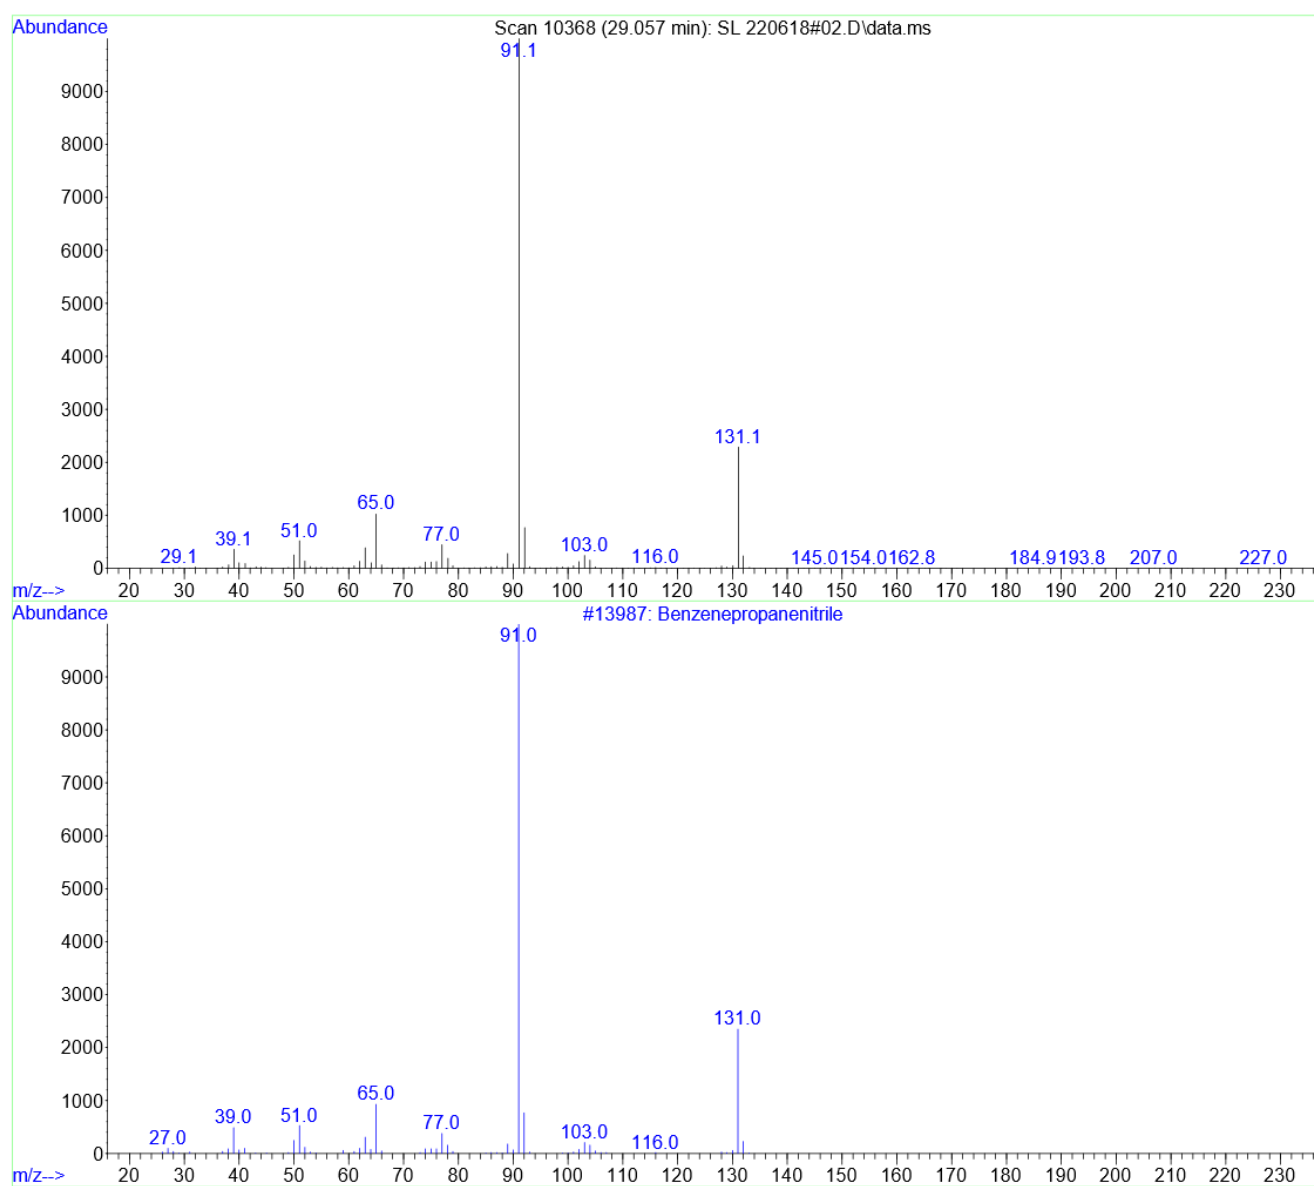

## 82. unidentified nitrile

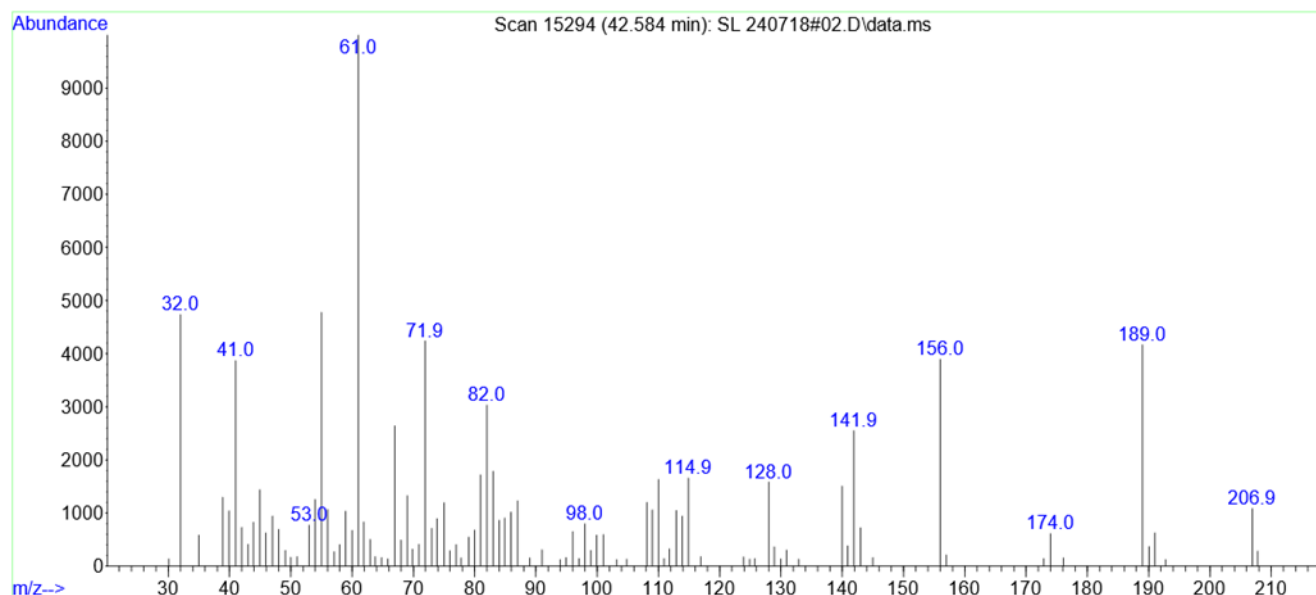

### 83. 2,2,4,6,6-pentamethylheptane

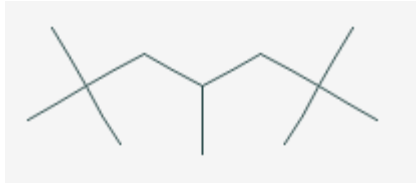

Library Searched : C:\Database\NIST11.L

Quality : 72

ID : Heptane, 2,2,4,6,6-pentamethyl-

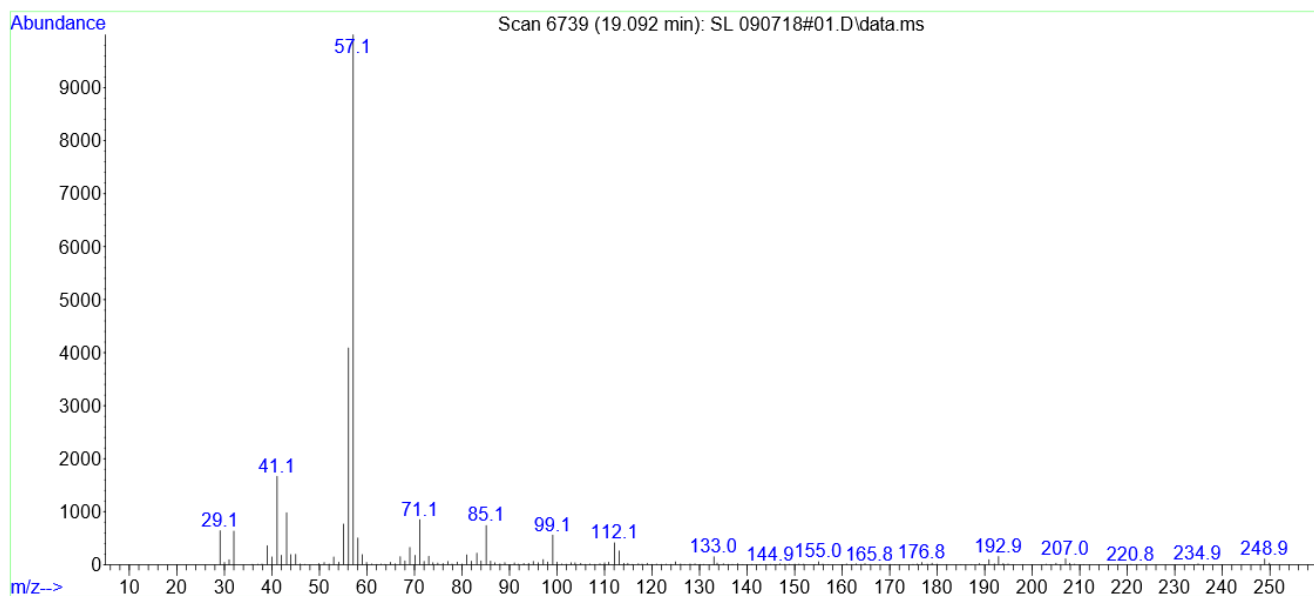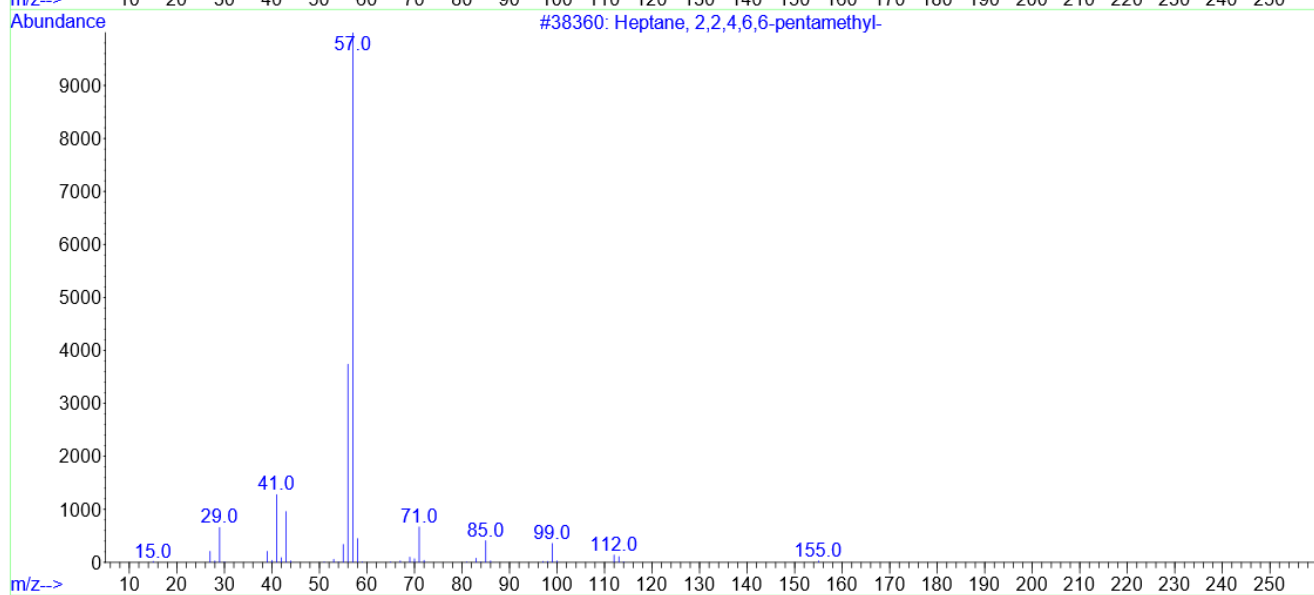

## 84. Undecane

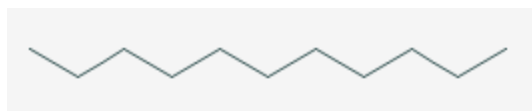

Library Searched : C:\Database\NIST11.L  
Quality : 94  
ID : Undecane

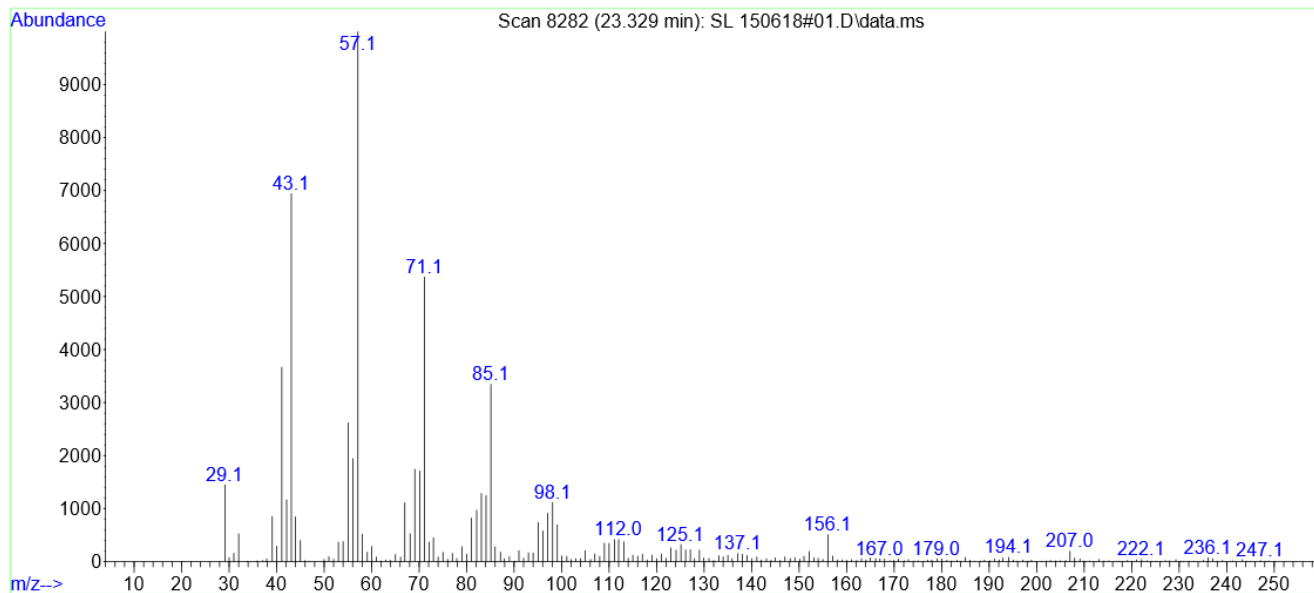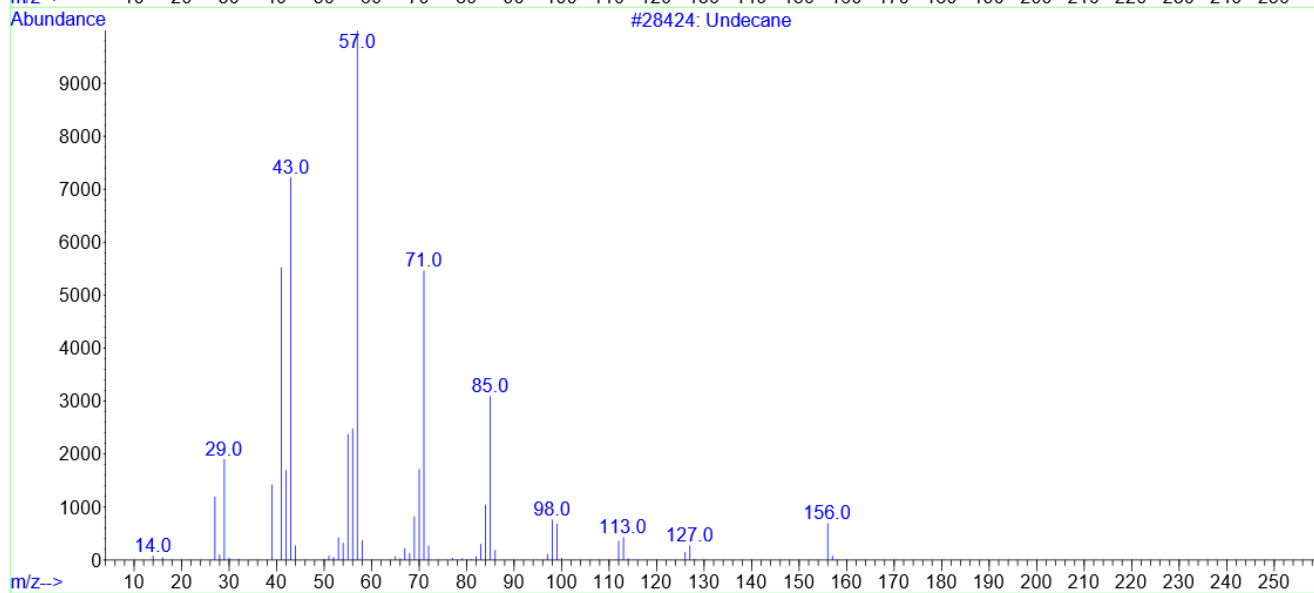

## 85. 1-dodecene

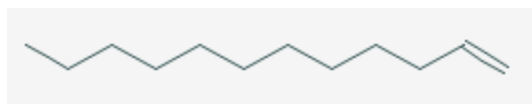

Library Searched : C:\Database\NIST11.L

Quality : 95

ID : 1-Dodecene

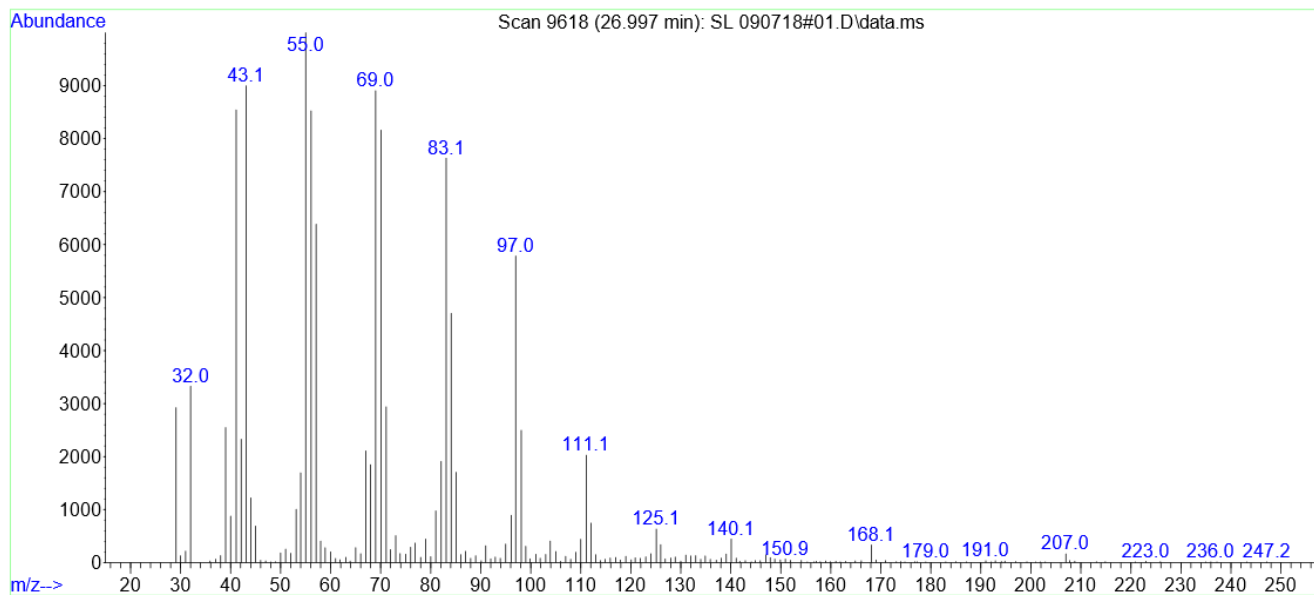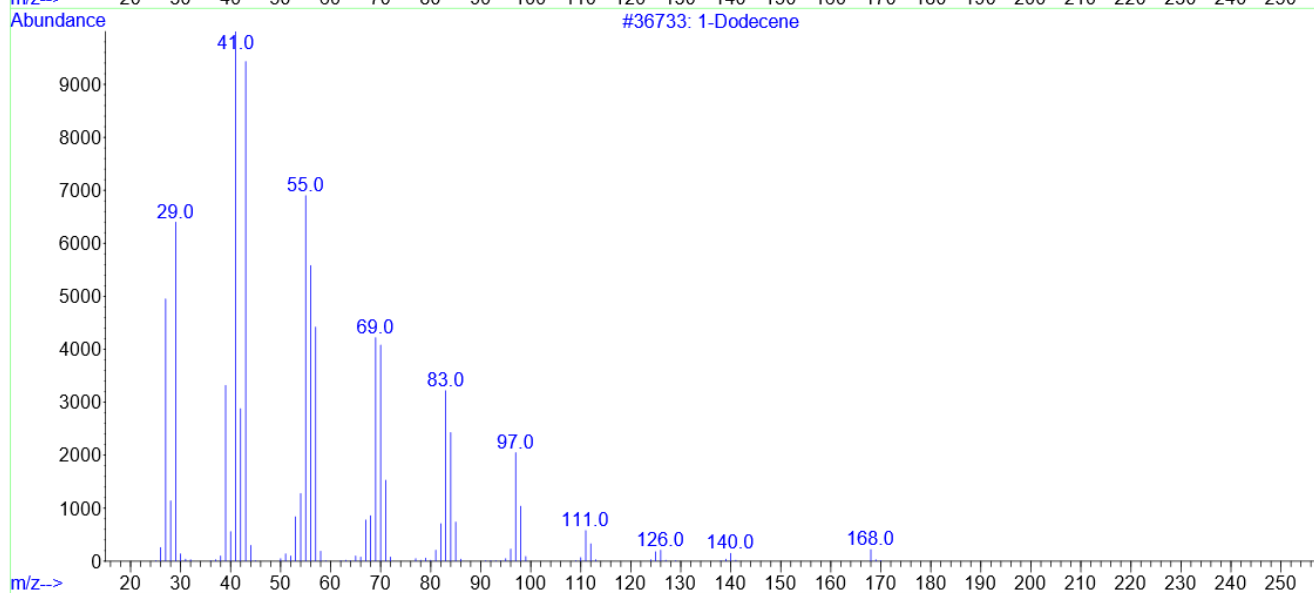

## 86. Dodecane

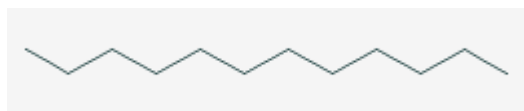

Library Searched : C:\Database\Adams.L  
Quality : 95  
ID : 15.77 Dodecane

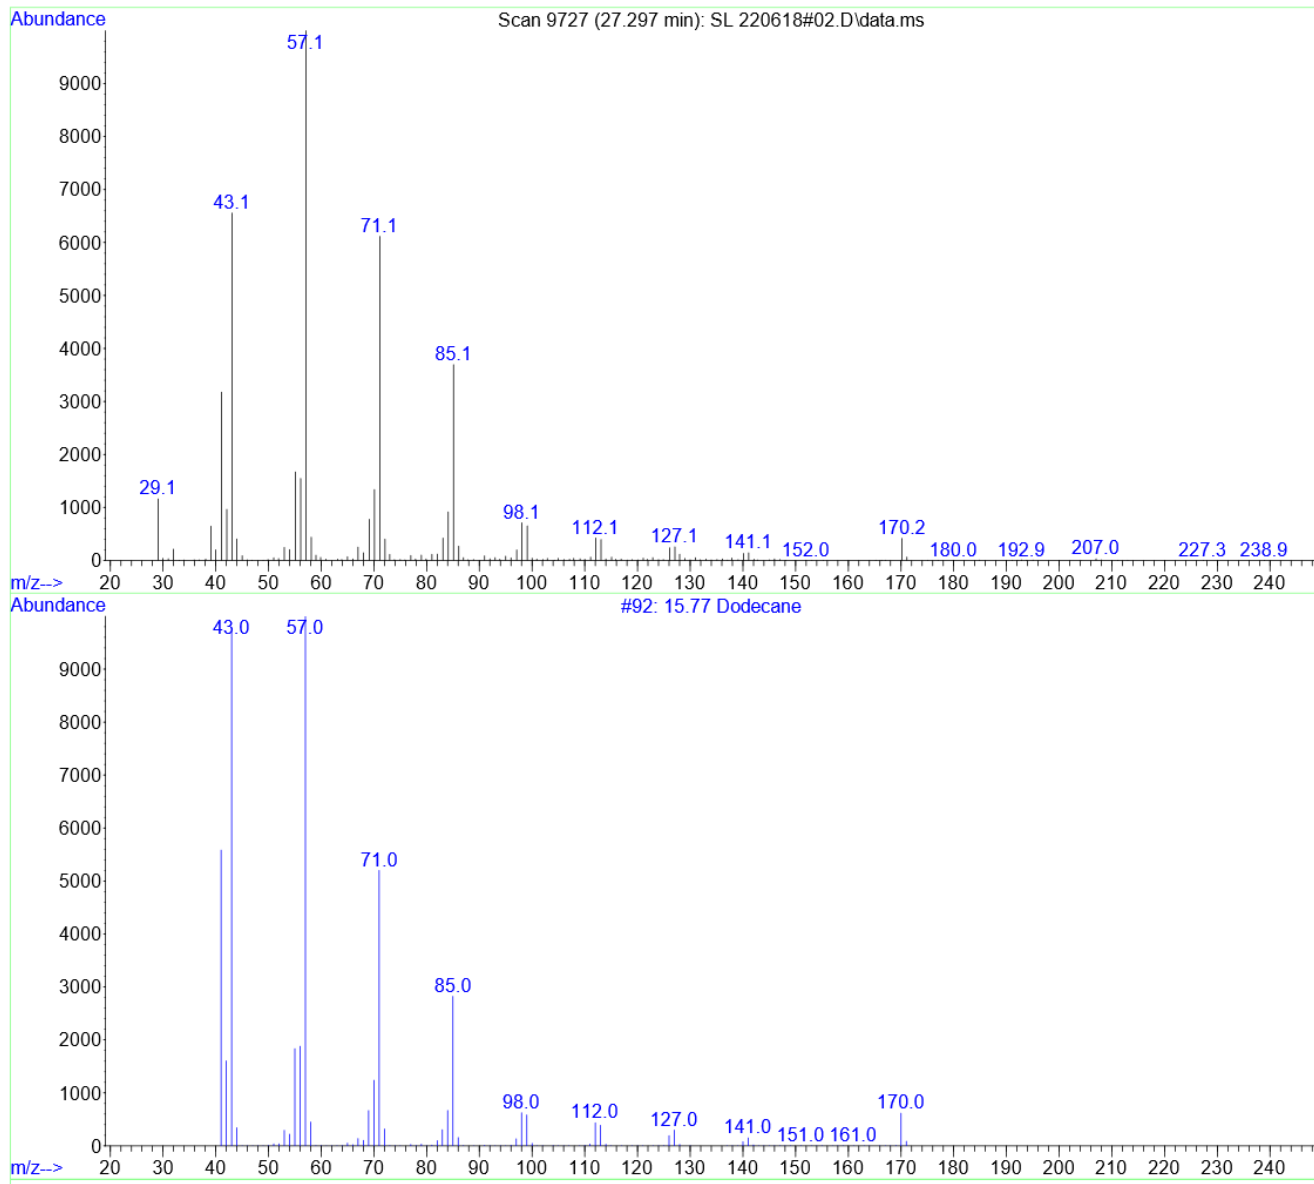

## 87. Tridecane

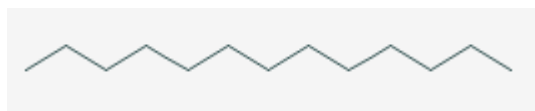

Library Searched : C:\Database\NIST11.L  
Quality : 96  
ID : Tridecane

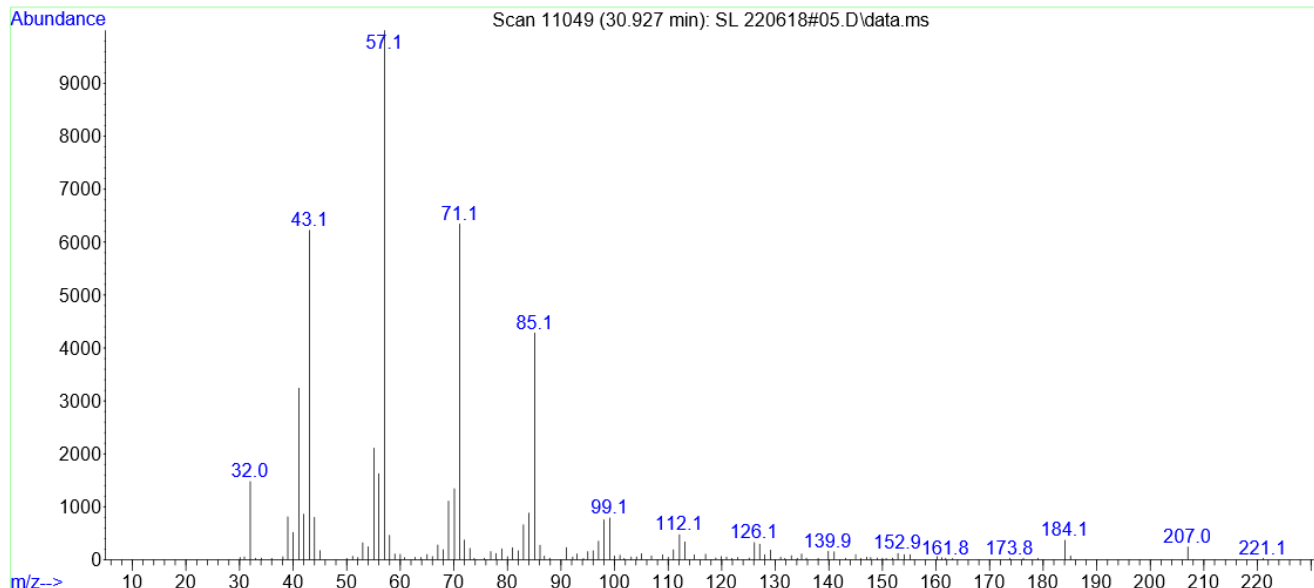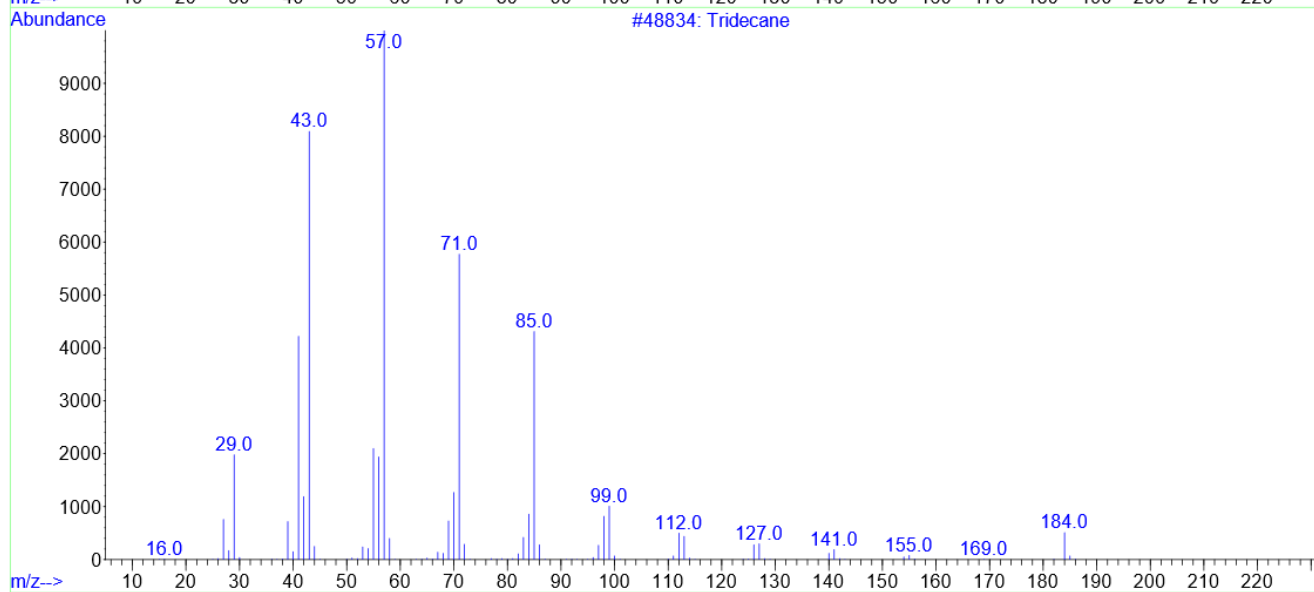

## 88. Tetradecane

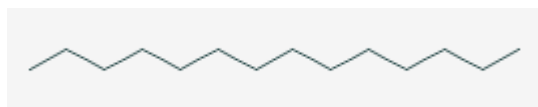

Library Searched : C:\Database\NIST11.L

Quality : 98

ID : Tetradecane

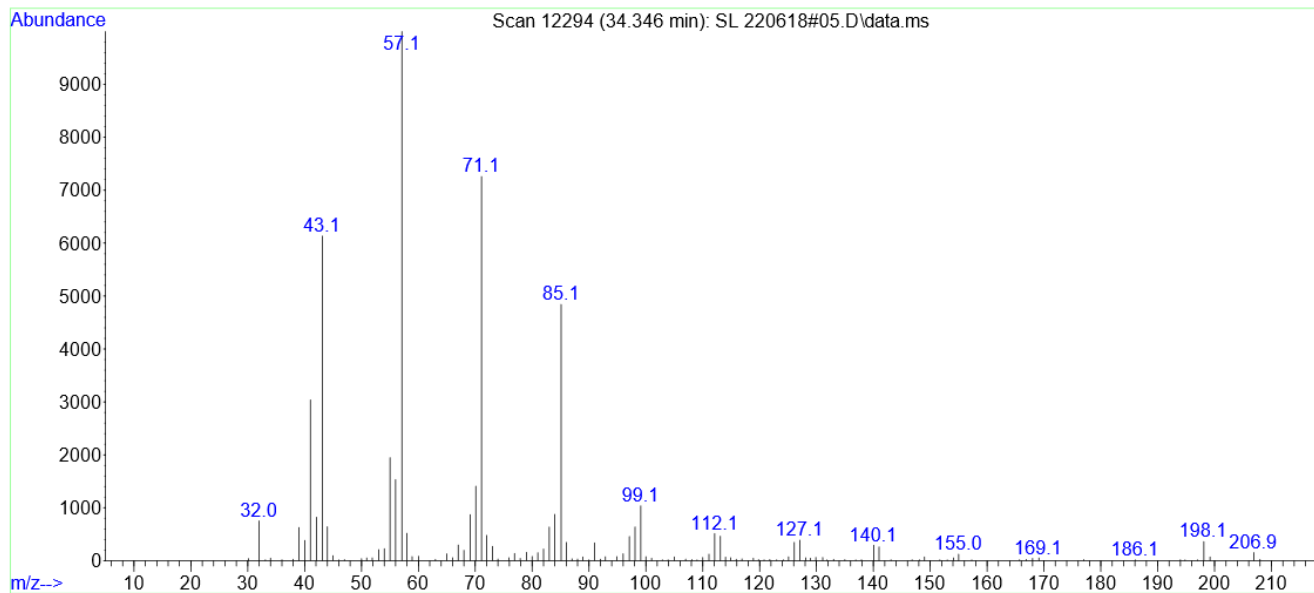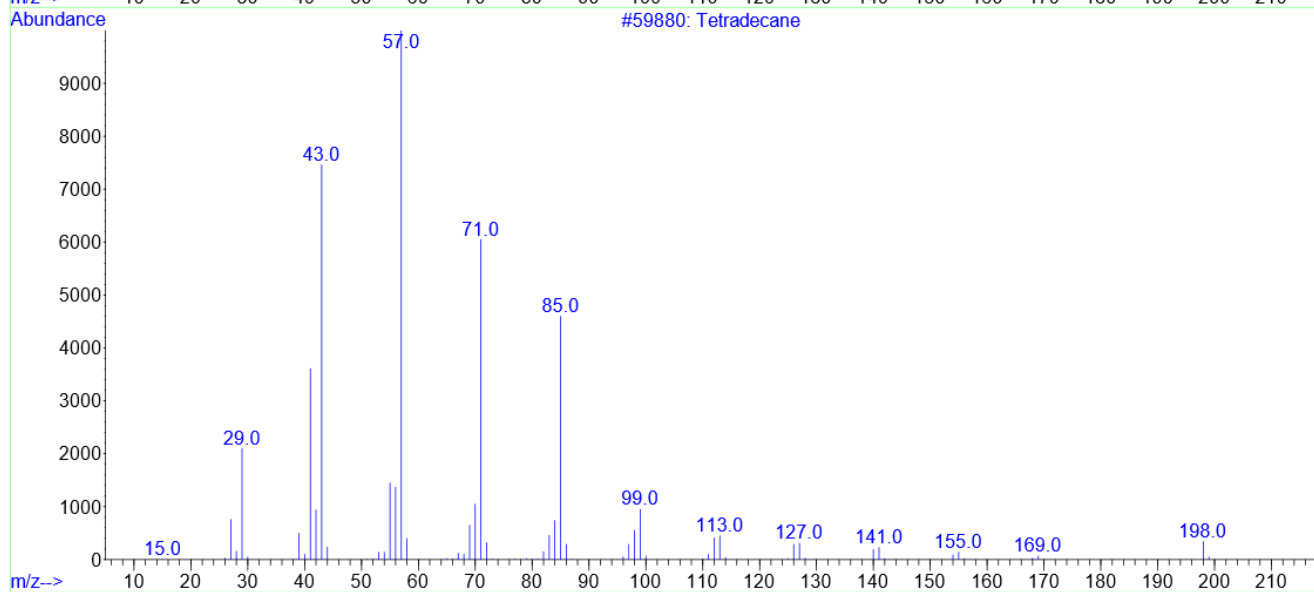



## 89. Pentadecane

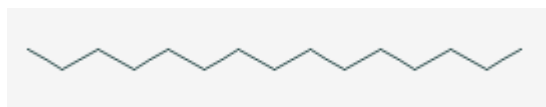

Library Searched : C:\Database\Adams.L

Quality : 90

ID : 28.82 Pentadecane

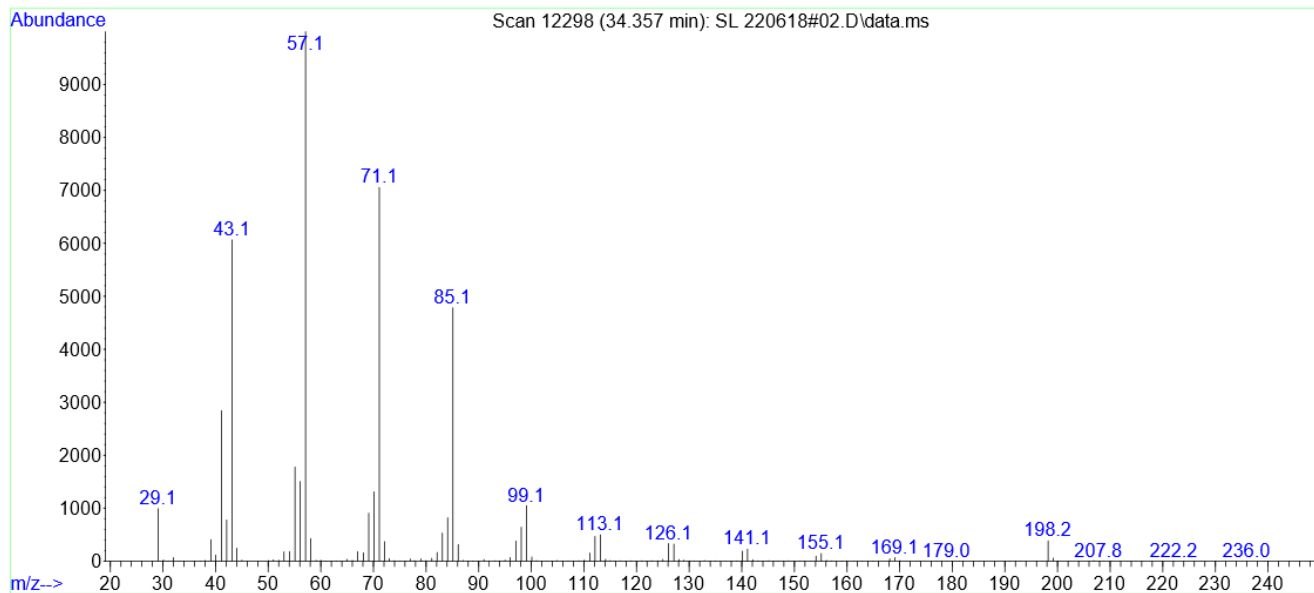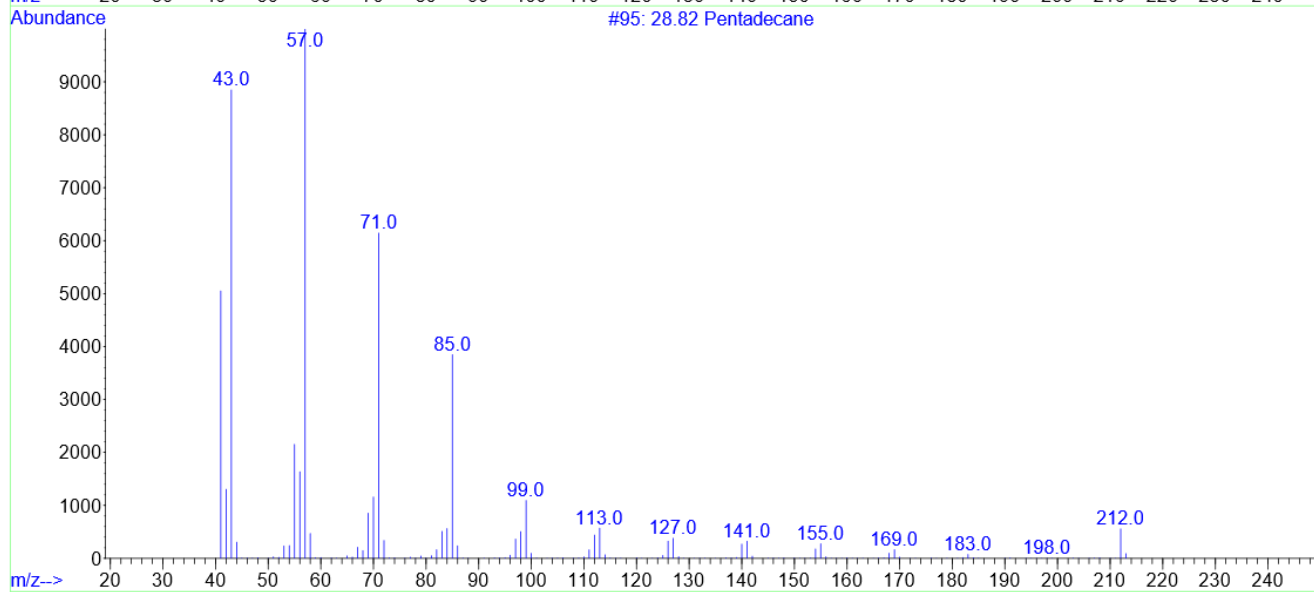

## 90. Hexadecane

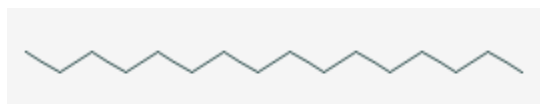

Library Searched : C:\Database\NIST11.L

Quality : 96

ID : Hexadecane

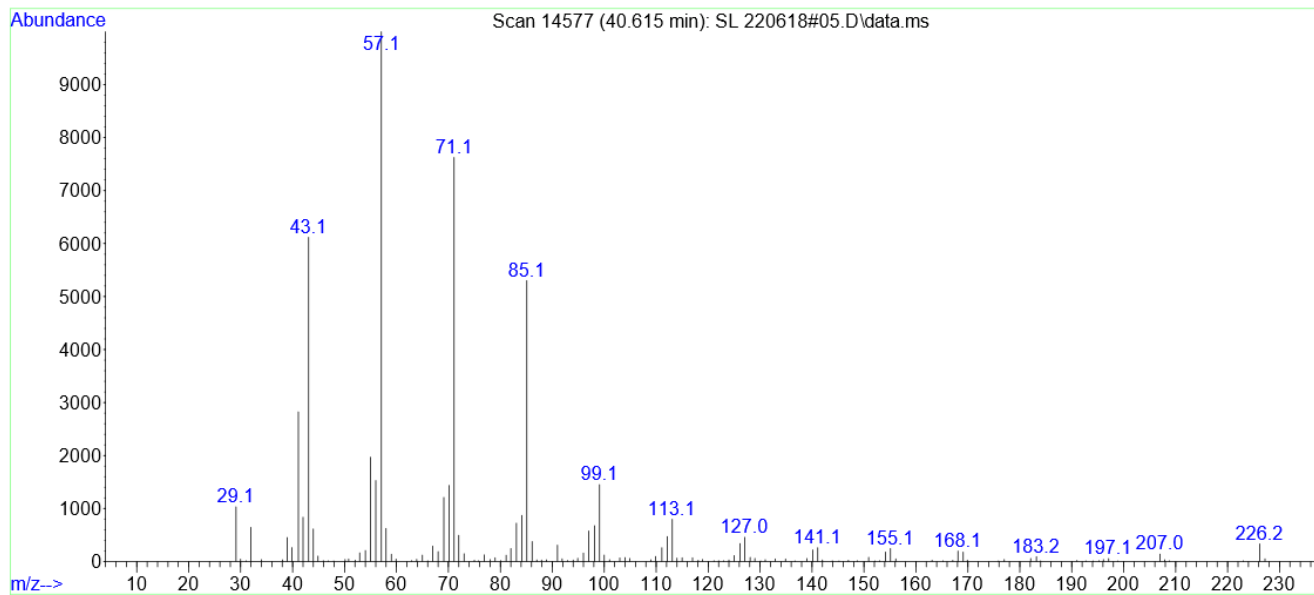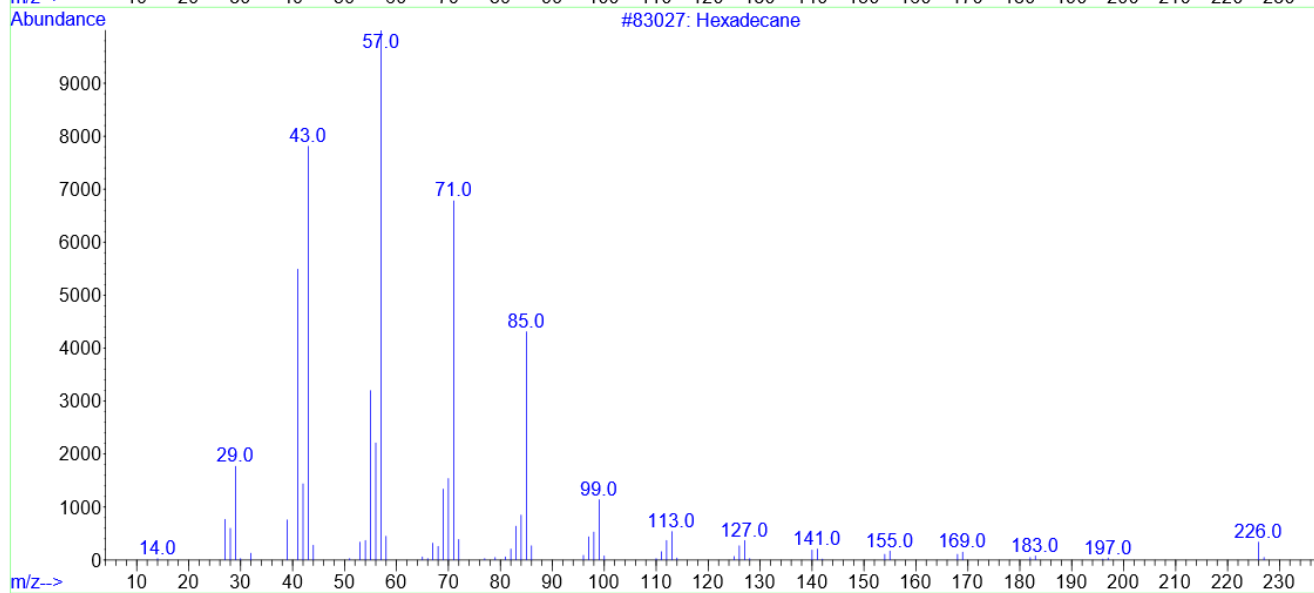

# 91. Heptadecane

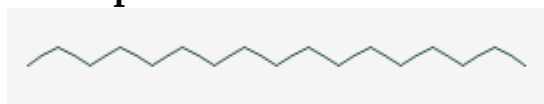

Library Searched : C:\Database\NIST11.L

Quality : 98

ID : Heptadecane

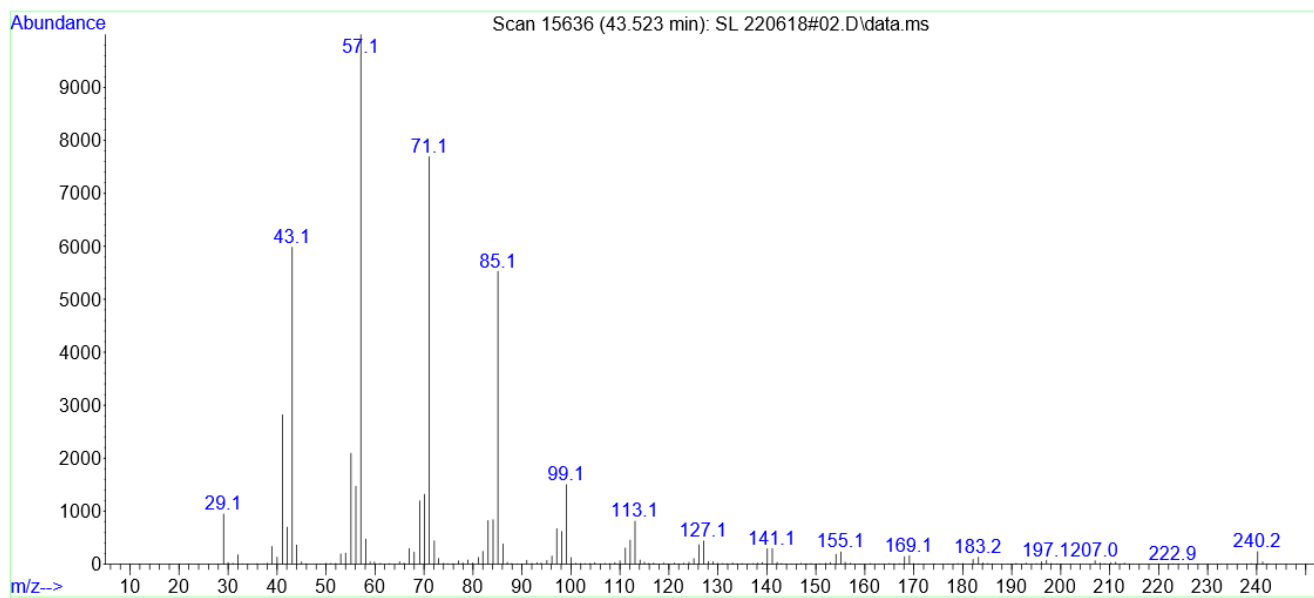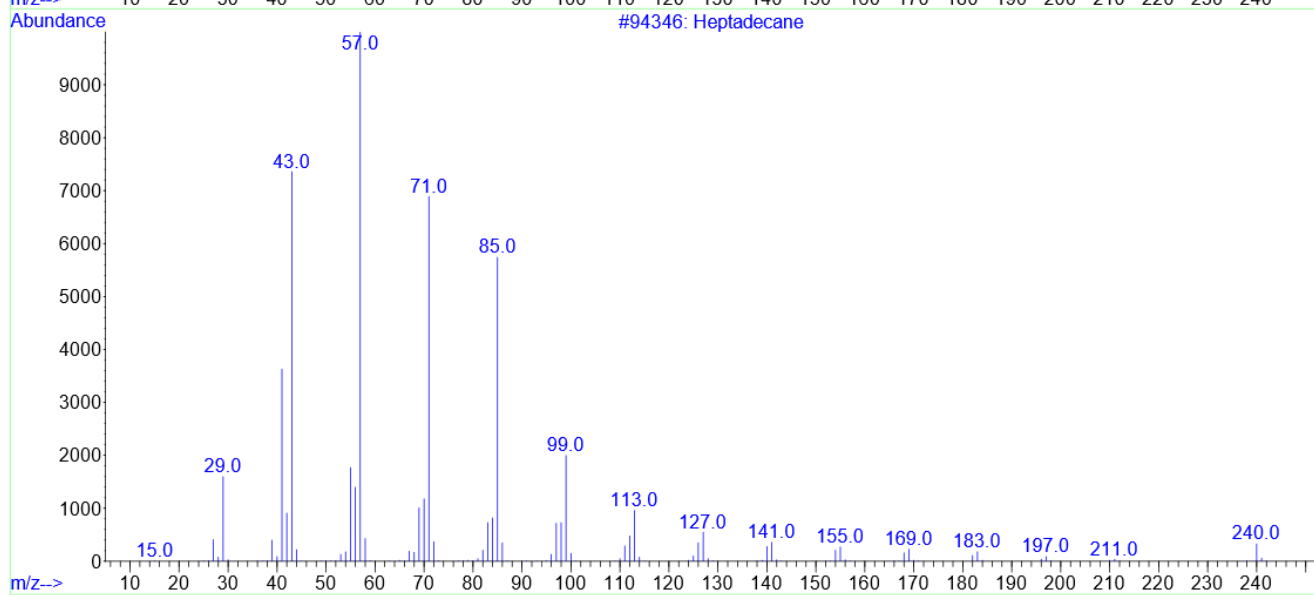

## 92. Octadecane

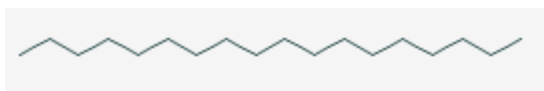

Library Searched : C:\Database\NIST11.L  
Quality : 91  
ID : Octadecane

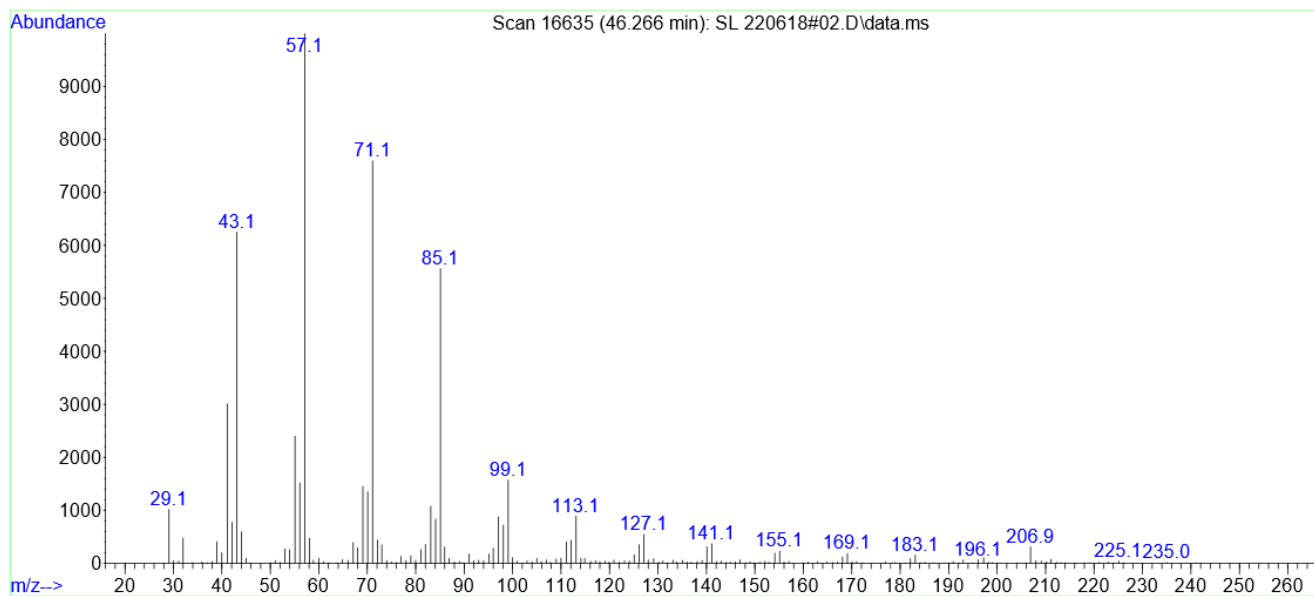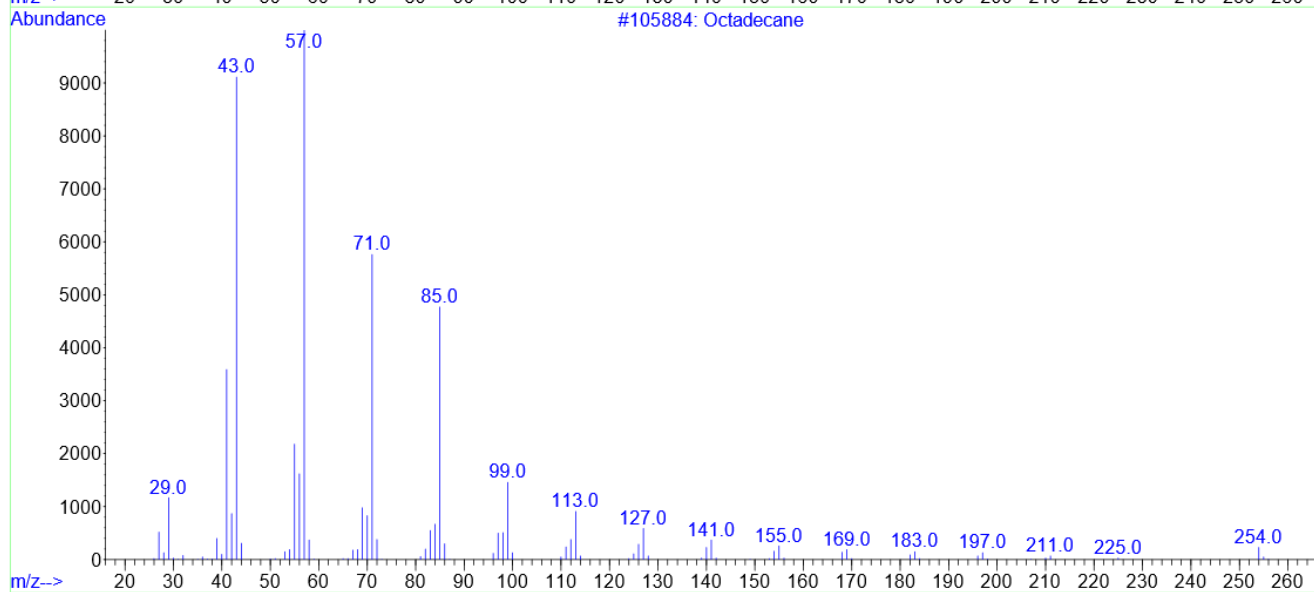

## 94. *p*-cymene

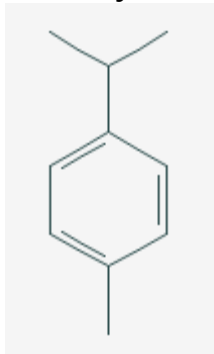

Library Searched : C:\Database\NIST11.L  
Quality : 92  
ID : *p*-Cymene

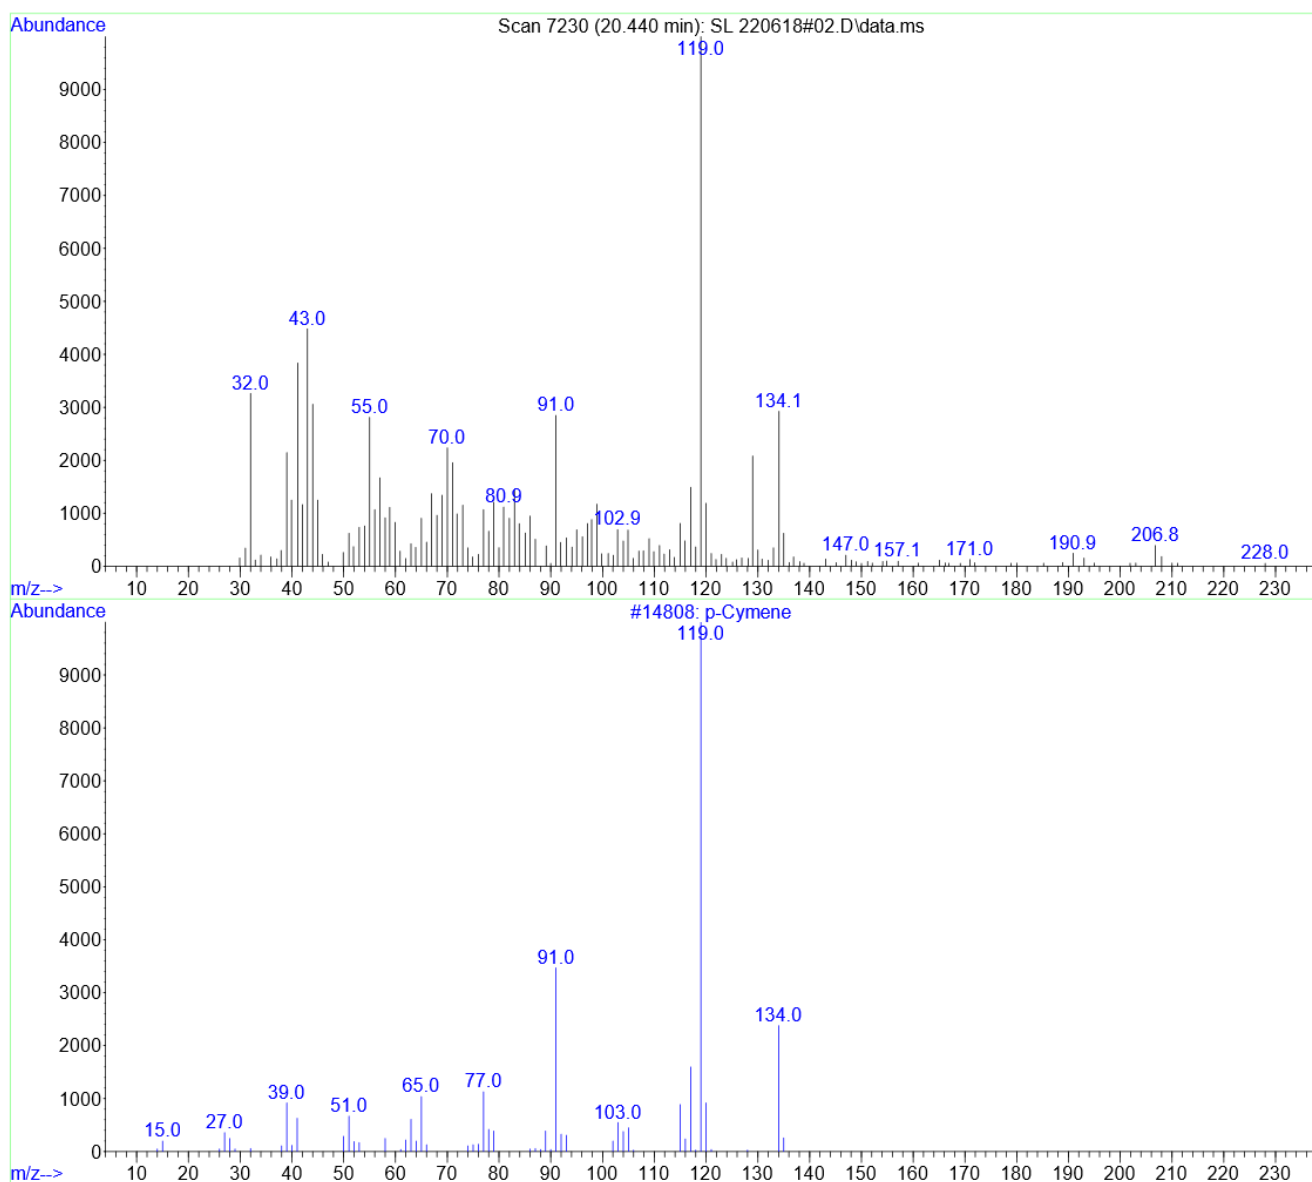

## 95. *O*-cymene

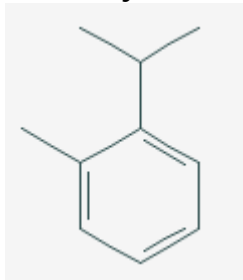

Library Searched : C:\Database\Adams.L

Quality : 95

ID : 8.59 Cymene<ortho->

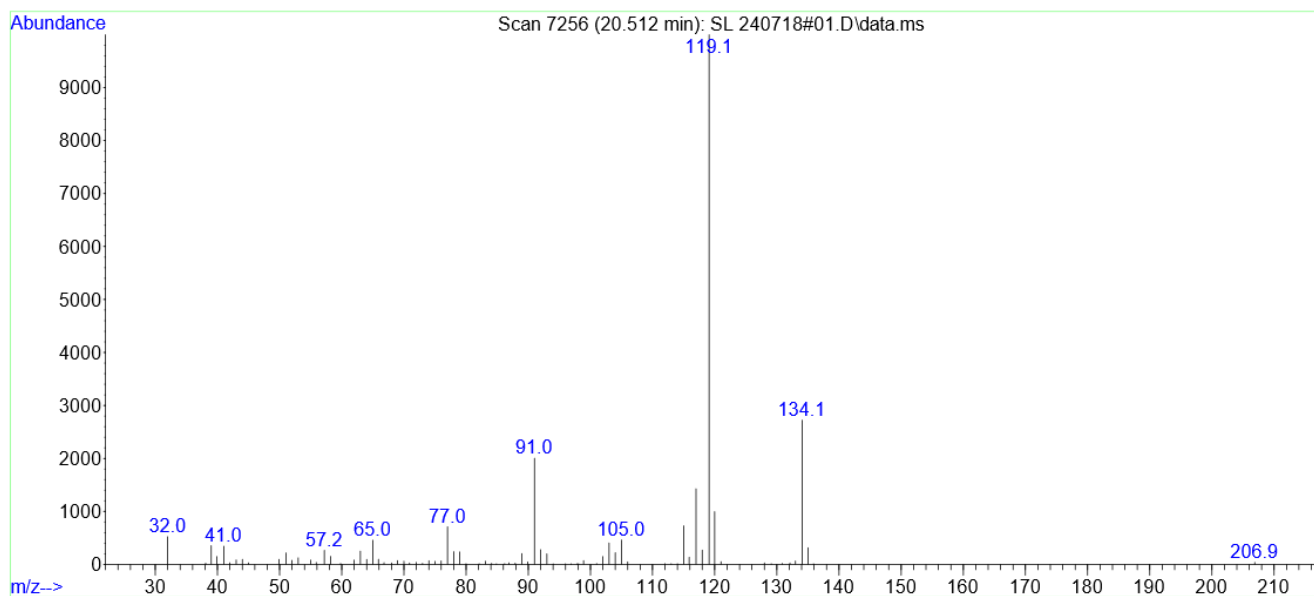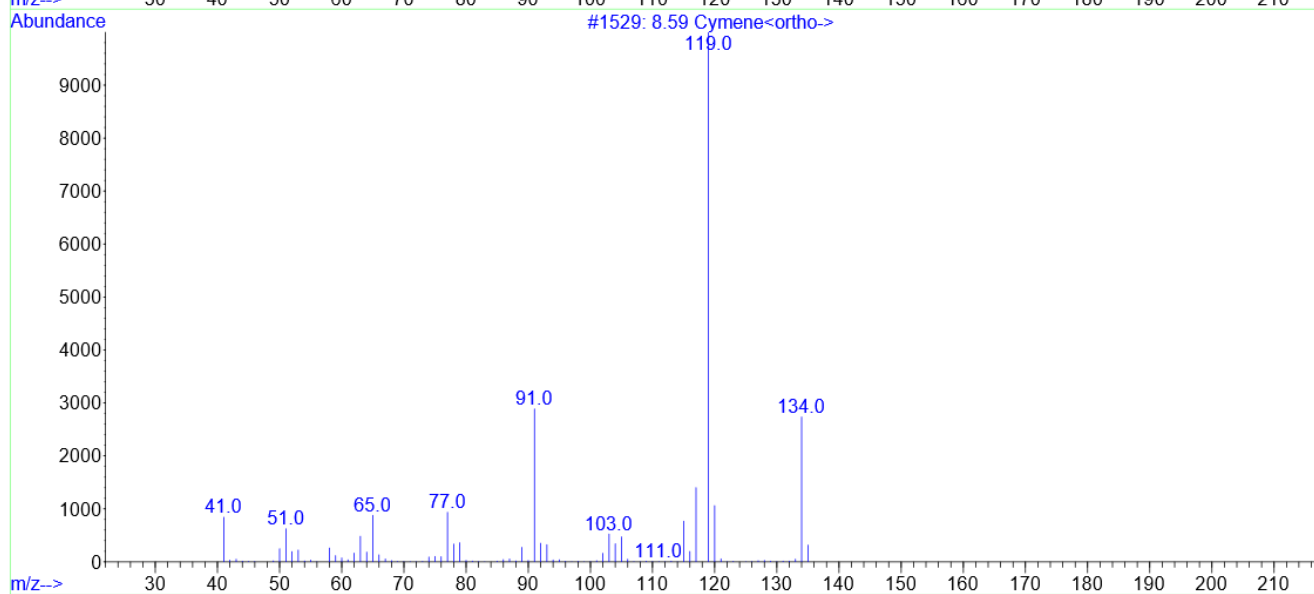

## 96. *D*-limonene

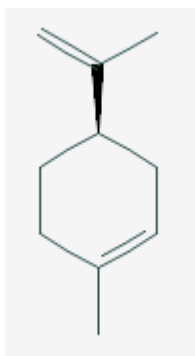

Library Searched : C:\Database\NIST11.L  
Quality : 99  
ID : D-Limonene

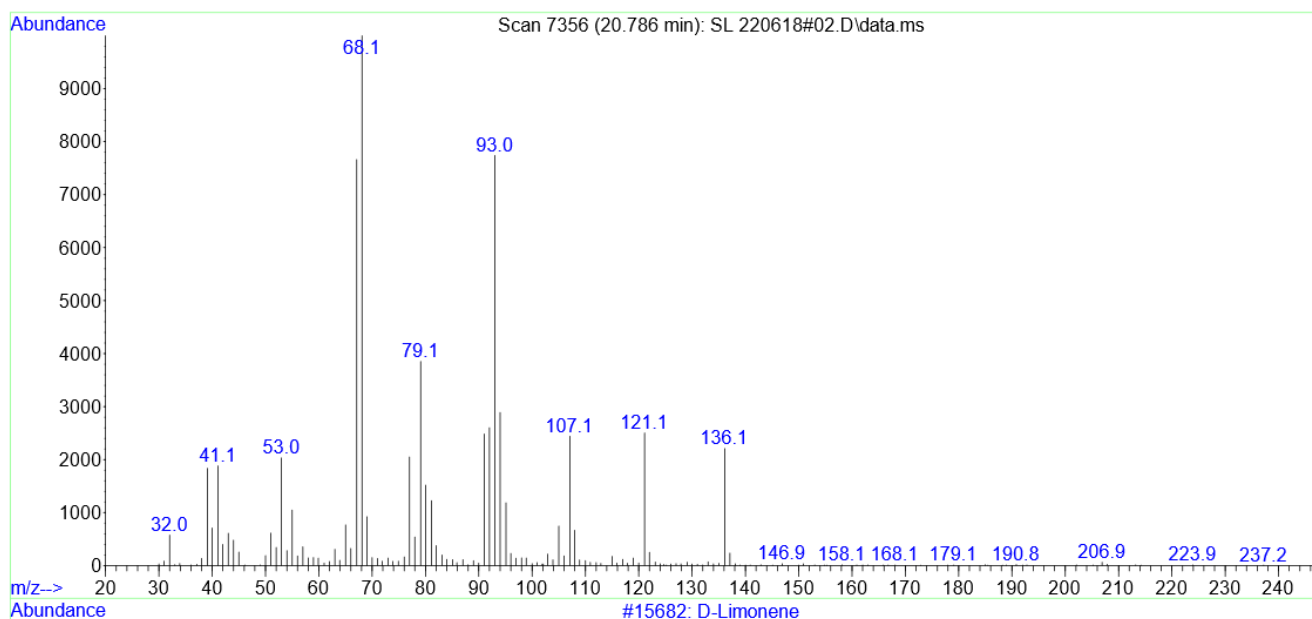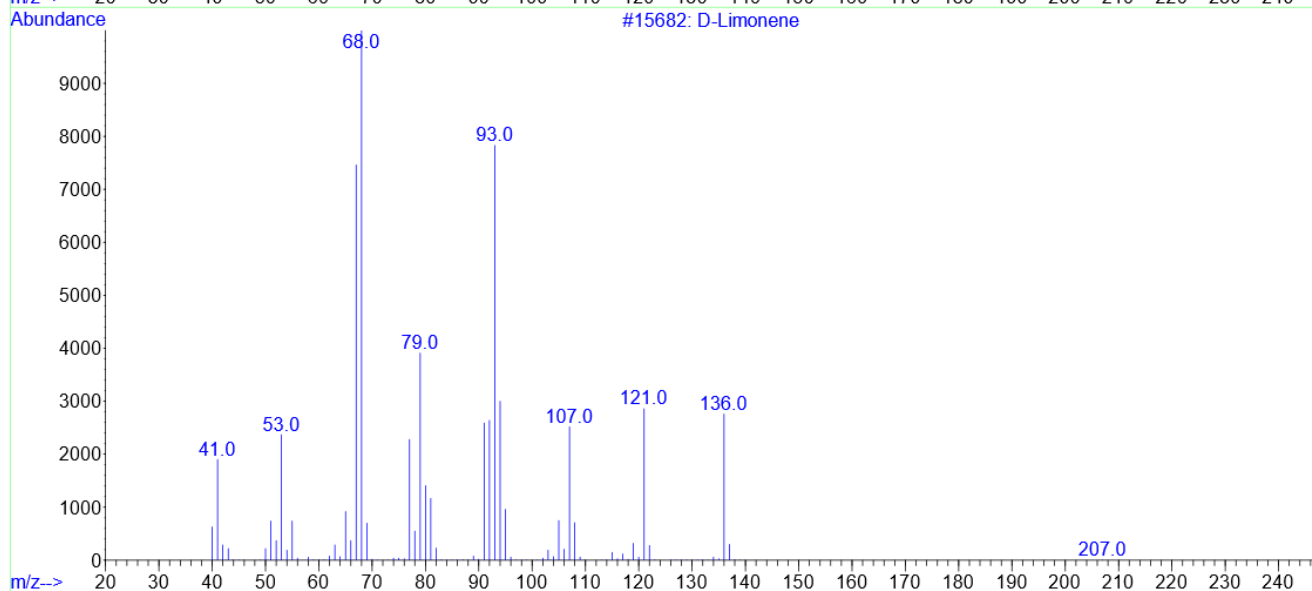

## 97. Eucalyptol

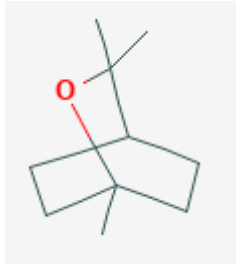

Library Searched : C:\Database\NIST11.L

Quality : 98

ID : Eucalyptol

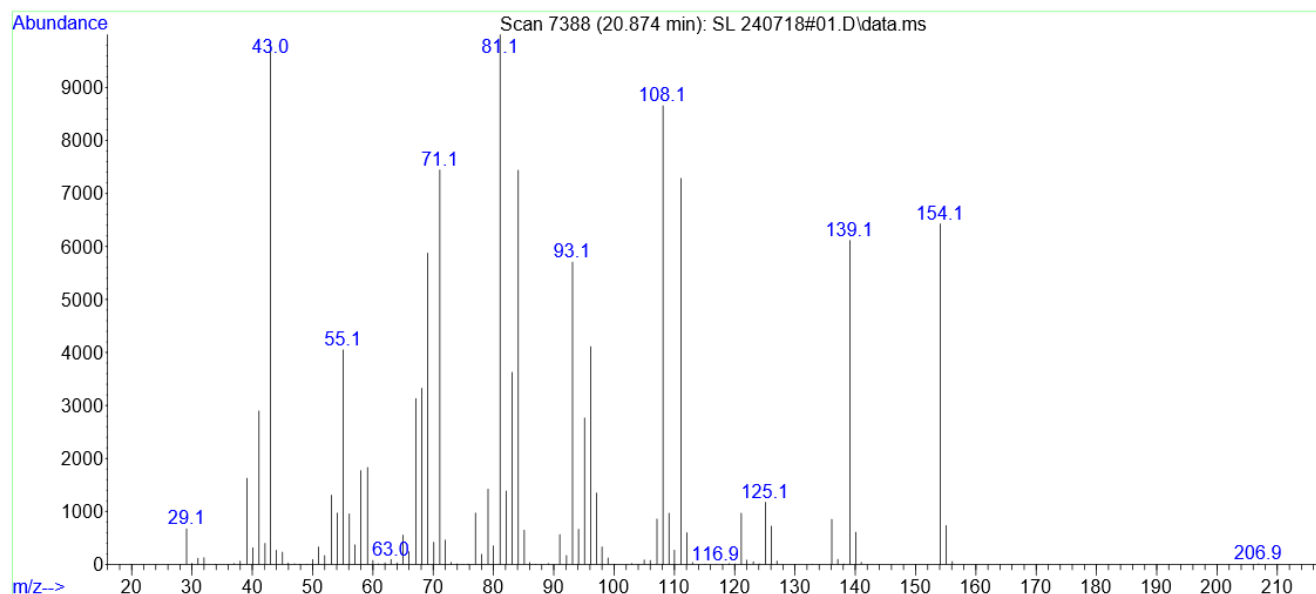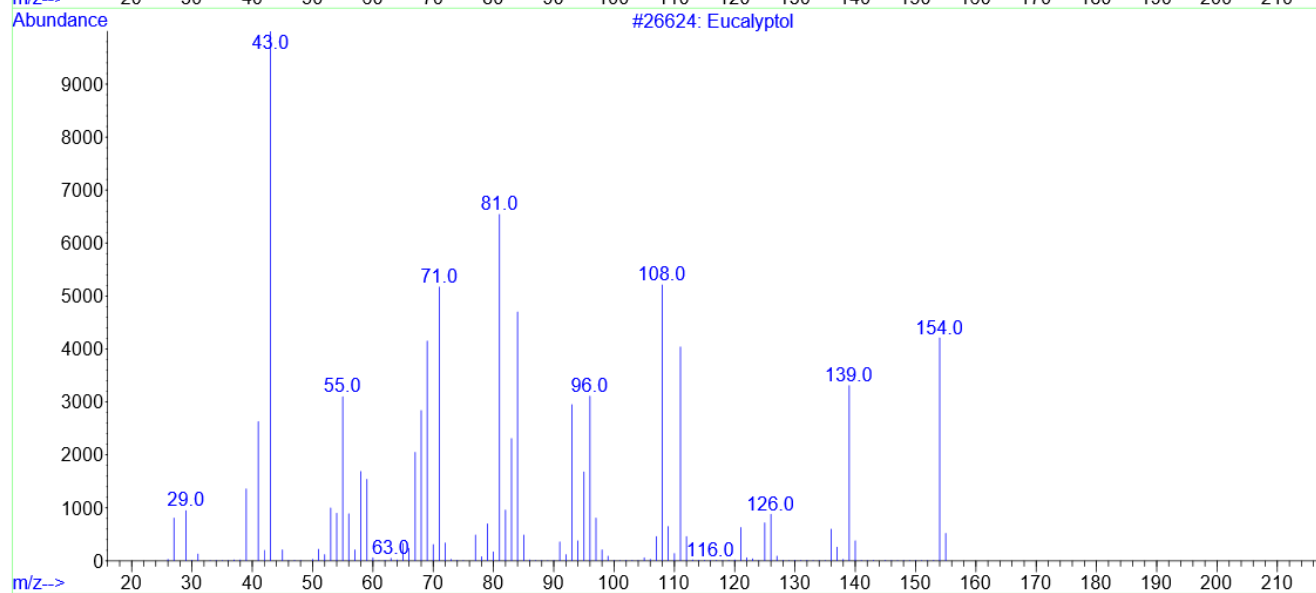



## 98. $\beta$ -ionone

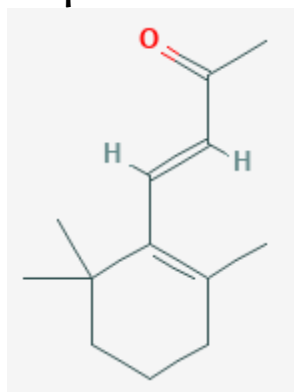

Library Searched : C:\Database\NIST11.L

Quality : 97

ID : 3-Buten-2-one, 4-(2,6,6-trimethyl-1-cyclohexen-1-yl)-

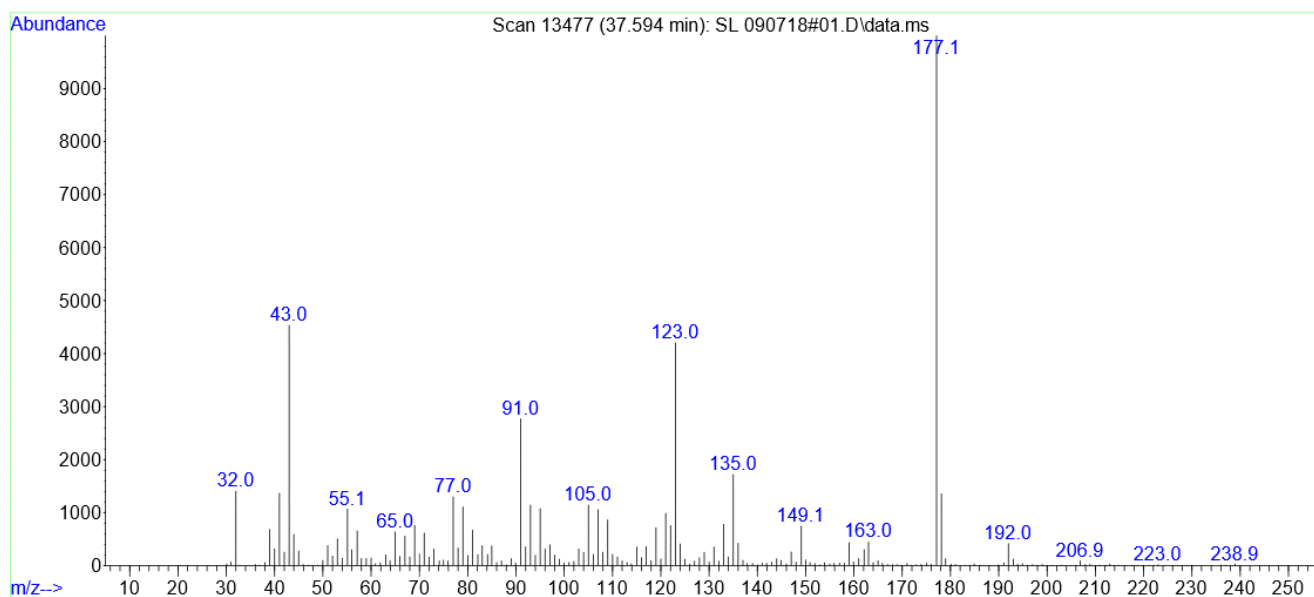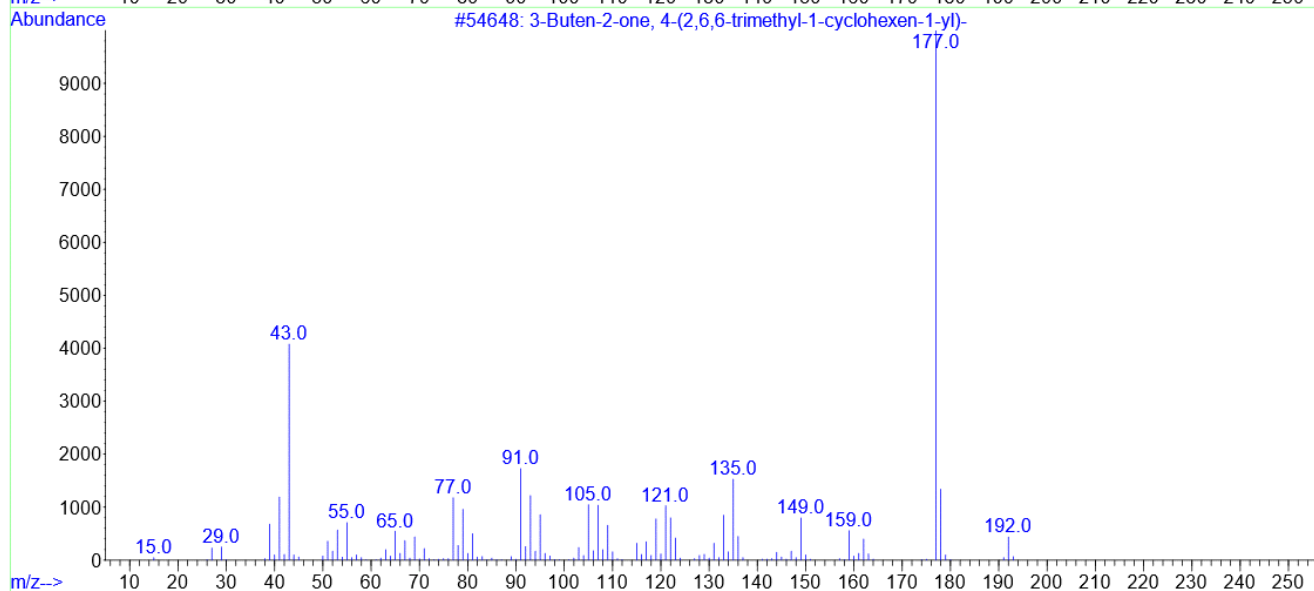

## 99. Allyl isocyanate

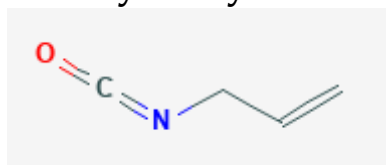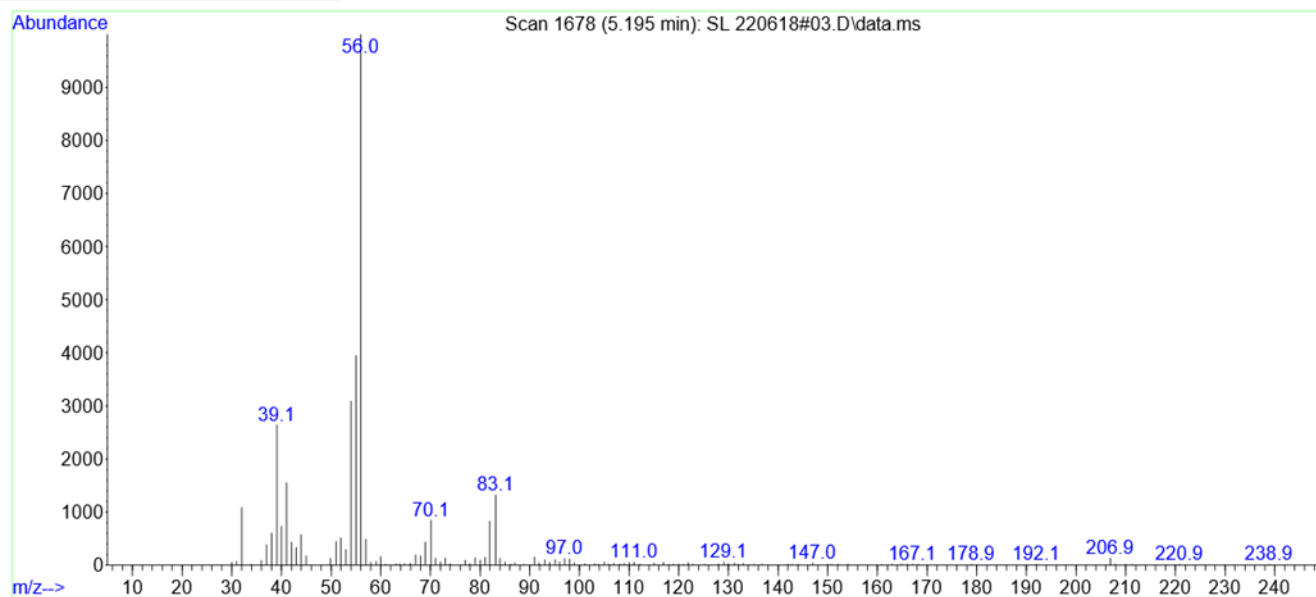

## 100. 2-ethylfuran

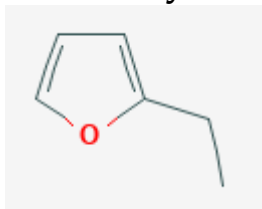

Library Searched : C:\Database\NIST11.L

Quality : 76

ID : Furan, 2-ethyl-

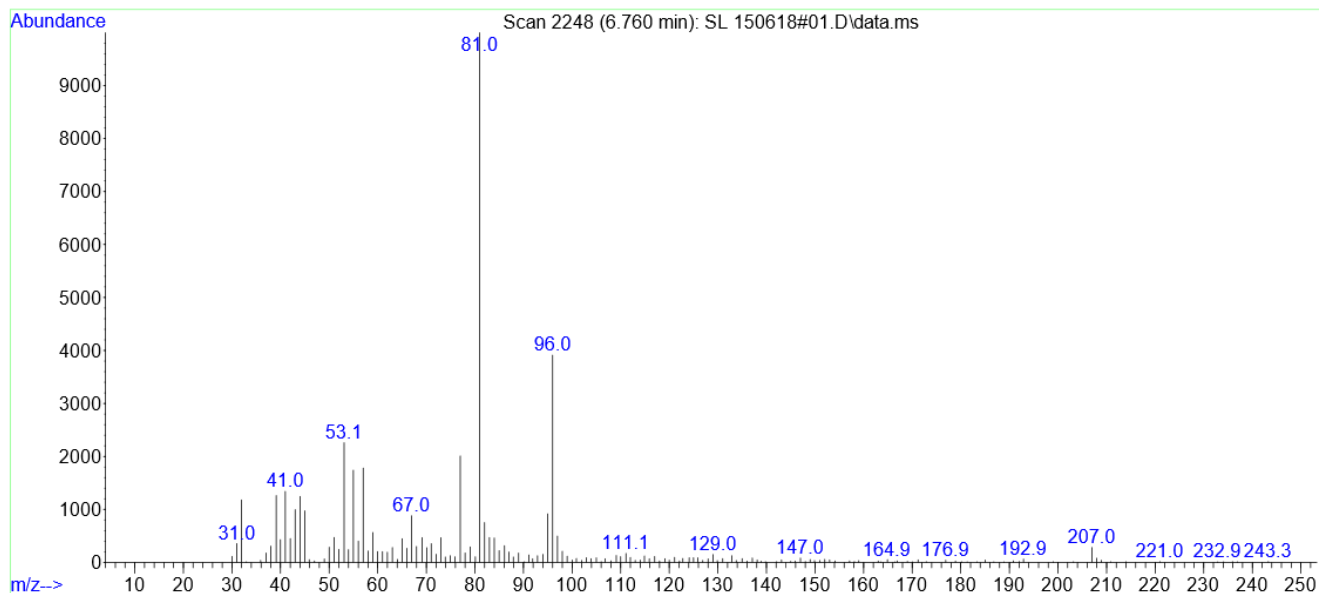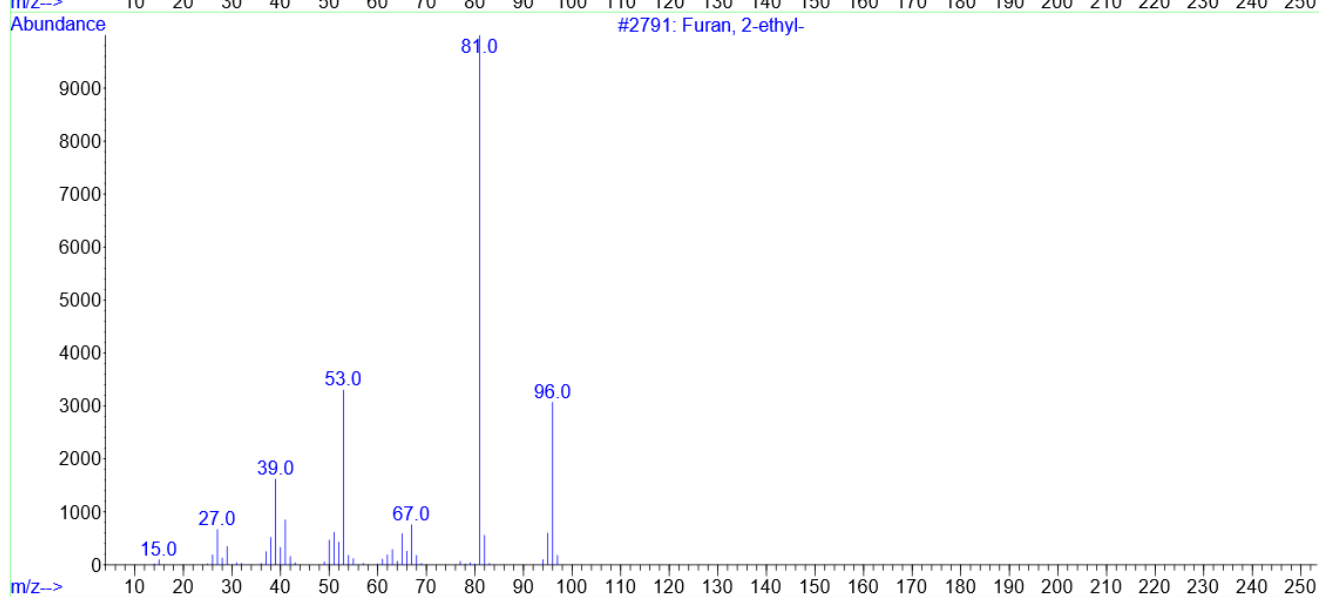

## 102. 2-isopropyl-3-methoxypyrazine

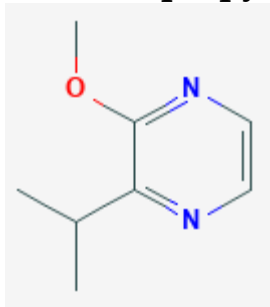

Library Searched : C:\Database\NIST11.L

Quality : 96

ID : Pyrazine, 2-methoxy-3-(1-methylpropyl)-

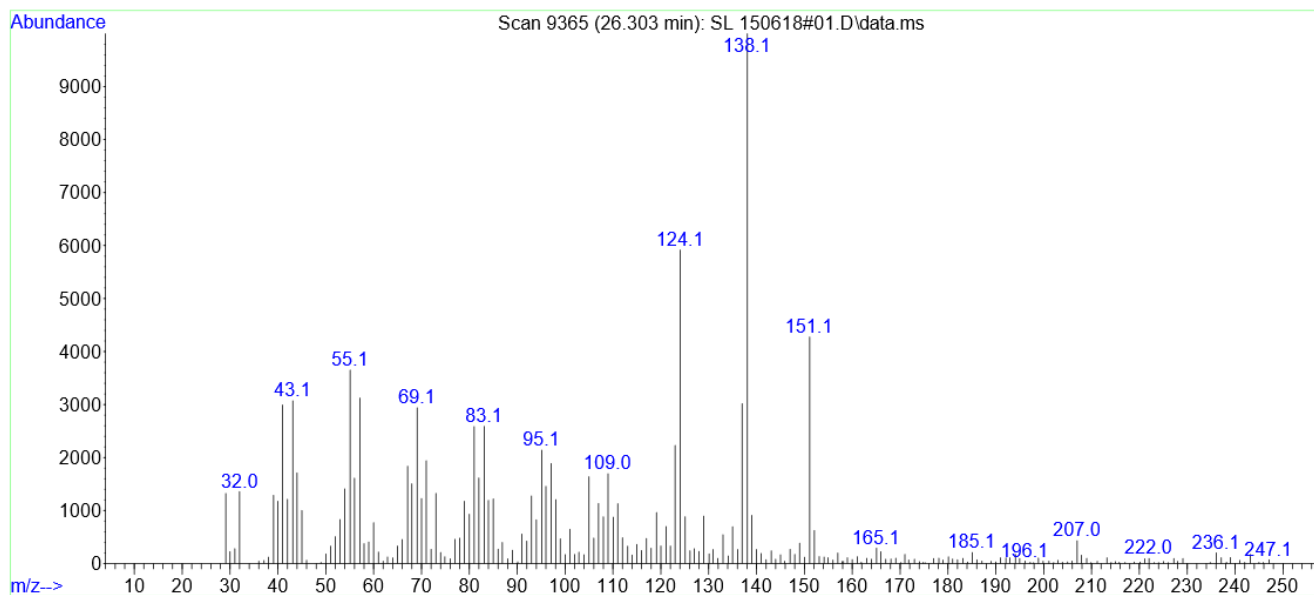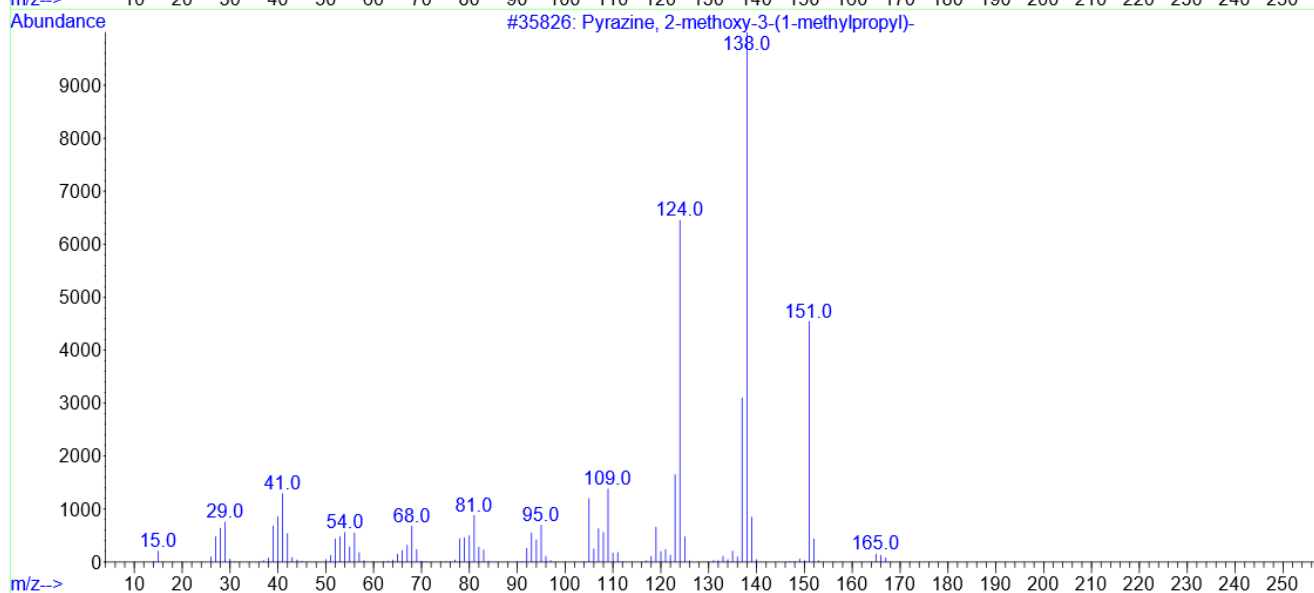

# 103. 1,2,3,5-tetramethylbenzene

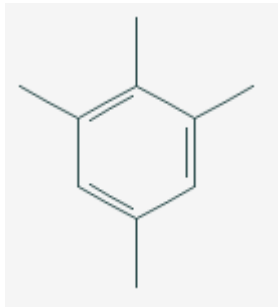

Library Searched : C:\Database\LAB429.L  
Quality : 38  
ID : 1,2,3,5-Tetramethylbenzene

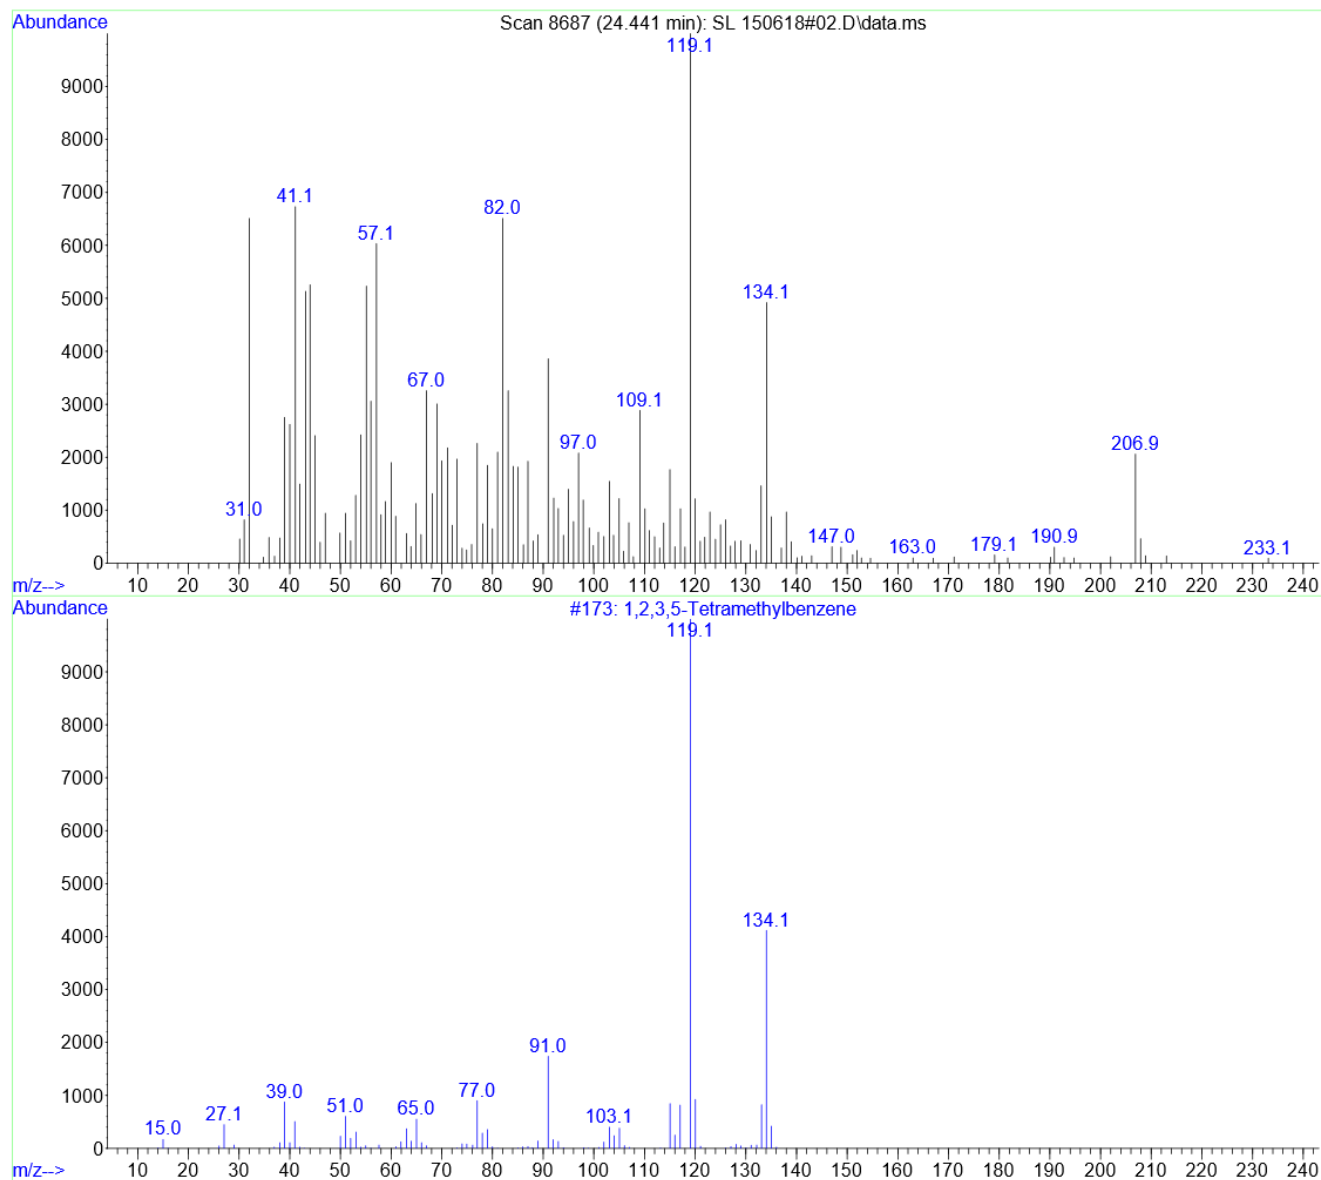

## 104. Veratrole

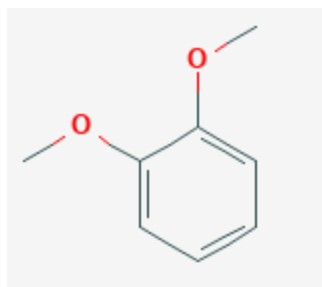

Library Searched : C:\Database\Adams.L

Quality : 87

ID : 13.28 Veratrole

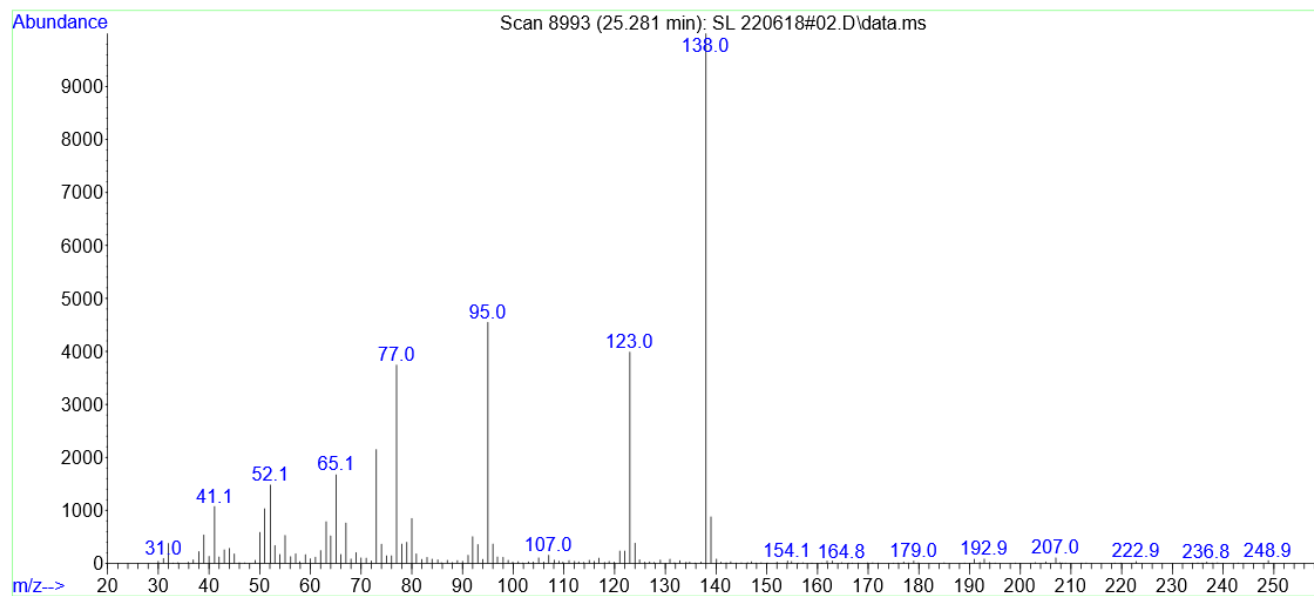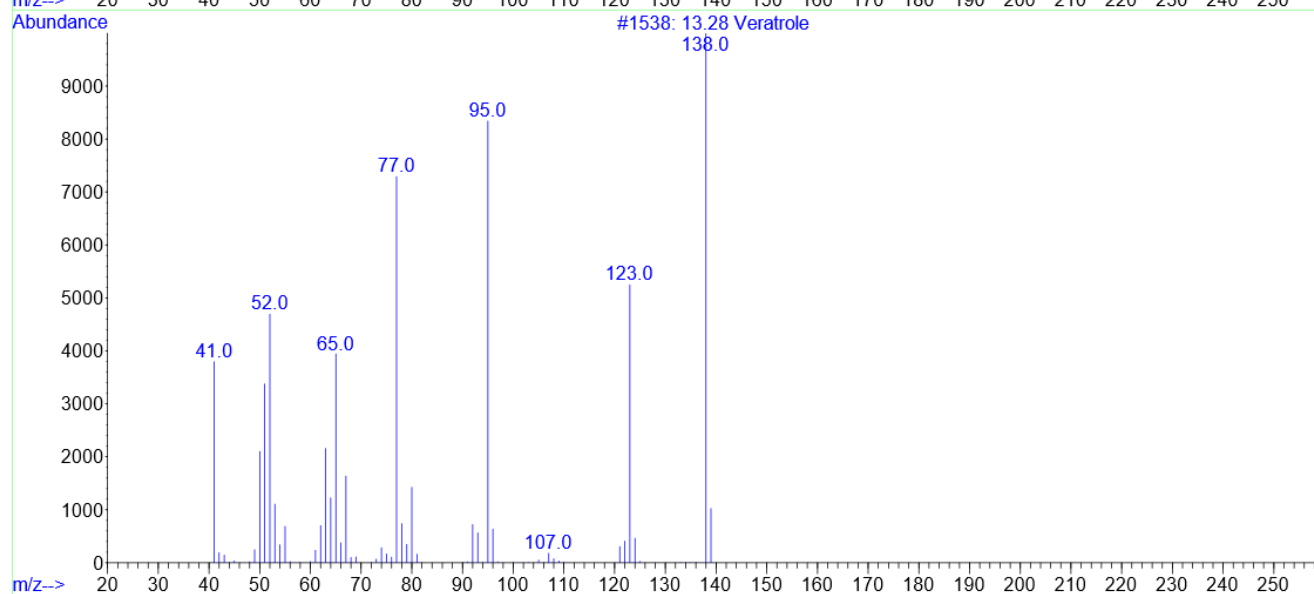

## 105. Octanoic acid

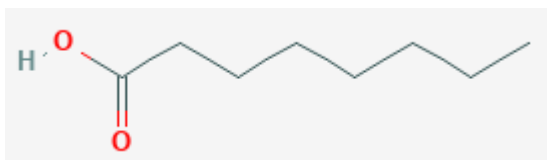

Library Searched : C:\Database\NIST11.L  
Quality : 64  
ID : Octanoic acid

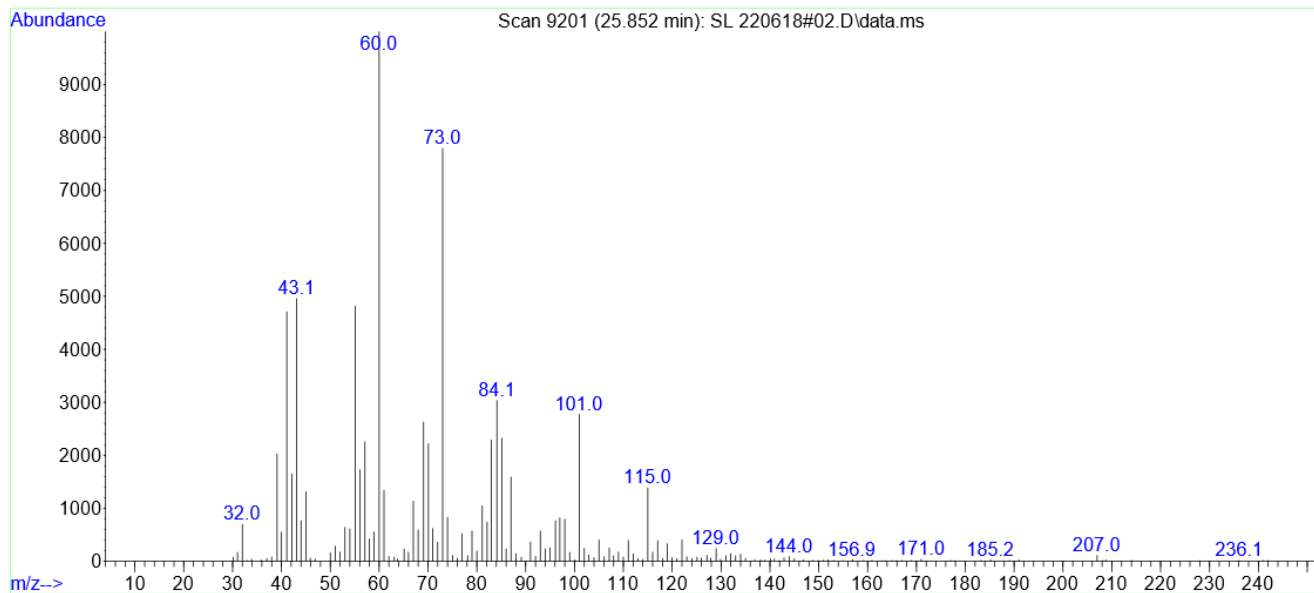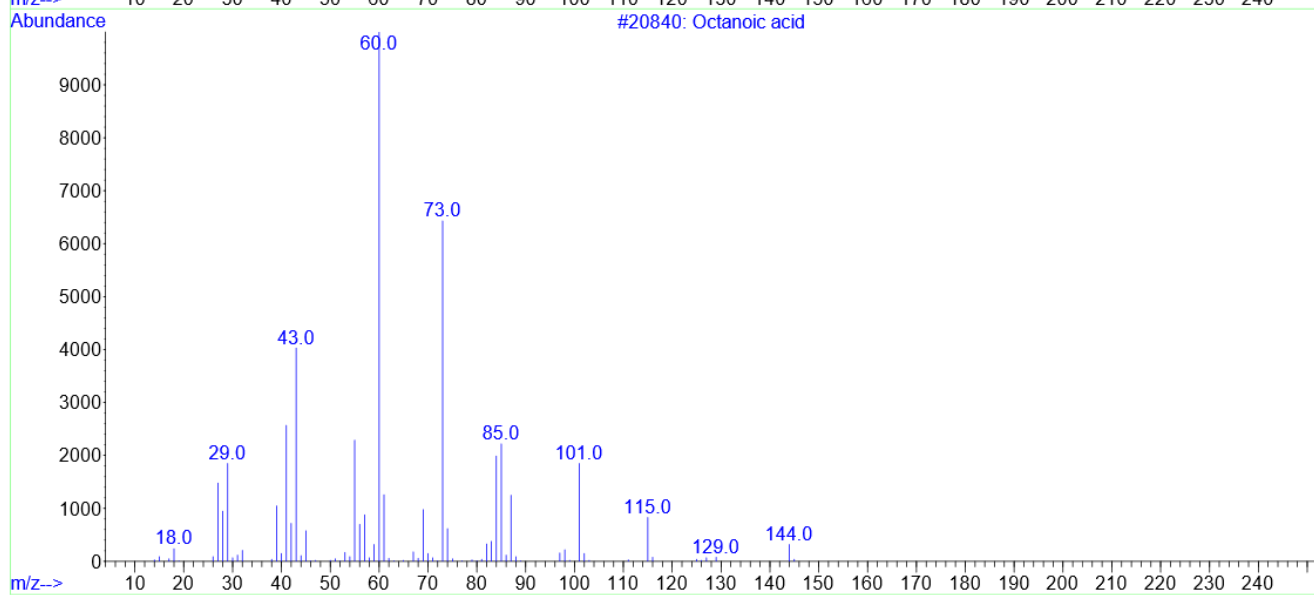

## 106. 2-*sec*-butyl-3-methoxypyrazine

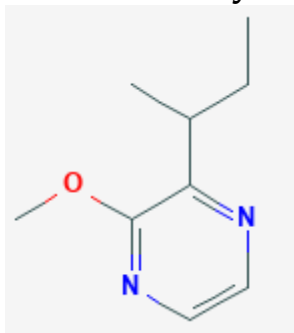

Library Searched : C:\Database\NIST11.L

Quality : 97

ID : Pyrazine, 2-methoxy-3-(1-methylpropyl)-

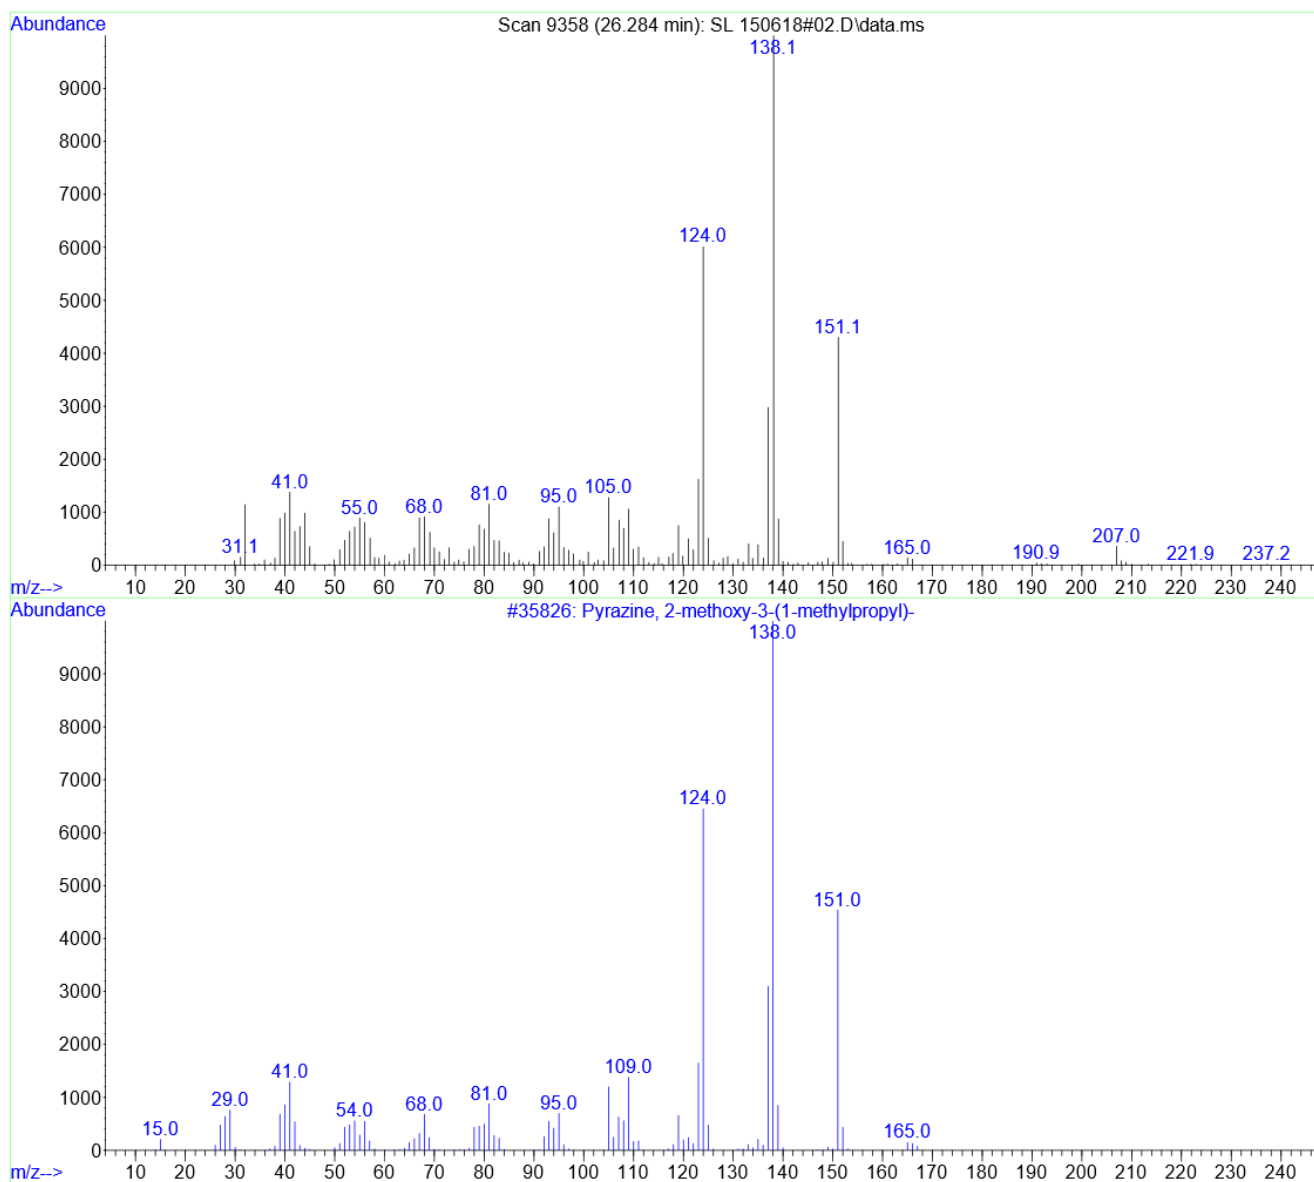



## 107. Phenethyl isocyanate

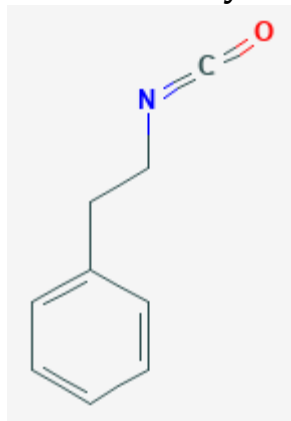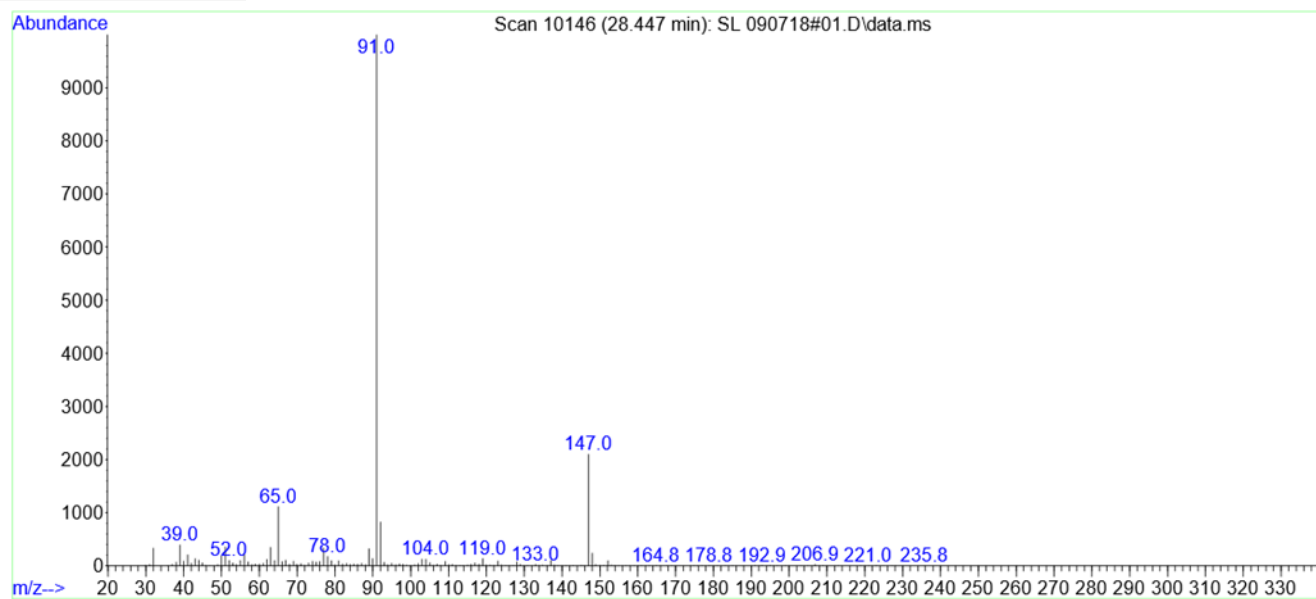

## 108. Quinoline

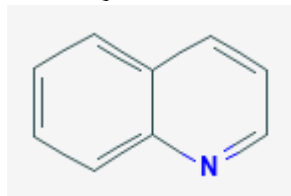

Library Searched : C:\Database\NIST11.L

Quality : 95

ID : Quinoline

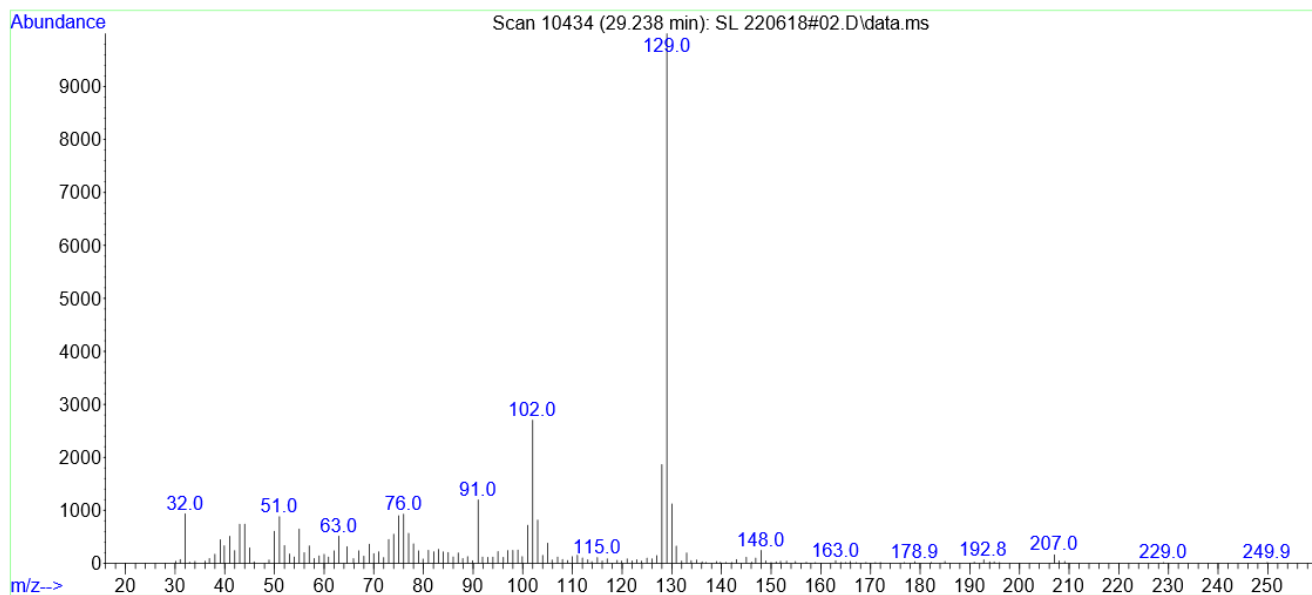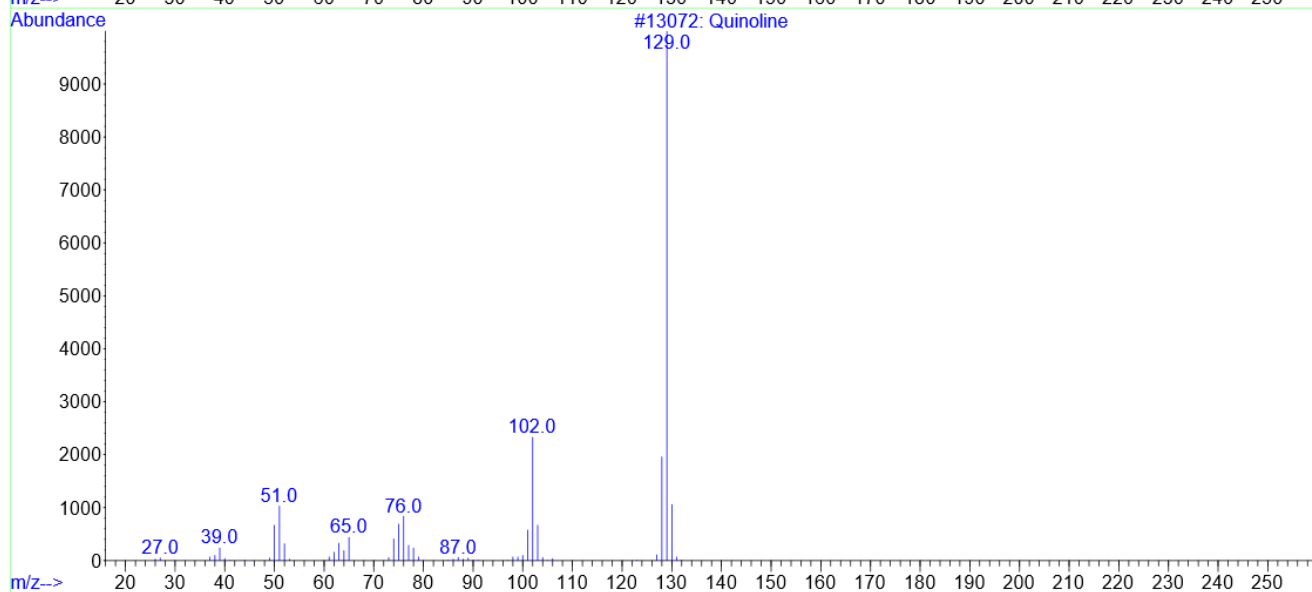

## 109. Caprolactam

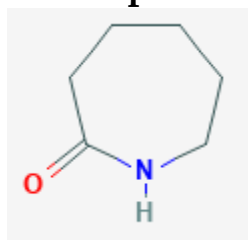

Library Searched : C:\Database\NIST11.L

Quality : 46

ID : Caprolactam

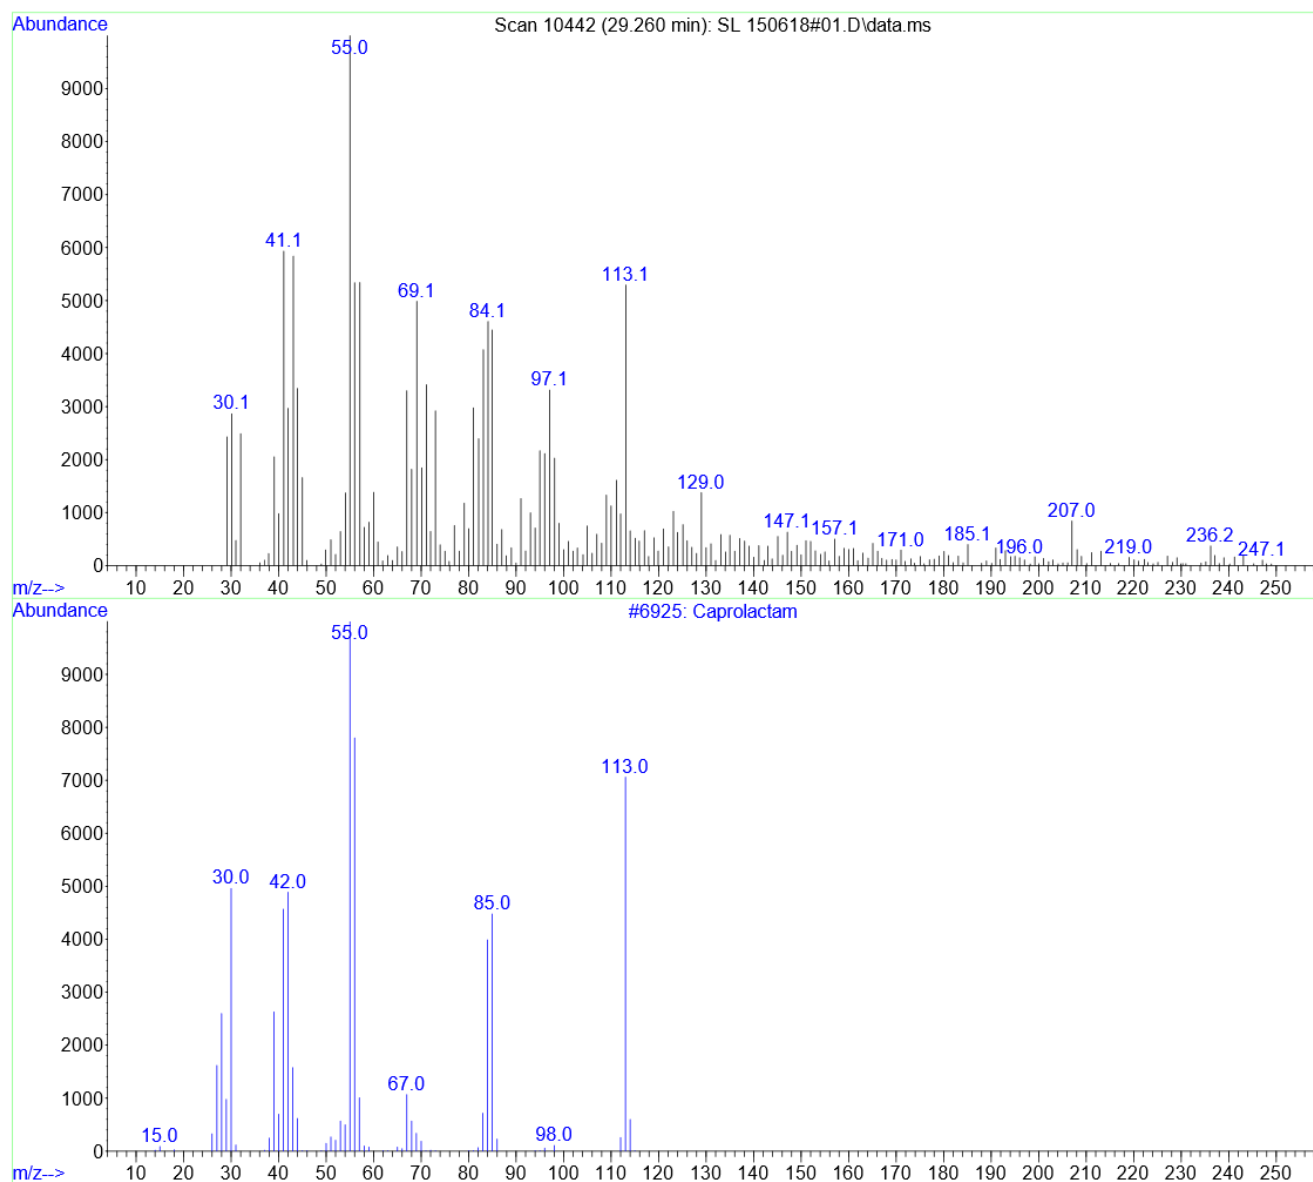

# 110. 4-bromophenol

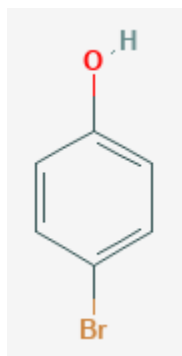

Library Searched : C:\Database\NIST11.L  
Quality : 97  
ID : Phenol, 4-bromo-

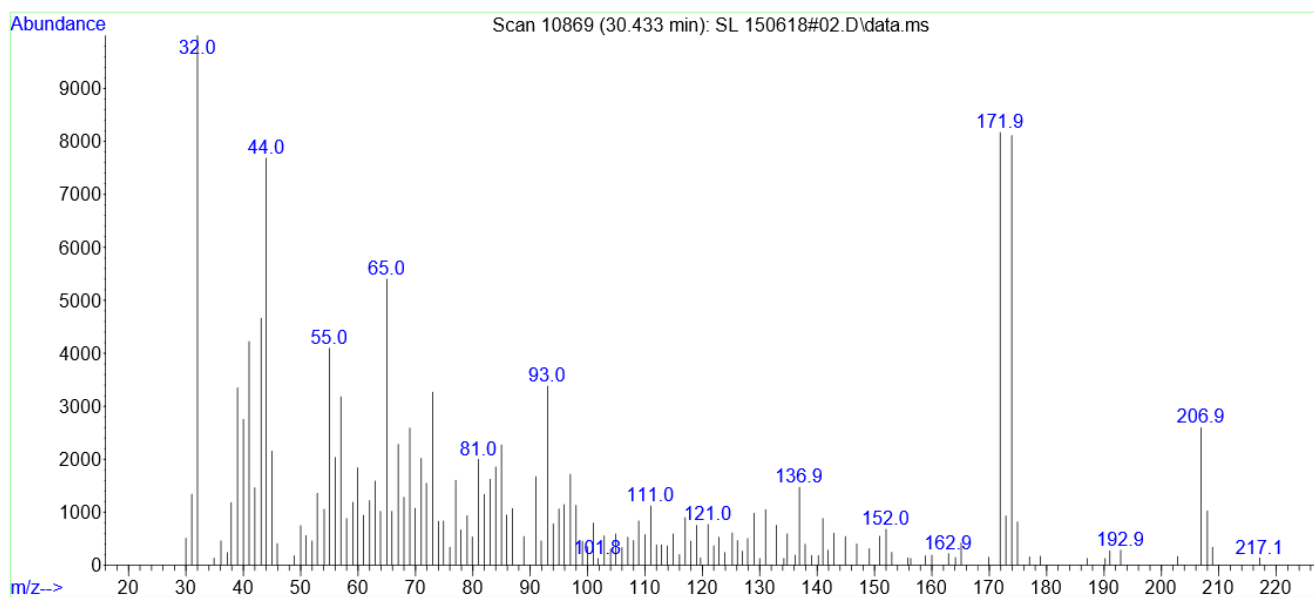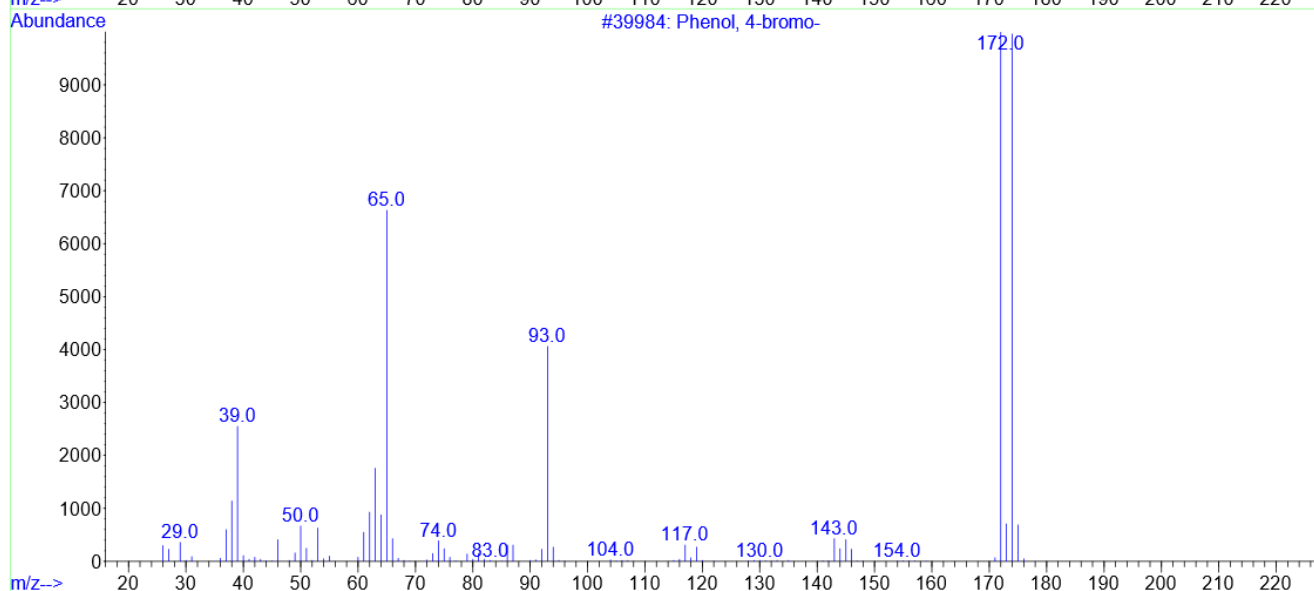

# 111. 6-methylquinoline

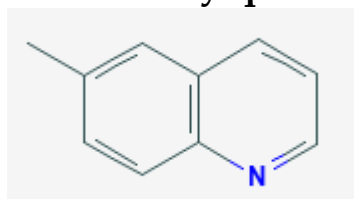

Library Searched : C:\Database\NIST11.L

Quality : 94

ID : Quinoline, 6-methyl-

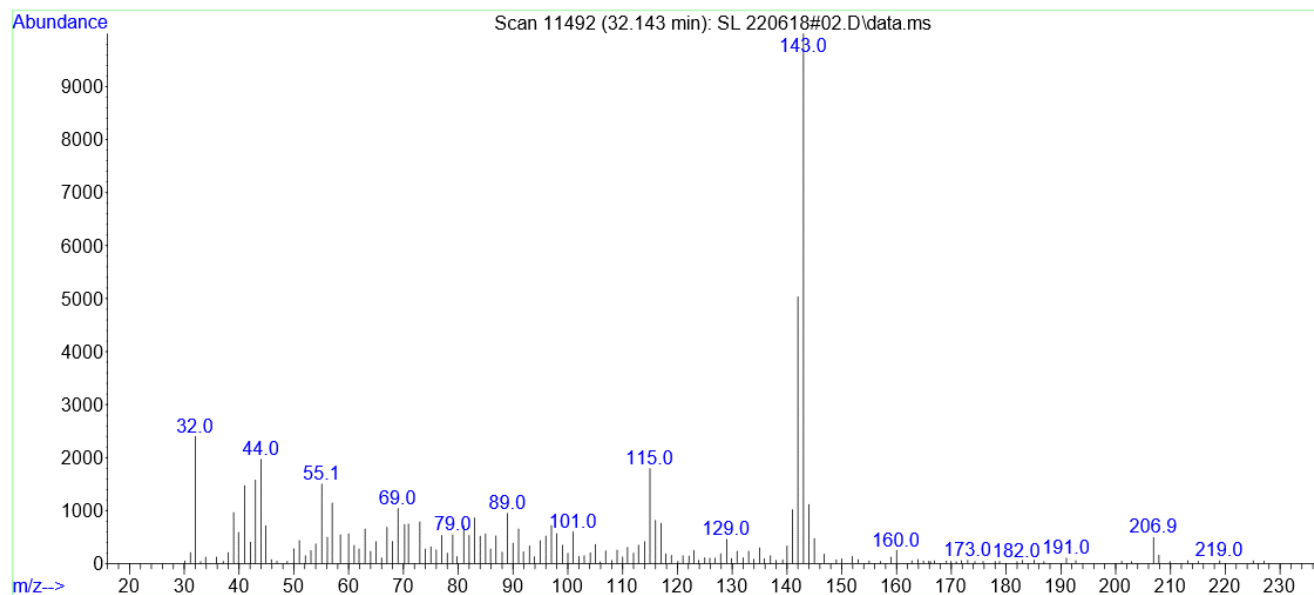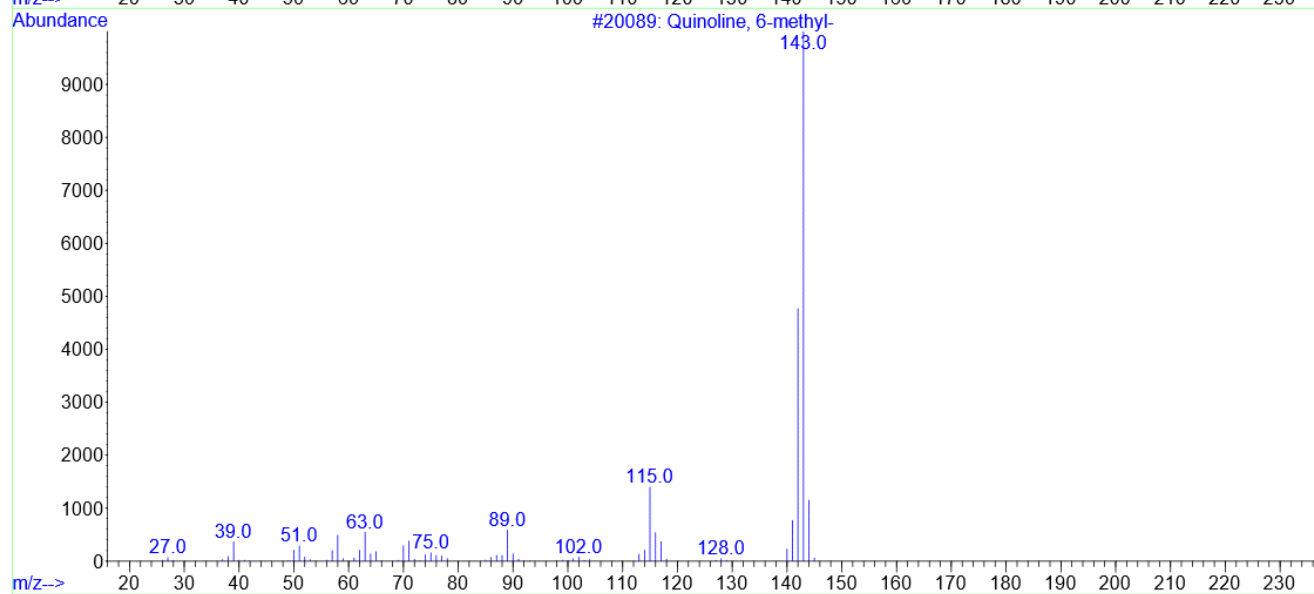

## 112. Methyleugenol

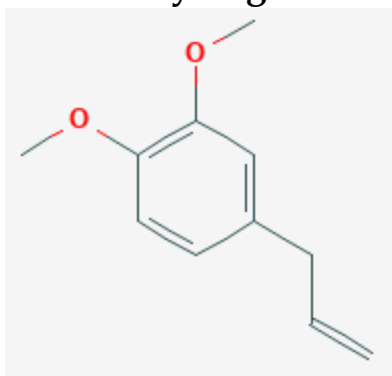

Library Searched : C:\Database\NIST11.L  
Quality : 64  
ID : Methyleugenol

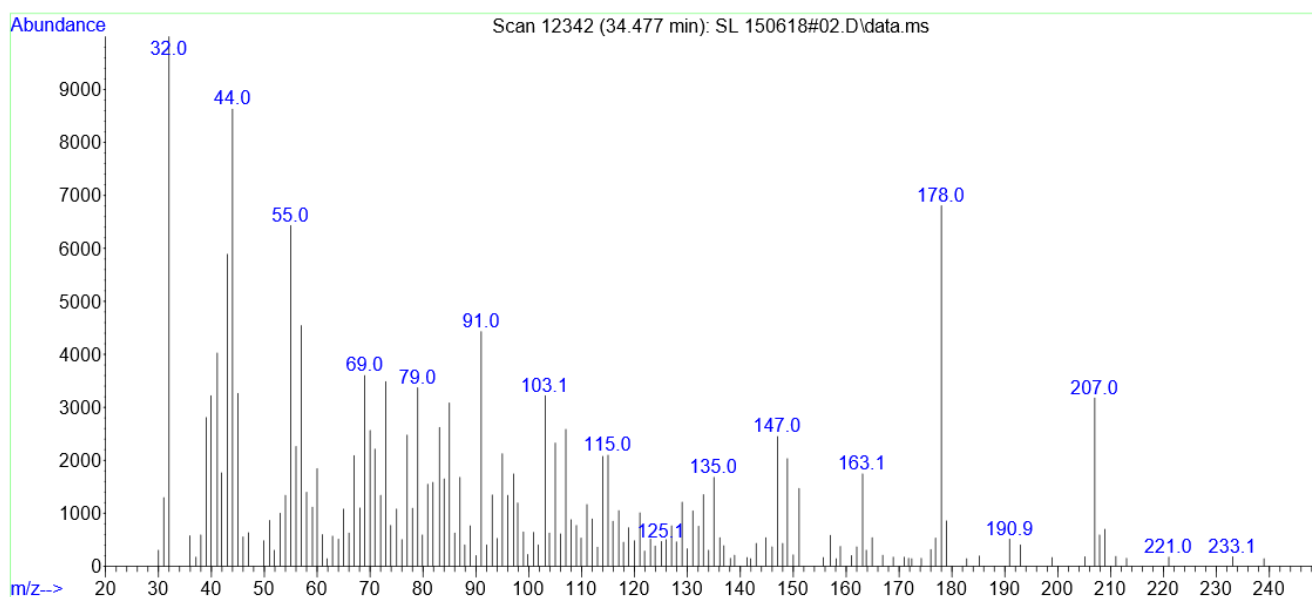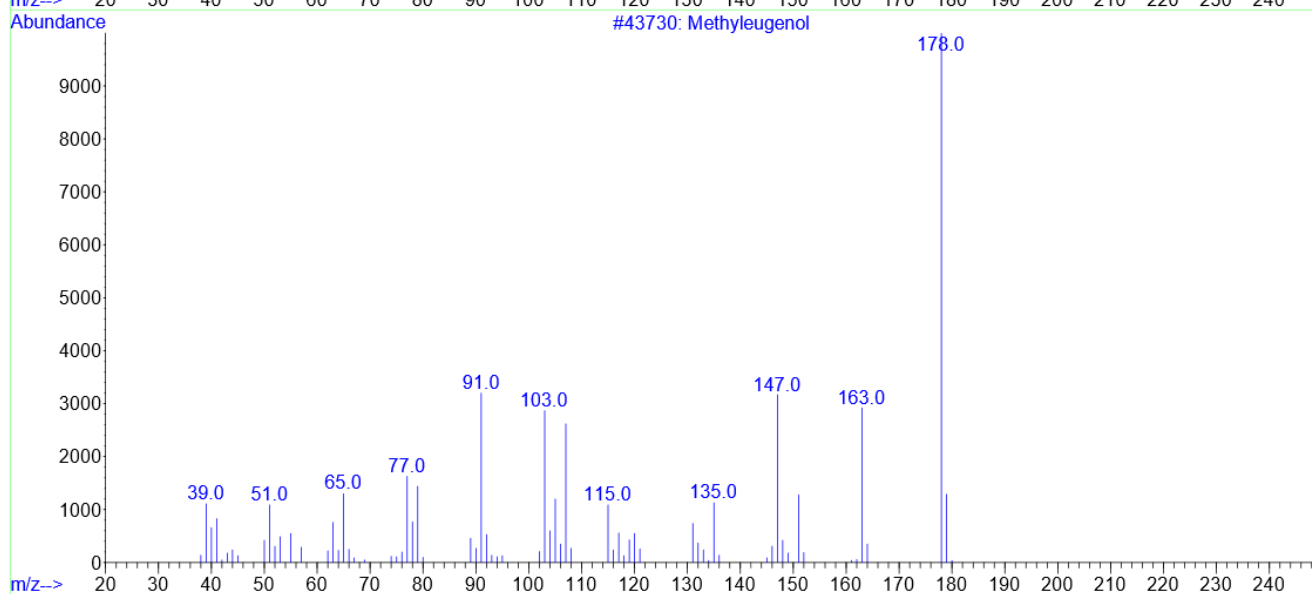

## 113. Benzyl tiglate

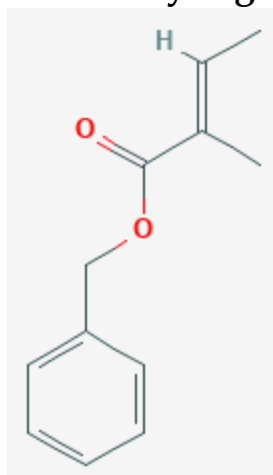

Library Searched : C:\Database\Adams.L

Quality : 64

ID : 28.71 Benzyl tiglate

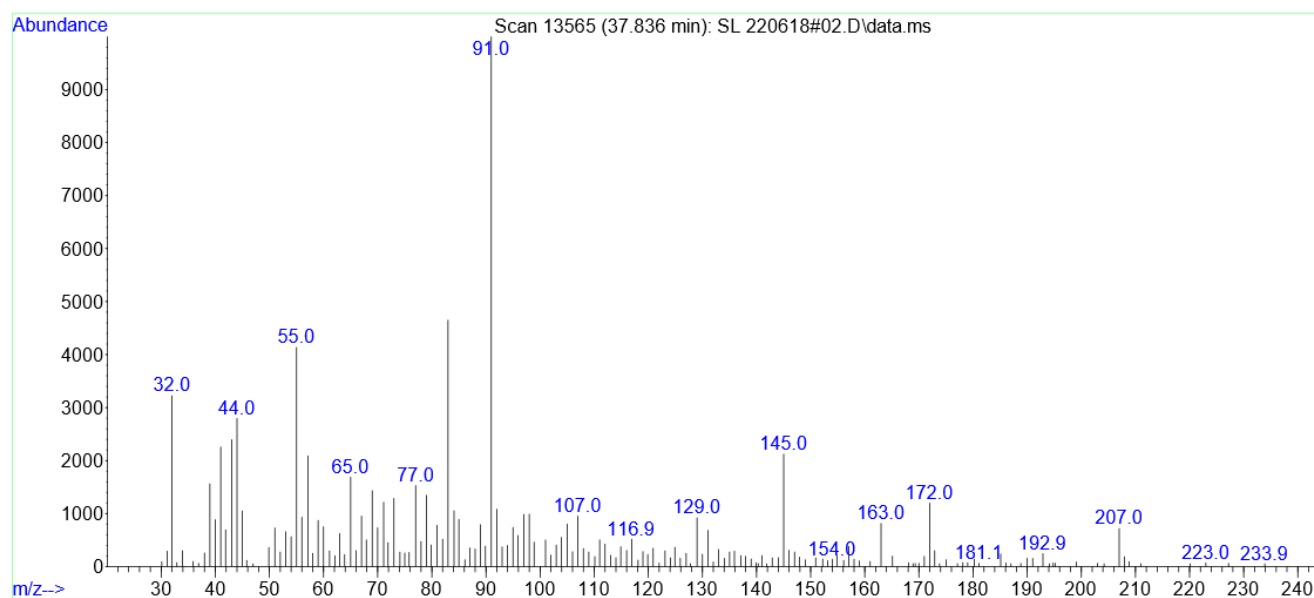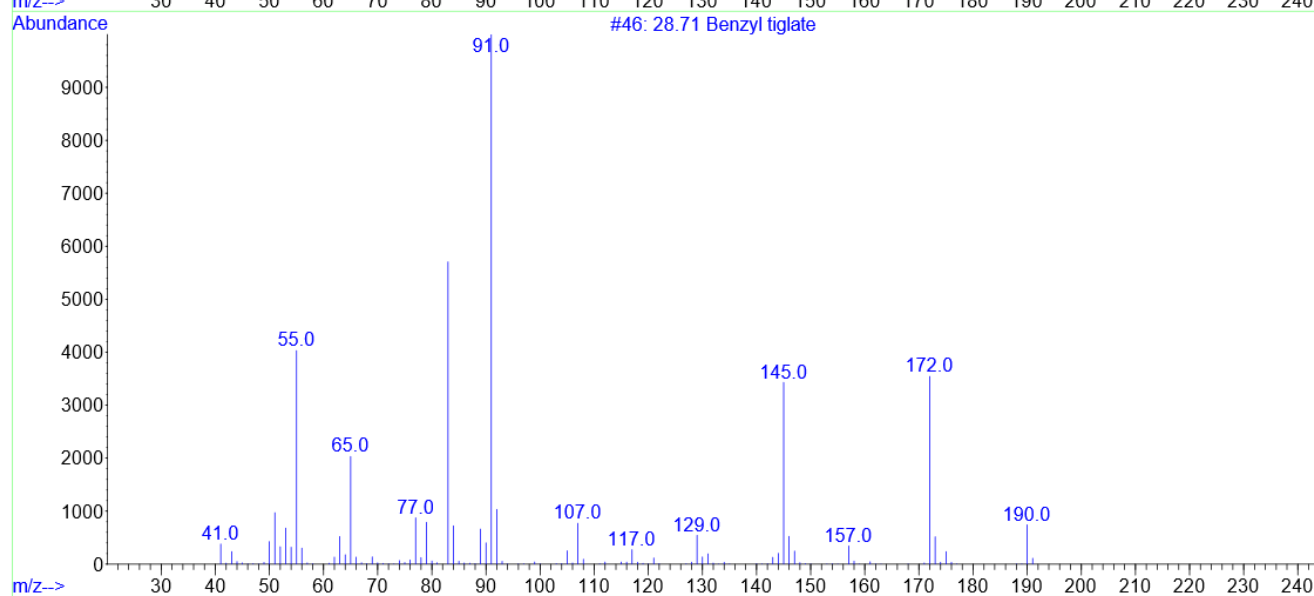

# GC-MS chromatograms

Horseradish

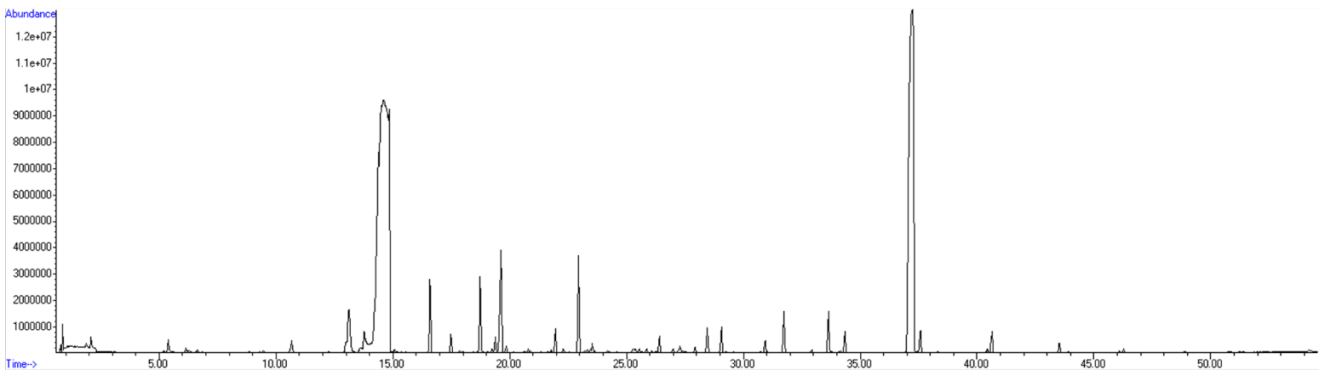

Rocket

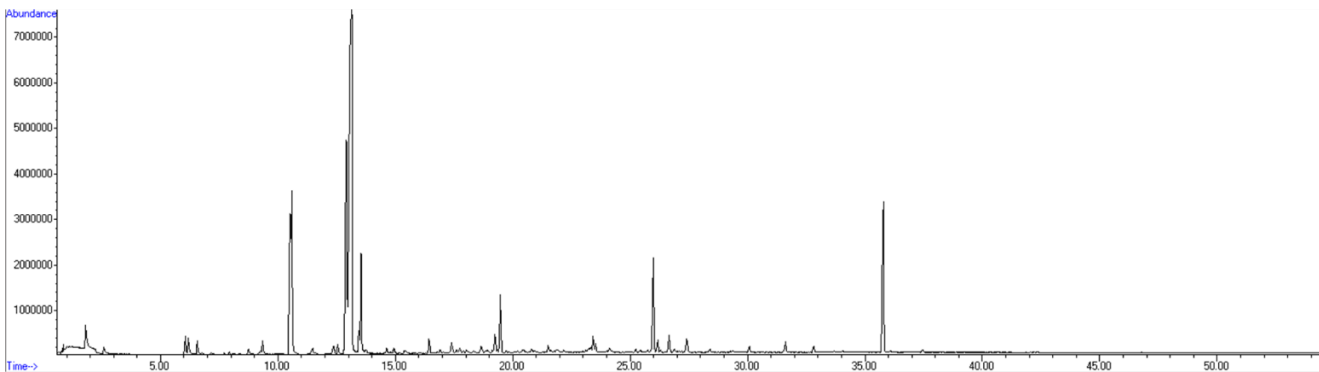

Wasabi

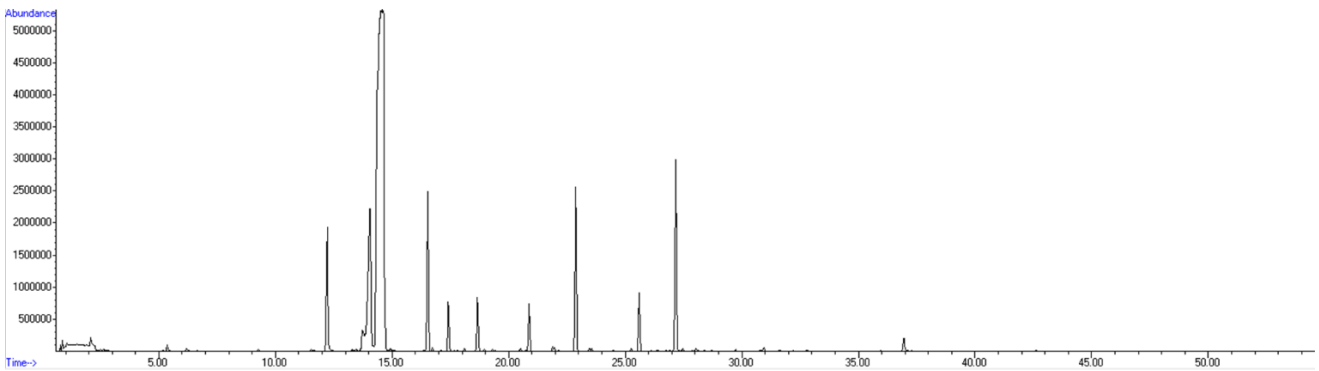

Watercress

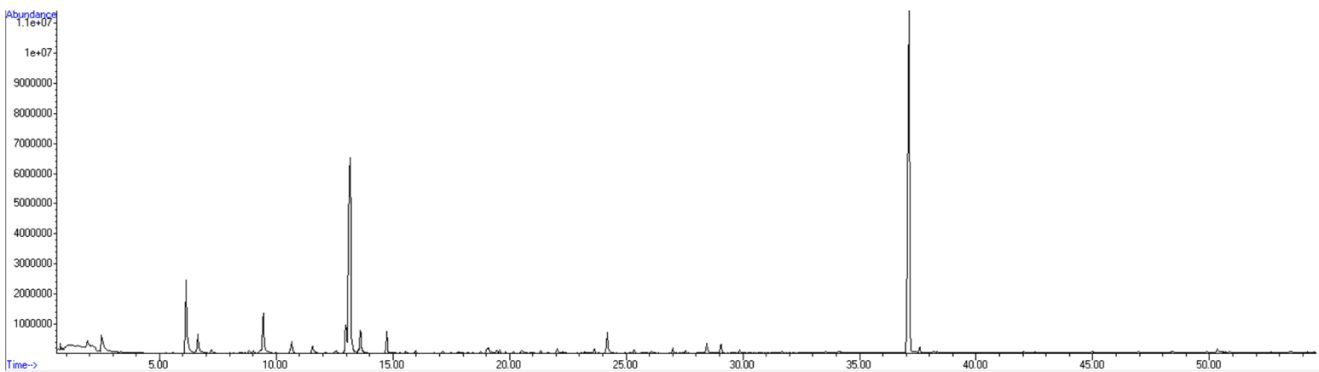



**Supplementary data S2. Total Ion Chromatograms (TICs) of glucosinolates identified by UPLC-MS/MS.**

**Glucoiberin**

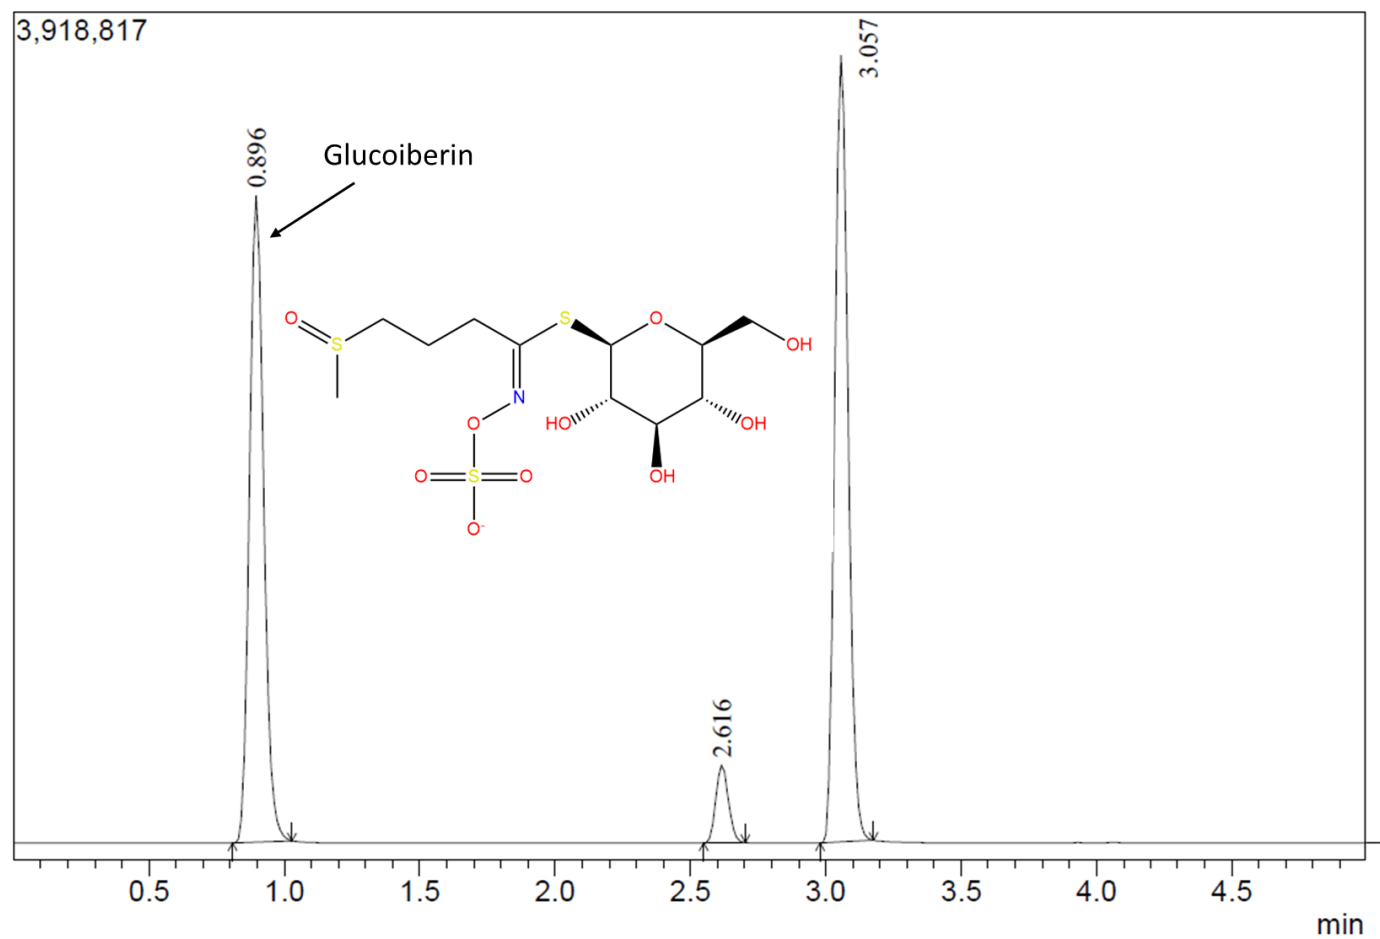

Pentyl GSL

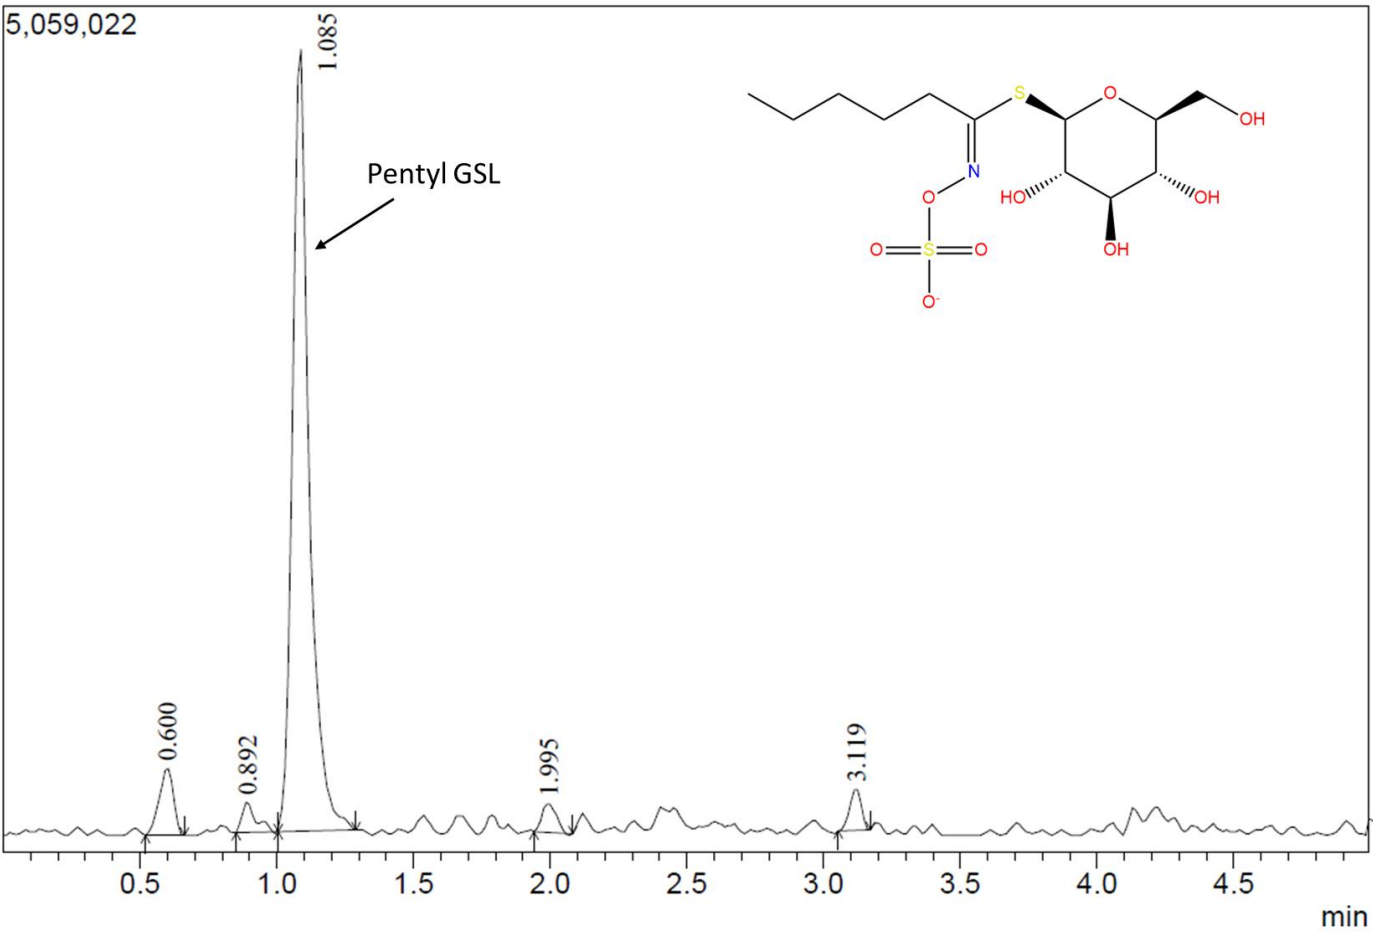

Progoitrin

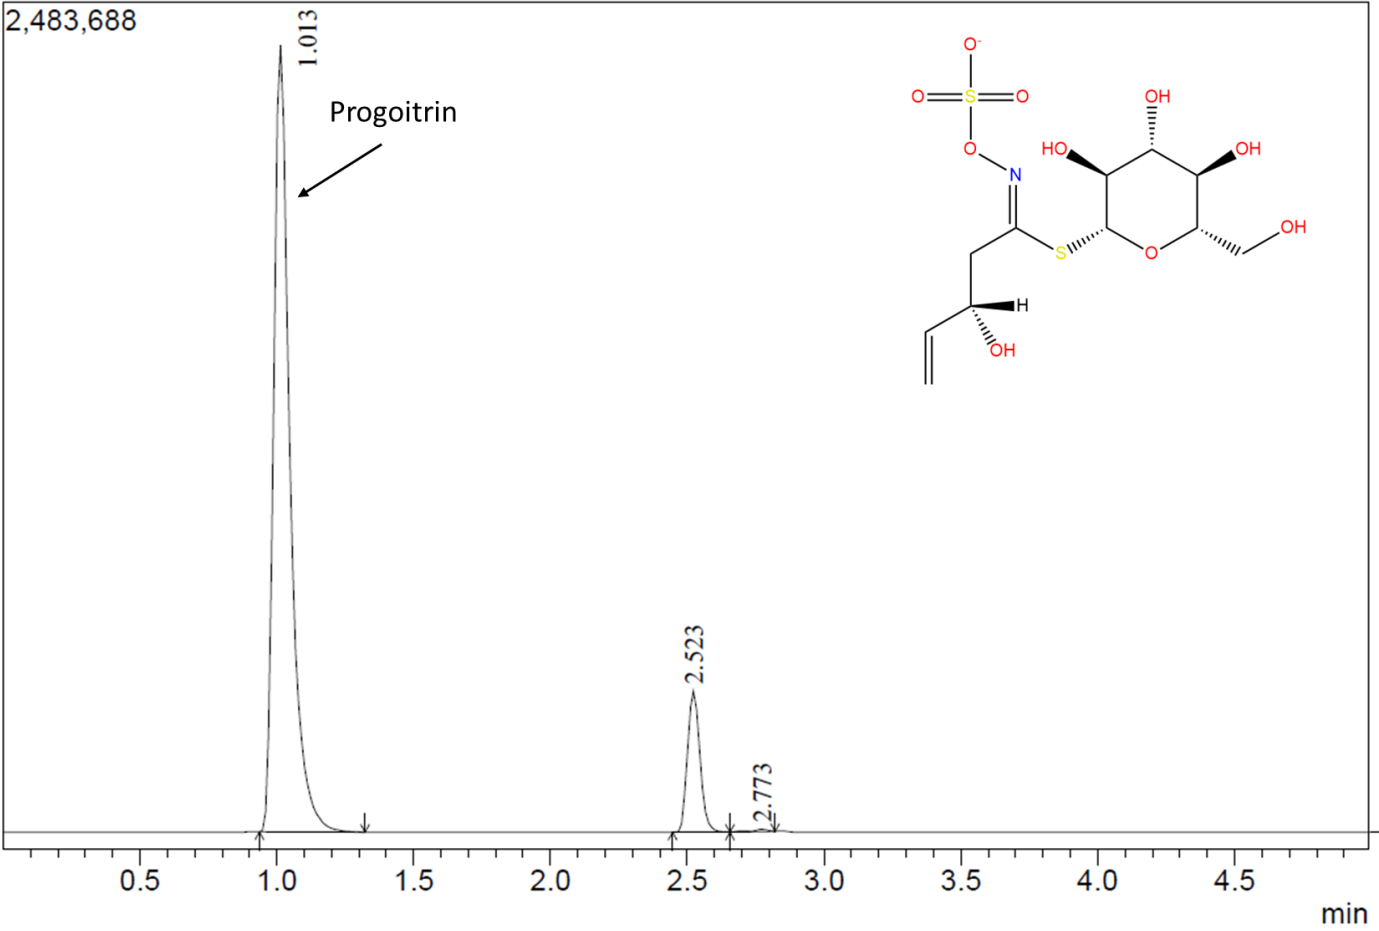

# Sinigrin

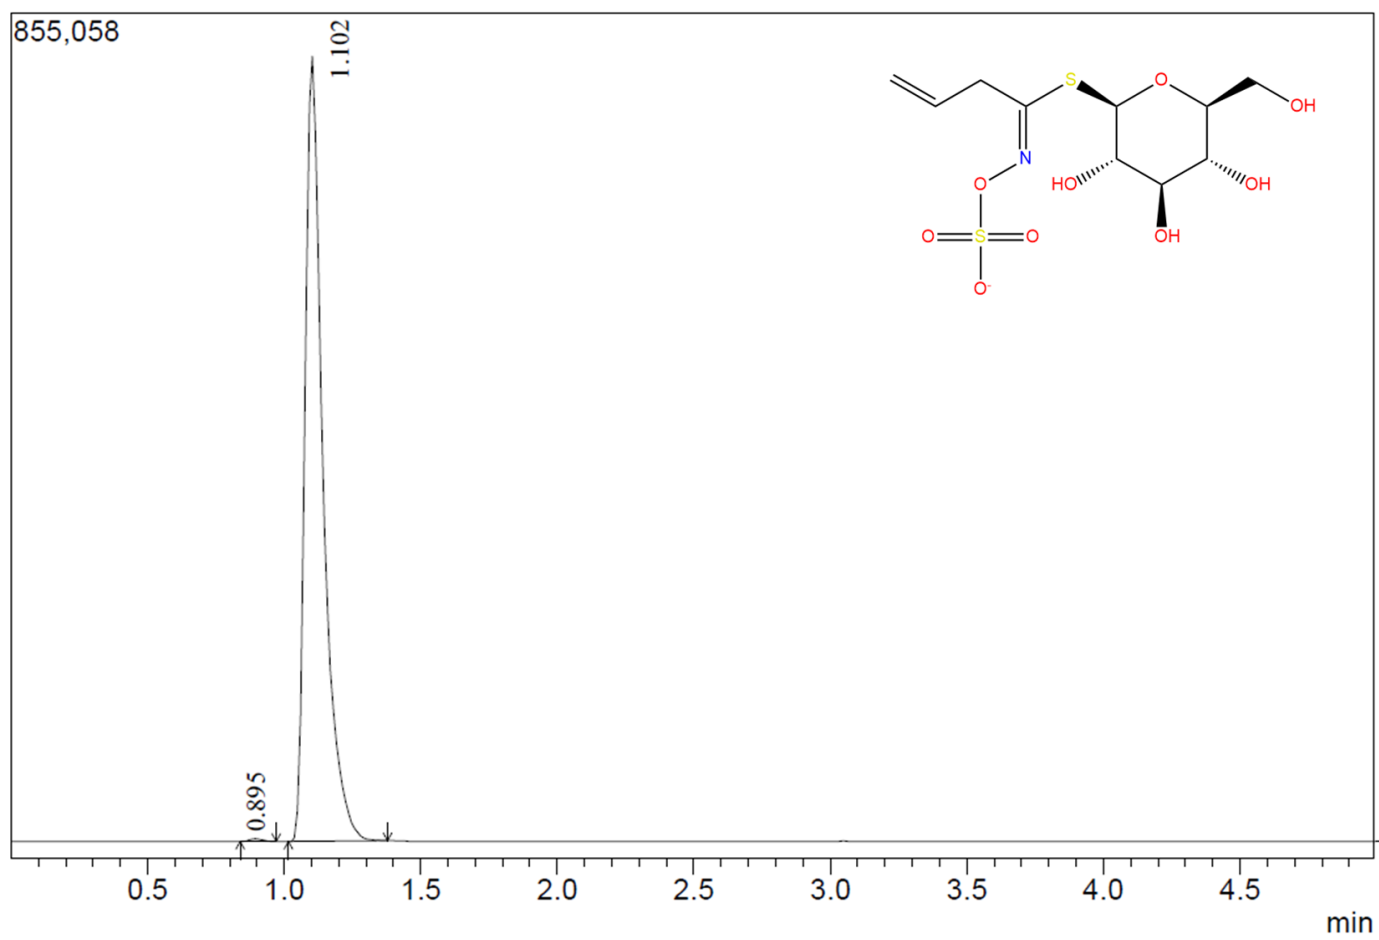

# Isobutyl GSL

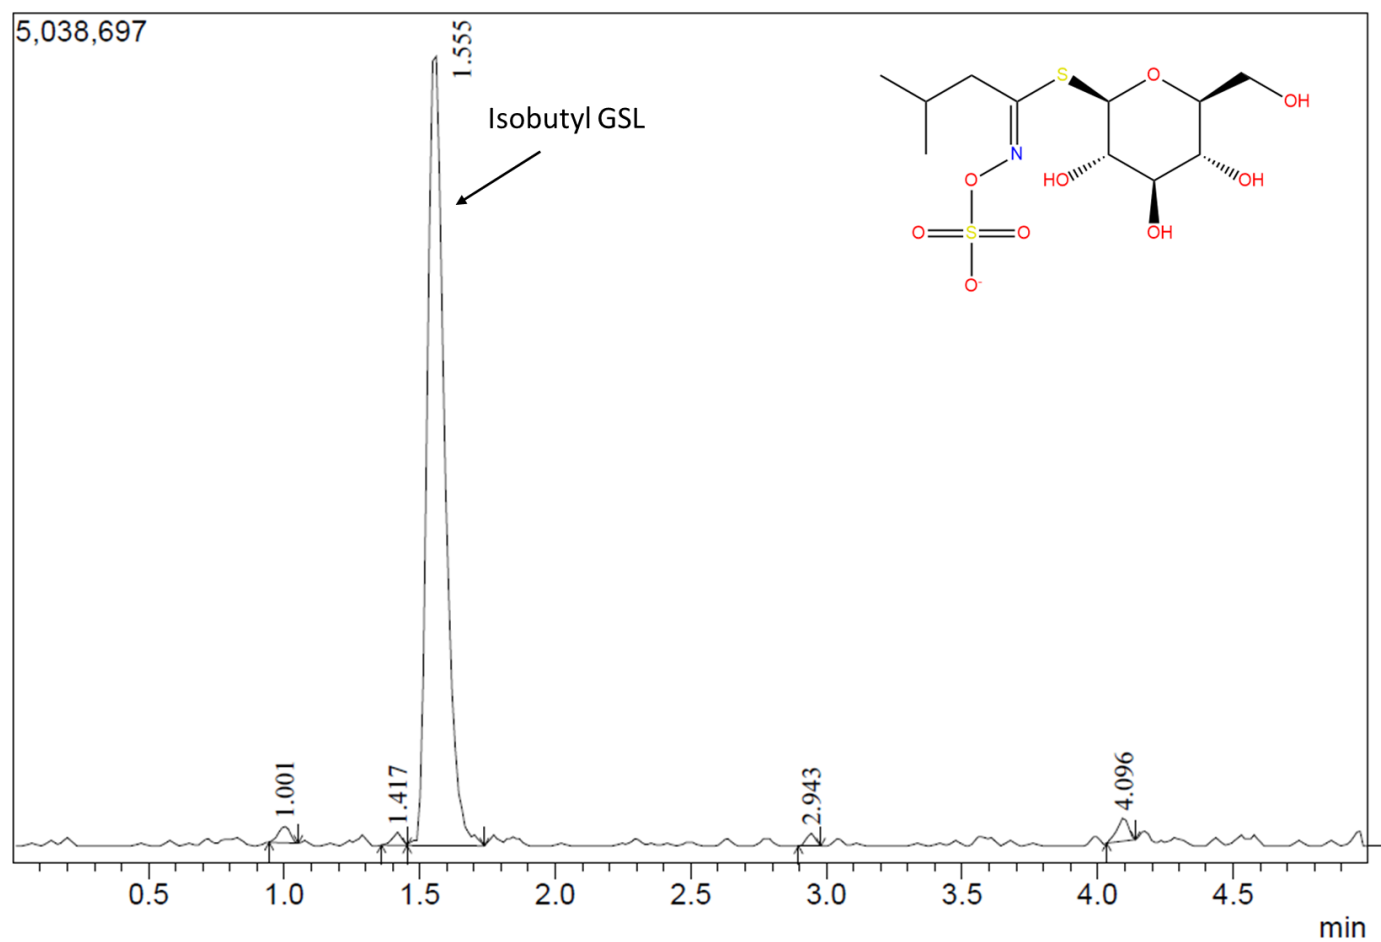

# Glucoraphanin

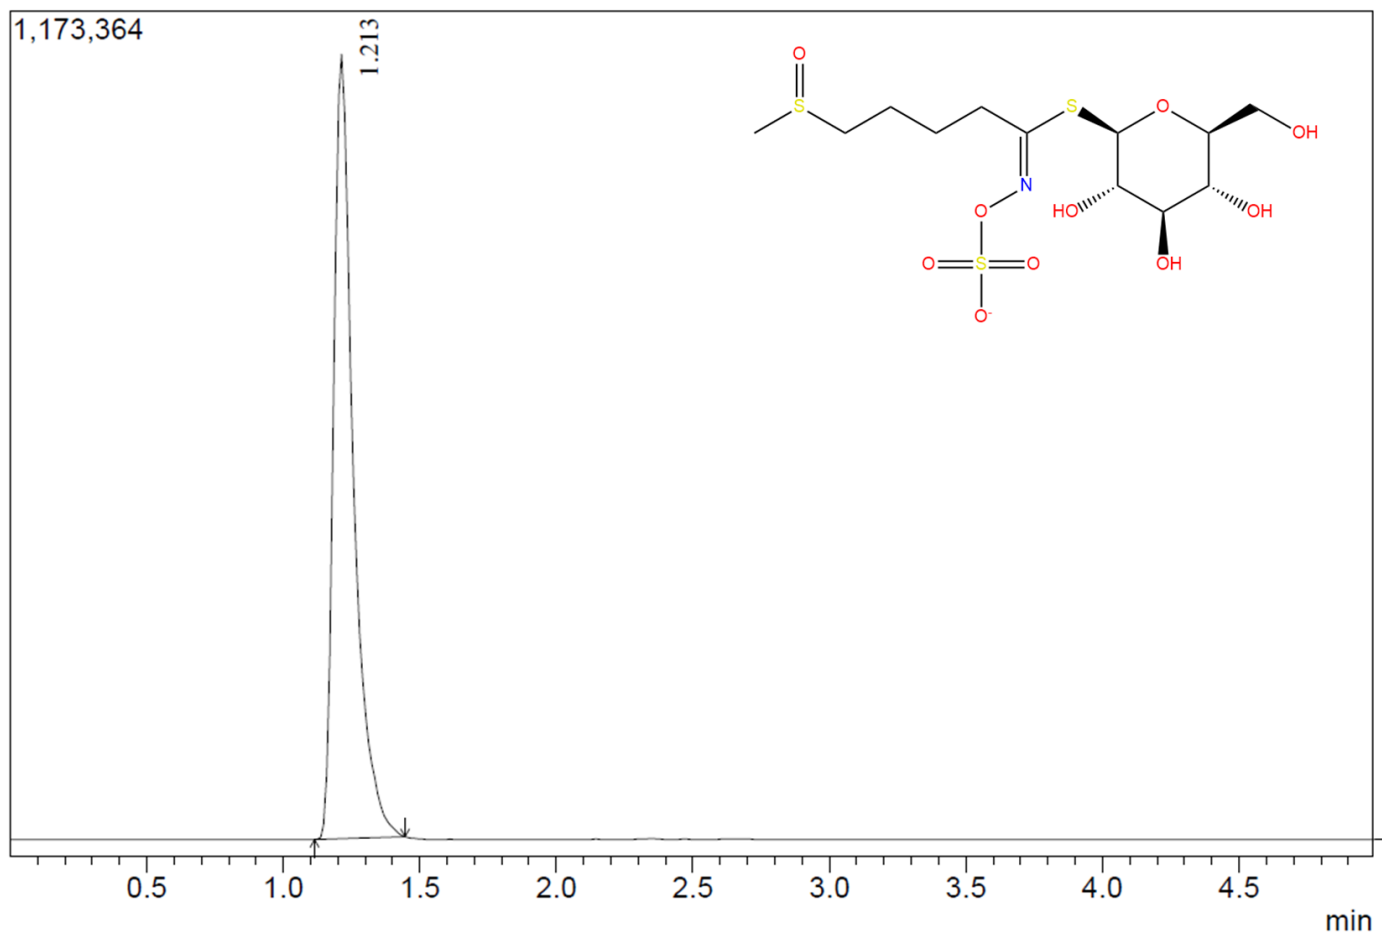

# Glucorucolamine

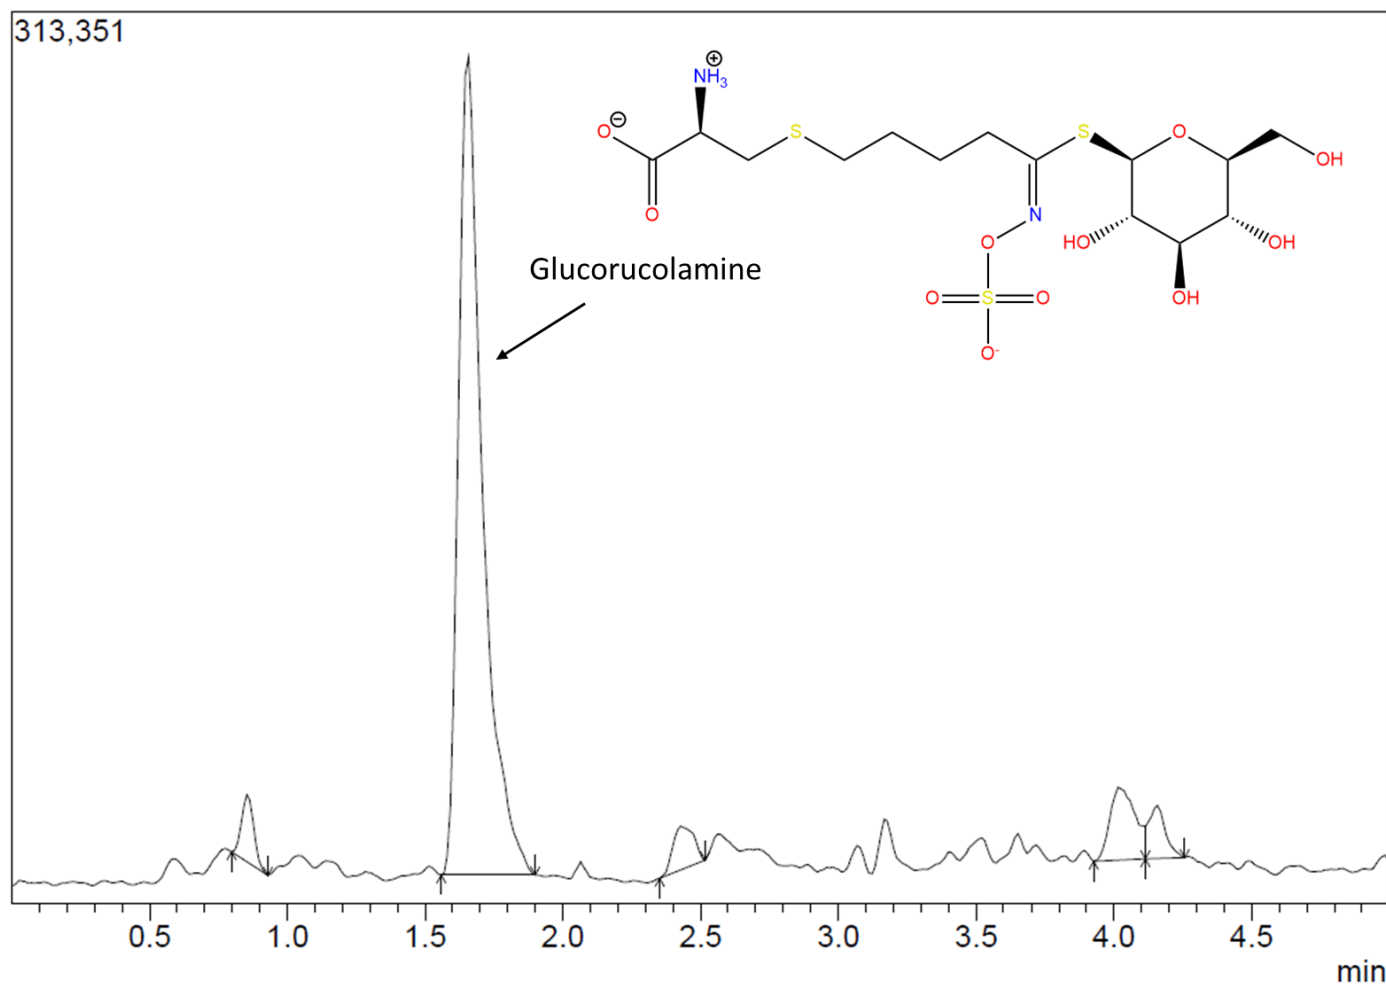

# Glucoalyssin

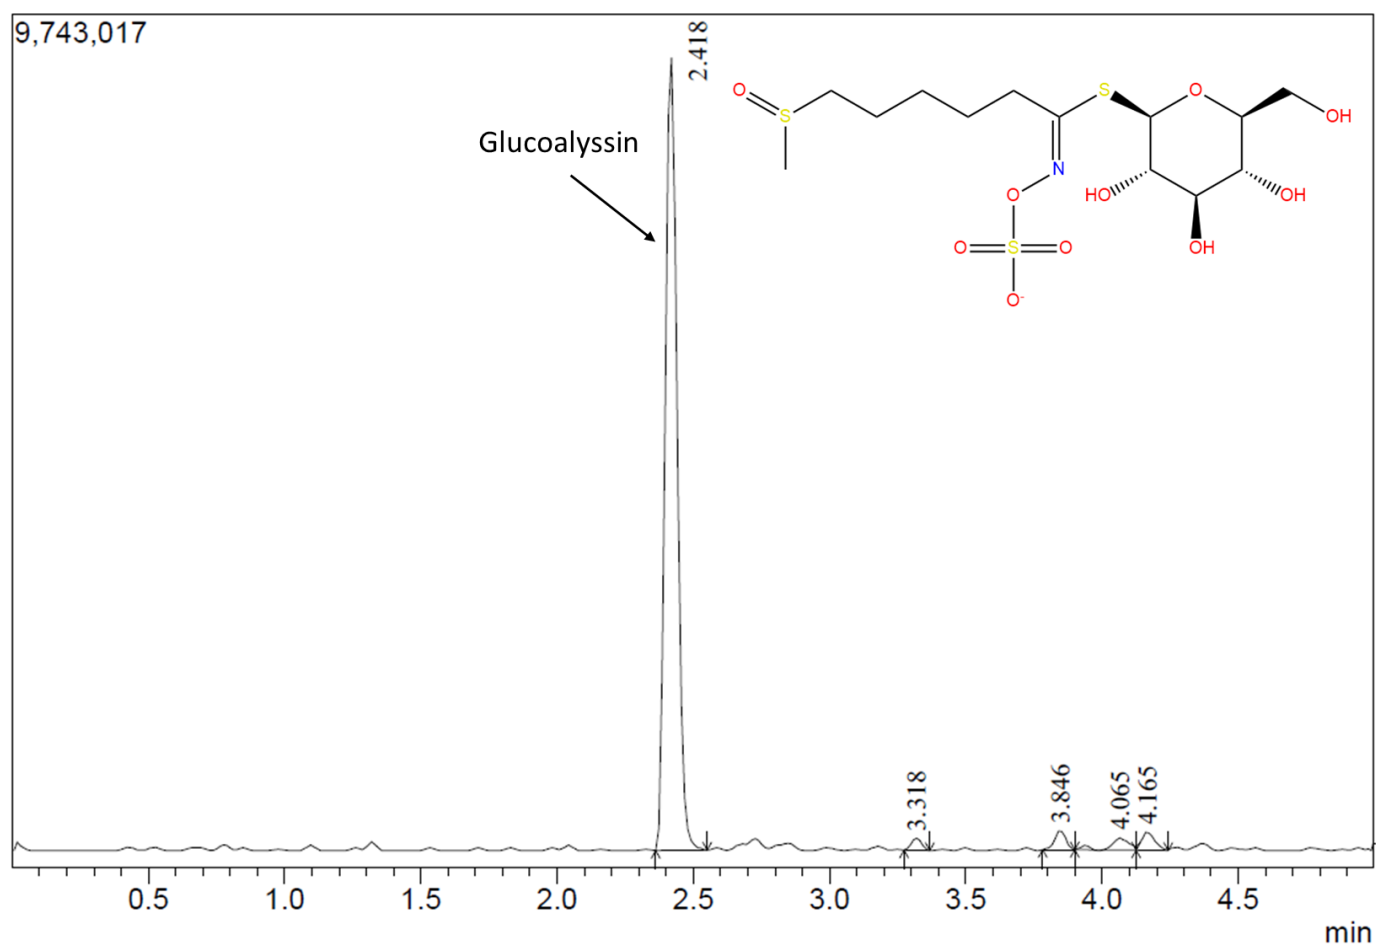



# Glucoputranjivin

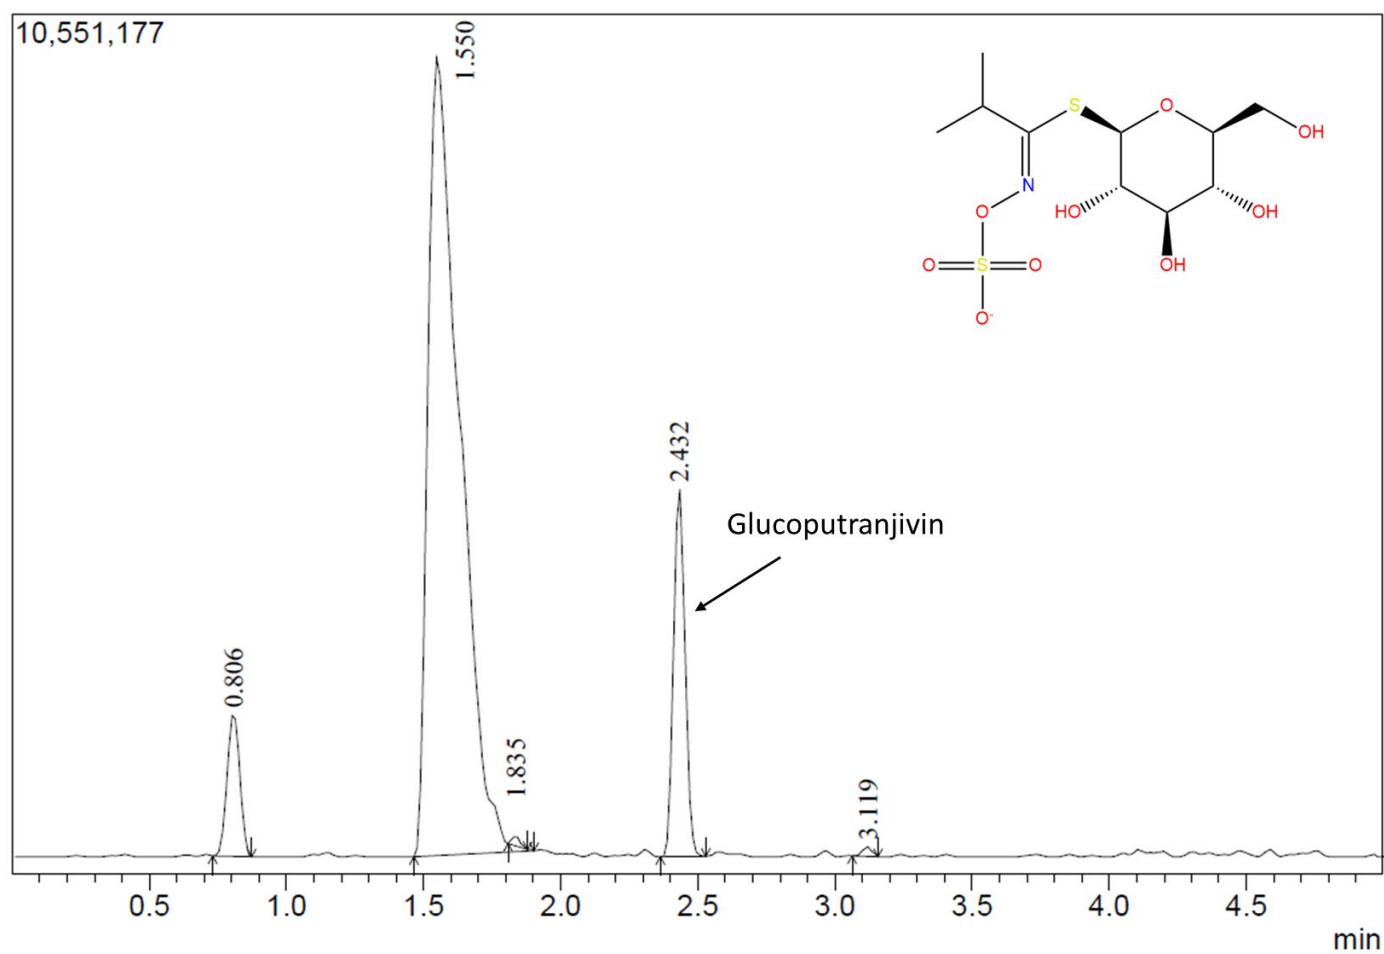

# Gluconapin

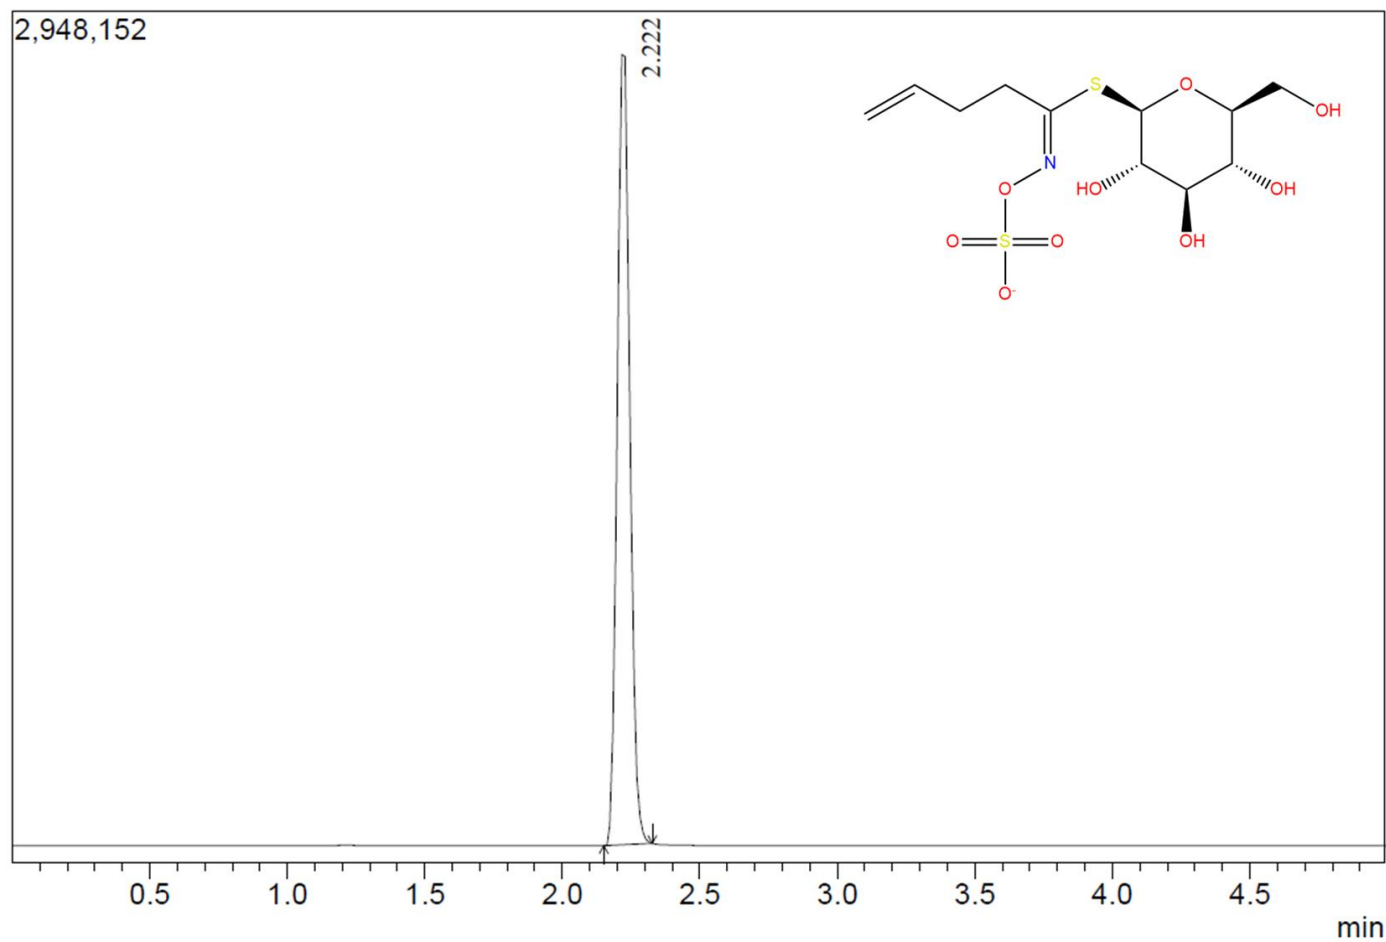

# Diglucothiobeinin

6,267,180

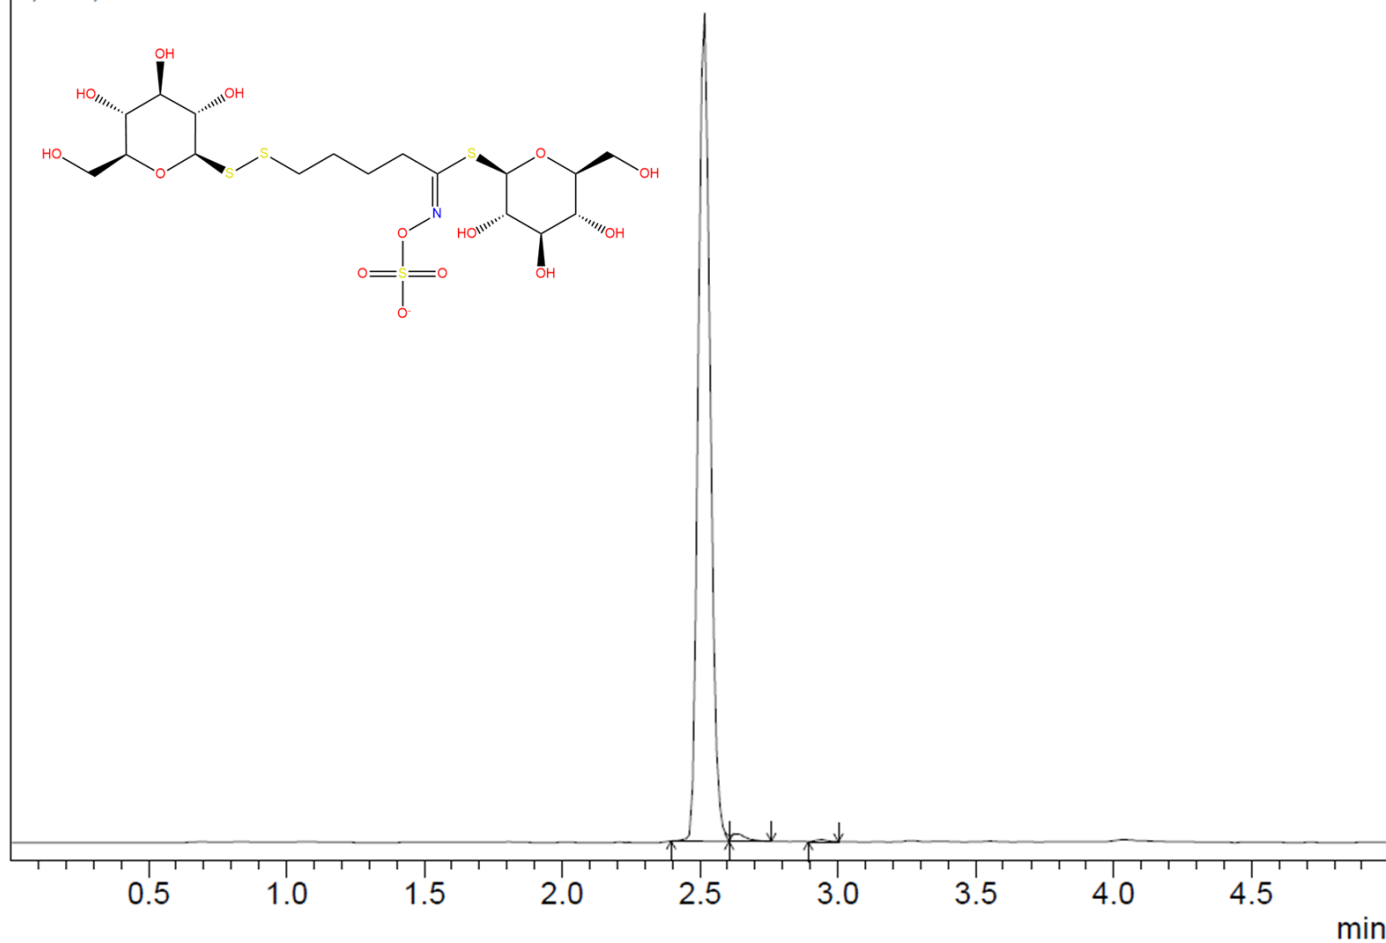

# Glucoberberoin

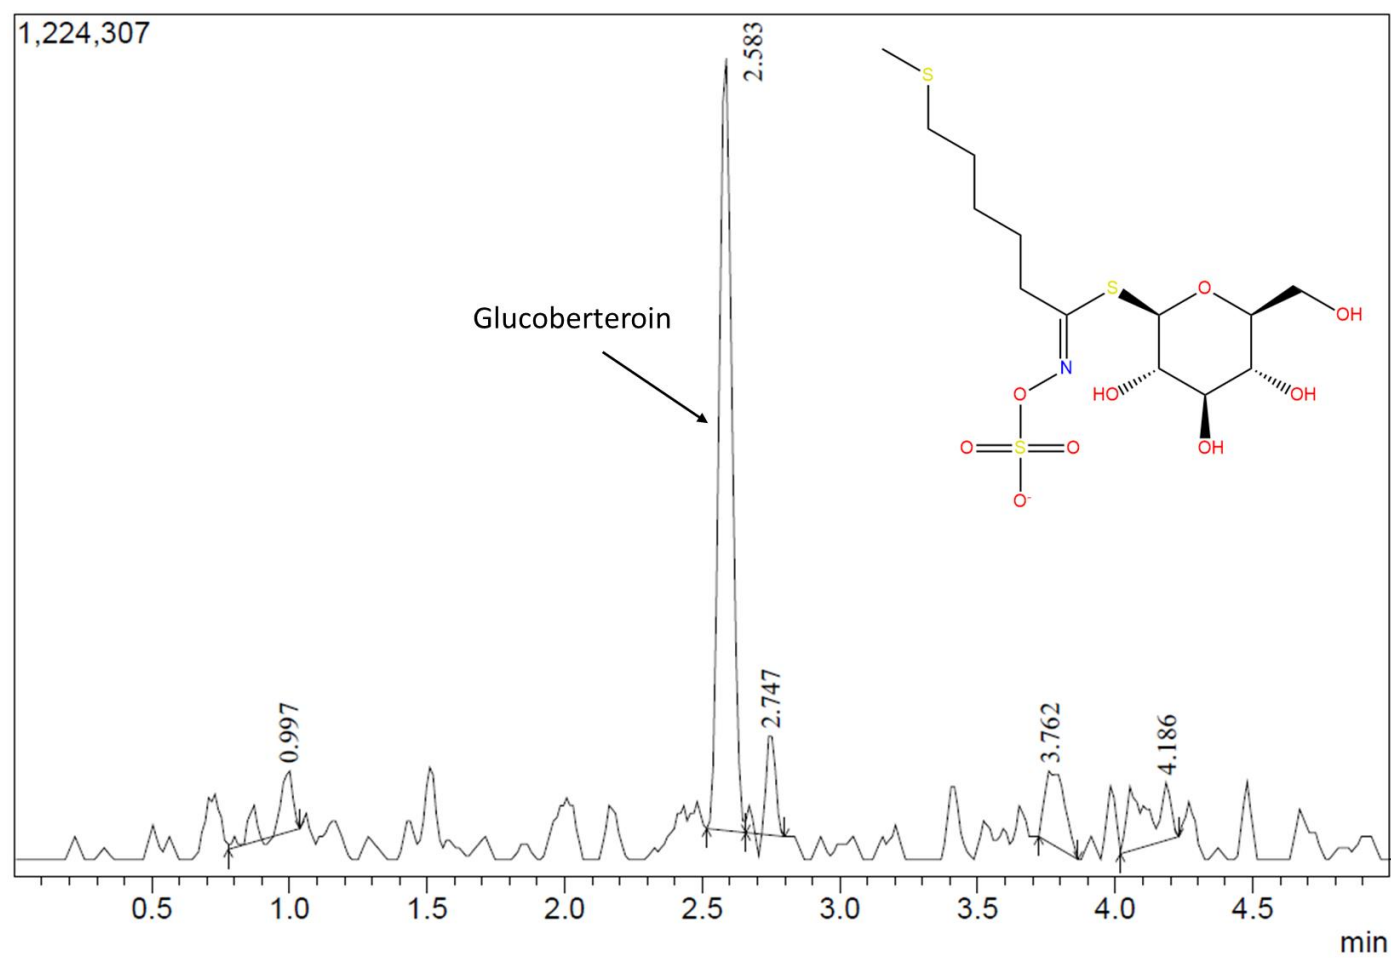

4-hydroxyglucobrassicin

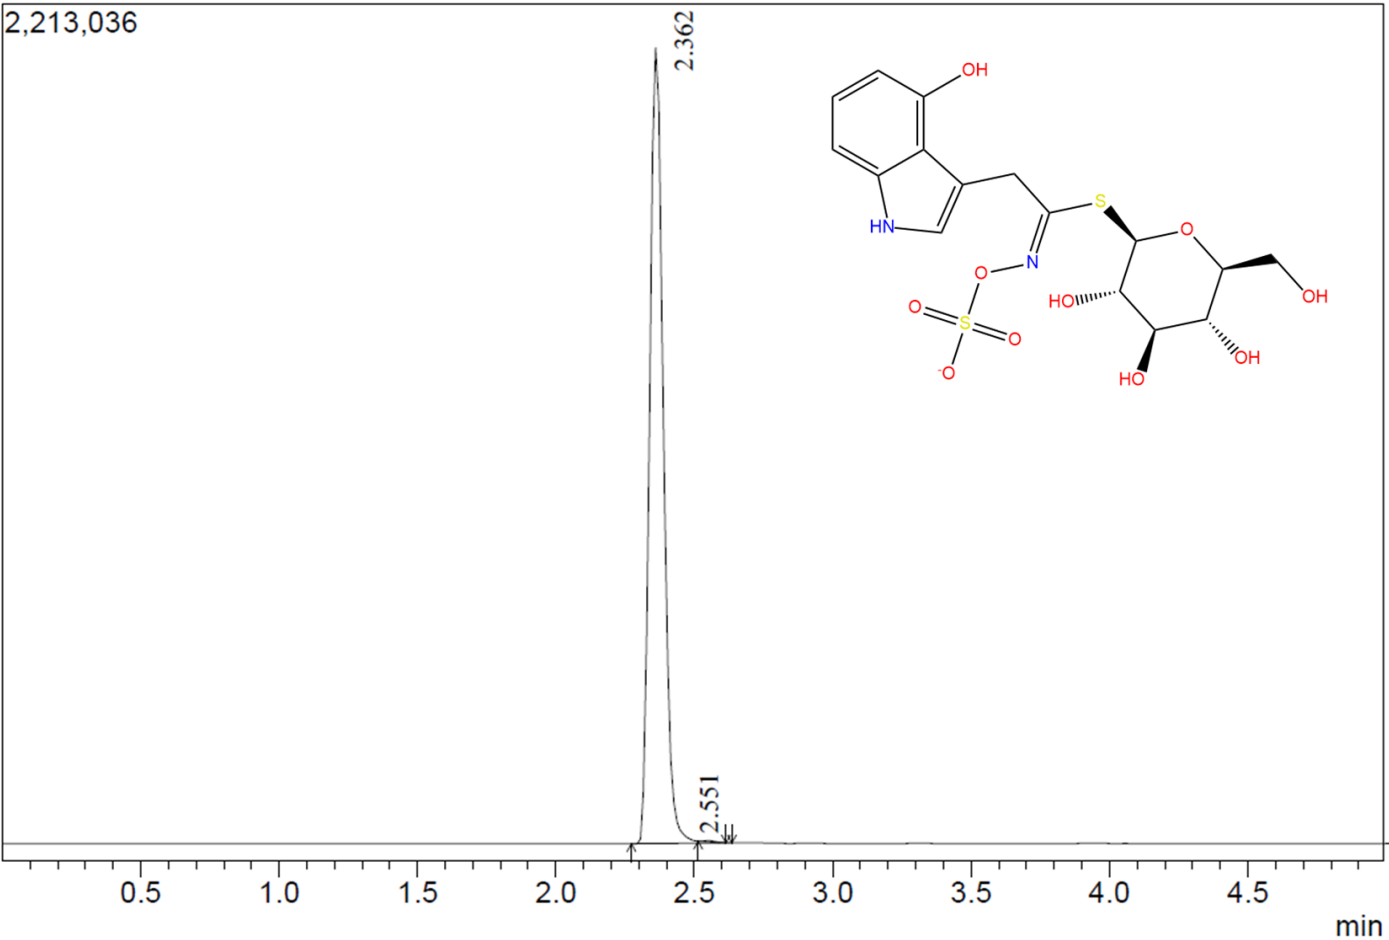

# Glucocochlearin

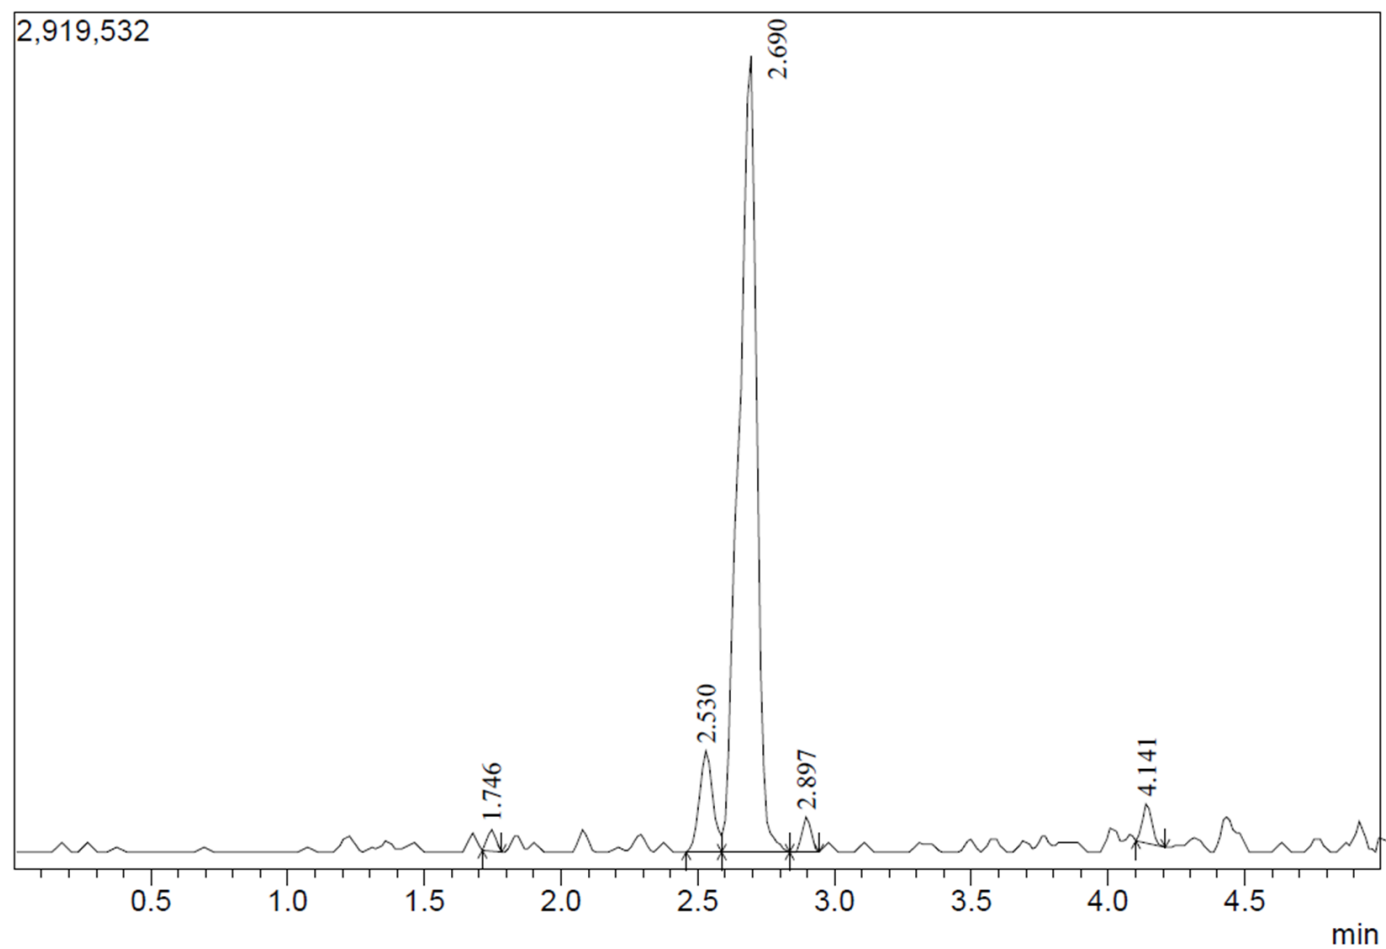

## Glucosativin & Dimeric 4-mercaptobutyl GSL

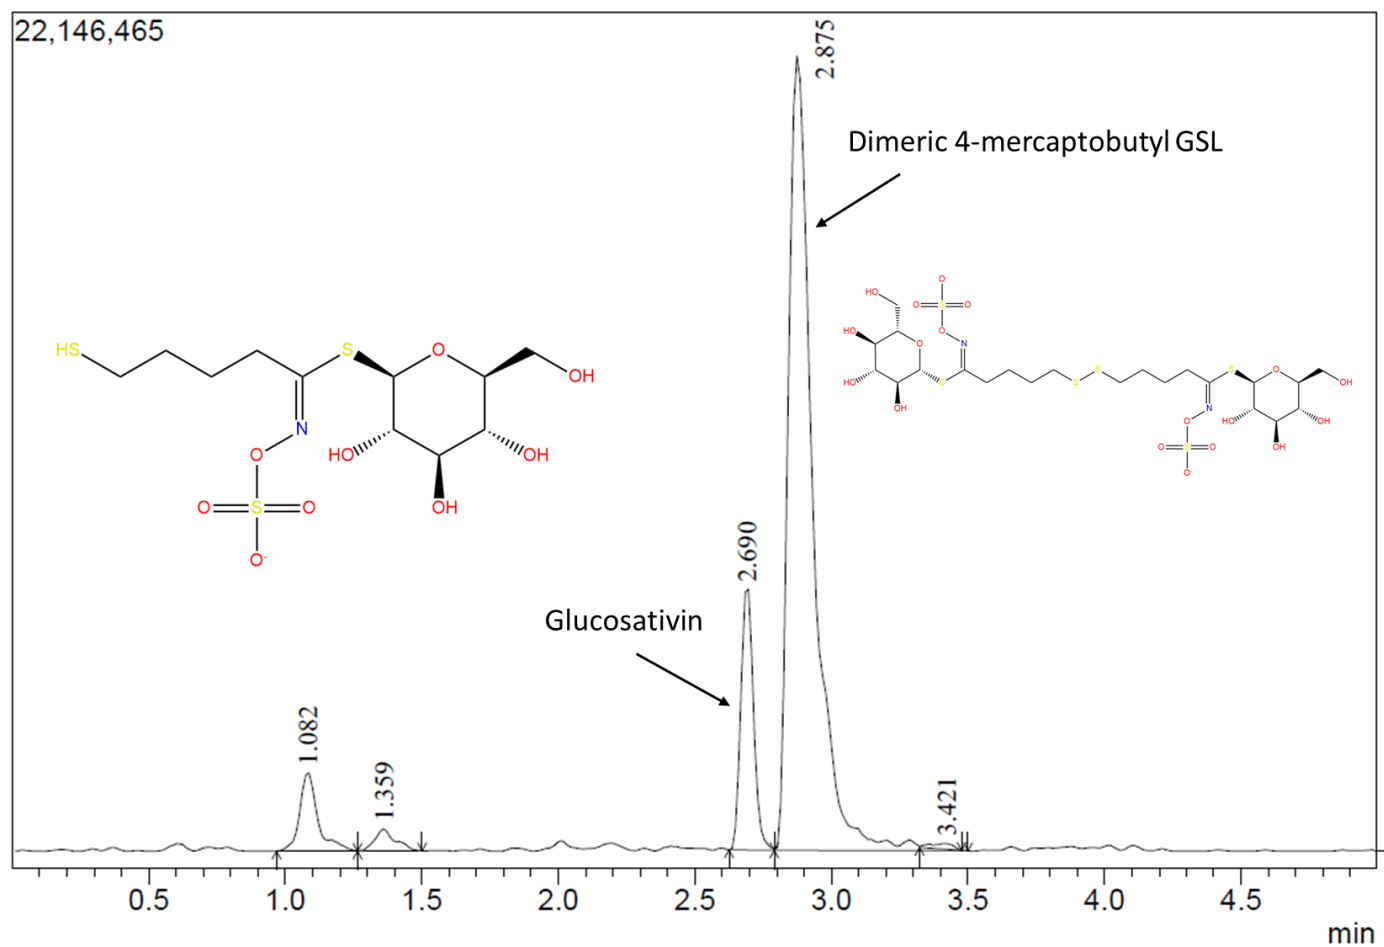

## 7-methylsulfinylheptyl GSL

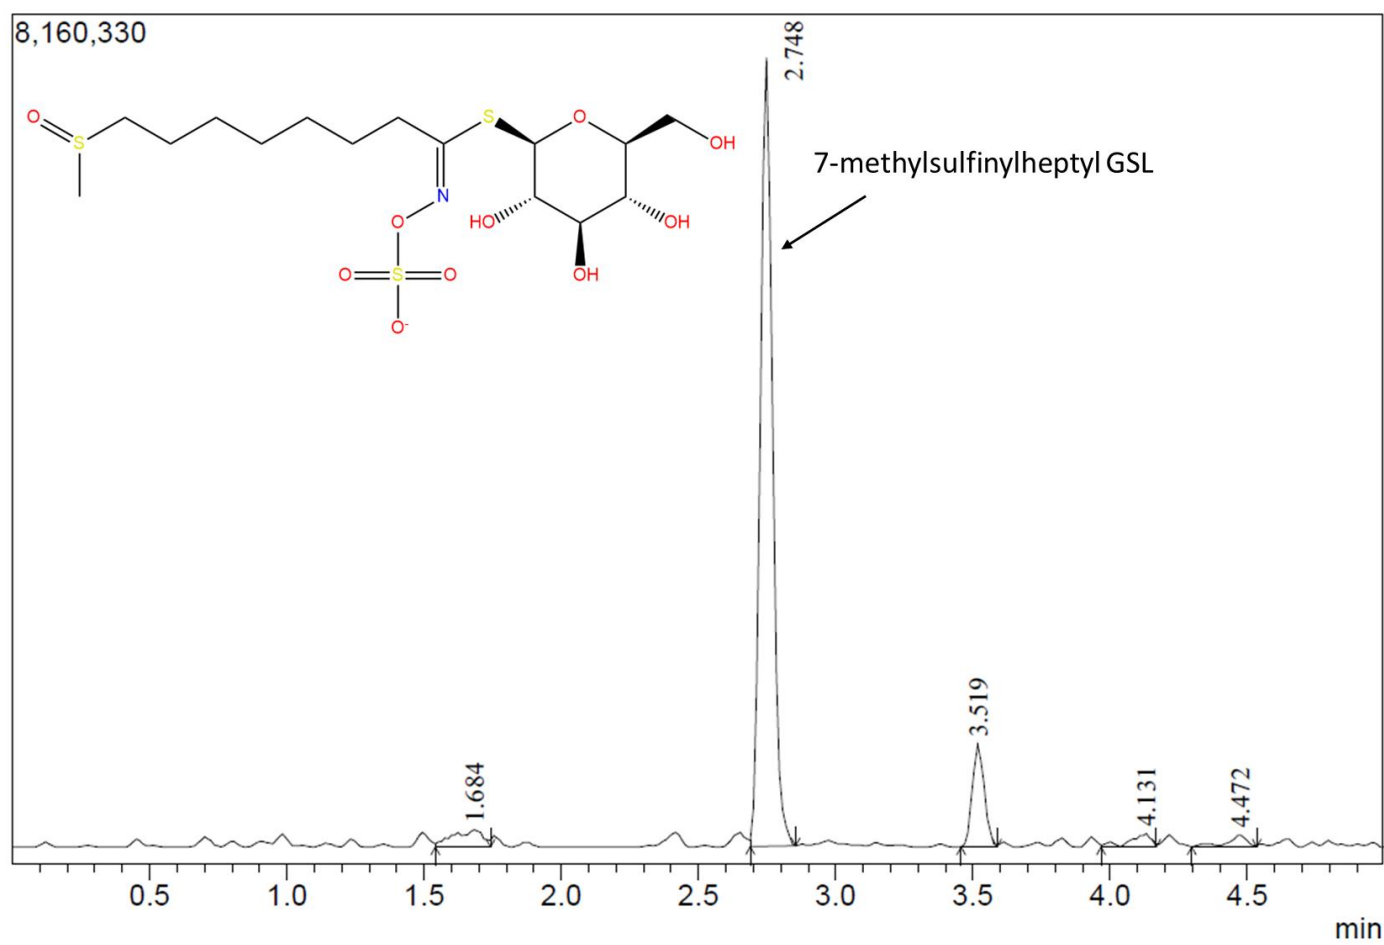



# Glucobrassicinapin

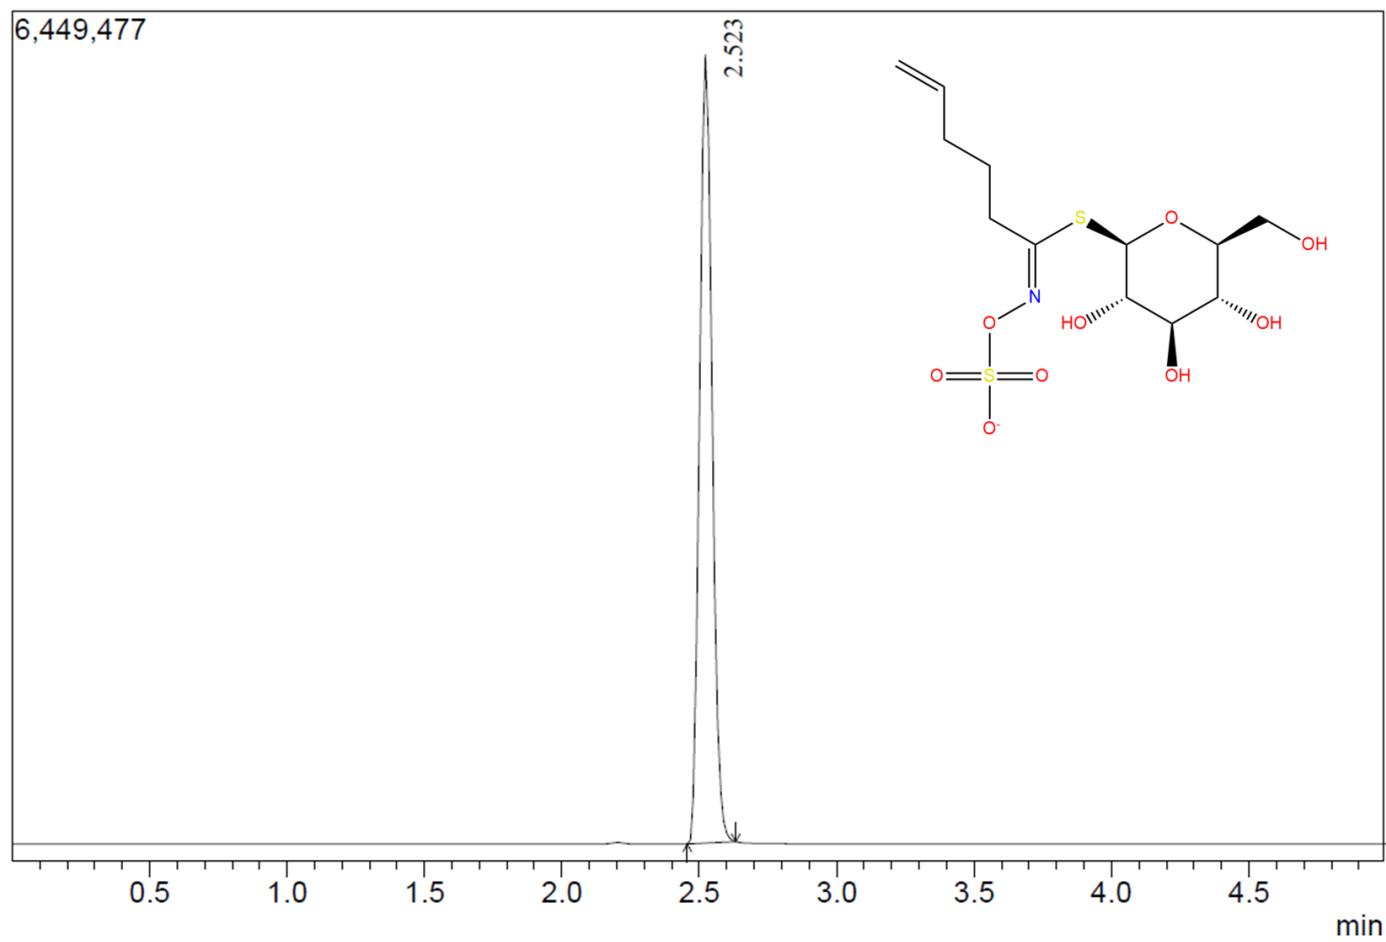

# Glucobarbarin

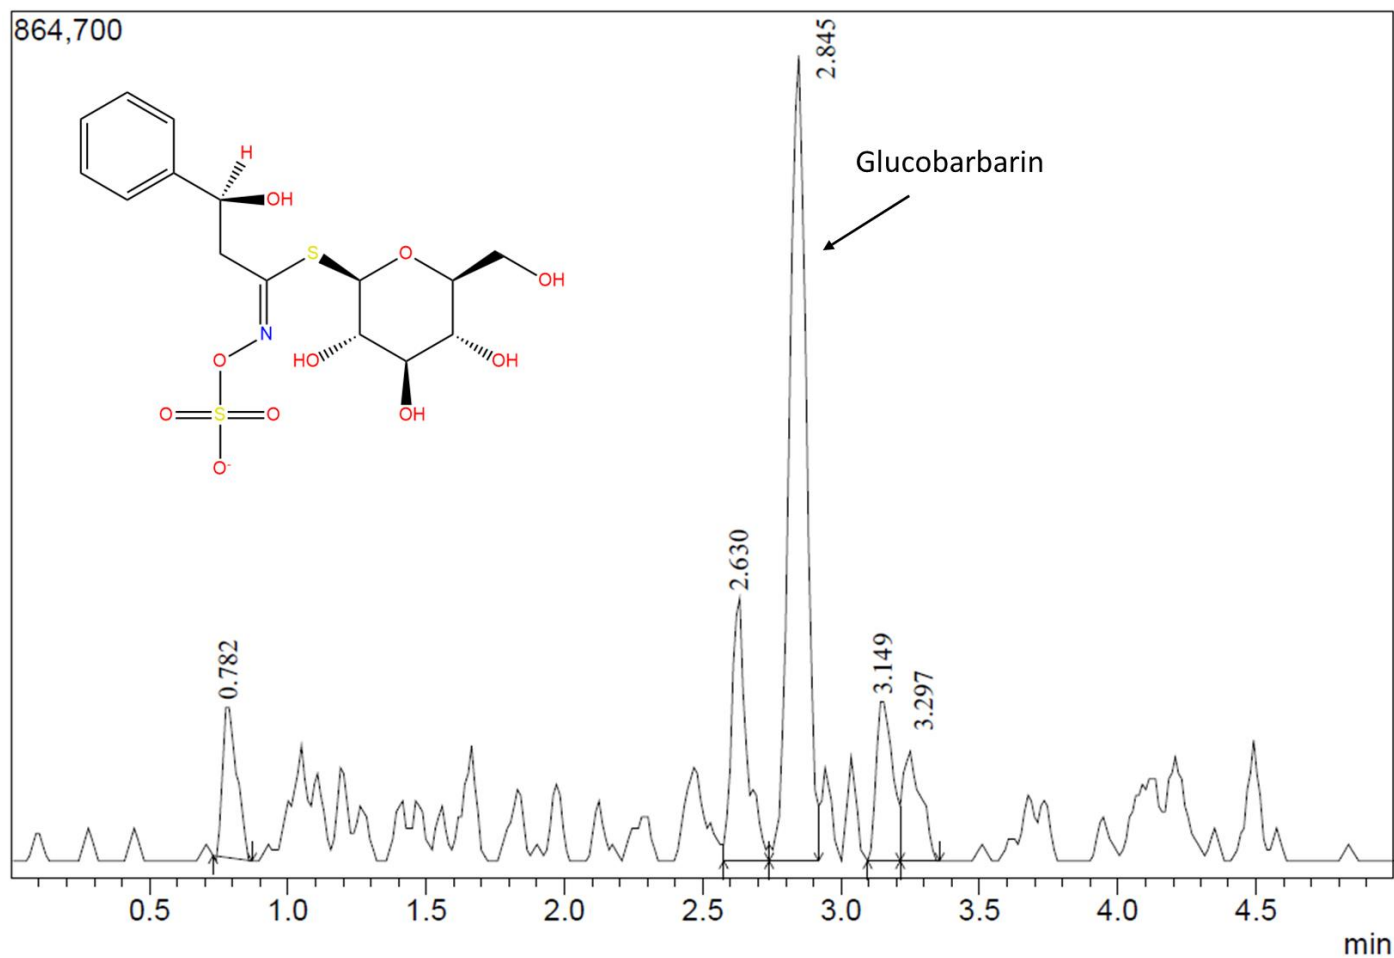

# Glucotropaeolin

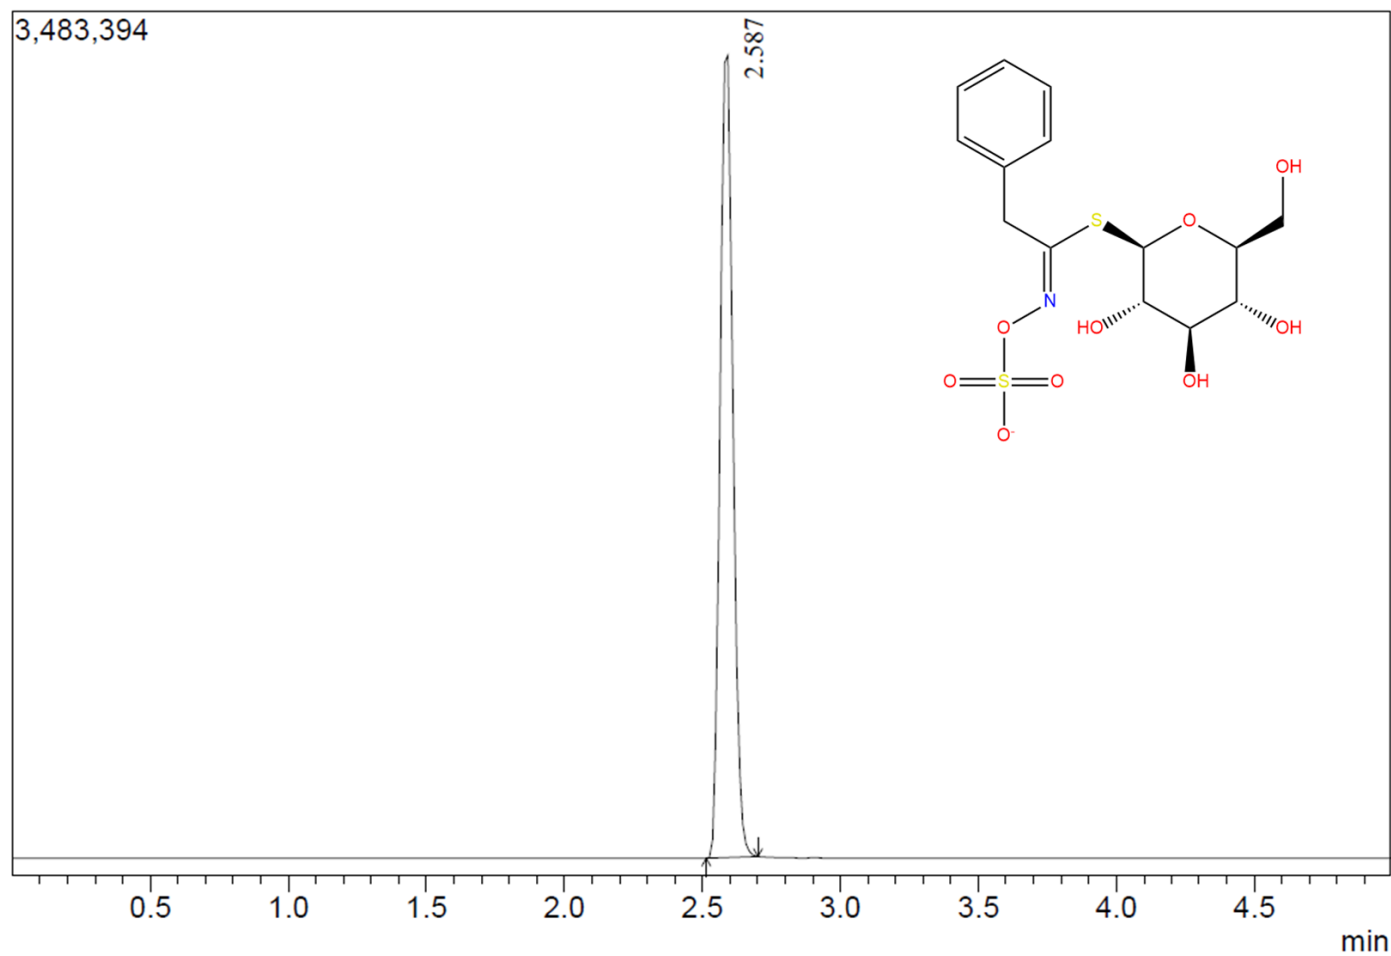

# Glucoerucin

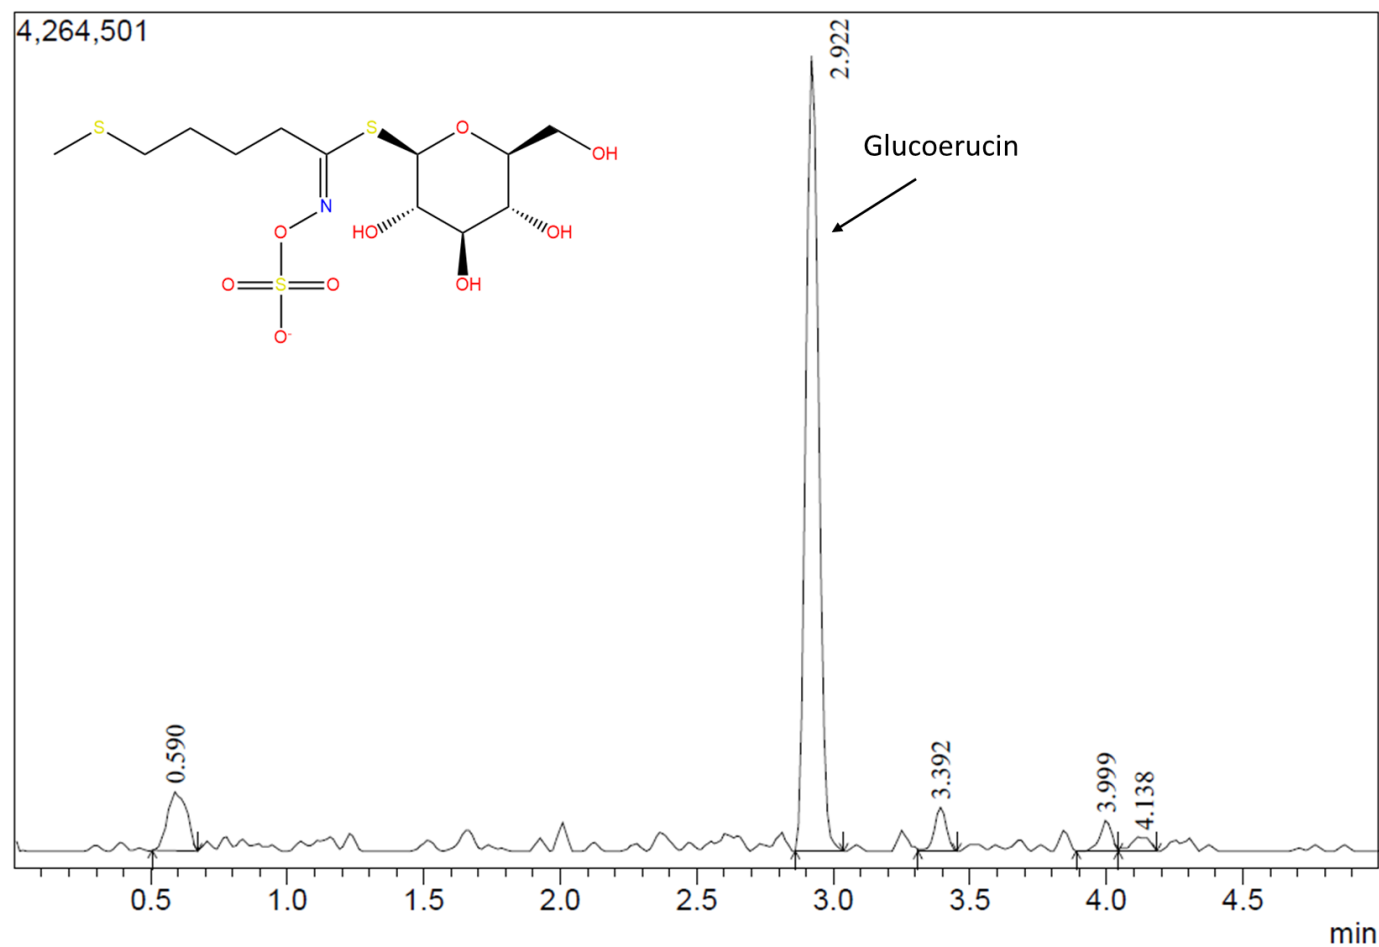

# Glucobrassicin

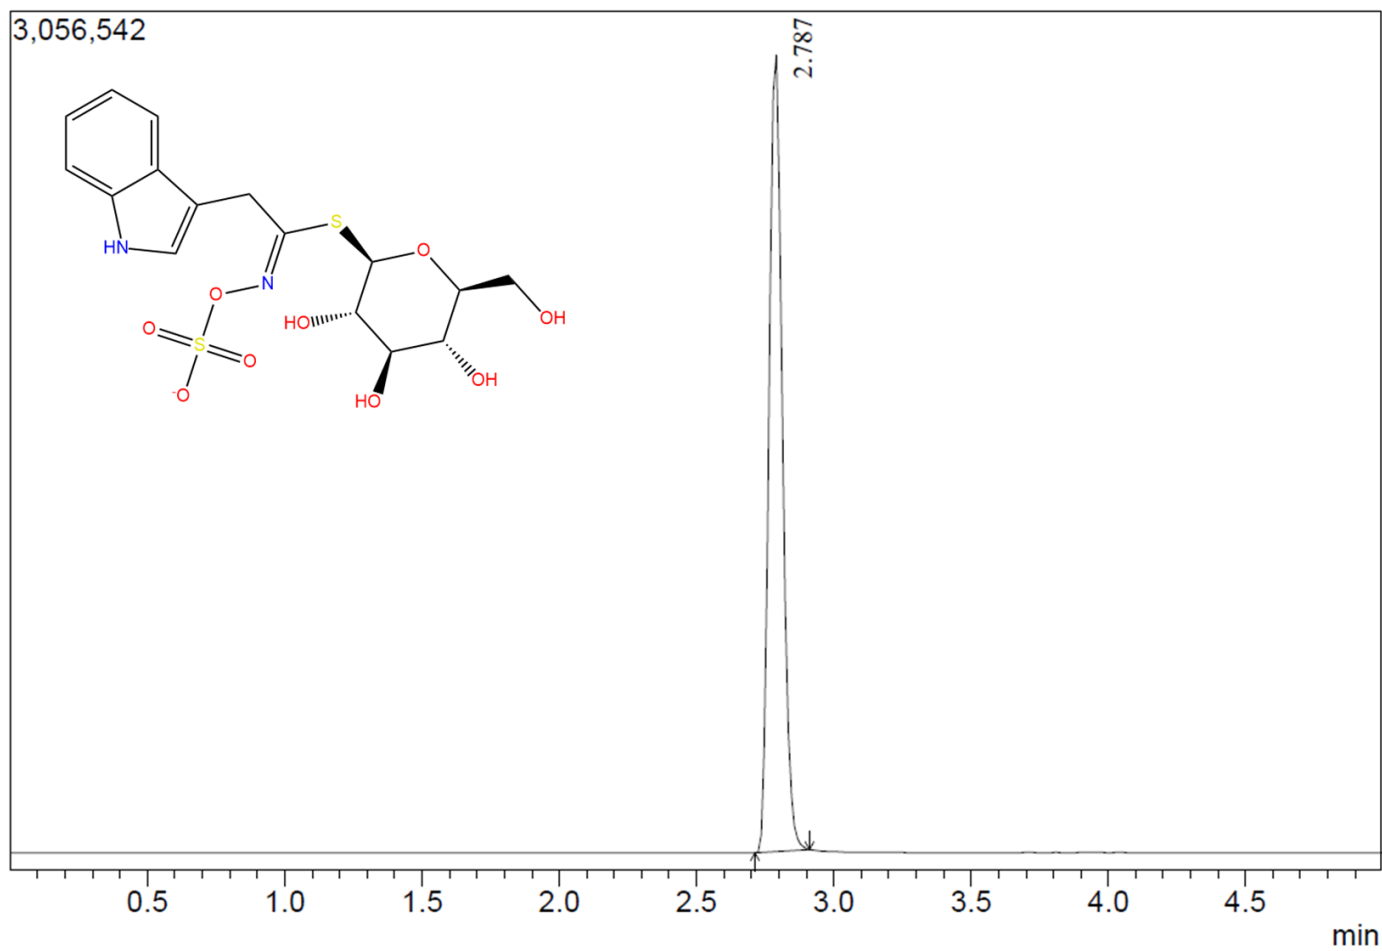

# 4-methoxyglucobrassicin

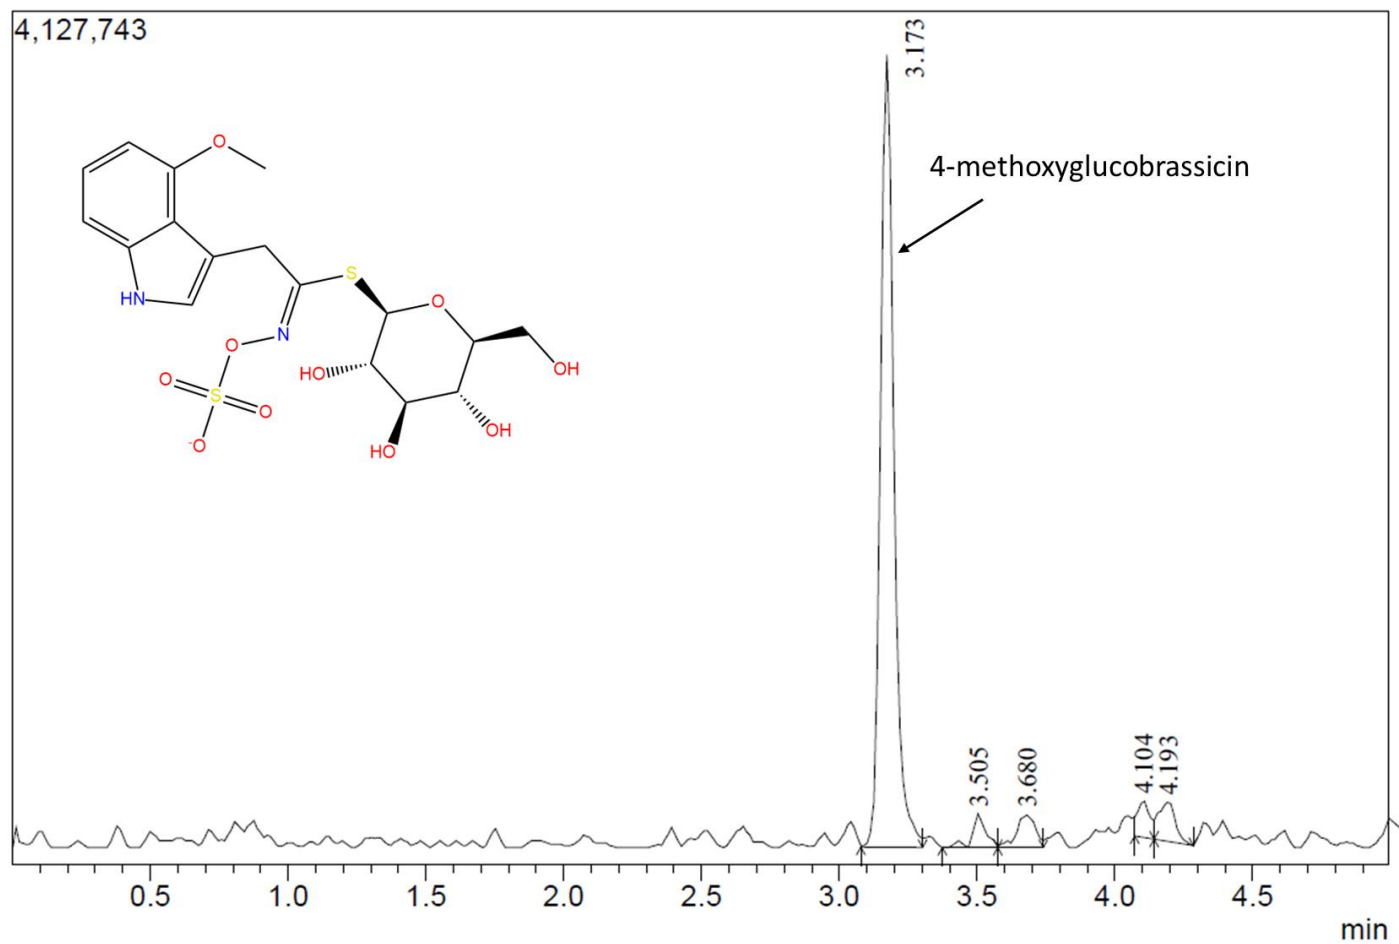

# Gluconasturtiin

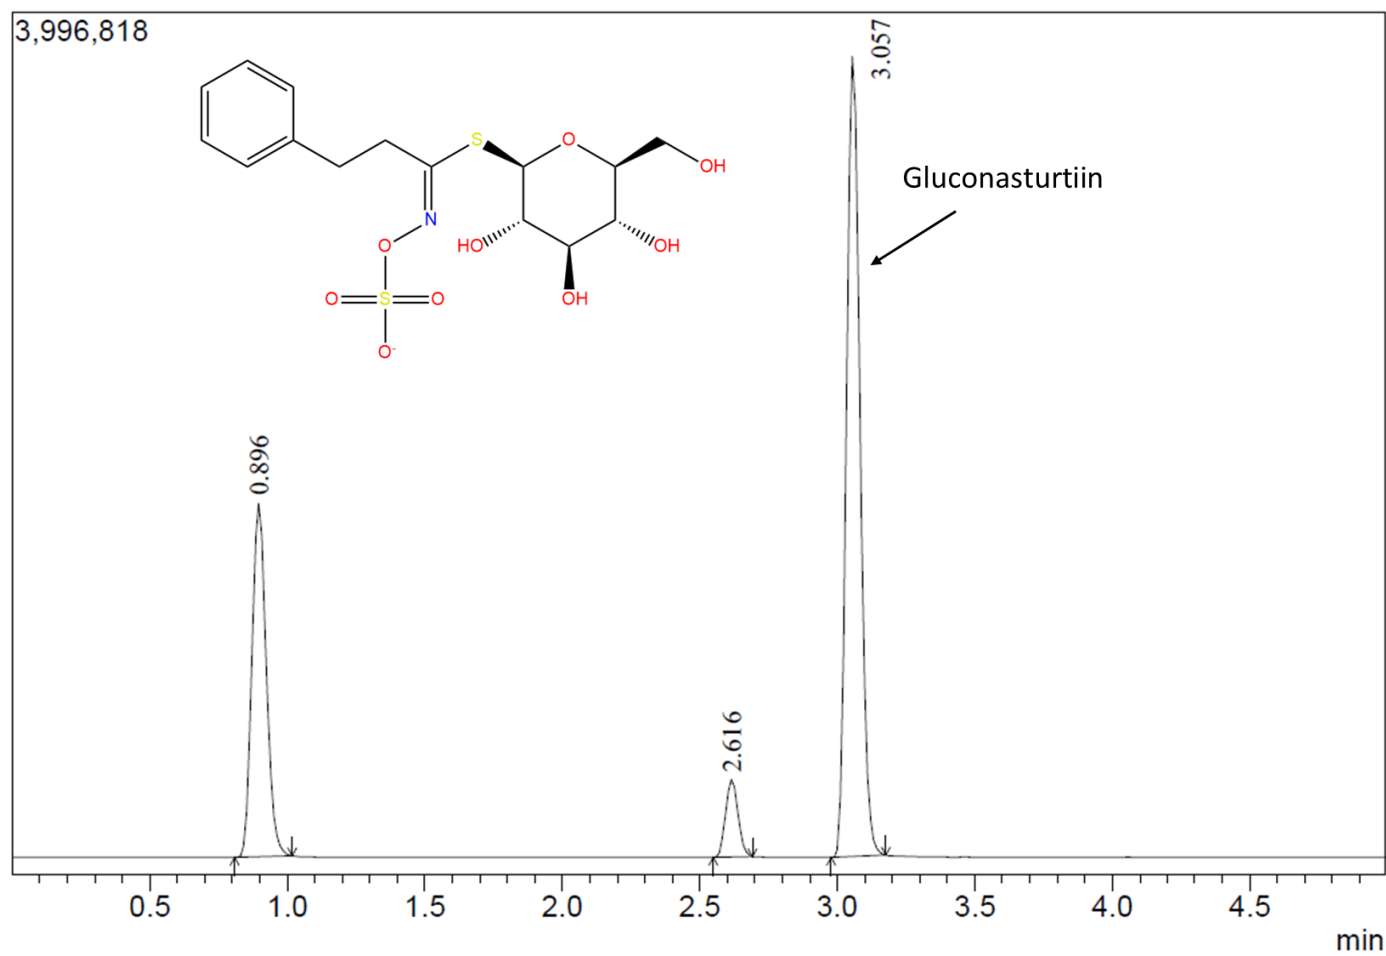

# Neoglucobrassicin

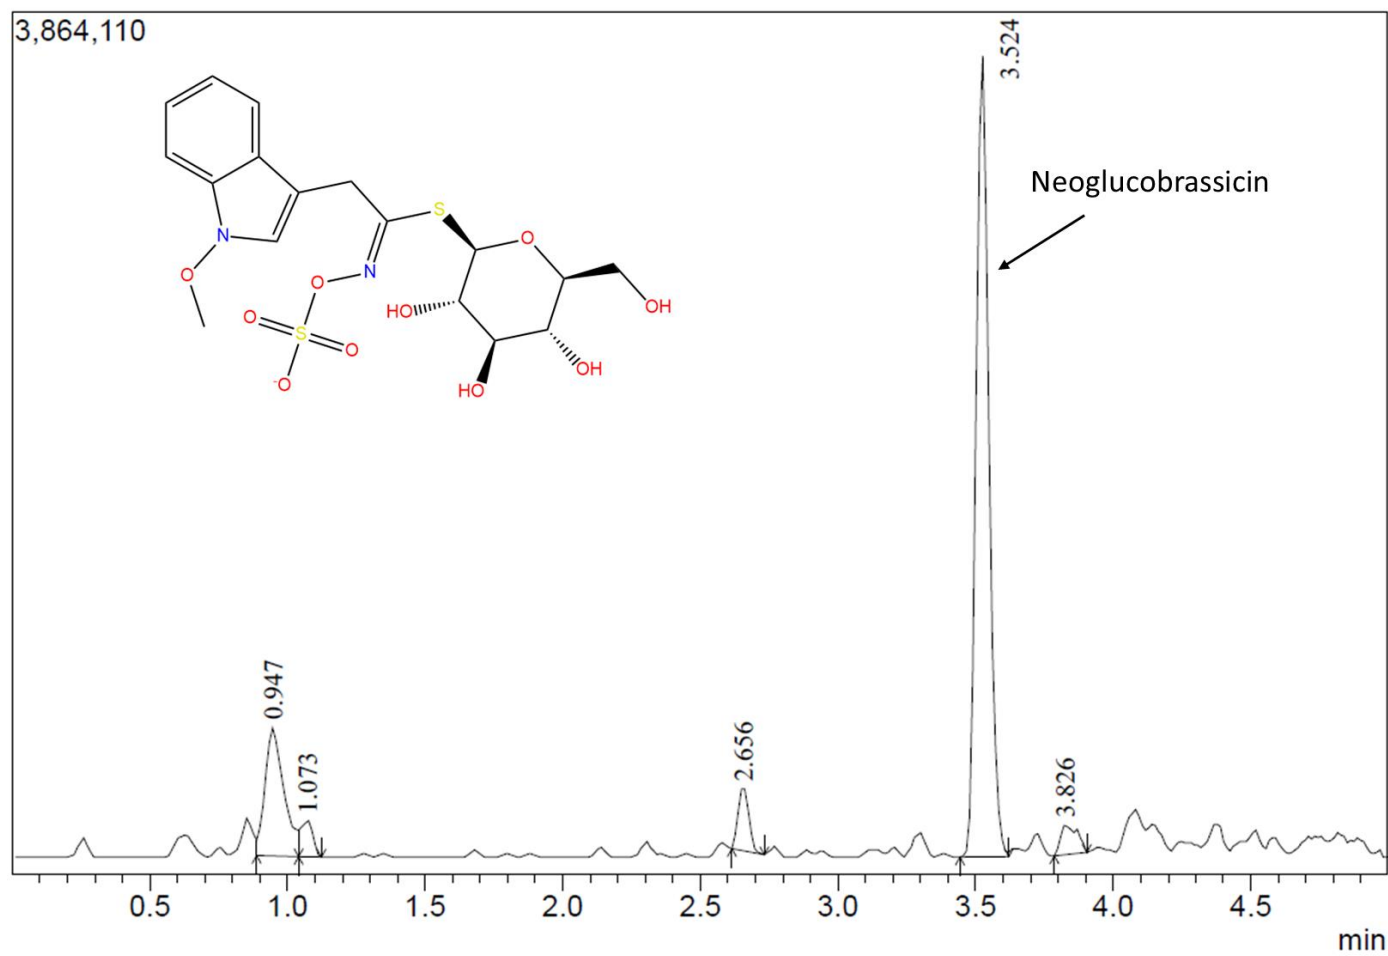



## 4-methylpentyl GSL

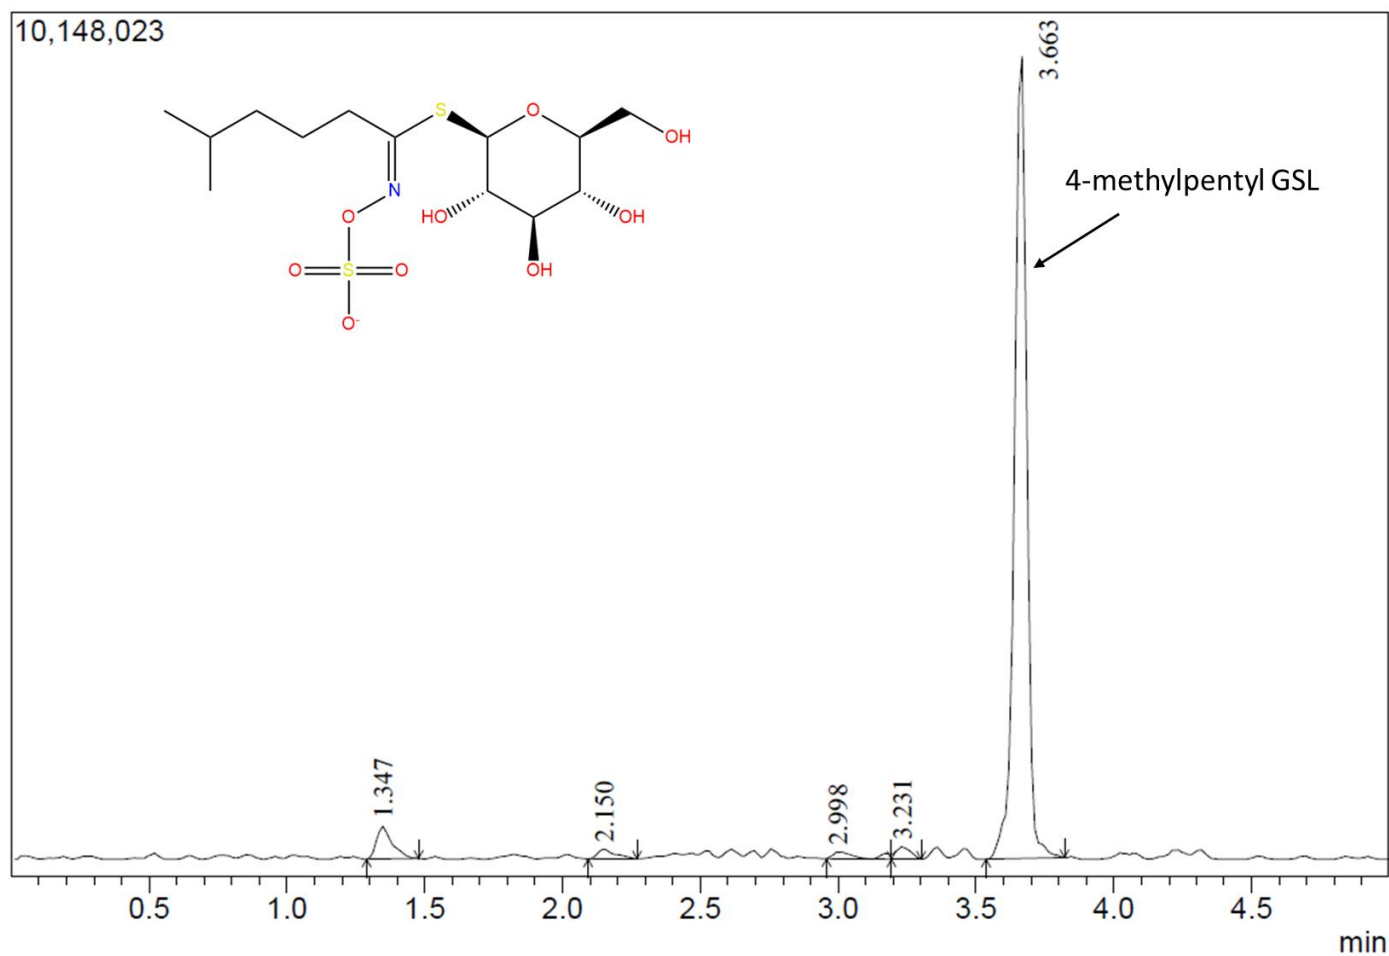

Hexyl GSL

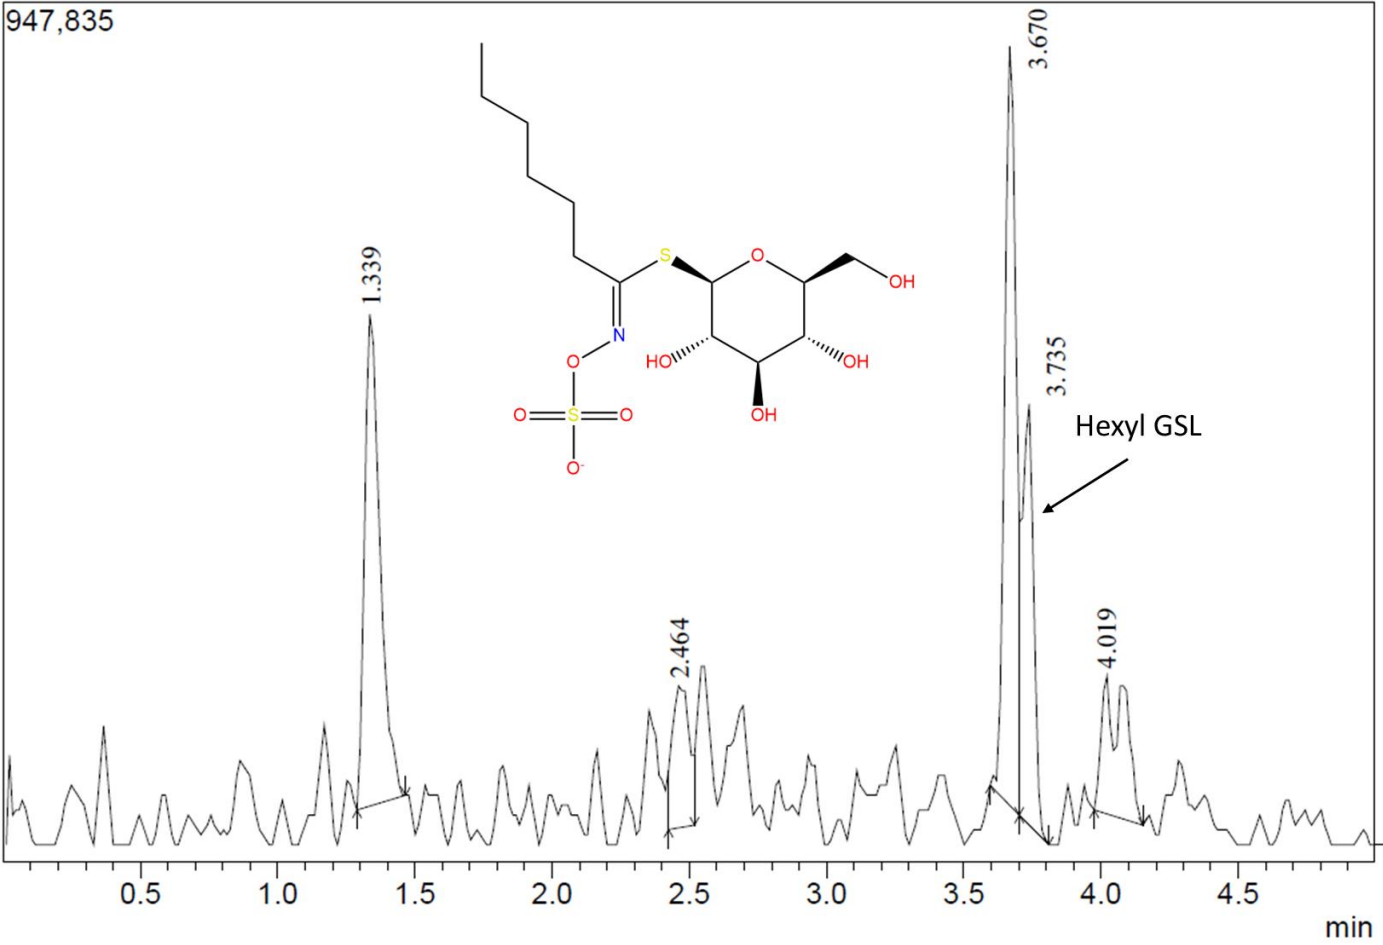

# 7-(methylthio)heptyl GSL

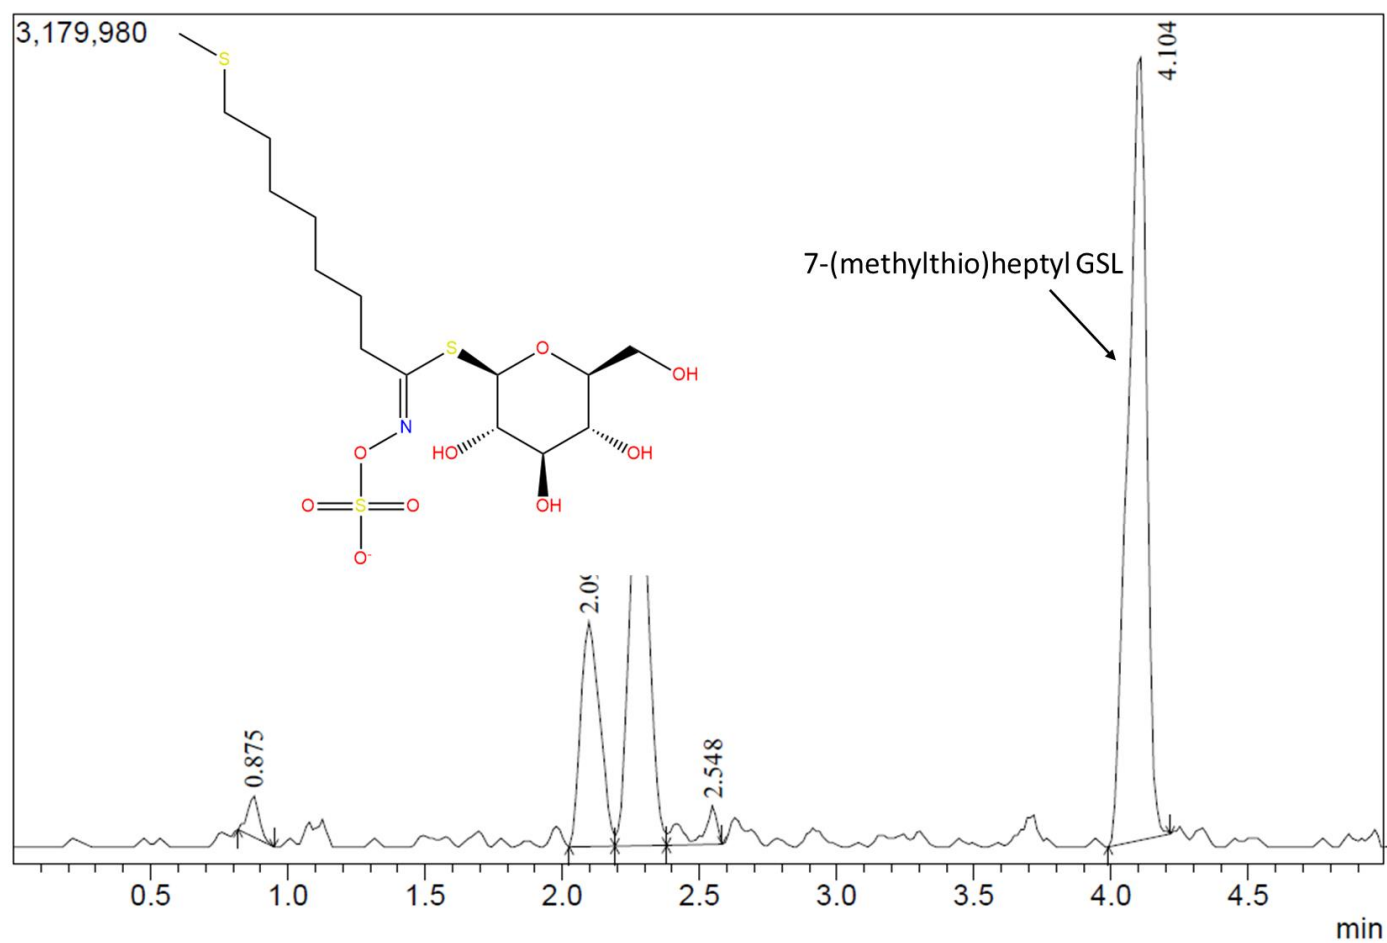

# Butyl GSL

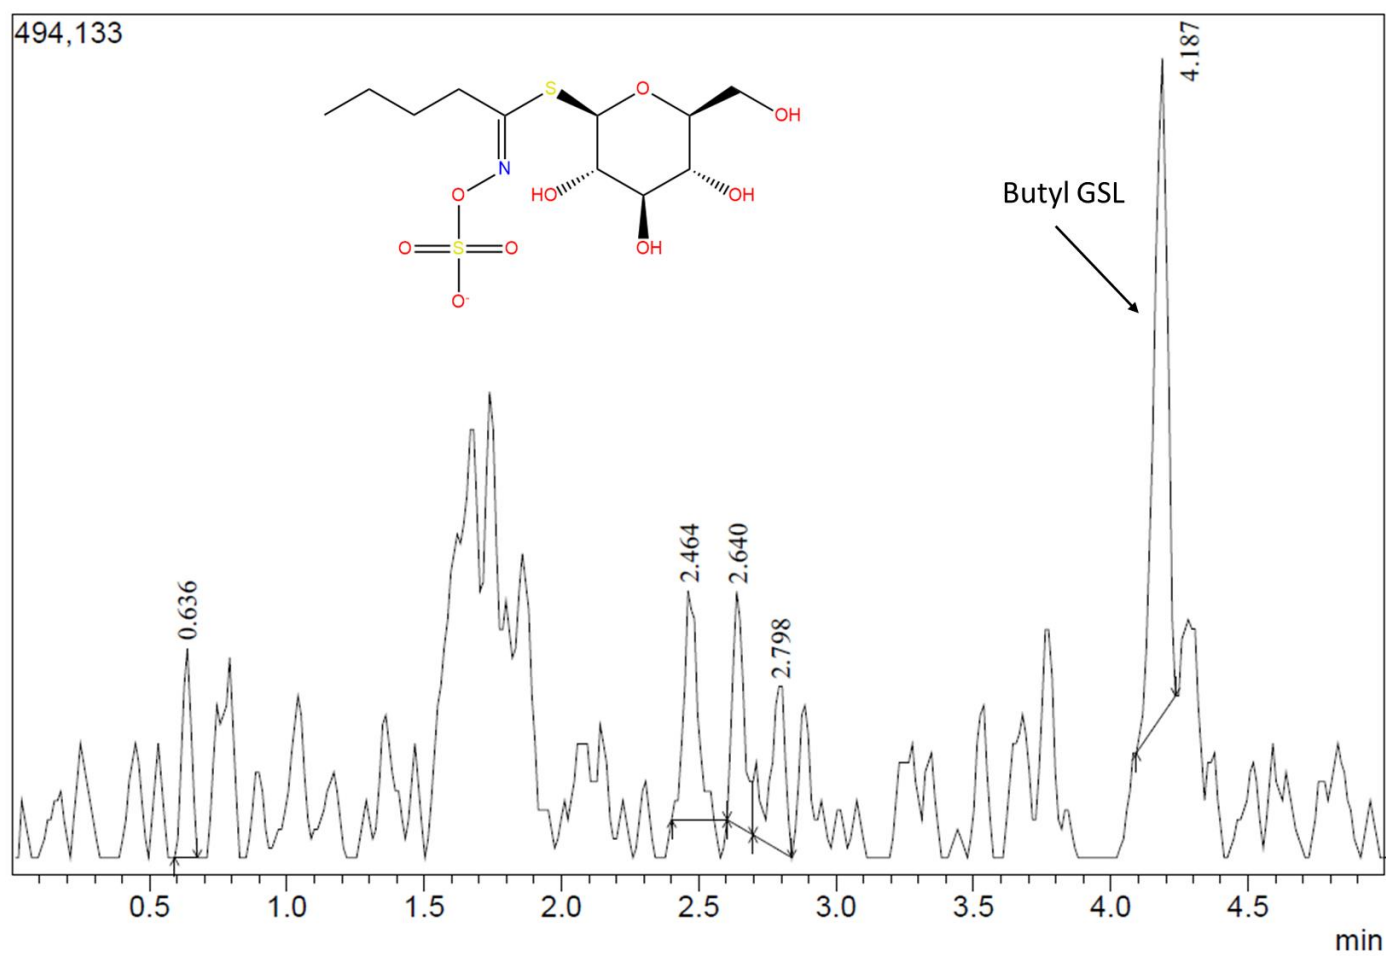

Supplement: s1 [file s1]
